# Supplementary material
Source: ML conference proceedings conference paper supplement (https://openreview.net/forum?id=P23YpnH3kq)

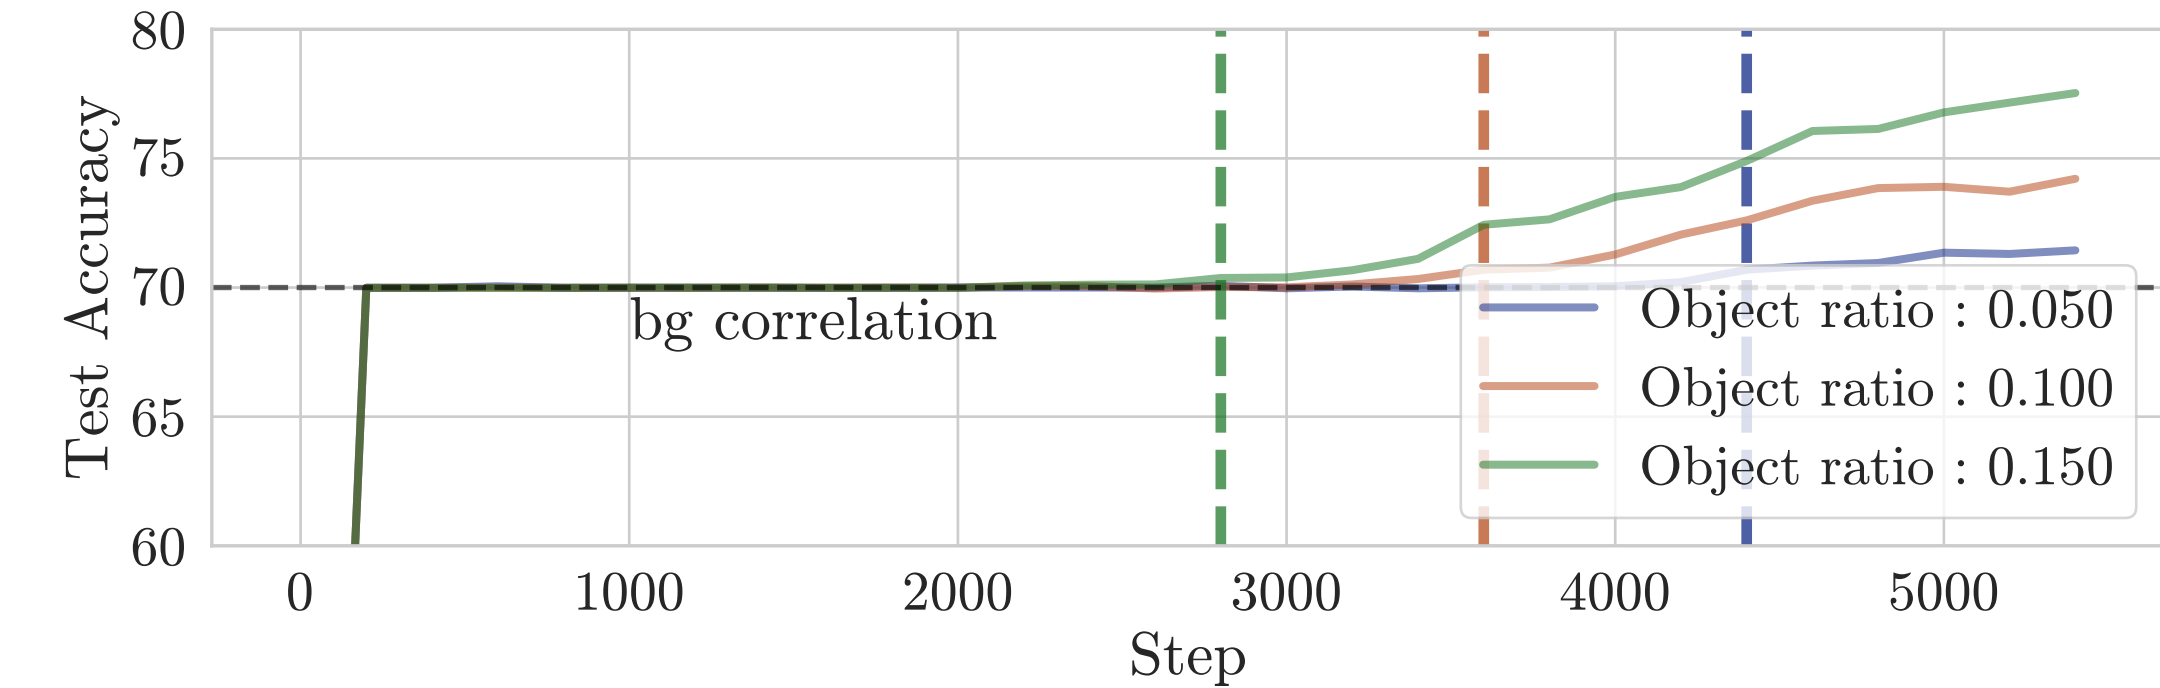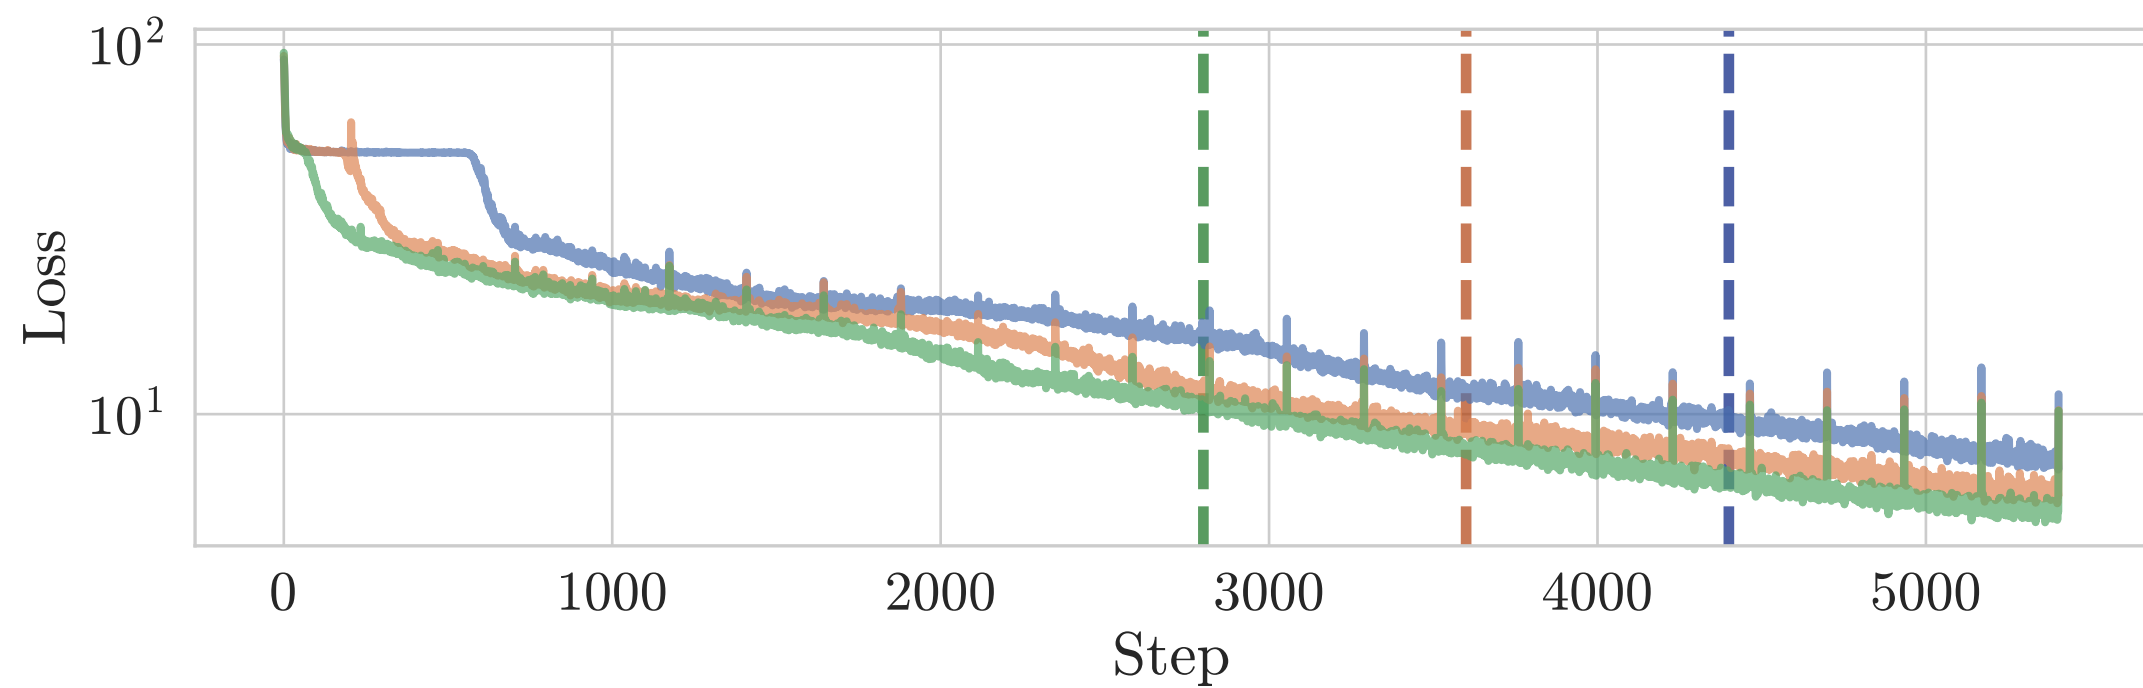

Supplement: supplementary_material [file acc_loss.pdf › iclr2026/iclr/feature_preference/practical/colored_mnist/figure/acc_loss.pdf]

Eigenvalue of digit ratio : 0.05

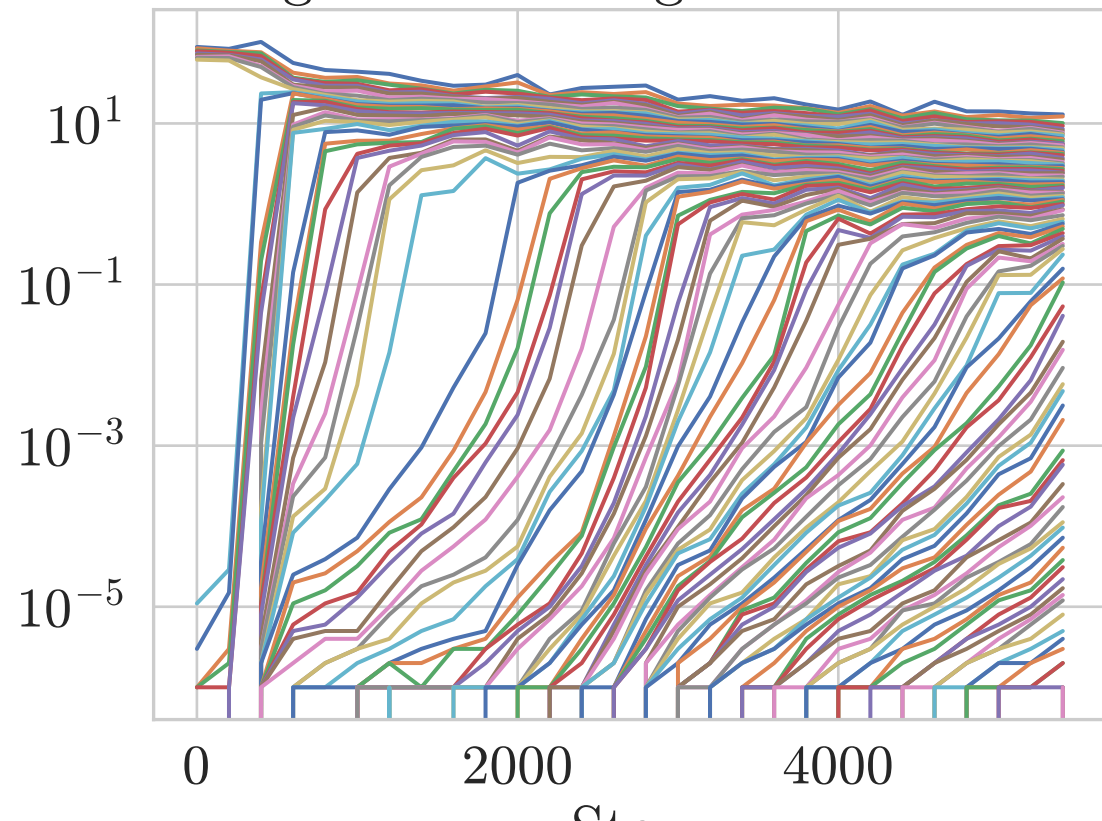

Supplement: supplementary_material [file eigenvalue_0.05.pdf › iclr2026/iclr/feature_preference/practical/colored_mnist/figure/eigenvalue_0.05.pdf]

Eigenvalue of digit ratio : 0.10

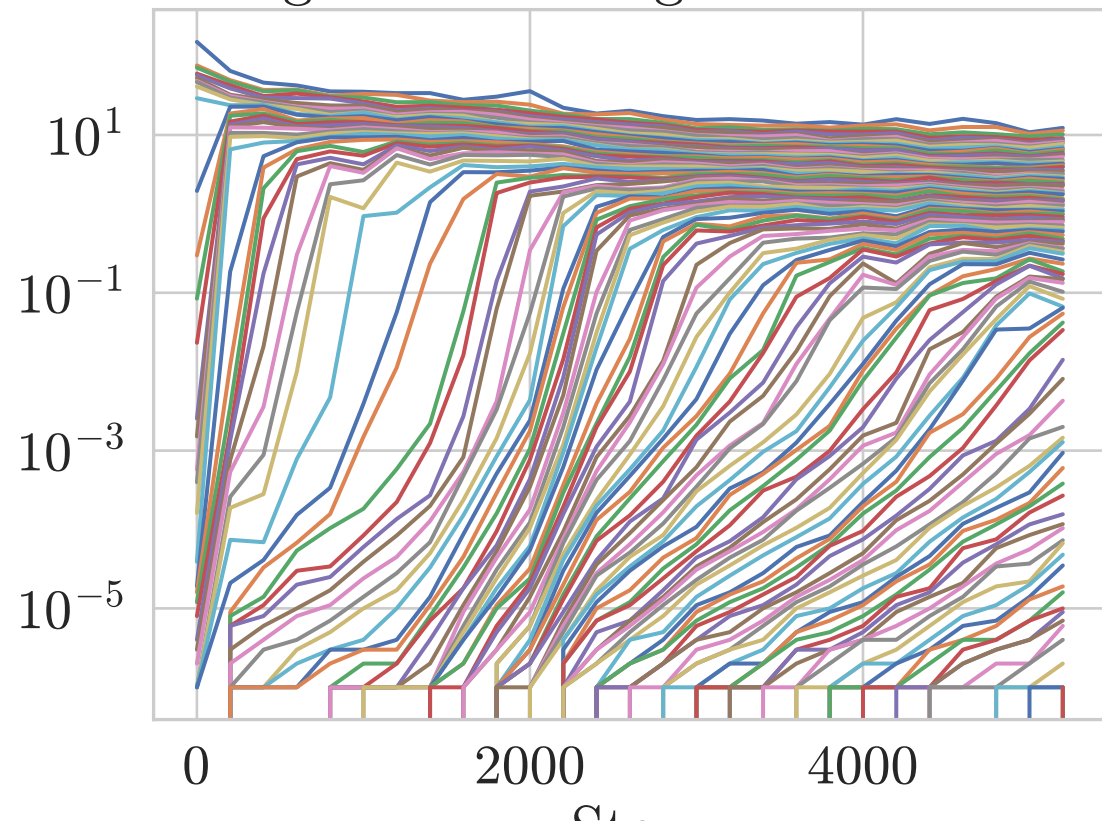

Supplement: supplementary_material [file eigenvalue_0.10.pdf › iclr2026/iclr/feature_preference/practical/colored_mnist/figure/eigenvalue_0.10.pdf]

Eigenvalue of digit ratio : 0.15

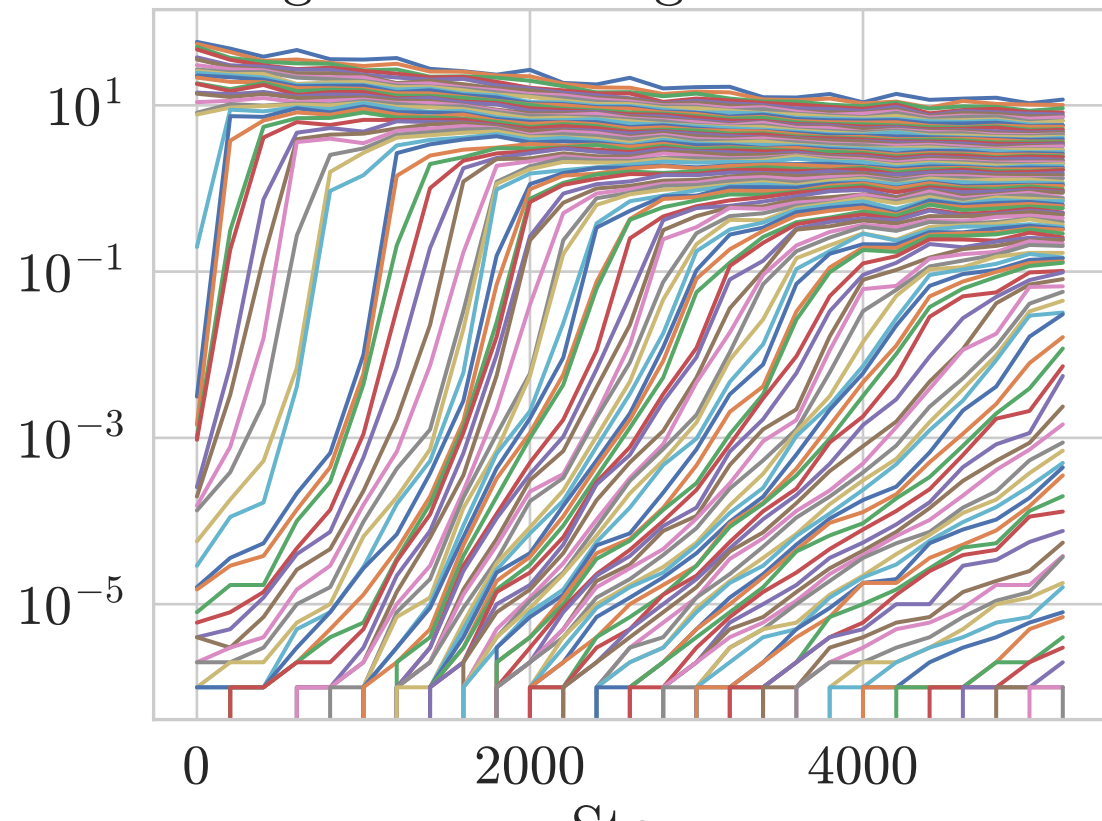

Supplement: supplementary_material [file eigenvalue_0.15.pdf › iclr2026/iclr/feature_preference/practical/colored_mnist/figure/eigenvalue_0.15.pdf]

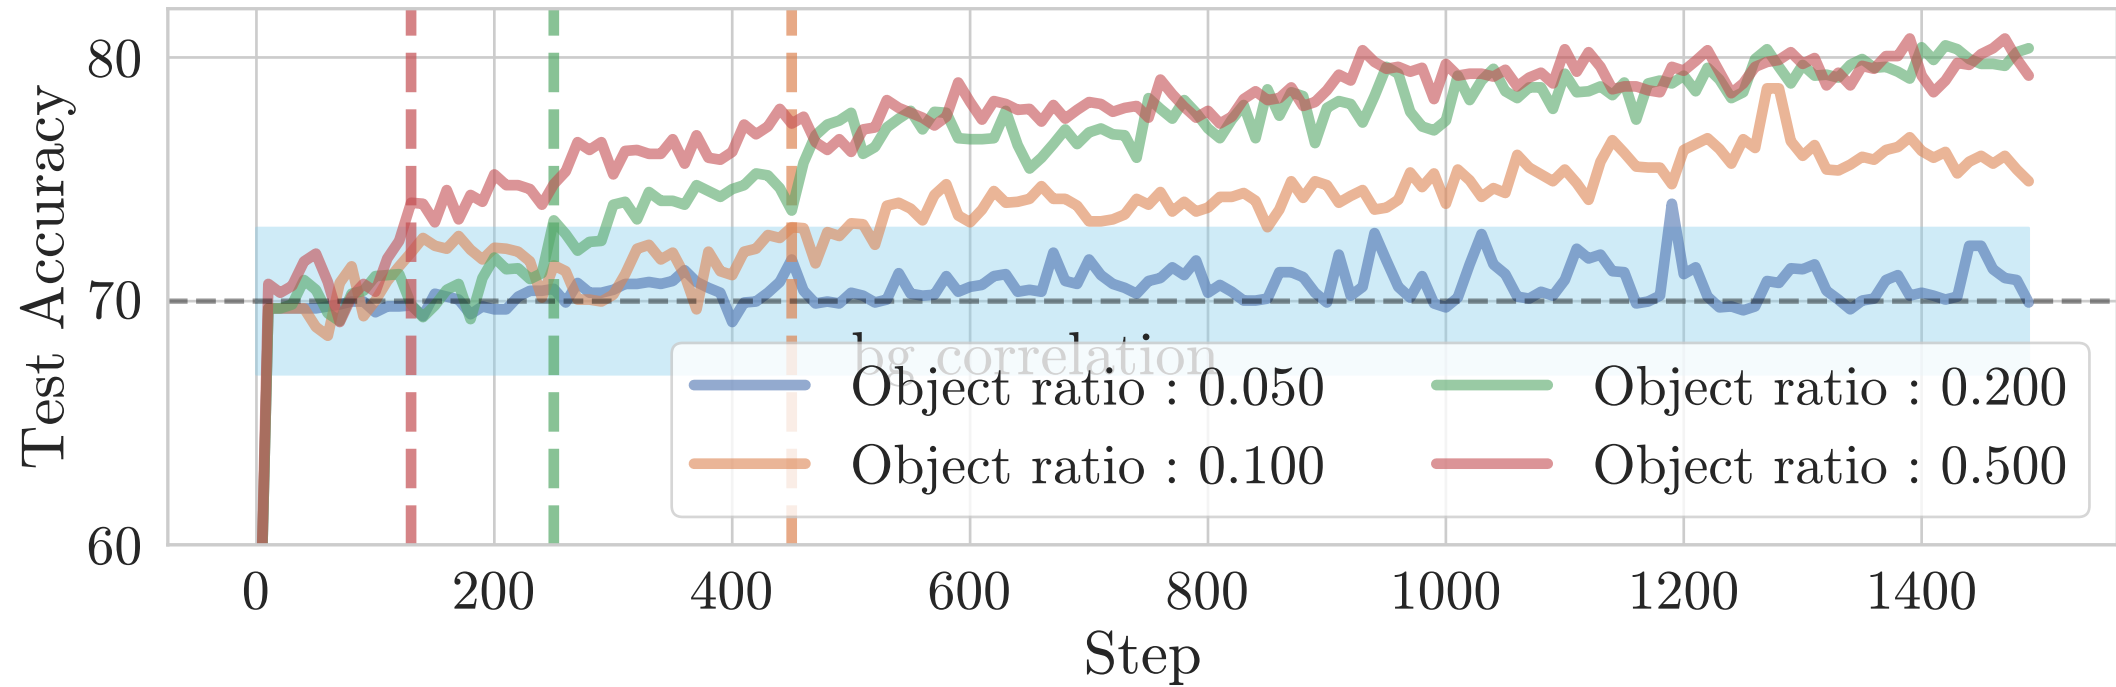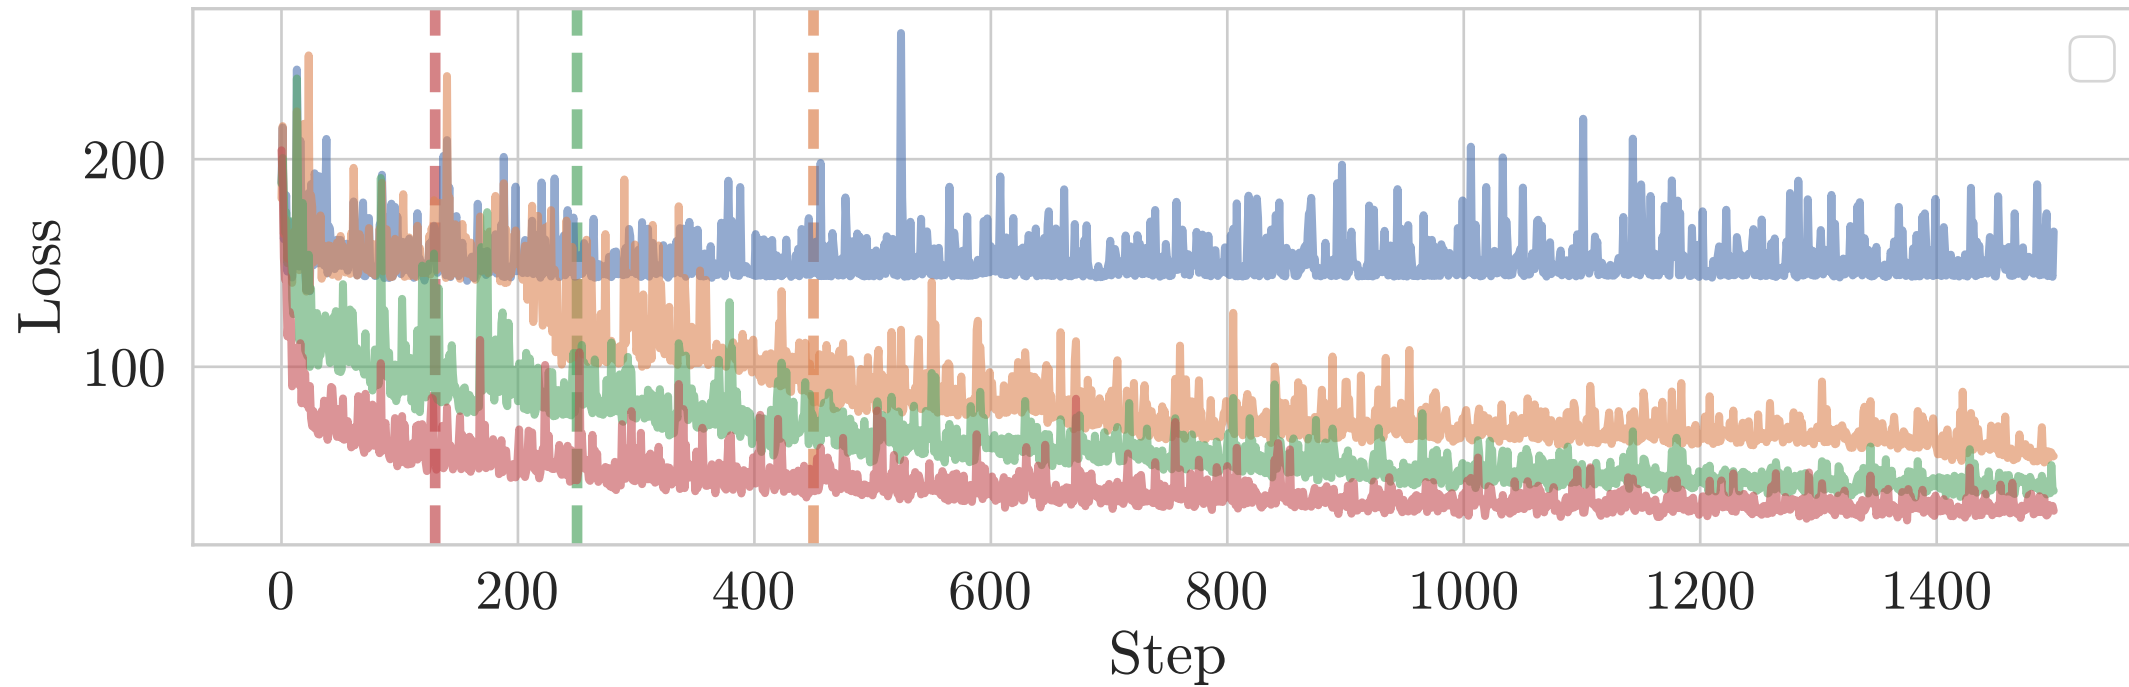

Supplement: supplementary_material [file waterbirds_color_background.pdf › iclr2026/iclr/feature_preference/practical/waterbirds/figure/waterbirds_color_background.pdf]

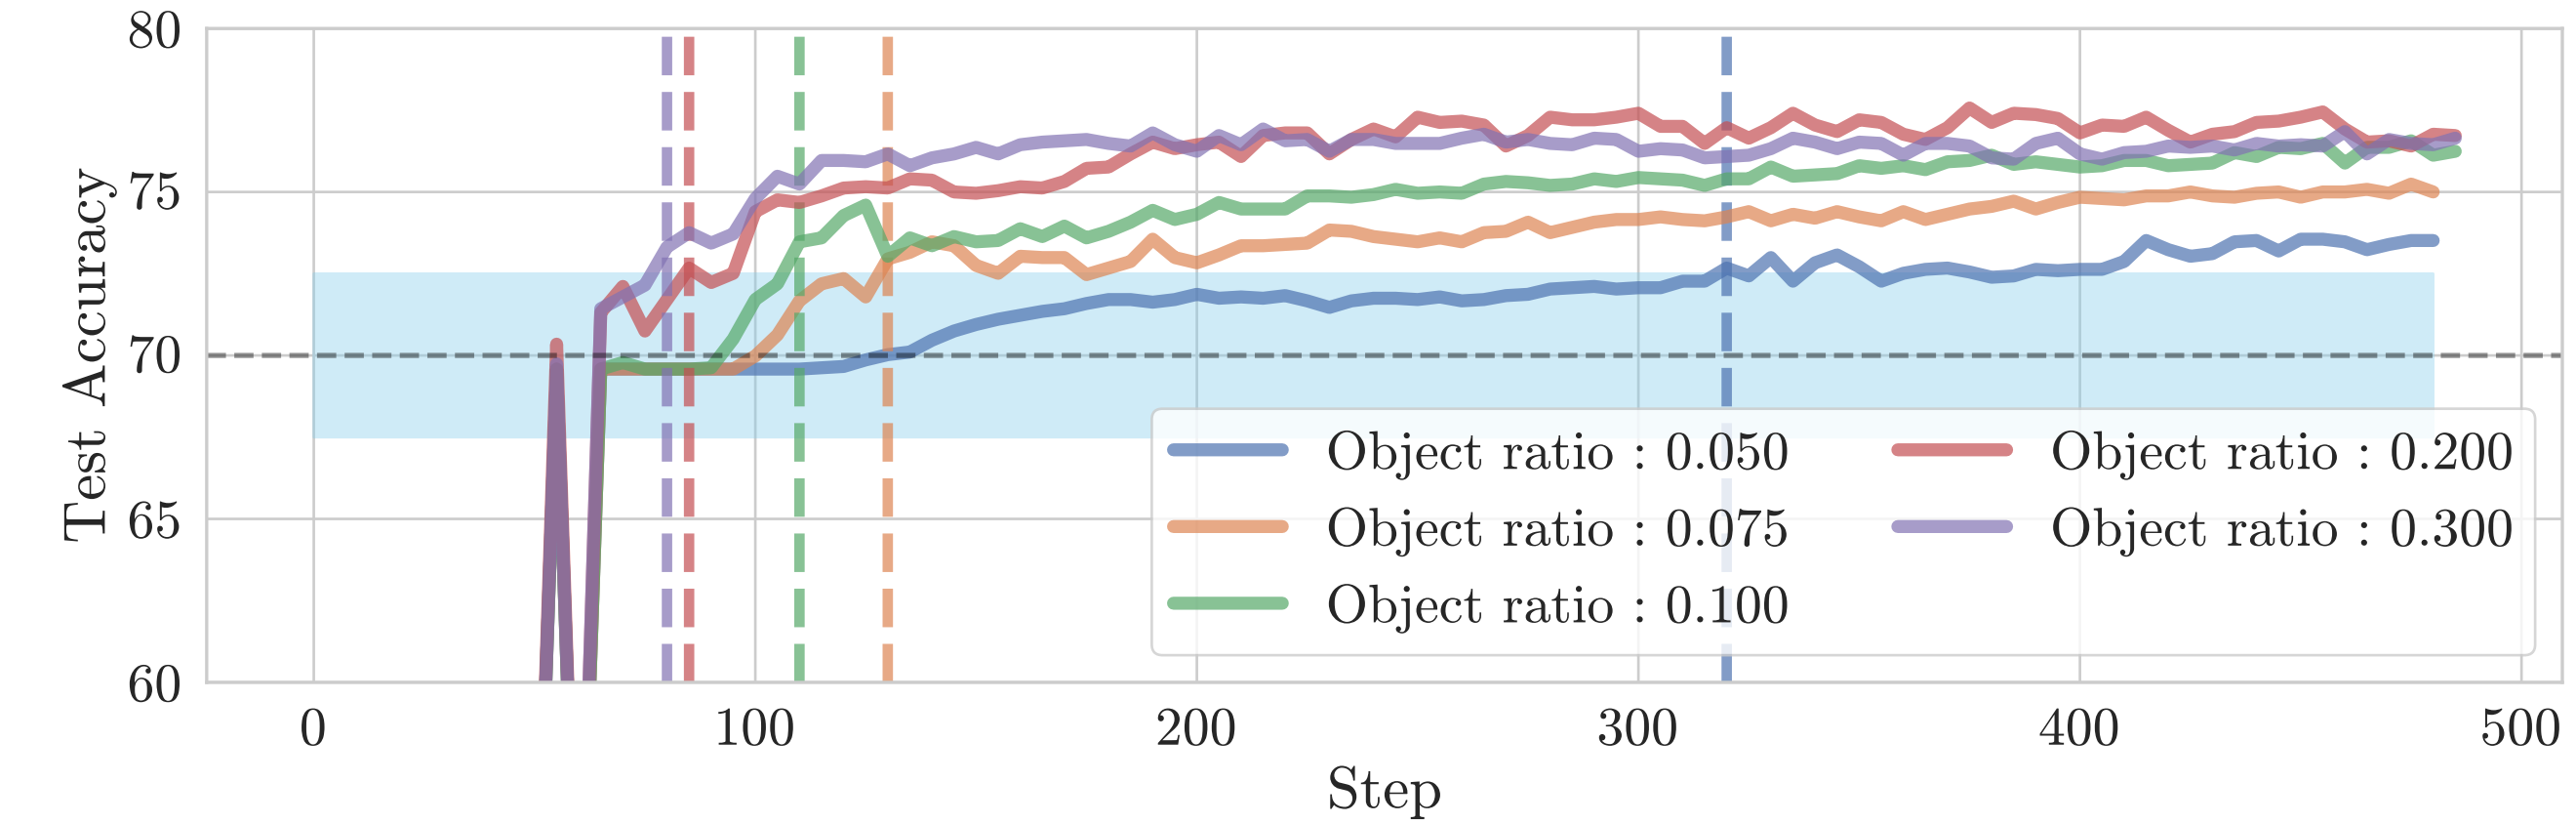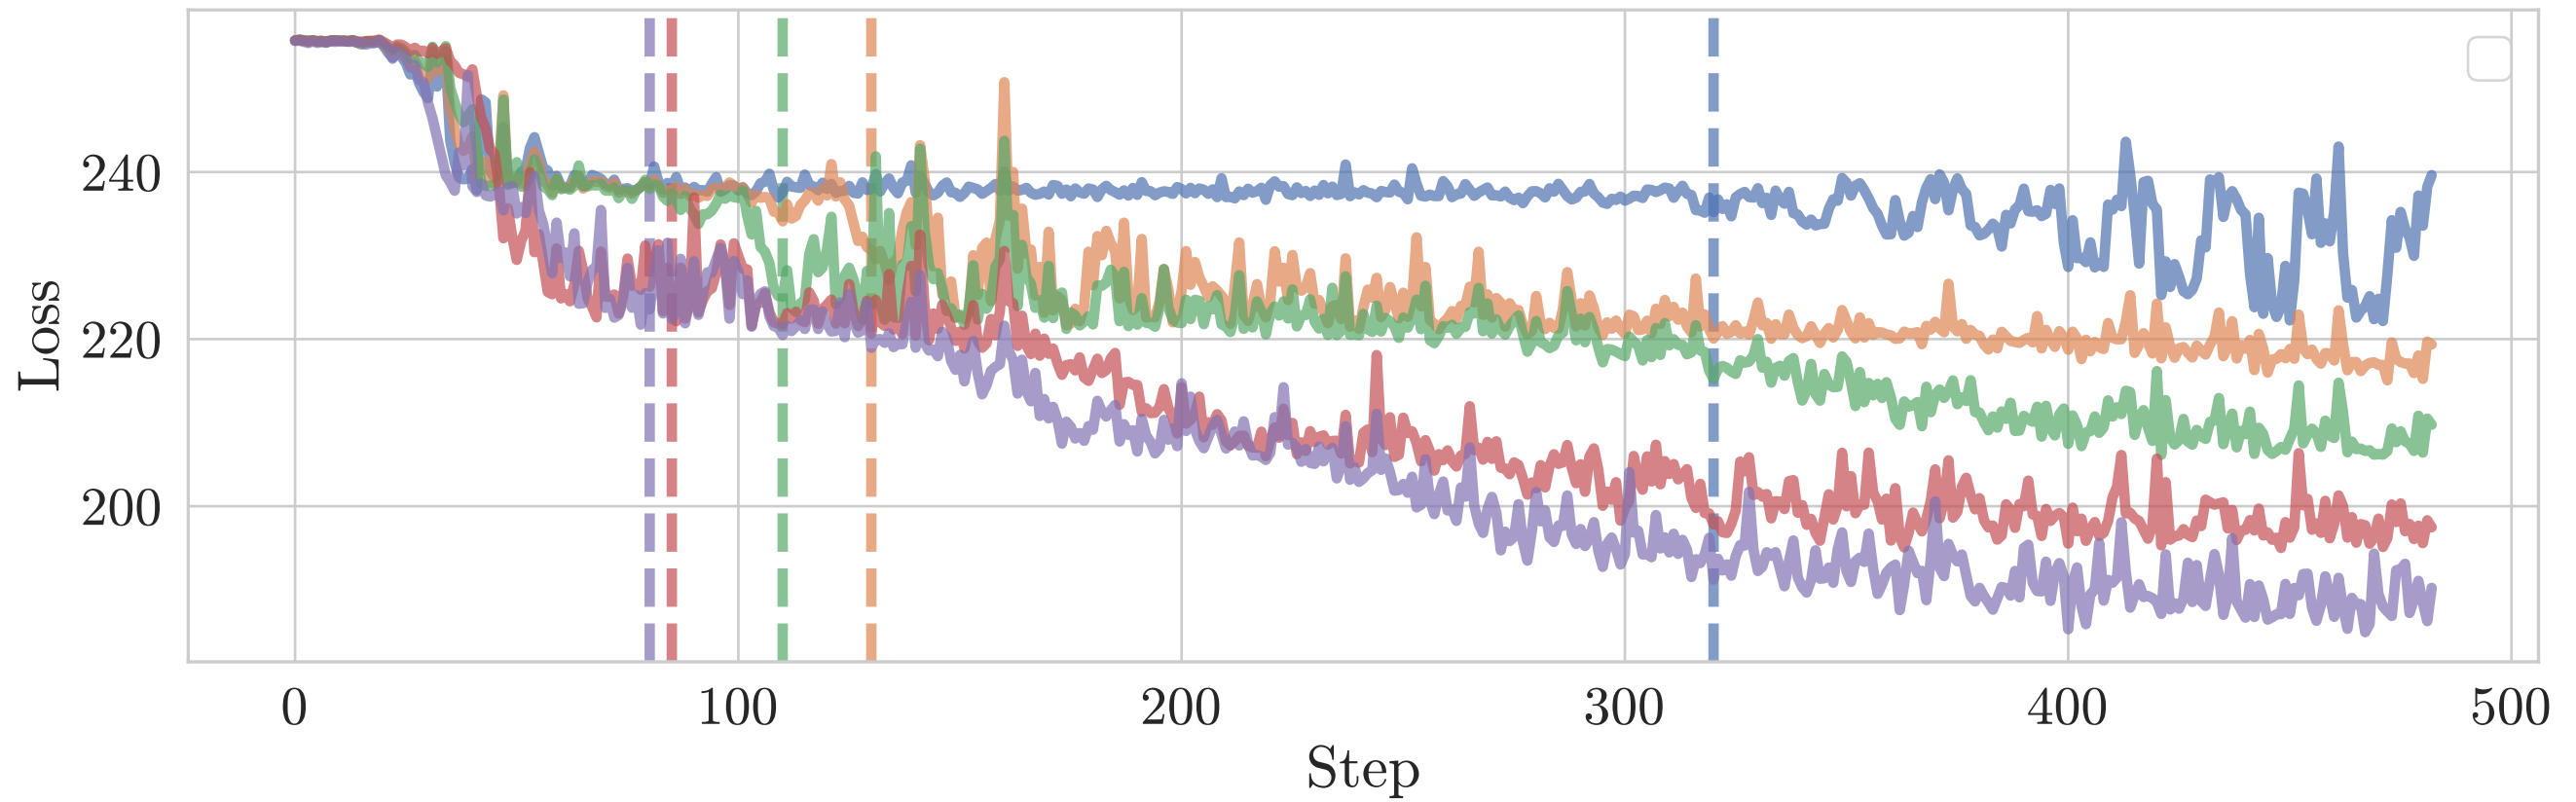

Supplement: supplementary_material [file waterbirds_single_background.pdf › iclr2026/iclr/feature_preference/practical/waterbirds/figure/waterbirds_single_background.pdf]

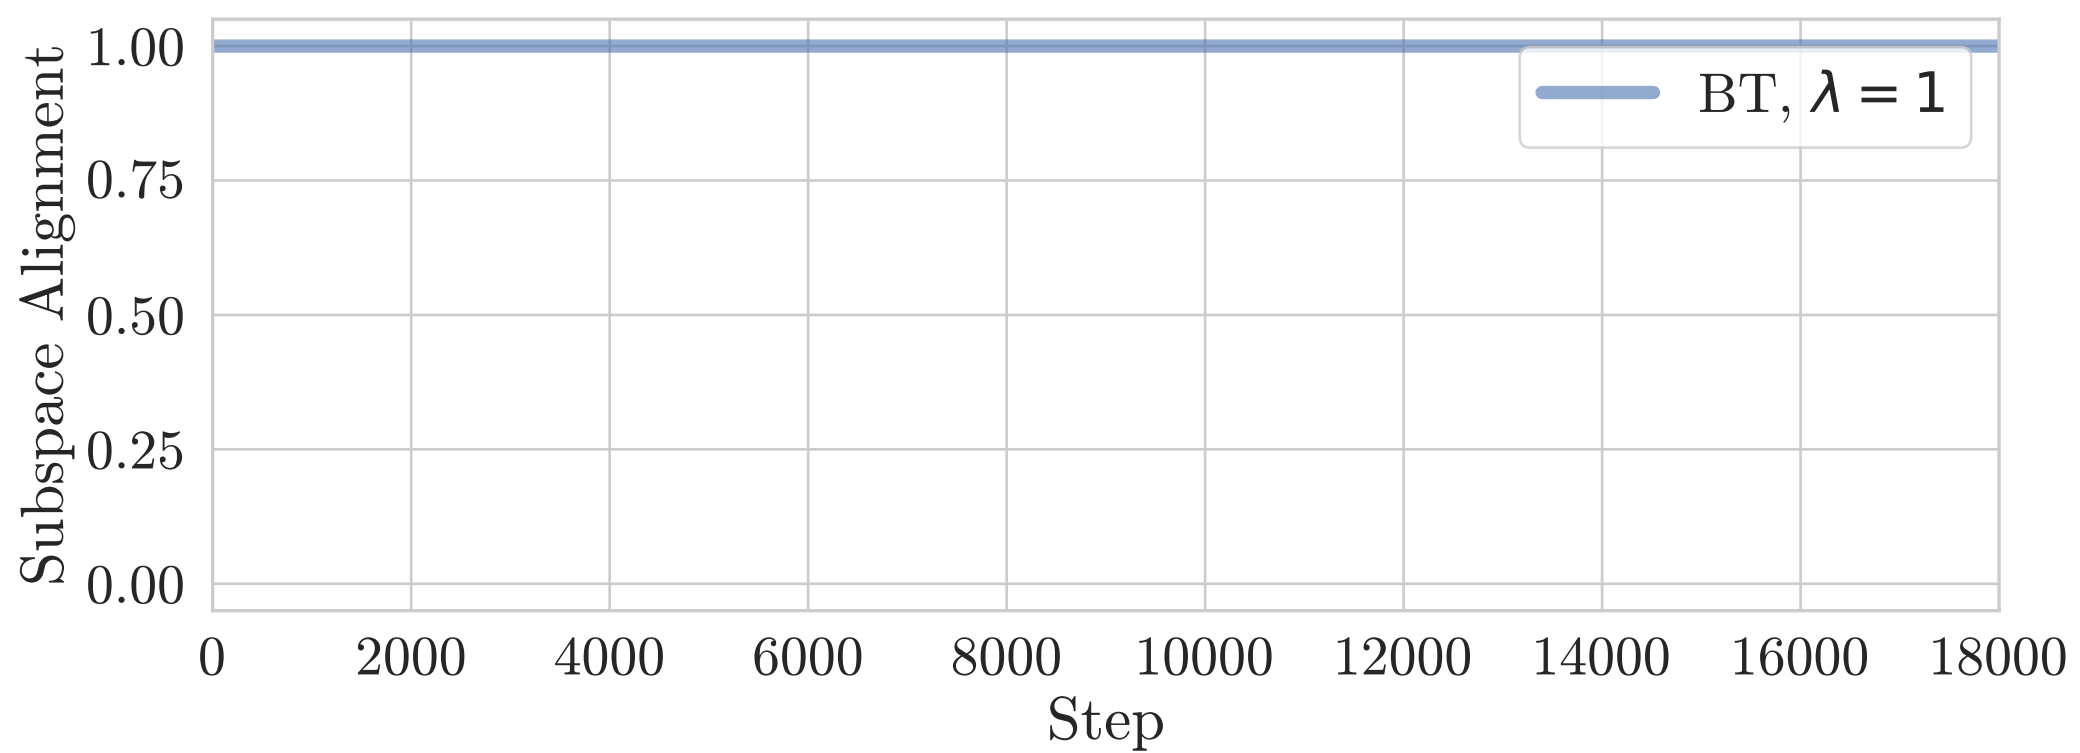

Supplement: supplementary_material [file dim_alignment.pdf › iclr2026/iclr/feature_preference/theoretical/deep/figure/balanced/dim_alignment.pdf]

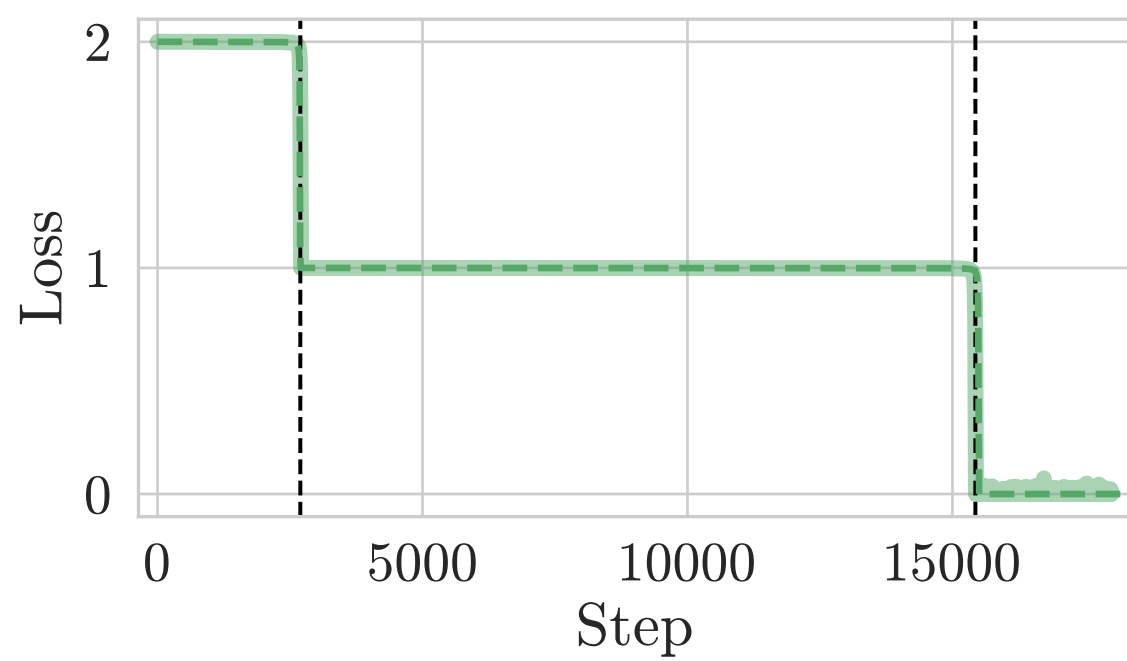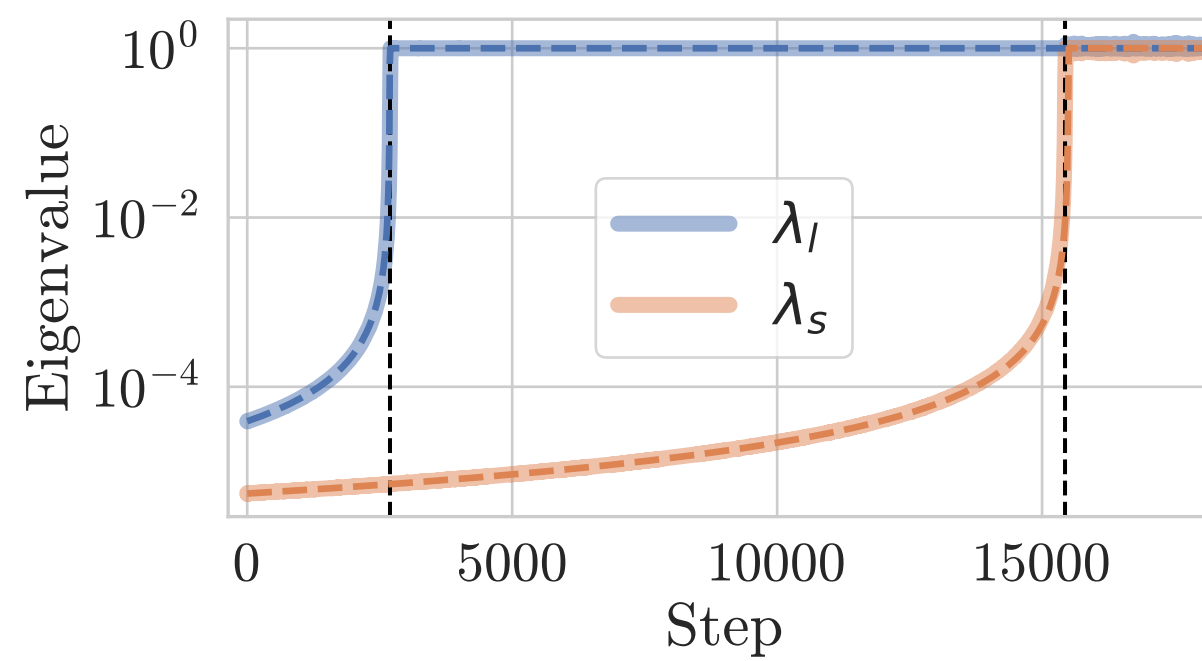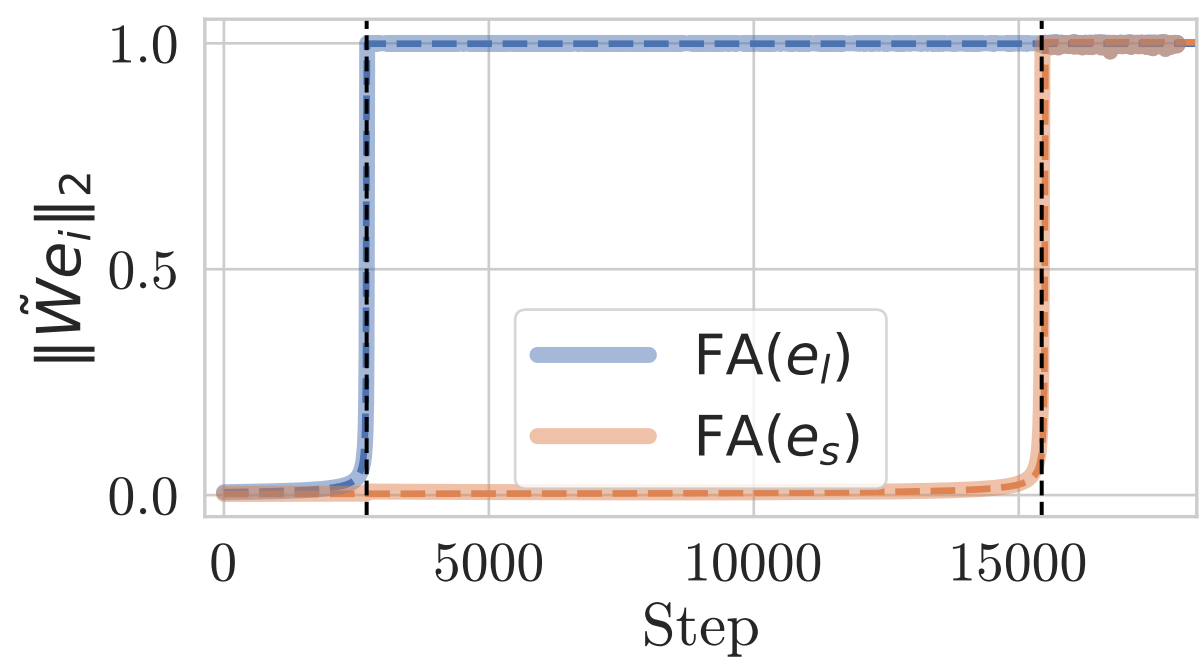

Supplement: supplementary_material [file dim_loss_eig_align.pdf › iclr2026/iclr/feature_preference/theoretical/deep/figure/balanced/dim_loss_eig_align.pdf]

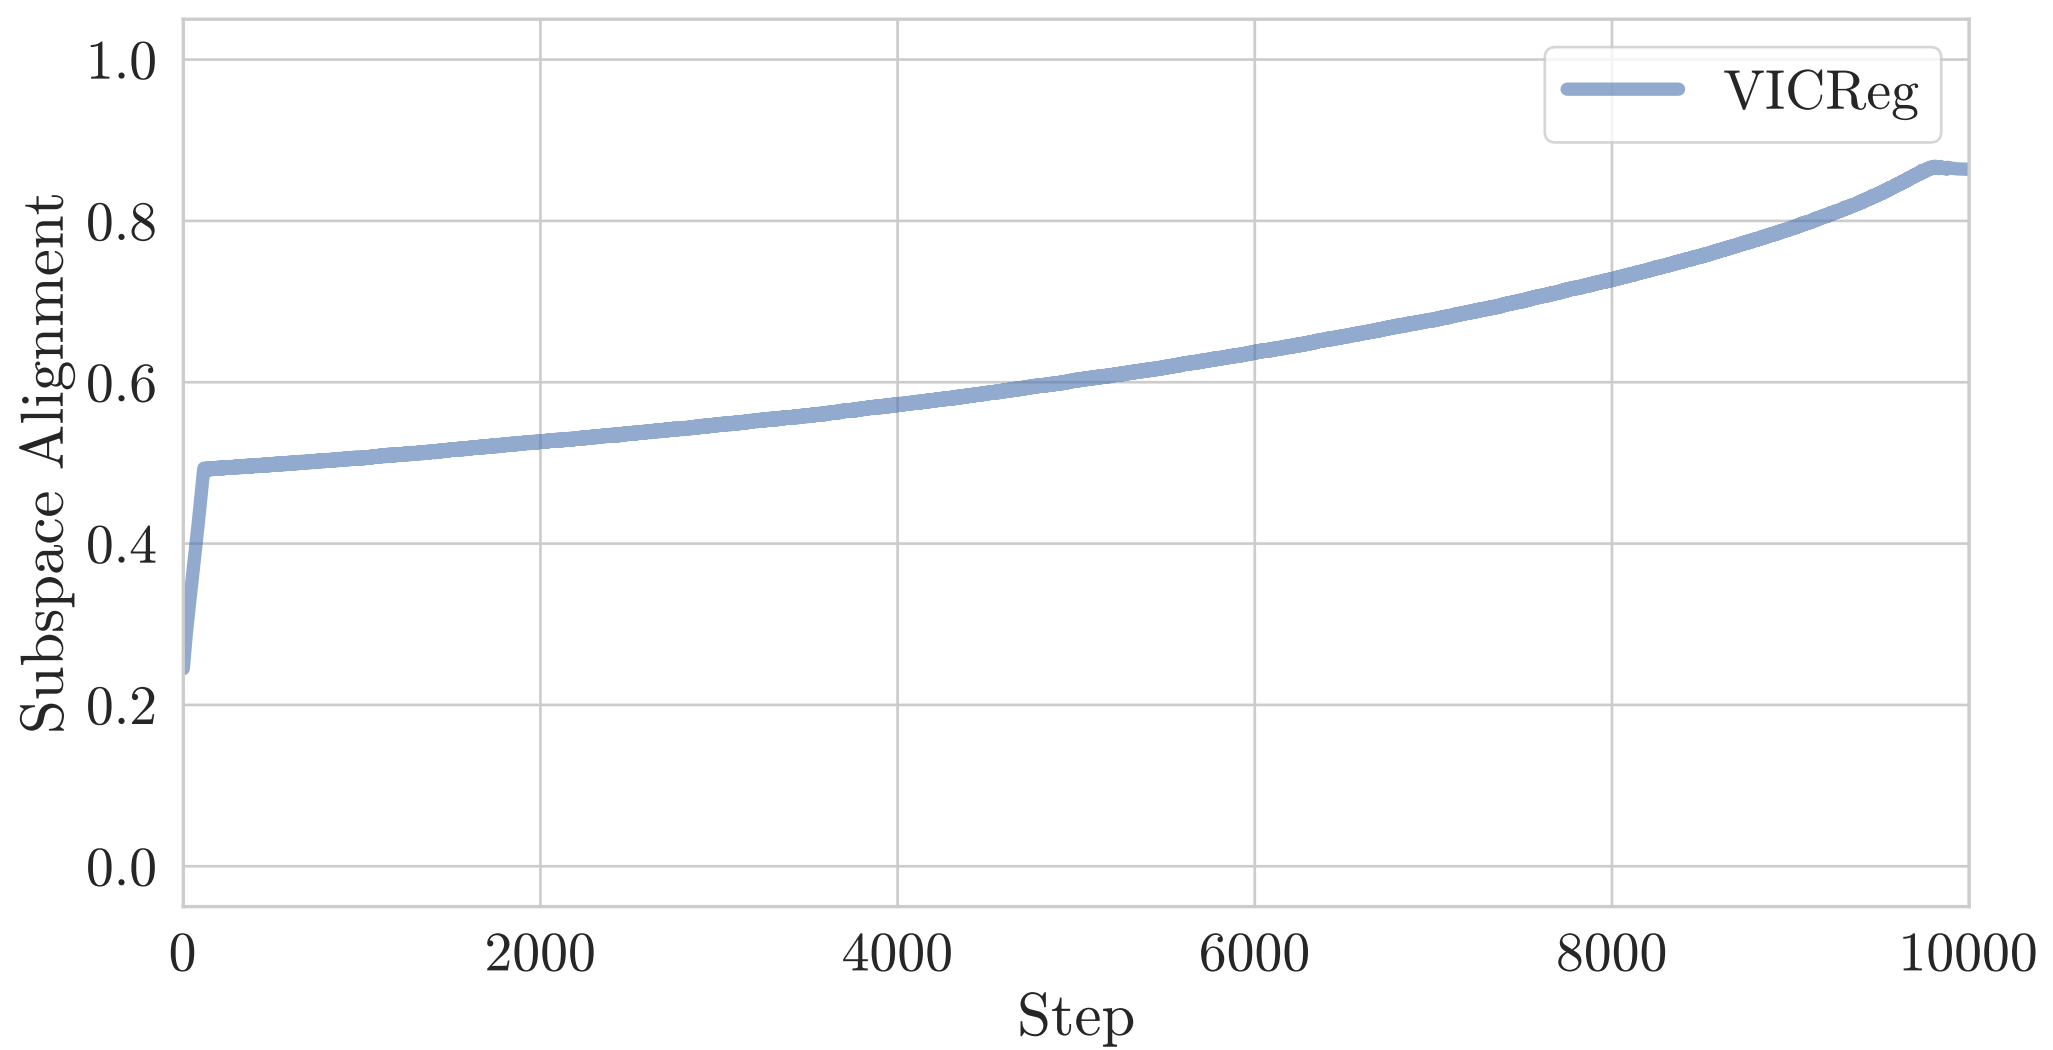

Supplement: supplementary_material [file dim_alignment.pdf › iclr2026/iclr/feature_preference/theoretical/deep/figure/barlowtwins/dim_alignment.pdf]

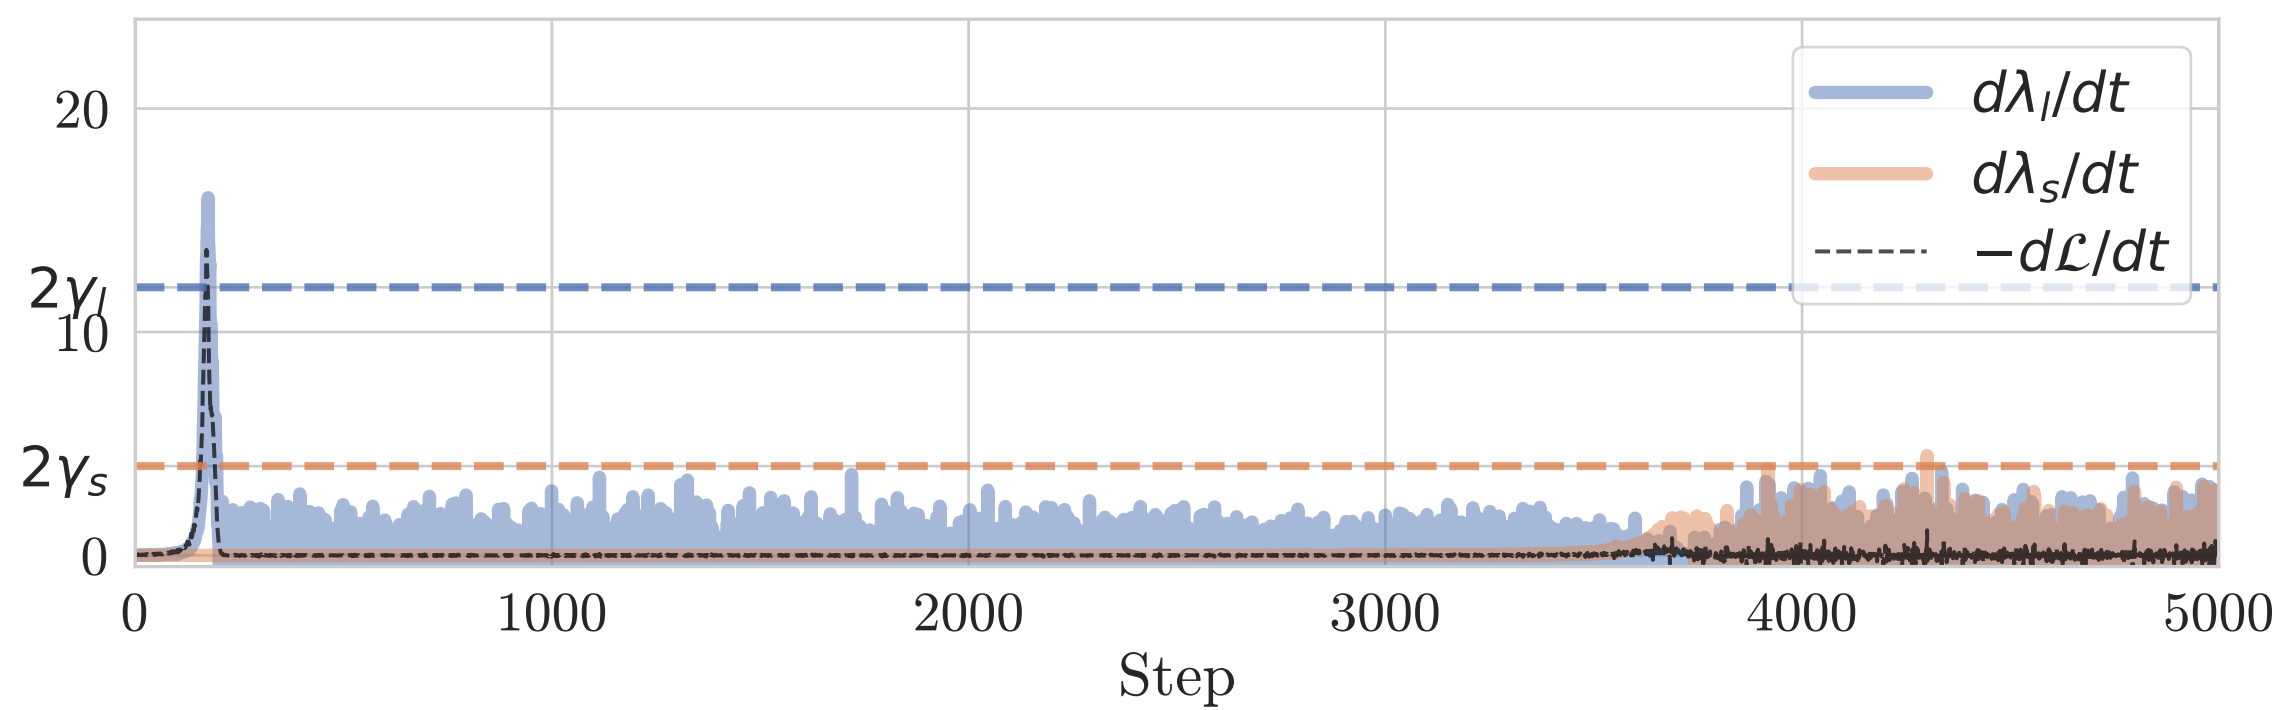

Supplement: supplementary_material [file dim_dcdt_dldt_0.1.pdf › iclr2026/iclr/feature_preference/theoretical/deep/figure/barlowtwins/dim_dcdt_dldt_0.1.pdf]

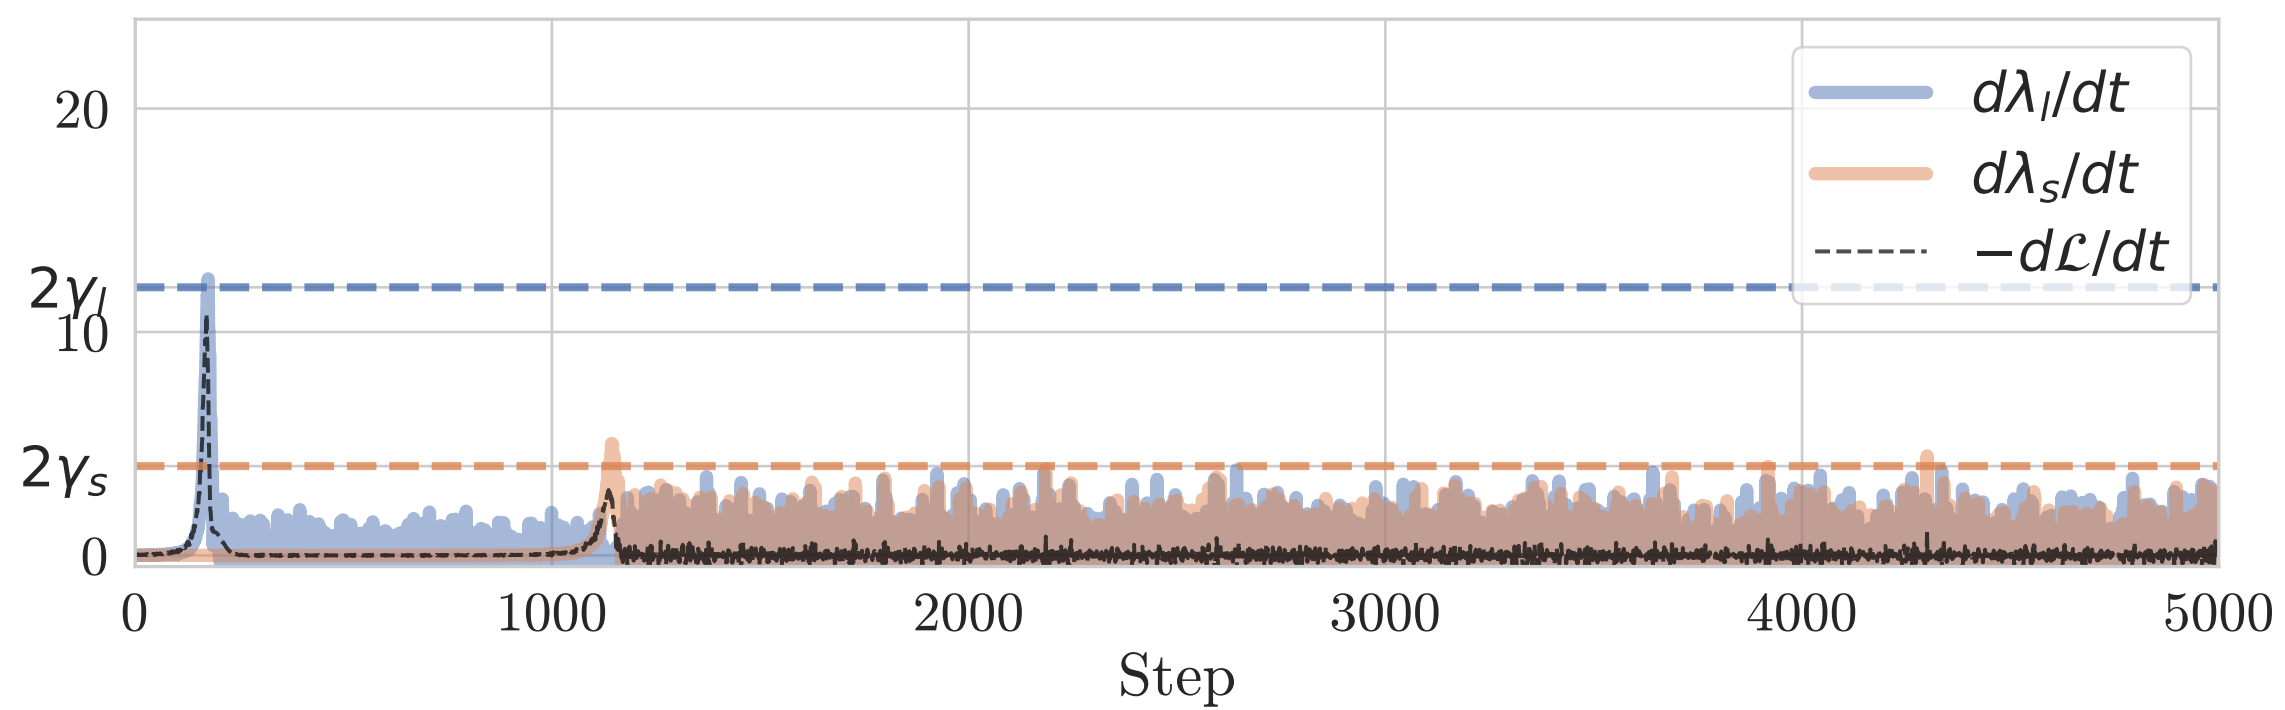

Supplement: supplementary_material [file dim_dcdt_dldt_0.5.pdf › iclr2026/iclr/feature_preference/theoretical/deep/figure/barlowtwins/dim_dcdt_dldt_0.5.pdf]

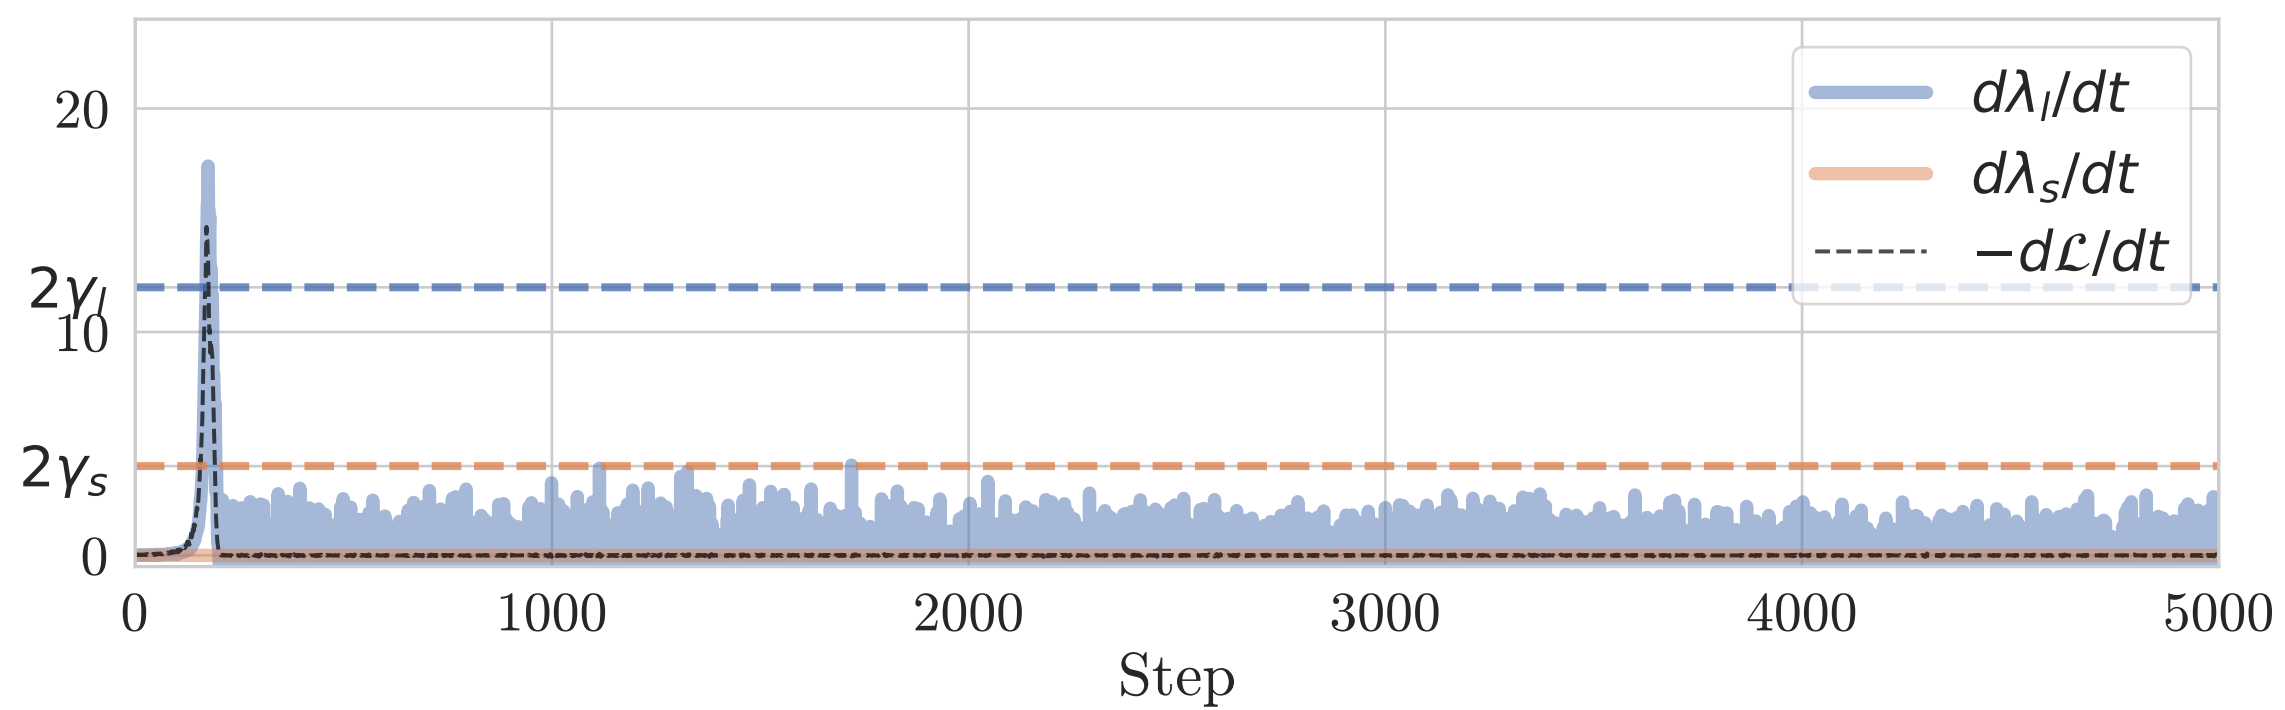

Supplement: supplementary_material [file dim_dcdt_dldt_0.pdf › iclr2026/iclr/feature_preference/theoretical/deep/figure/barlowtwins/dim_dcdt_dldt_0.pdf]

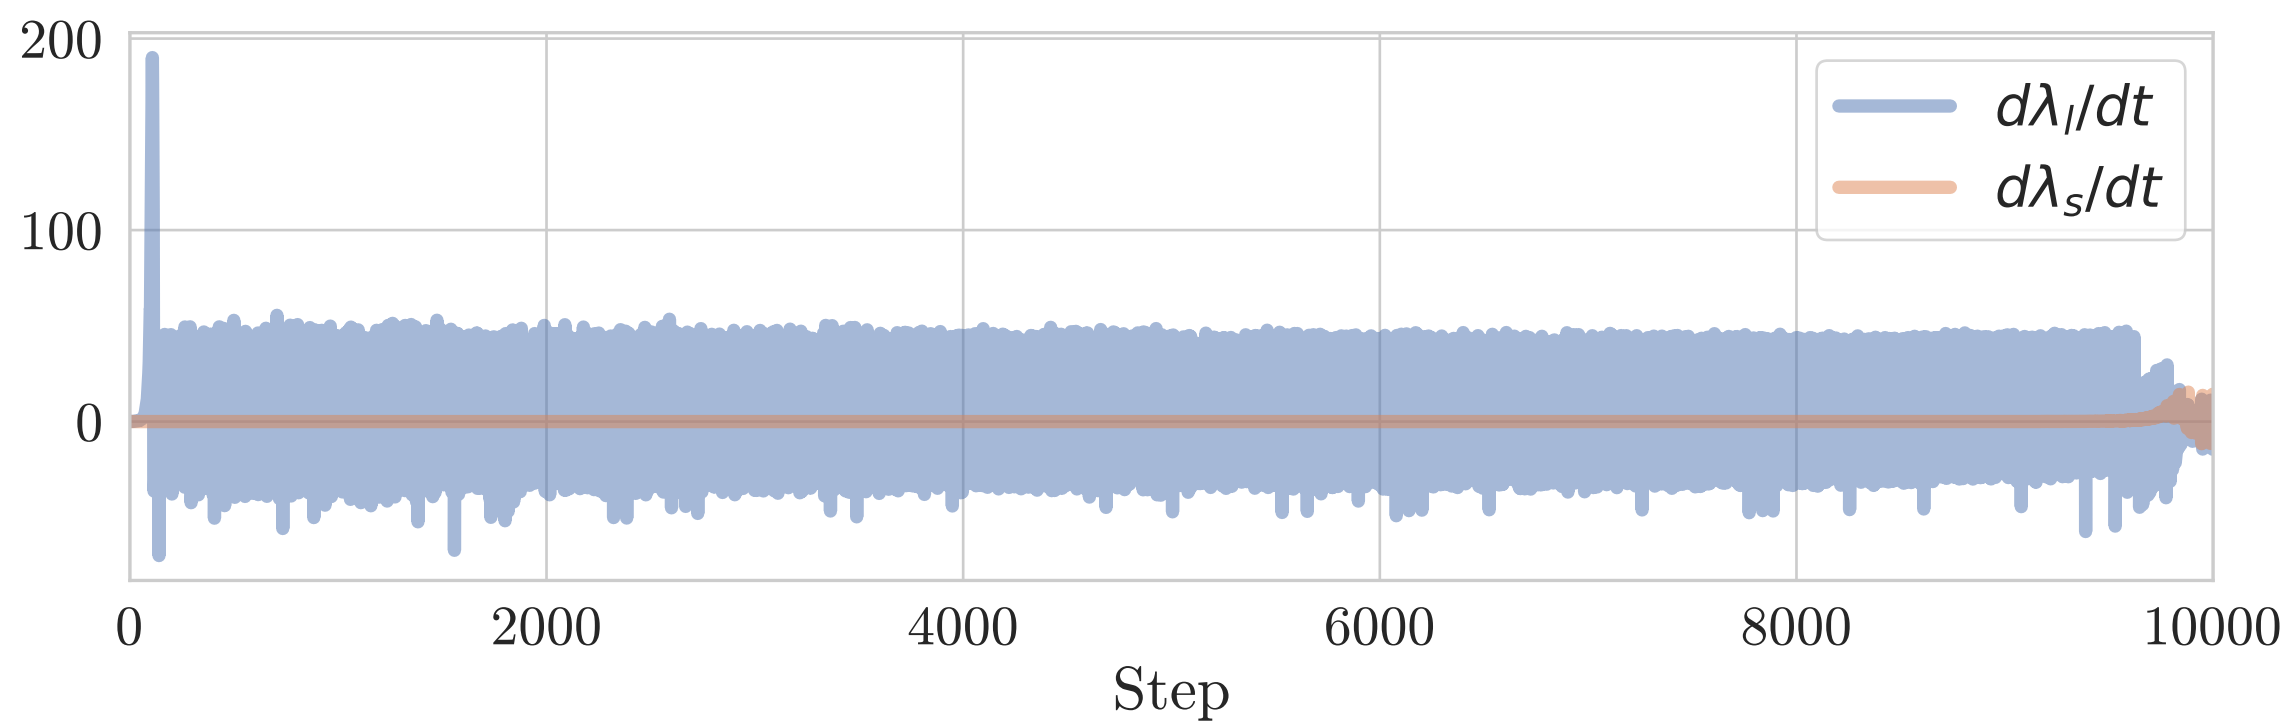

Supplement: supplementary_material [file dim_dcdt_dldt_1.pdf › iclr2026/iclr/feature_preference/theoretical/deep/figure/barlowtwins/dim_dcdt_dldt_1.pdf]

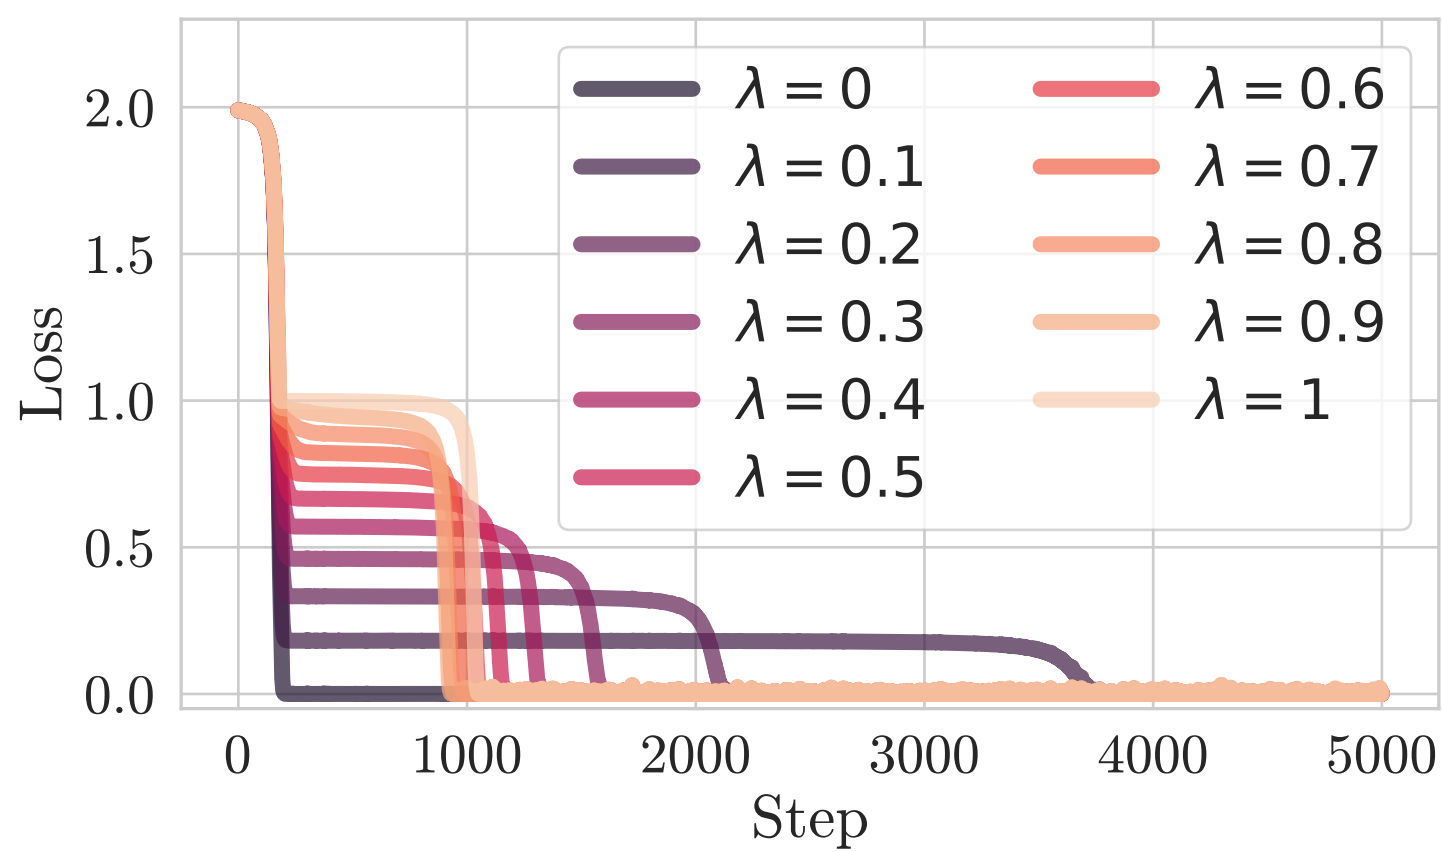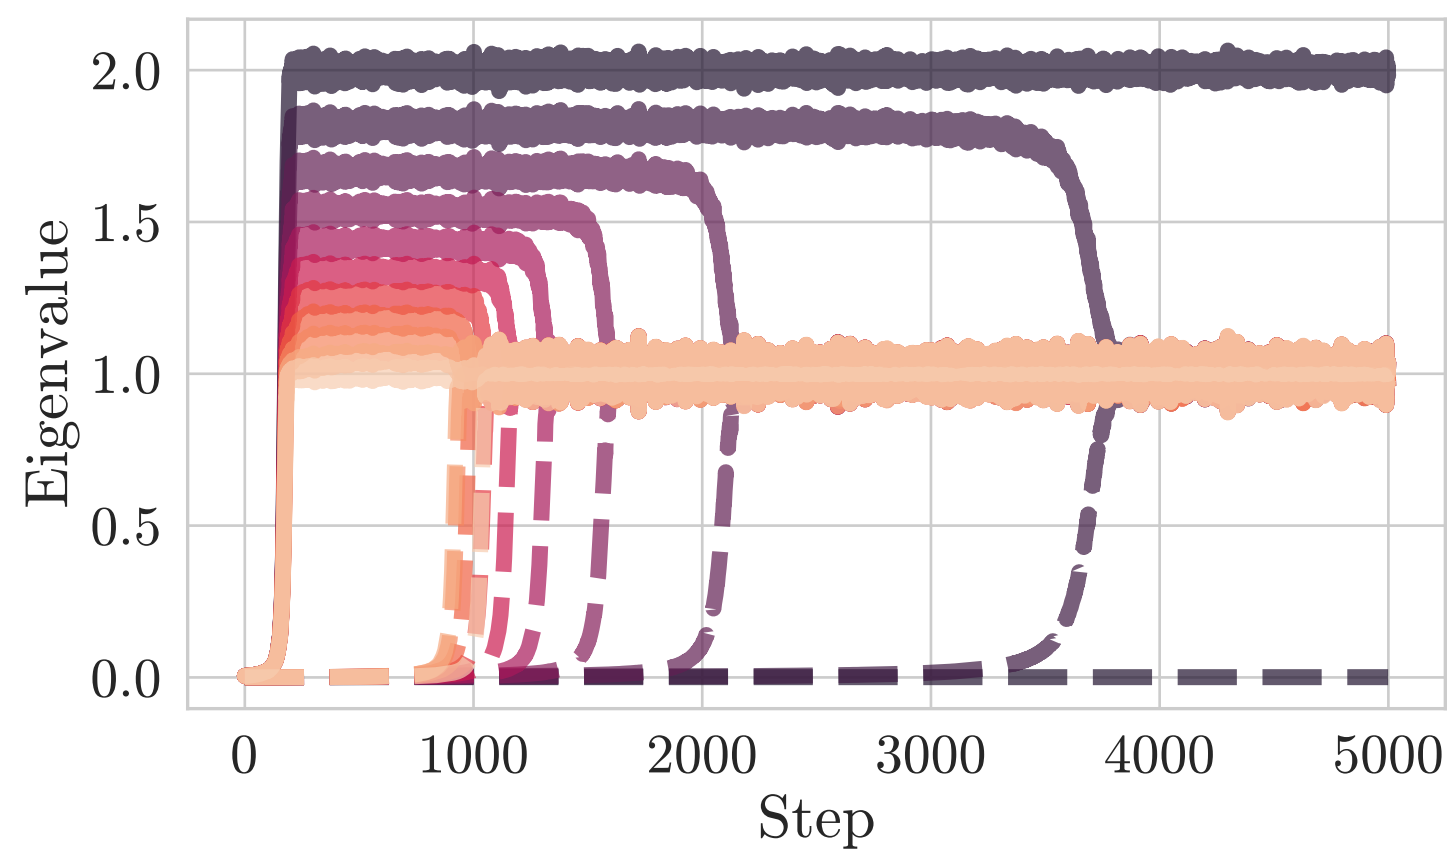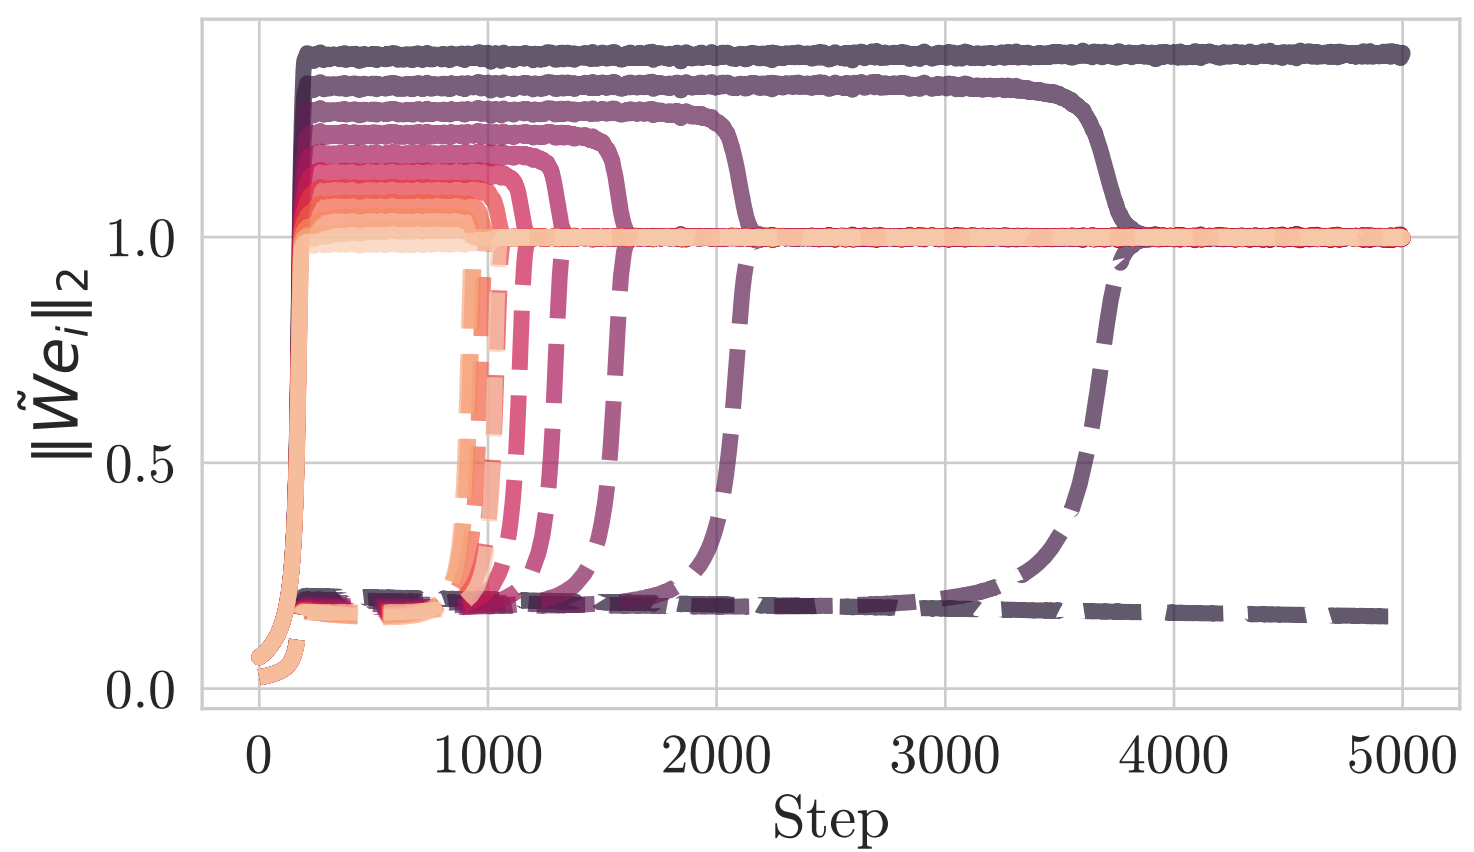

Supplement: supplementary_material [file dim_loss_eig_align.pdf › iclr2026/iclr/feature_preference/theoretical/deep/figure/barlowtwins/dim_loss_eig_align.pdf]

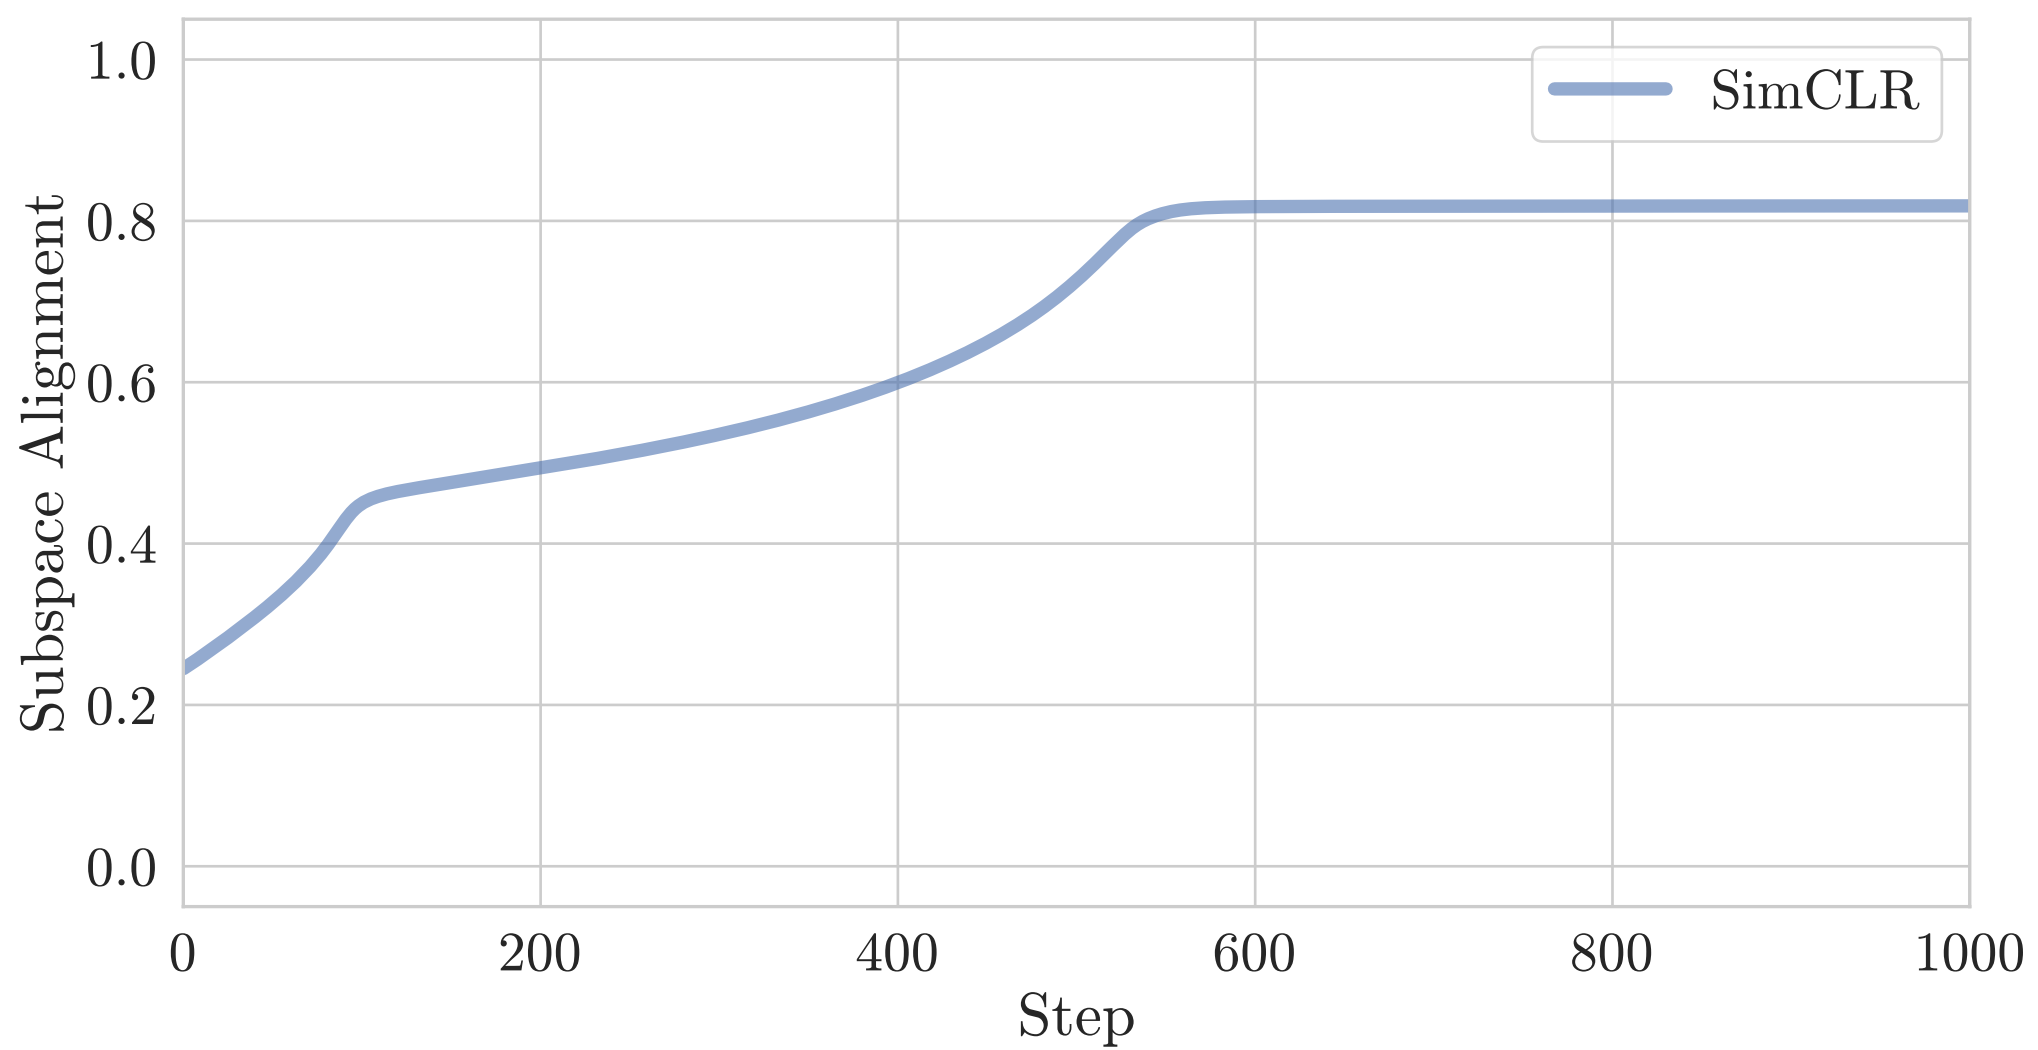

Supplement: supplementary_material [file dim_alignment.pdf › iclr2026/iclr/feature_preference/theoretical/deep/figure/simclr/dim_alignment.pdf]

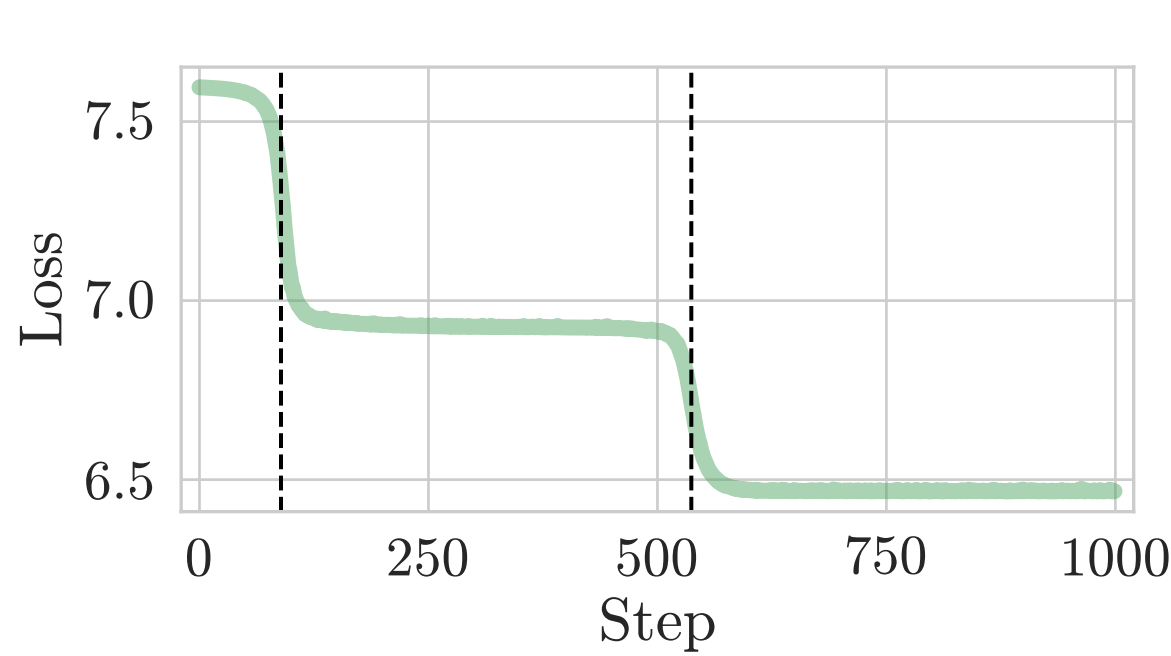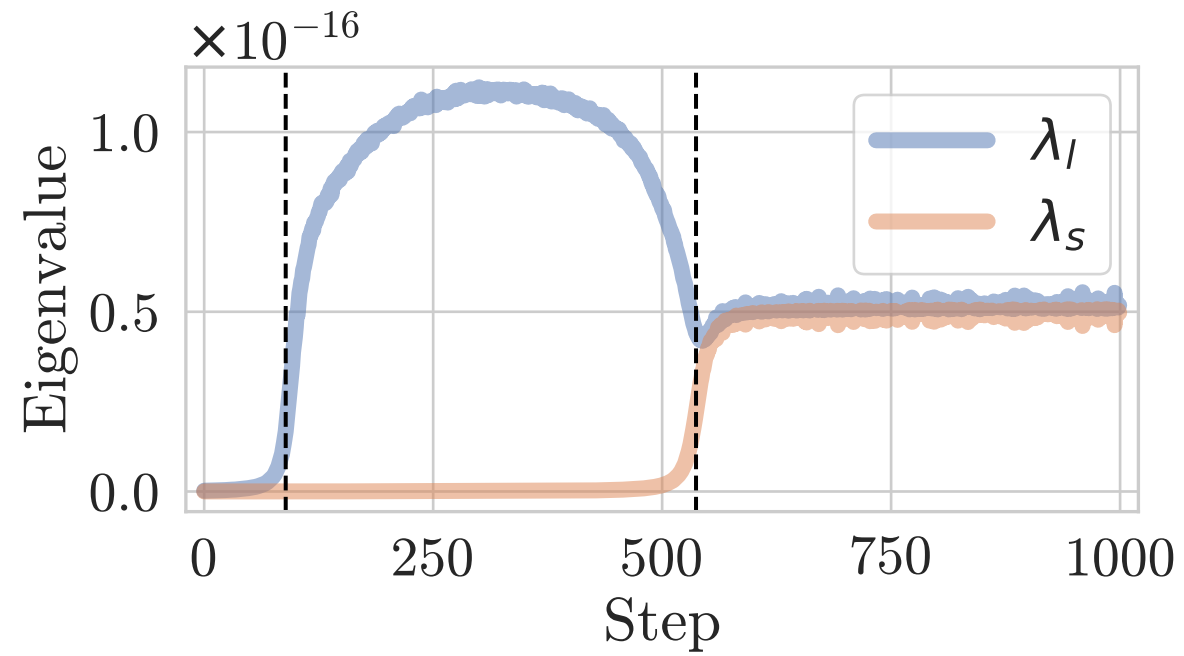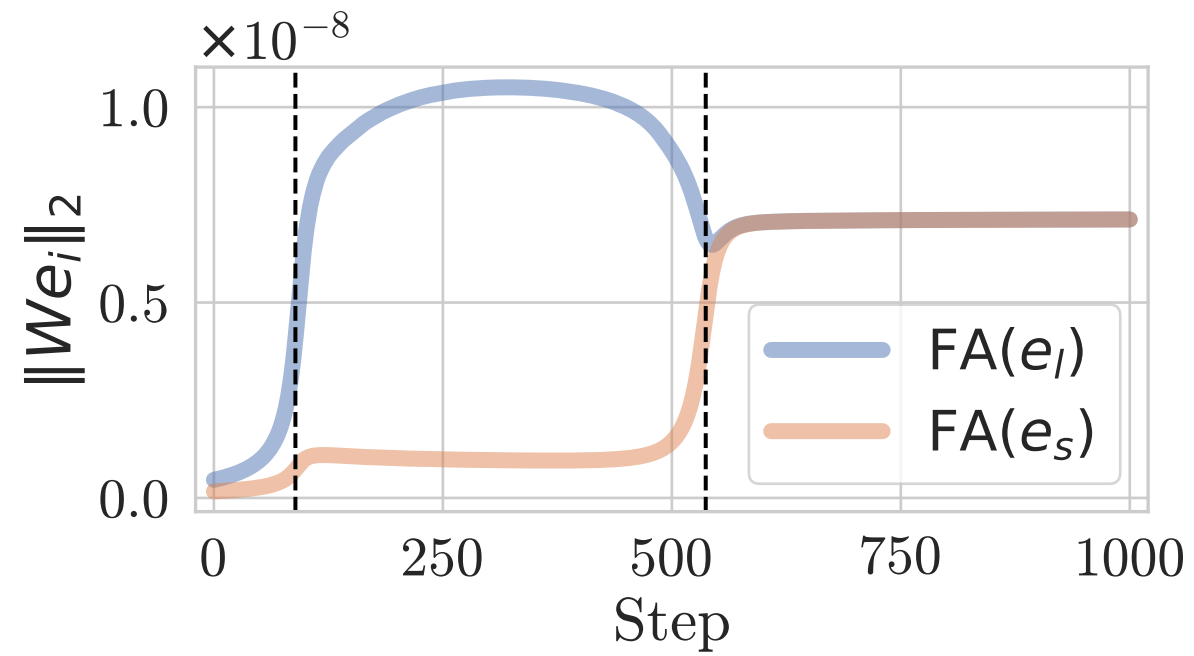

Supplement: supplementary_material [file dim_loss_eig_align.pdf › iclr2026/iclr/feature_preference/theoretical/deep/figure/simclr/dim_loss_eig_align.pdf]

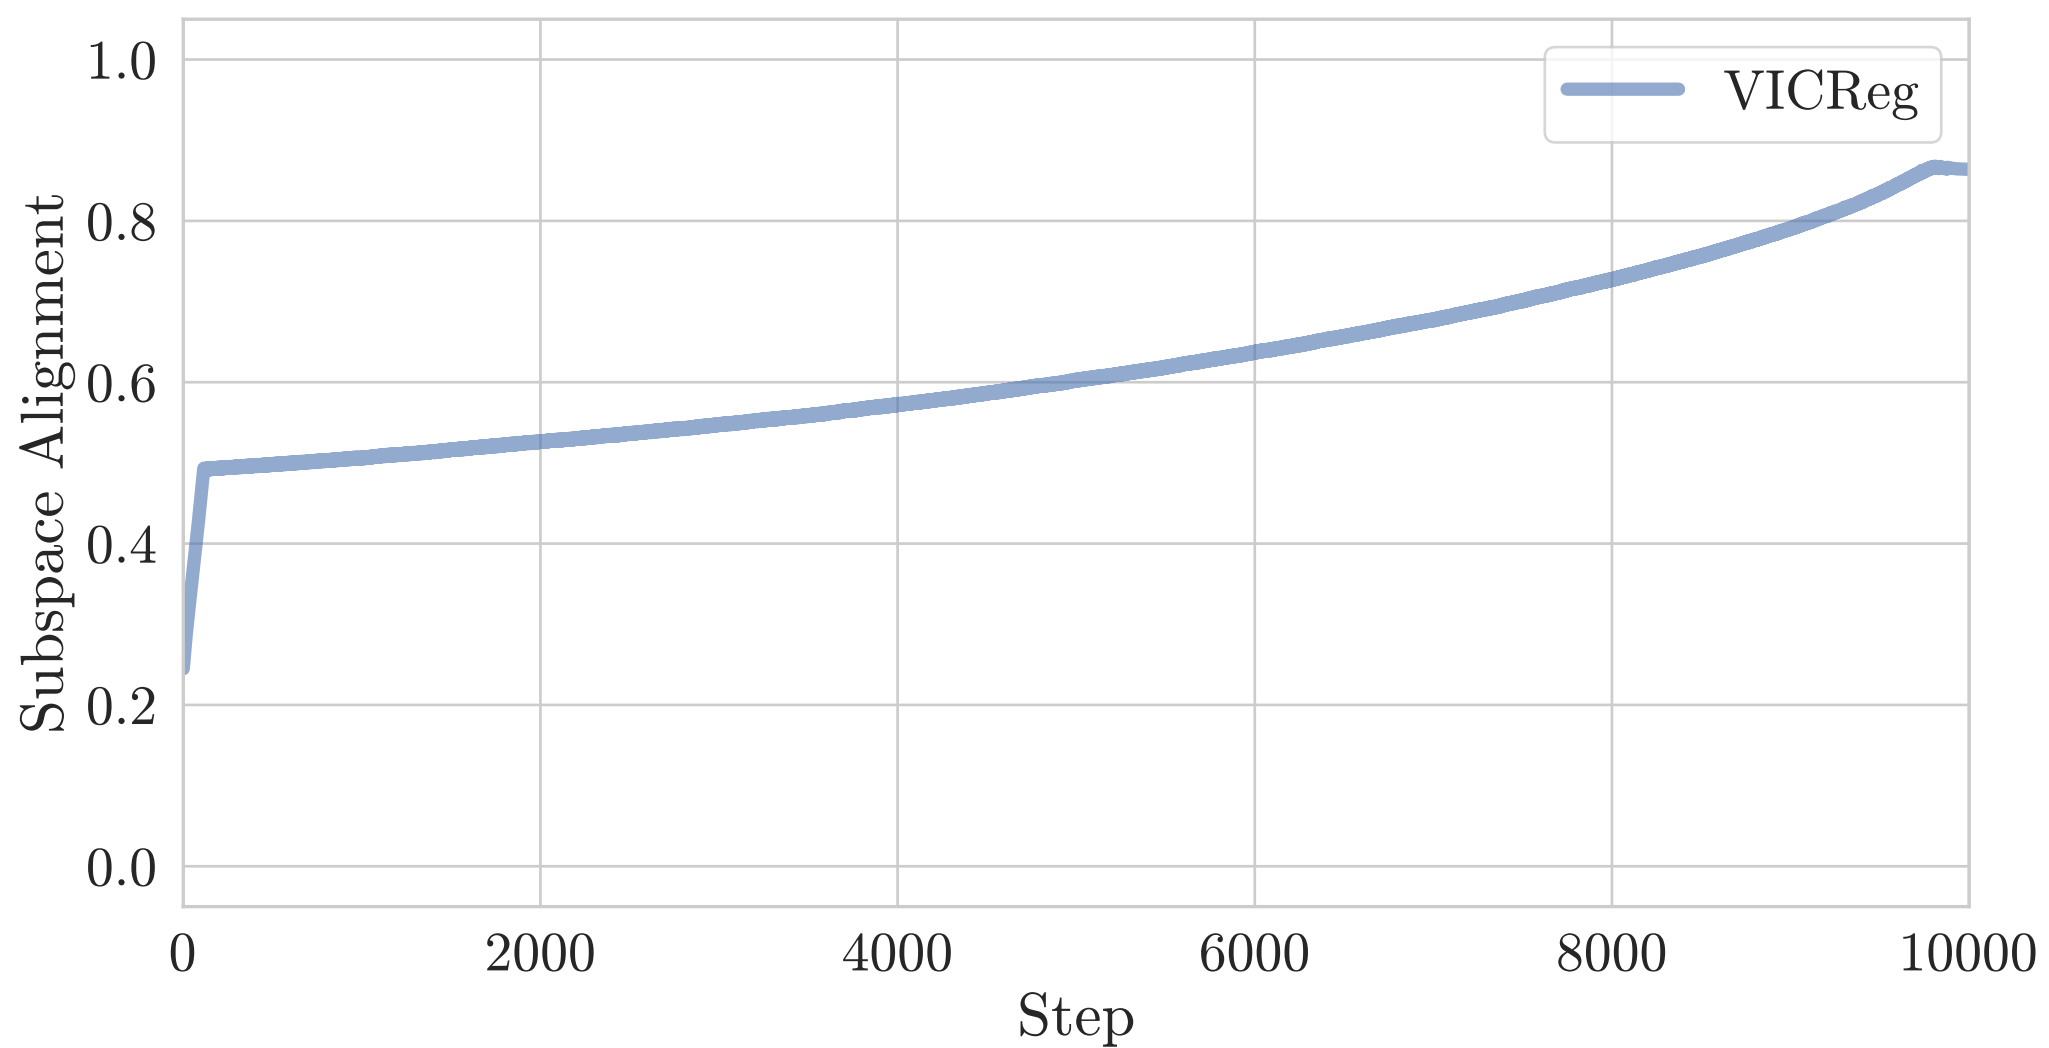

Supplement: supplementary_material [file dim_alignment.pdf › iclr2026/iclr/feature_preference/theoretical/deep/figure/vicreg/dim_alignment.pdf]

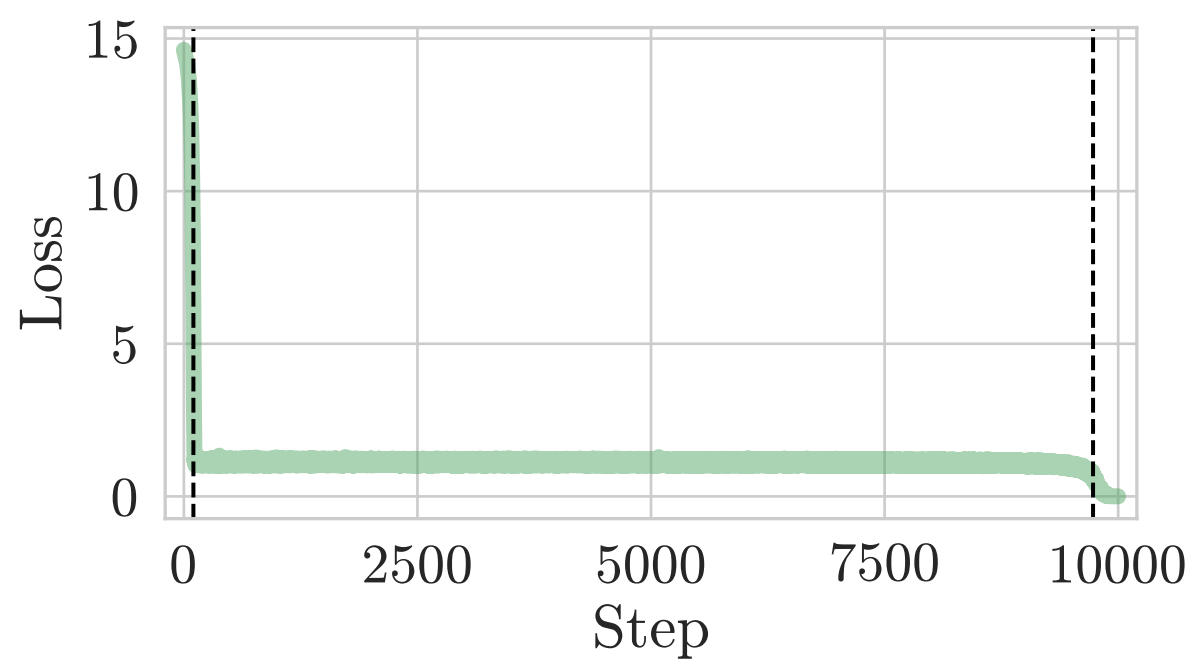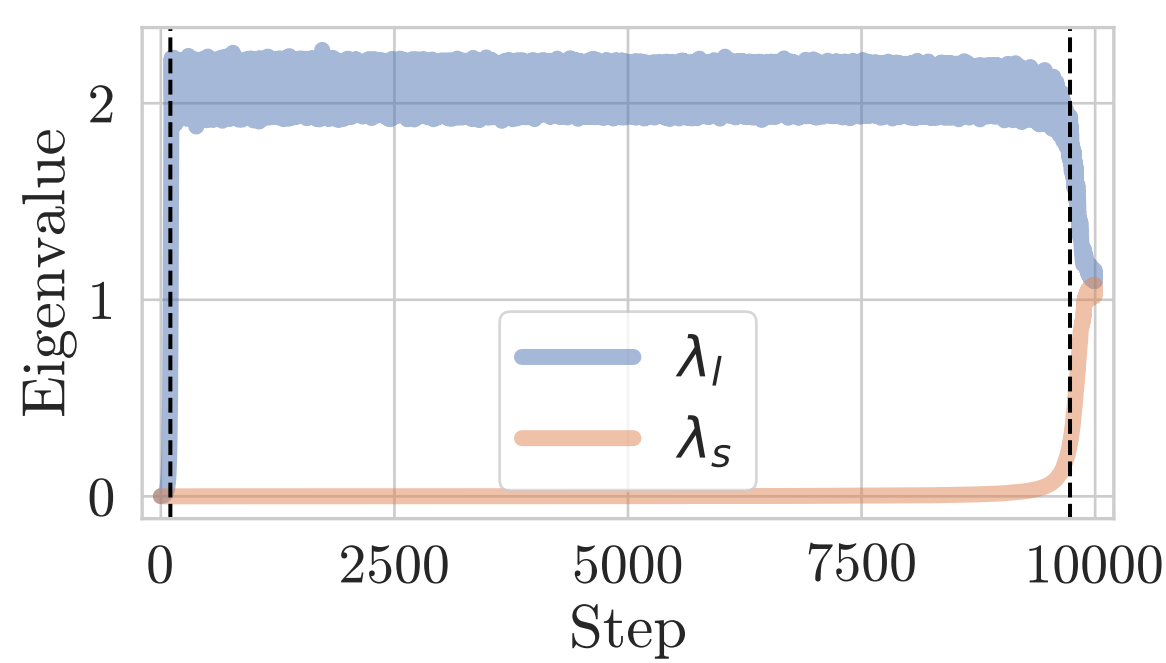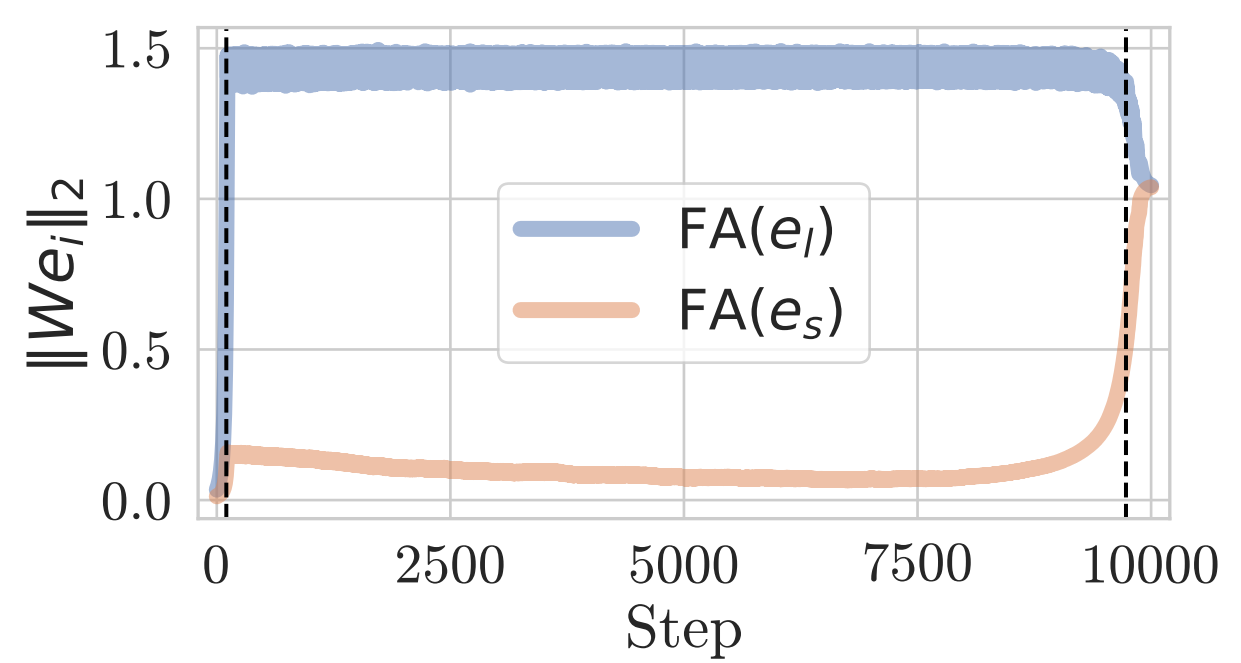

Supplement: supplementary_material [file dim_loss_eig_align.pdf › iclr2026/iclr/feature_preference/theoretical/deep/figure/vicreg/dim_loss_eig_align.pdf]

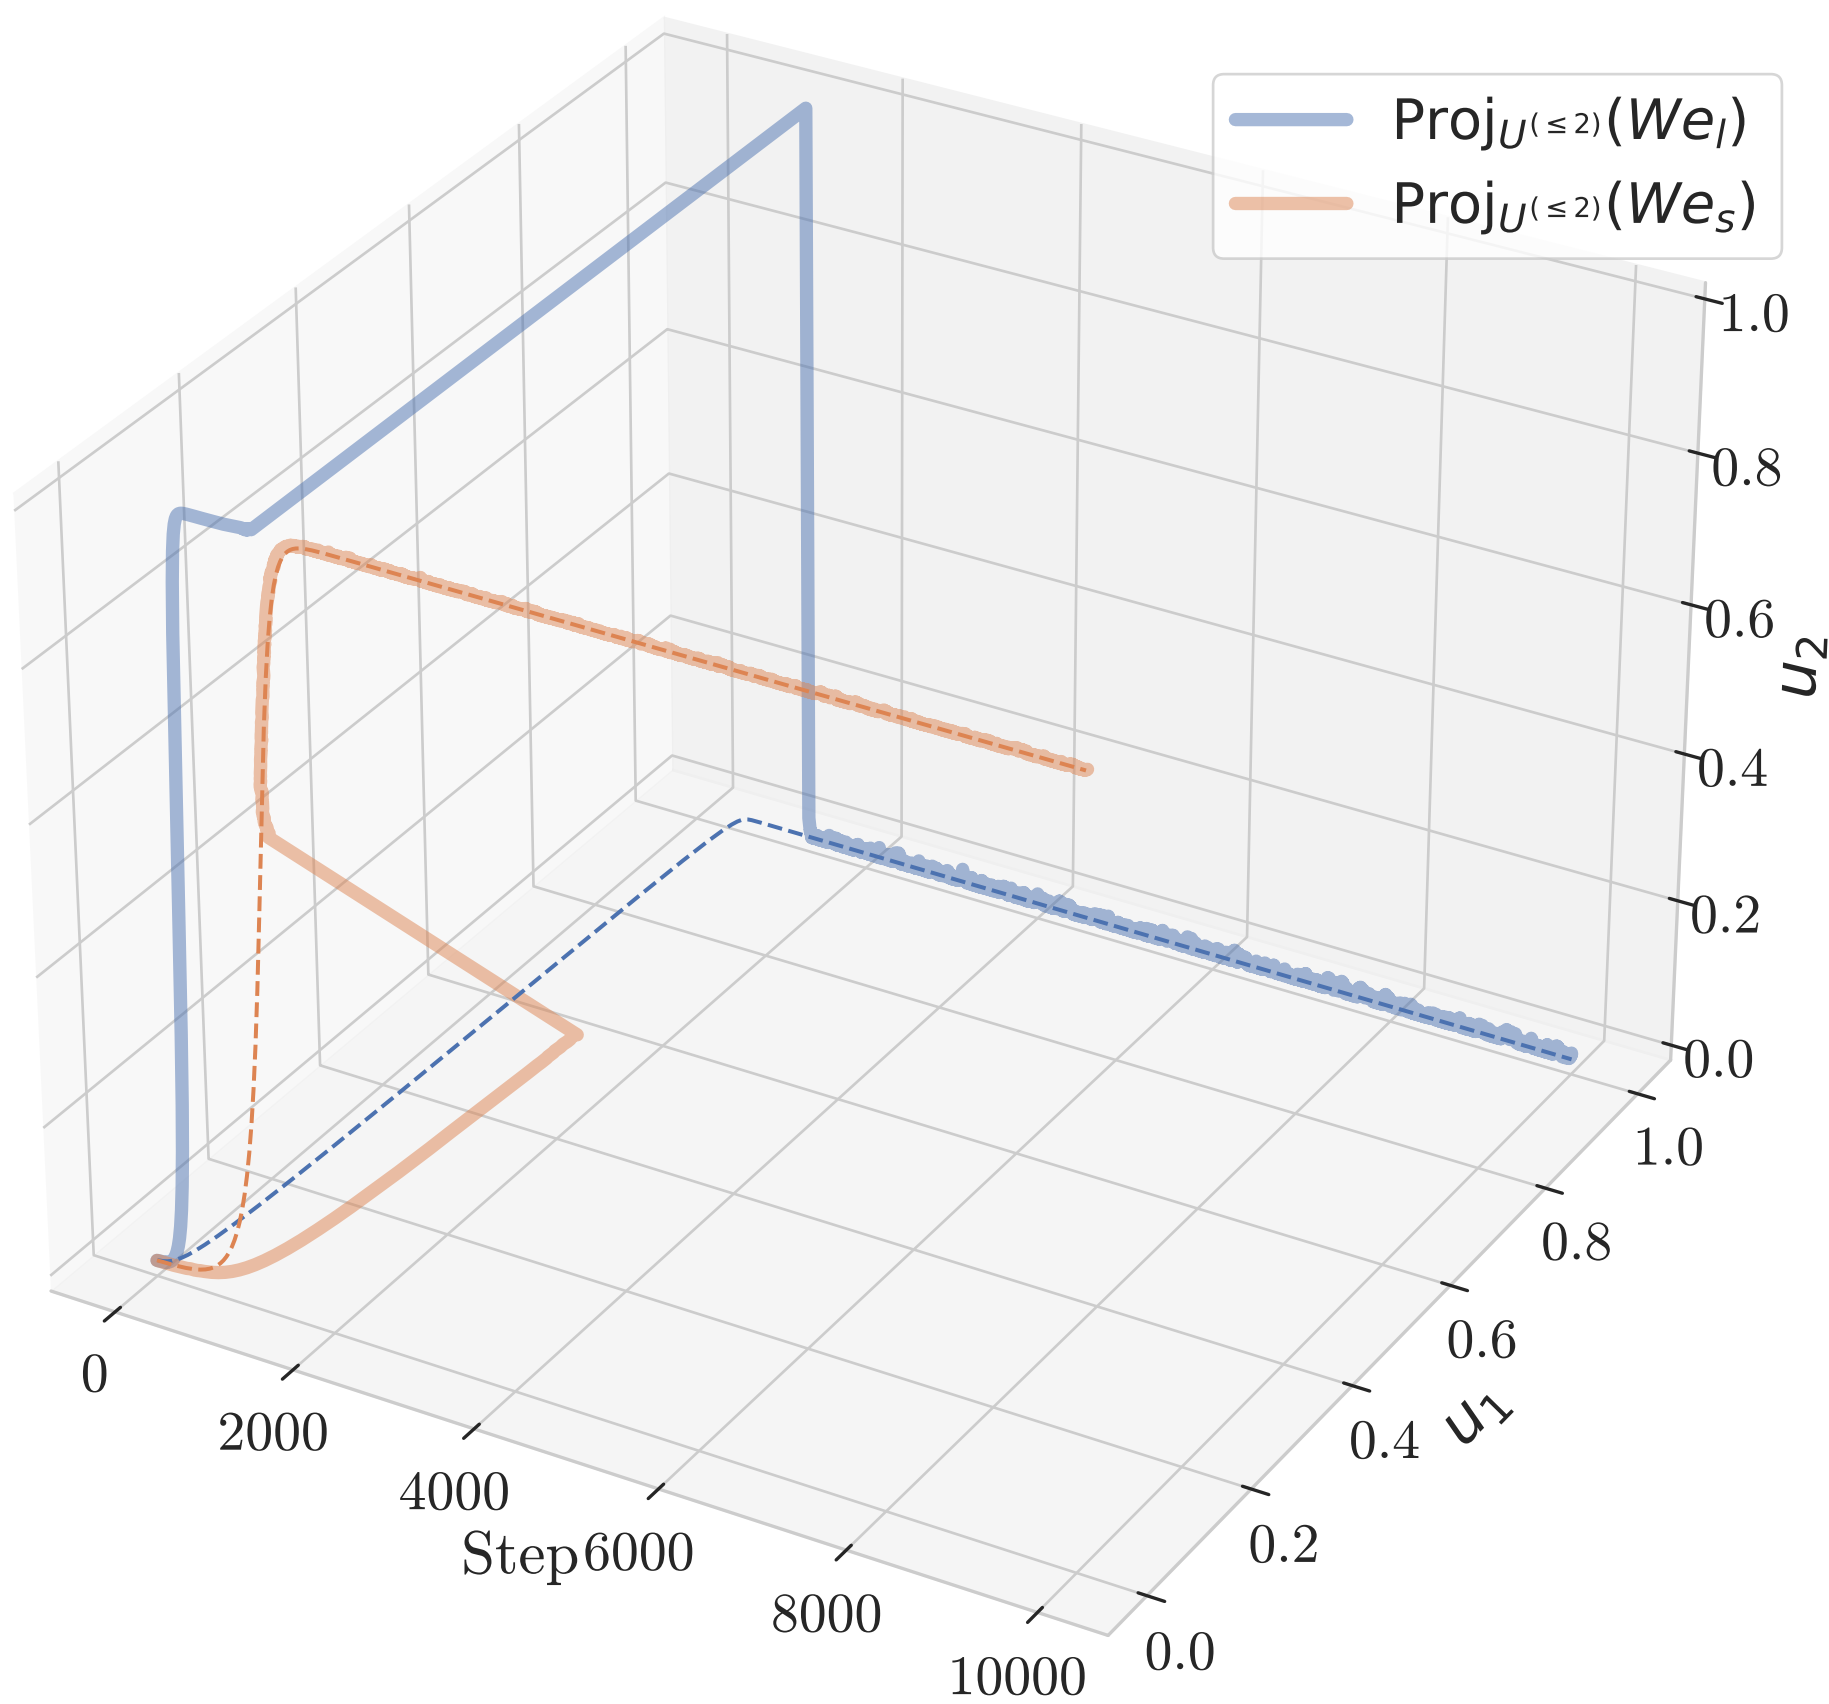

Supplement: supplementary_material [file dim_3d.pdf › iclr2026/iclr/feature_preference/theoretical/linear/figure/barlowtwins/dim_3d.pdf]

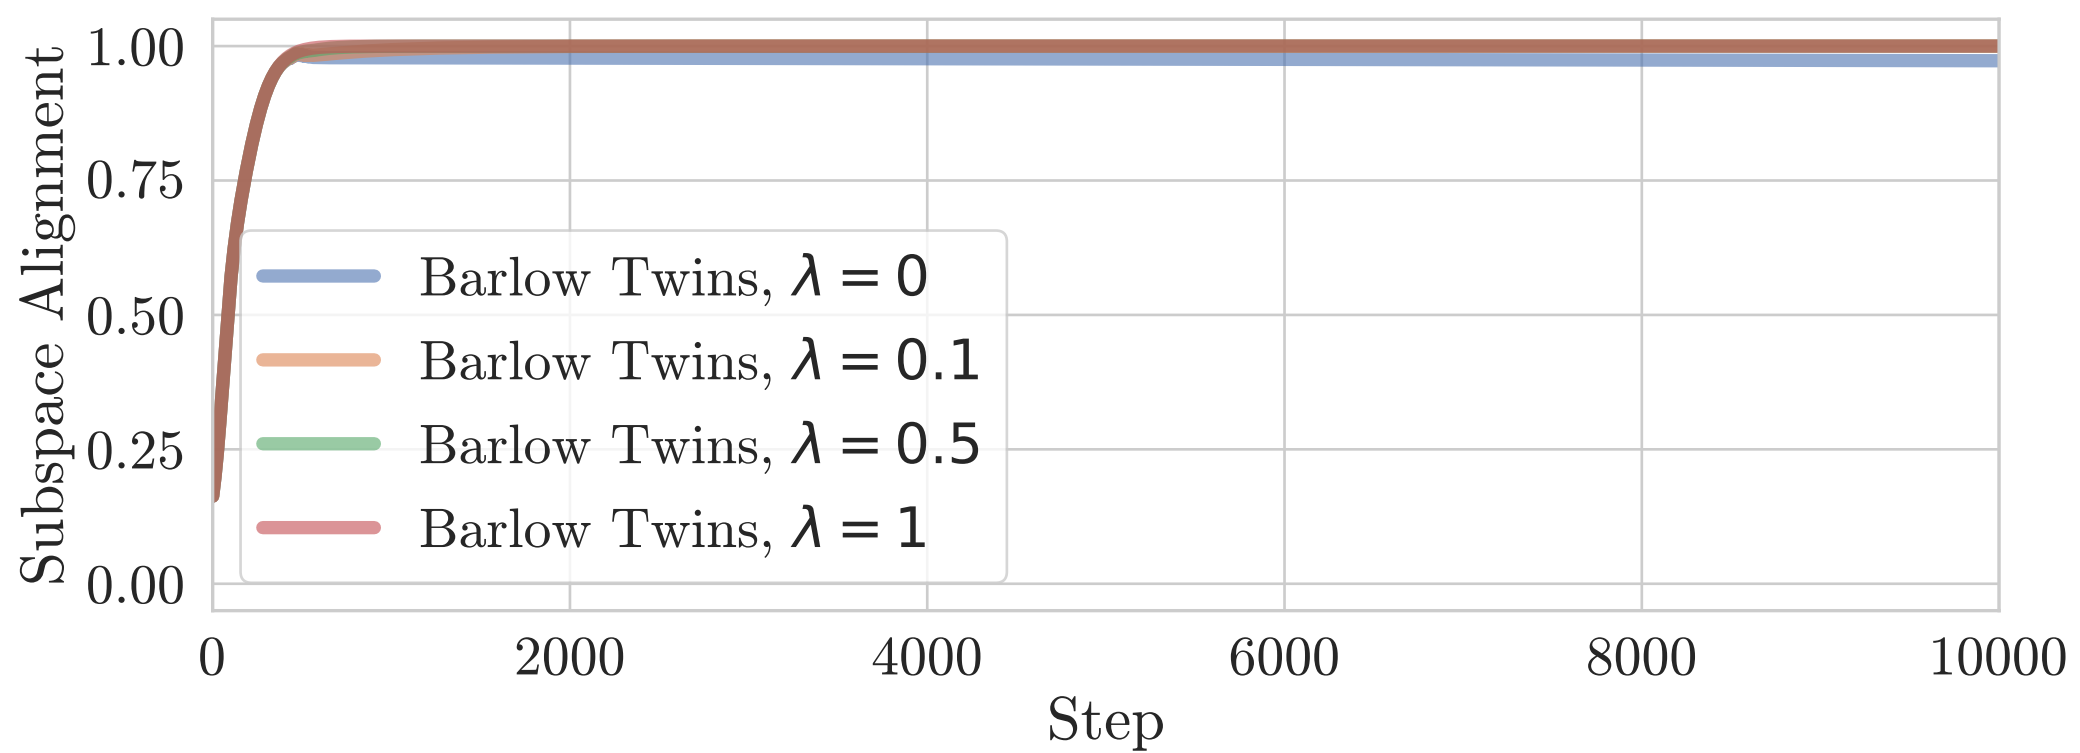

Supplement: supplementary_material [file dim_alignment.pdf › iclr2026/iclr/feature_preference/theoretical/linear/figure/barlowtwins/dim_alignment.pdf]

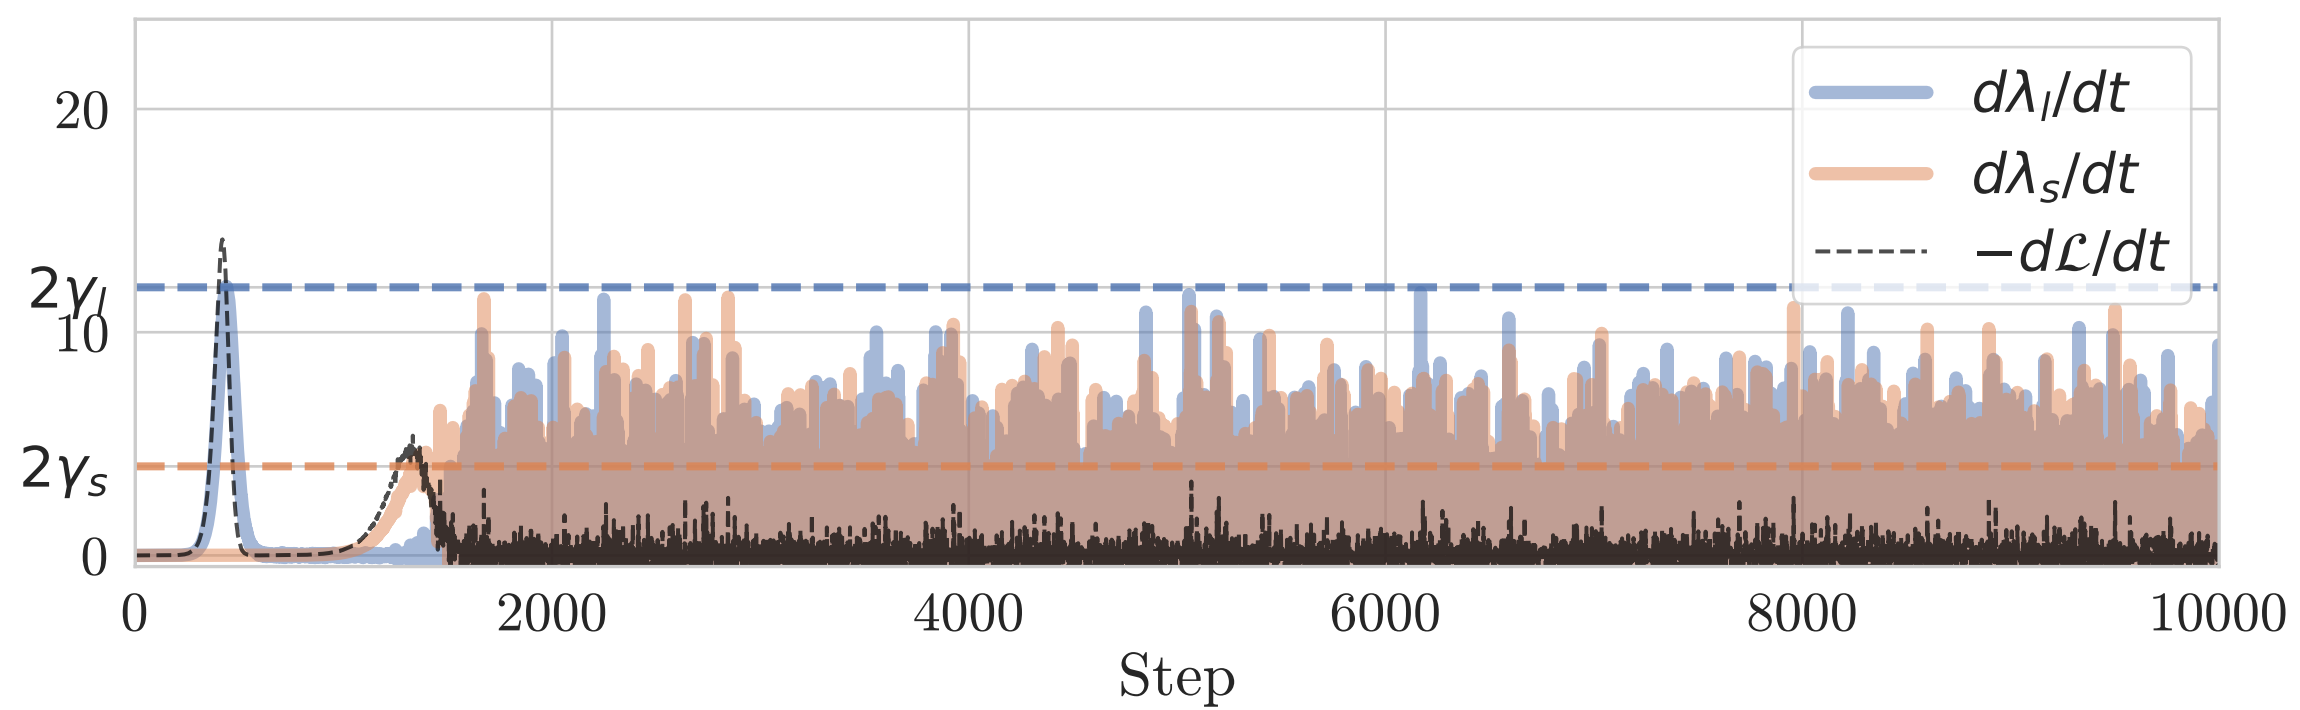

Supplement: supplementary_material [file dim_dcdt_dldt.pdf › iclr2026/iclr/feature_preference/theoretical/linear/figure/barlowtwins/dim_dcdt_dldt.pdf]

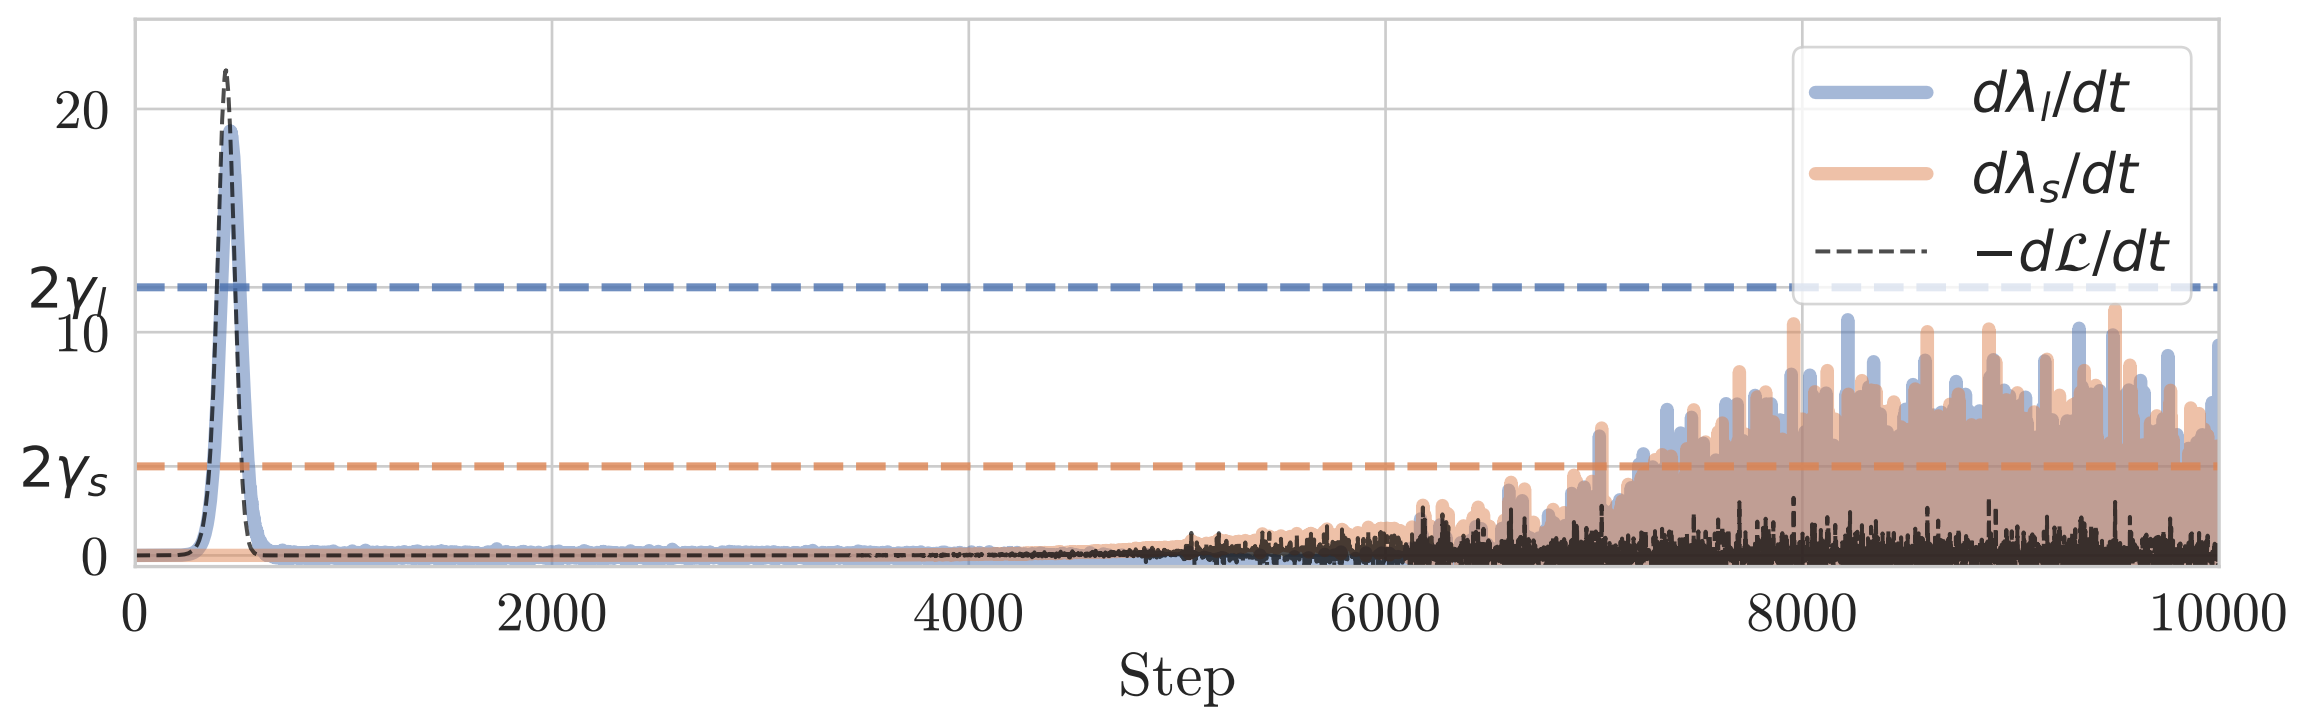

Supplement: supplementary_material [file dim_dcdt_dldt_0.1.pdf › iclr2026/iclr/feature_preference/theoretical/linear/figure/barlowtwins/dim_dcdt_dldt_0.1.pdf]

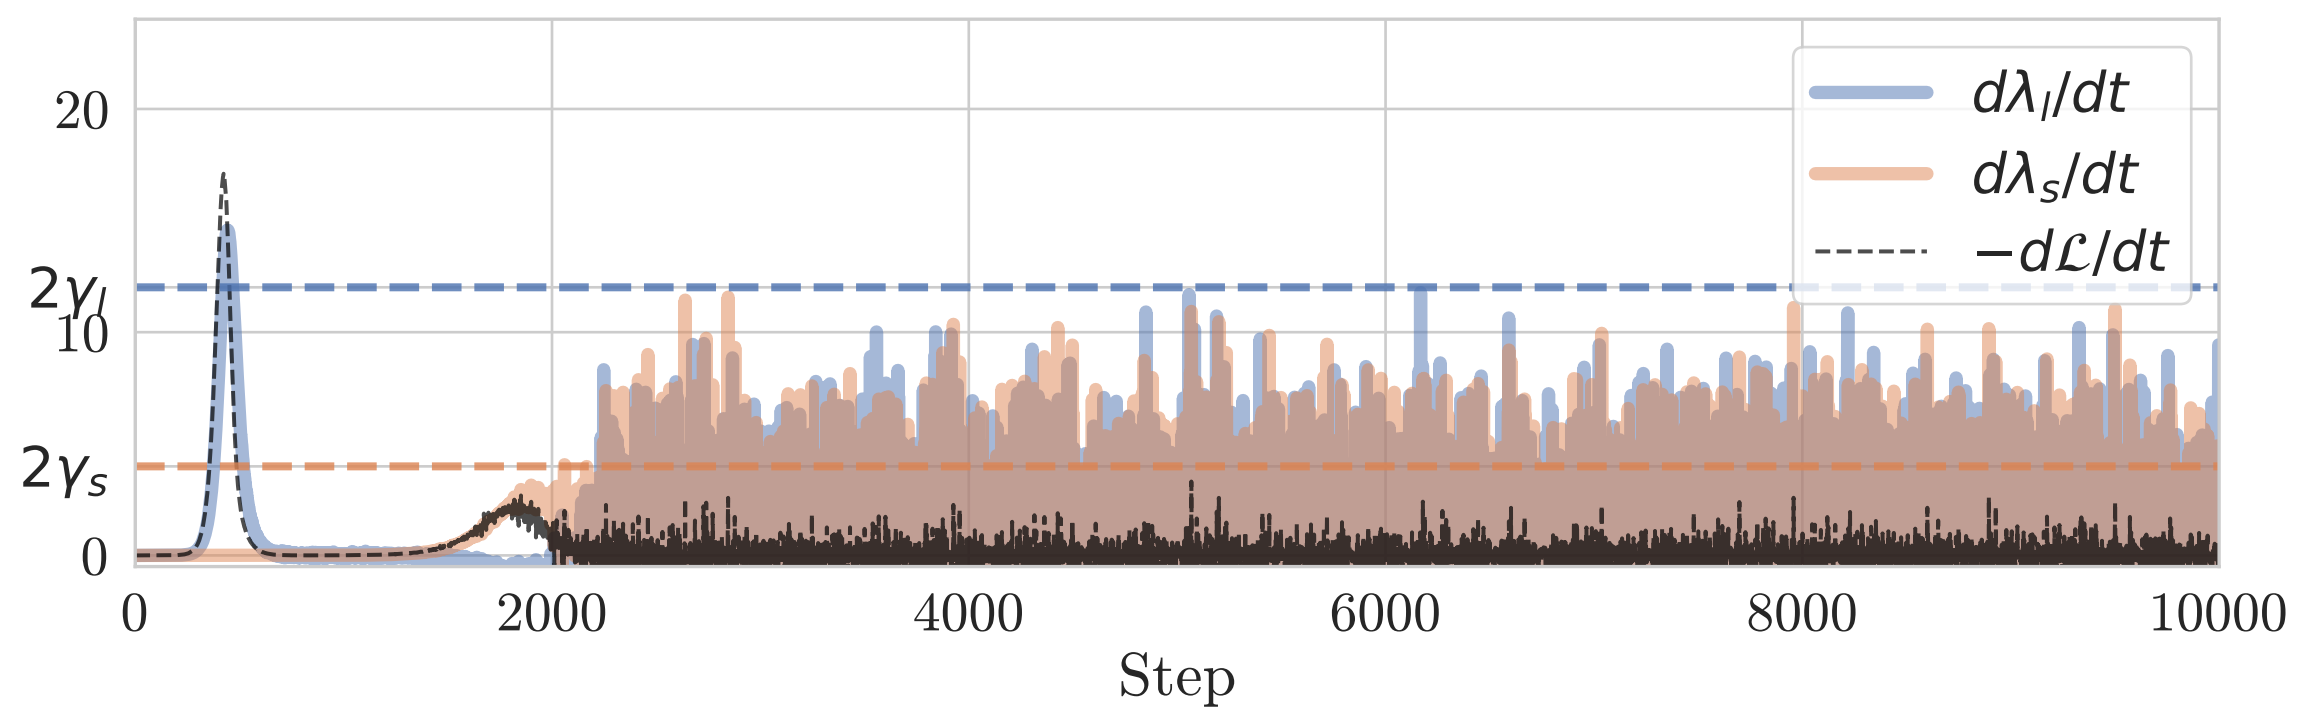

Supplement: supplementary_material [file dim_dcdt_dldt_0.5.pdf › iclr2026/iclr/feature_preference/theoretical/linear/figure/barlowtwins/dim_dcdt_dldt_0.5.pdf]

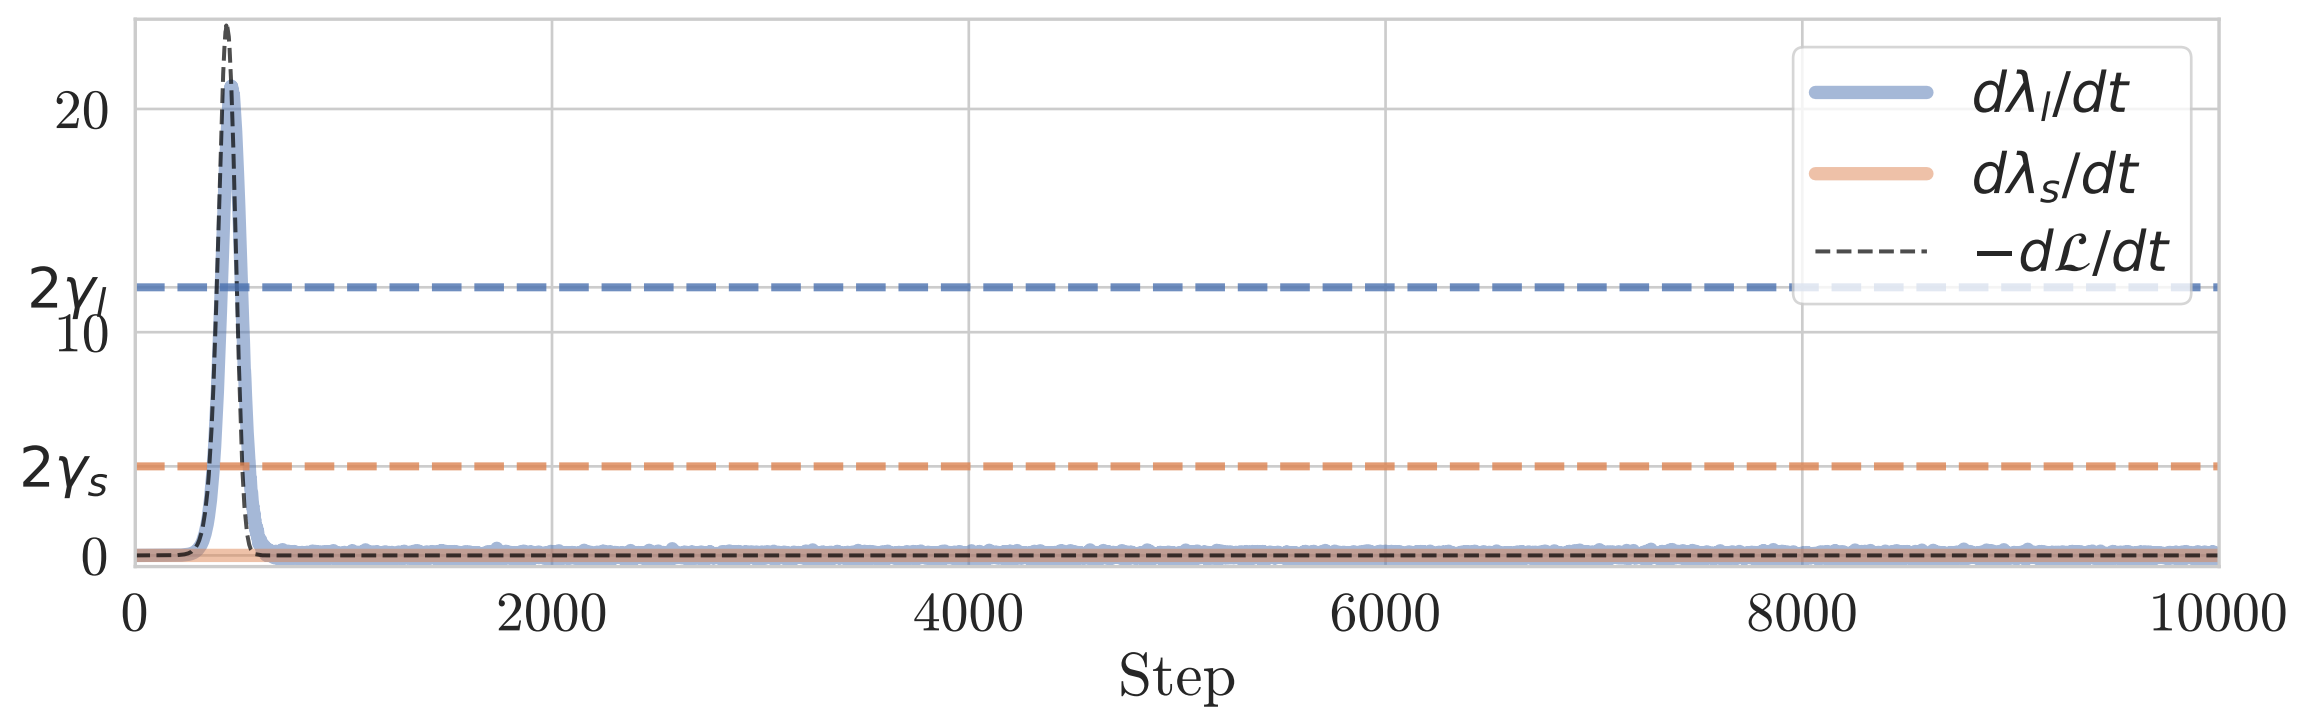

Supplement: supplementary_material [file dim_dcdt_dldt_0.pdf › iclr2026/iclr/feature_preference/theoretical/linear/figure/barlowtwins/dim_dcdt_dldt_0.pdf]

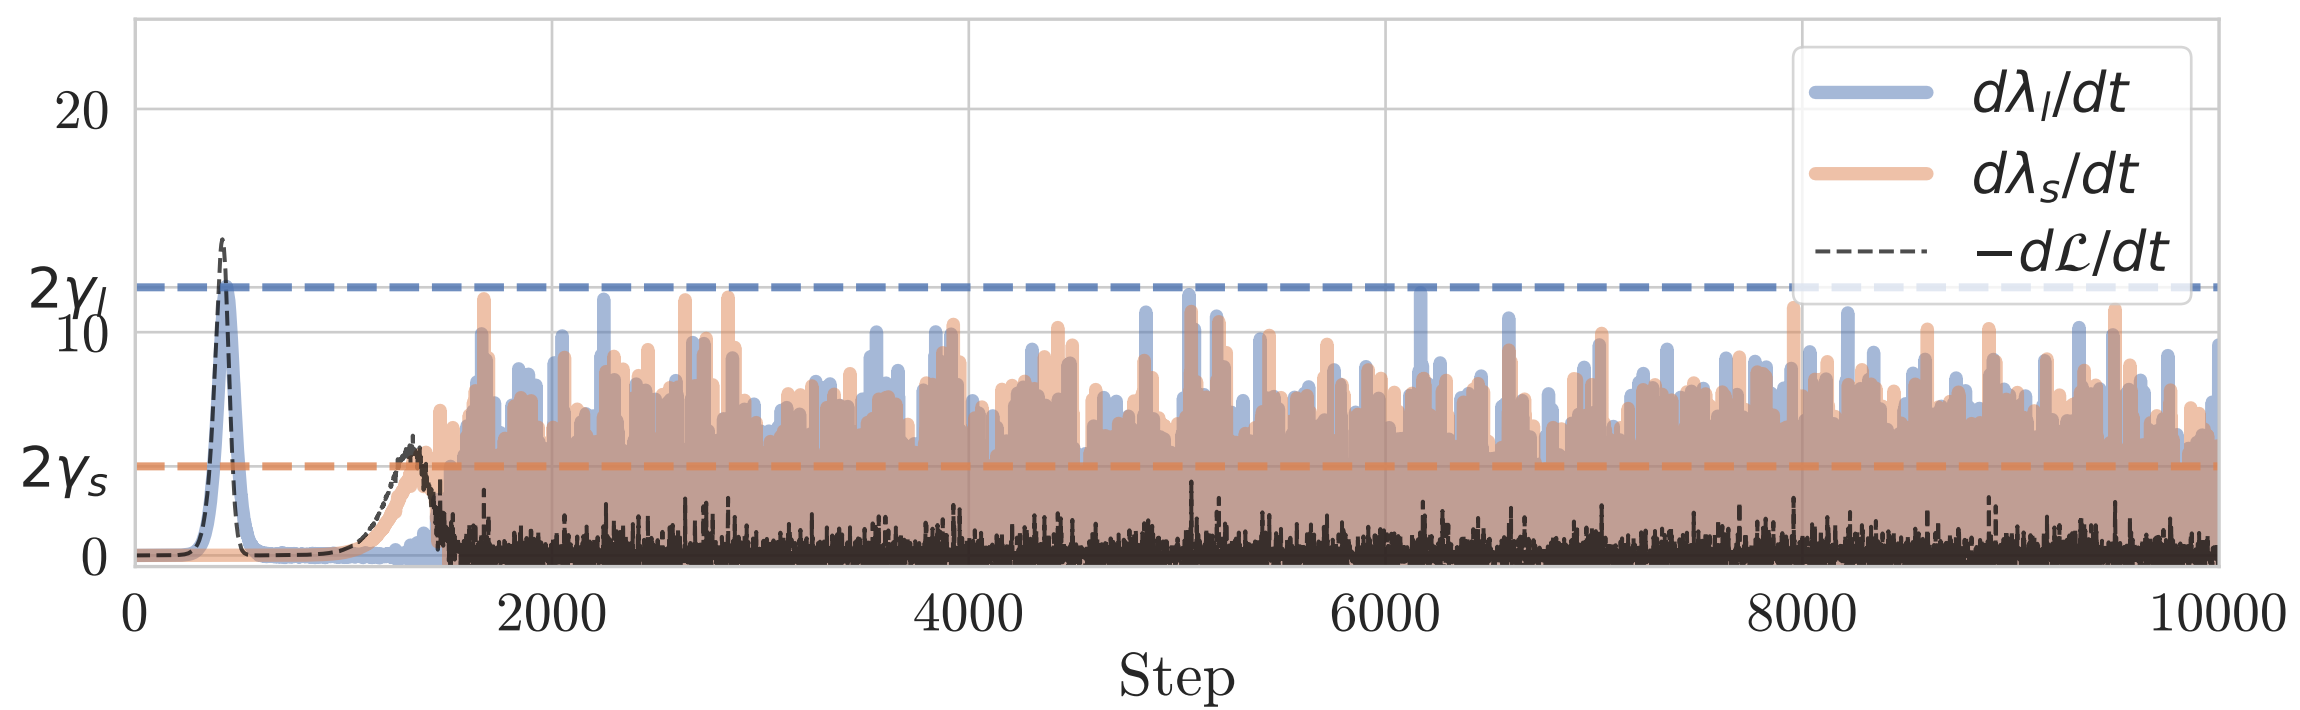

Supplement: supplementary_material [file dim_dcdt_dldt_1.pdf › iclr2026/iclr/feature_preference/theoretical/linear/figure/barlowtwins/dim_dcdt_dldt_1.pdf]

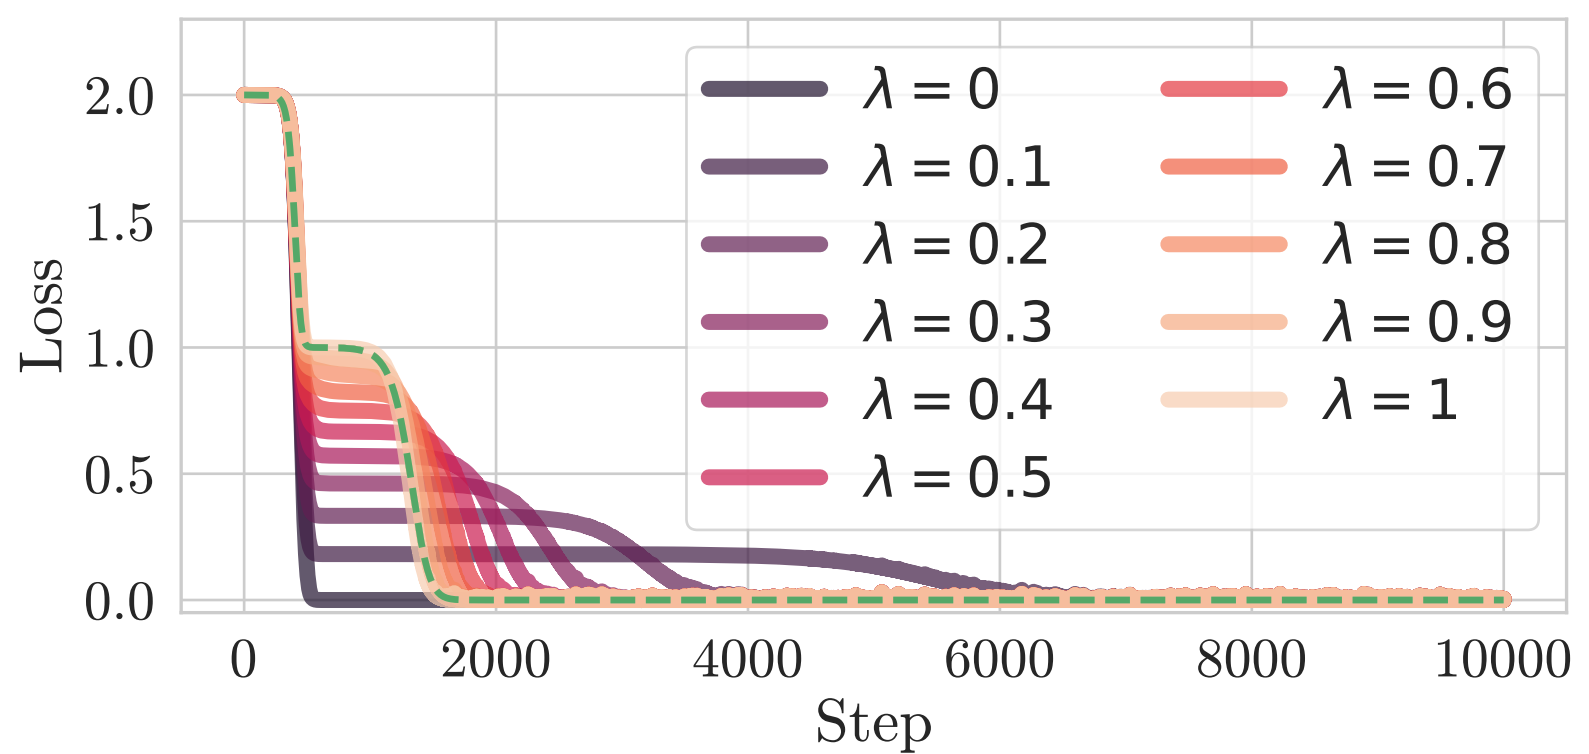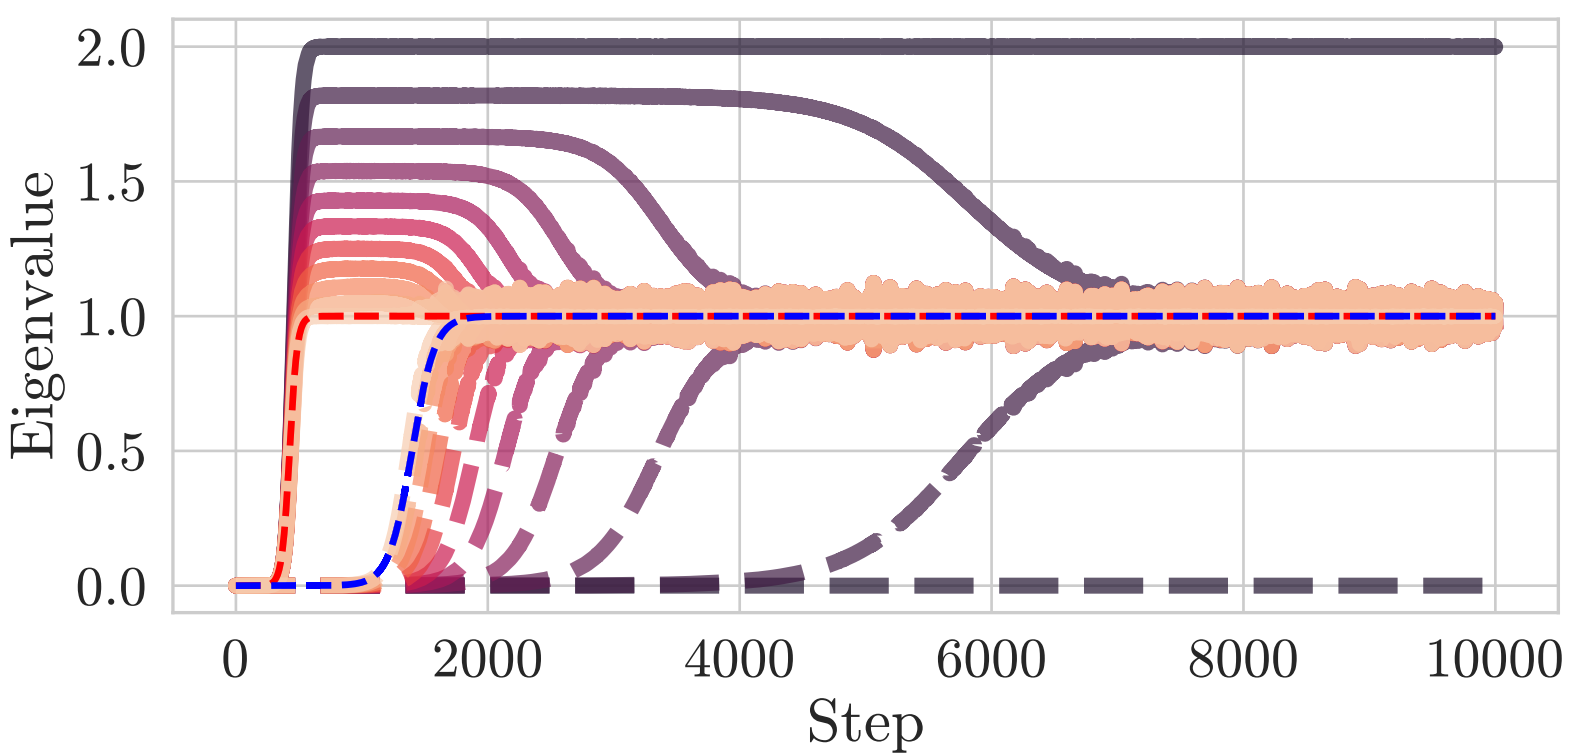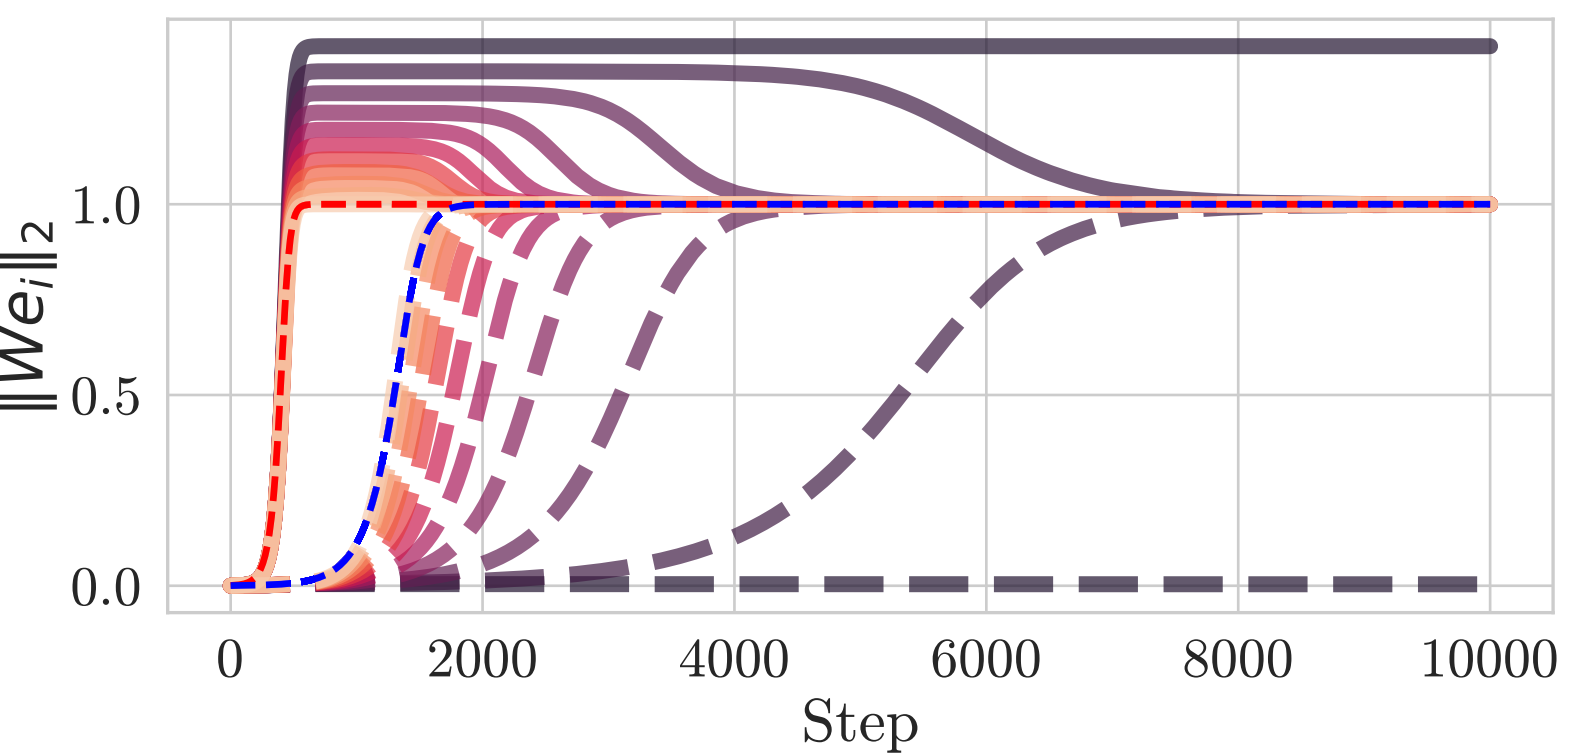

Supplement: supplementary_material [file loss_lambda_all.pdf › iclr2026/iclr/feature_preference/theoretical/linear/figure/barlowtwins/loss_lambda_all.pdf]

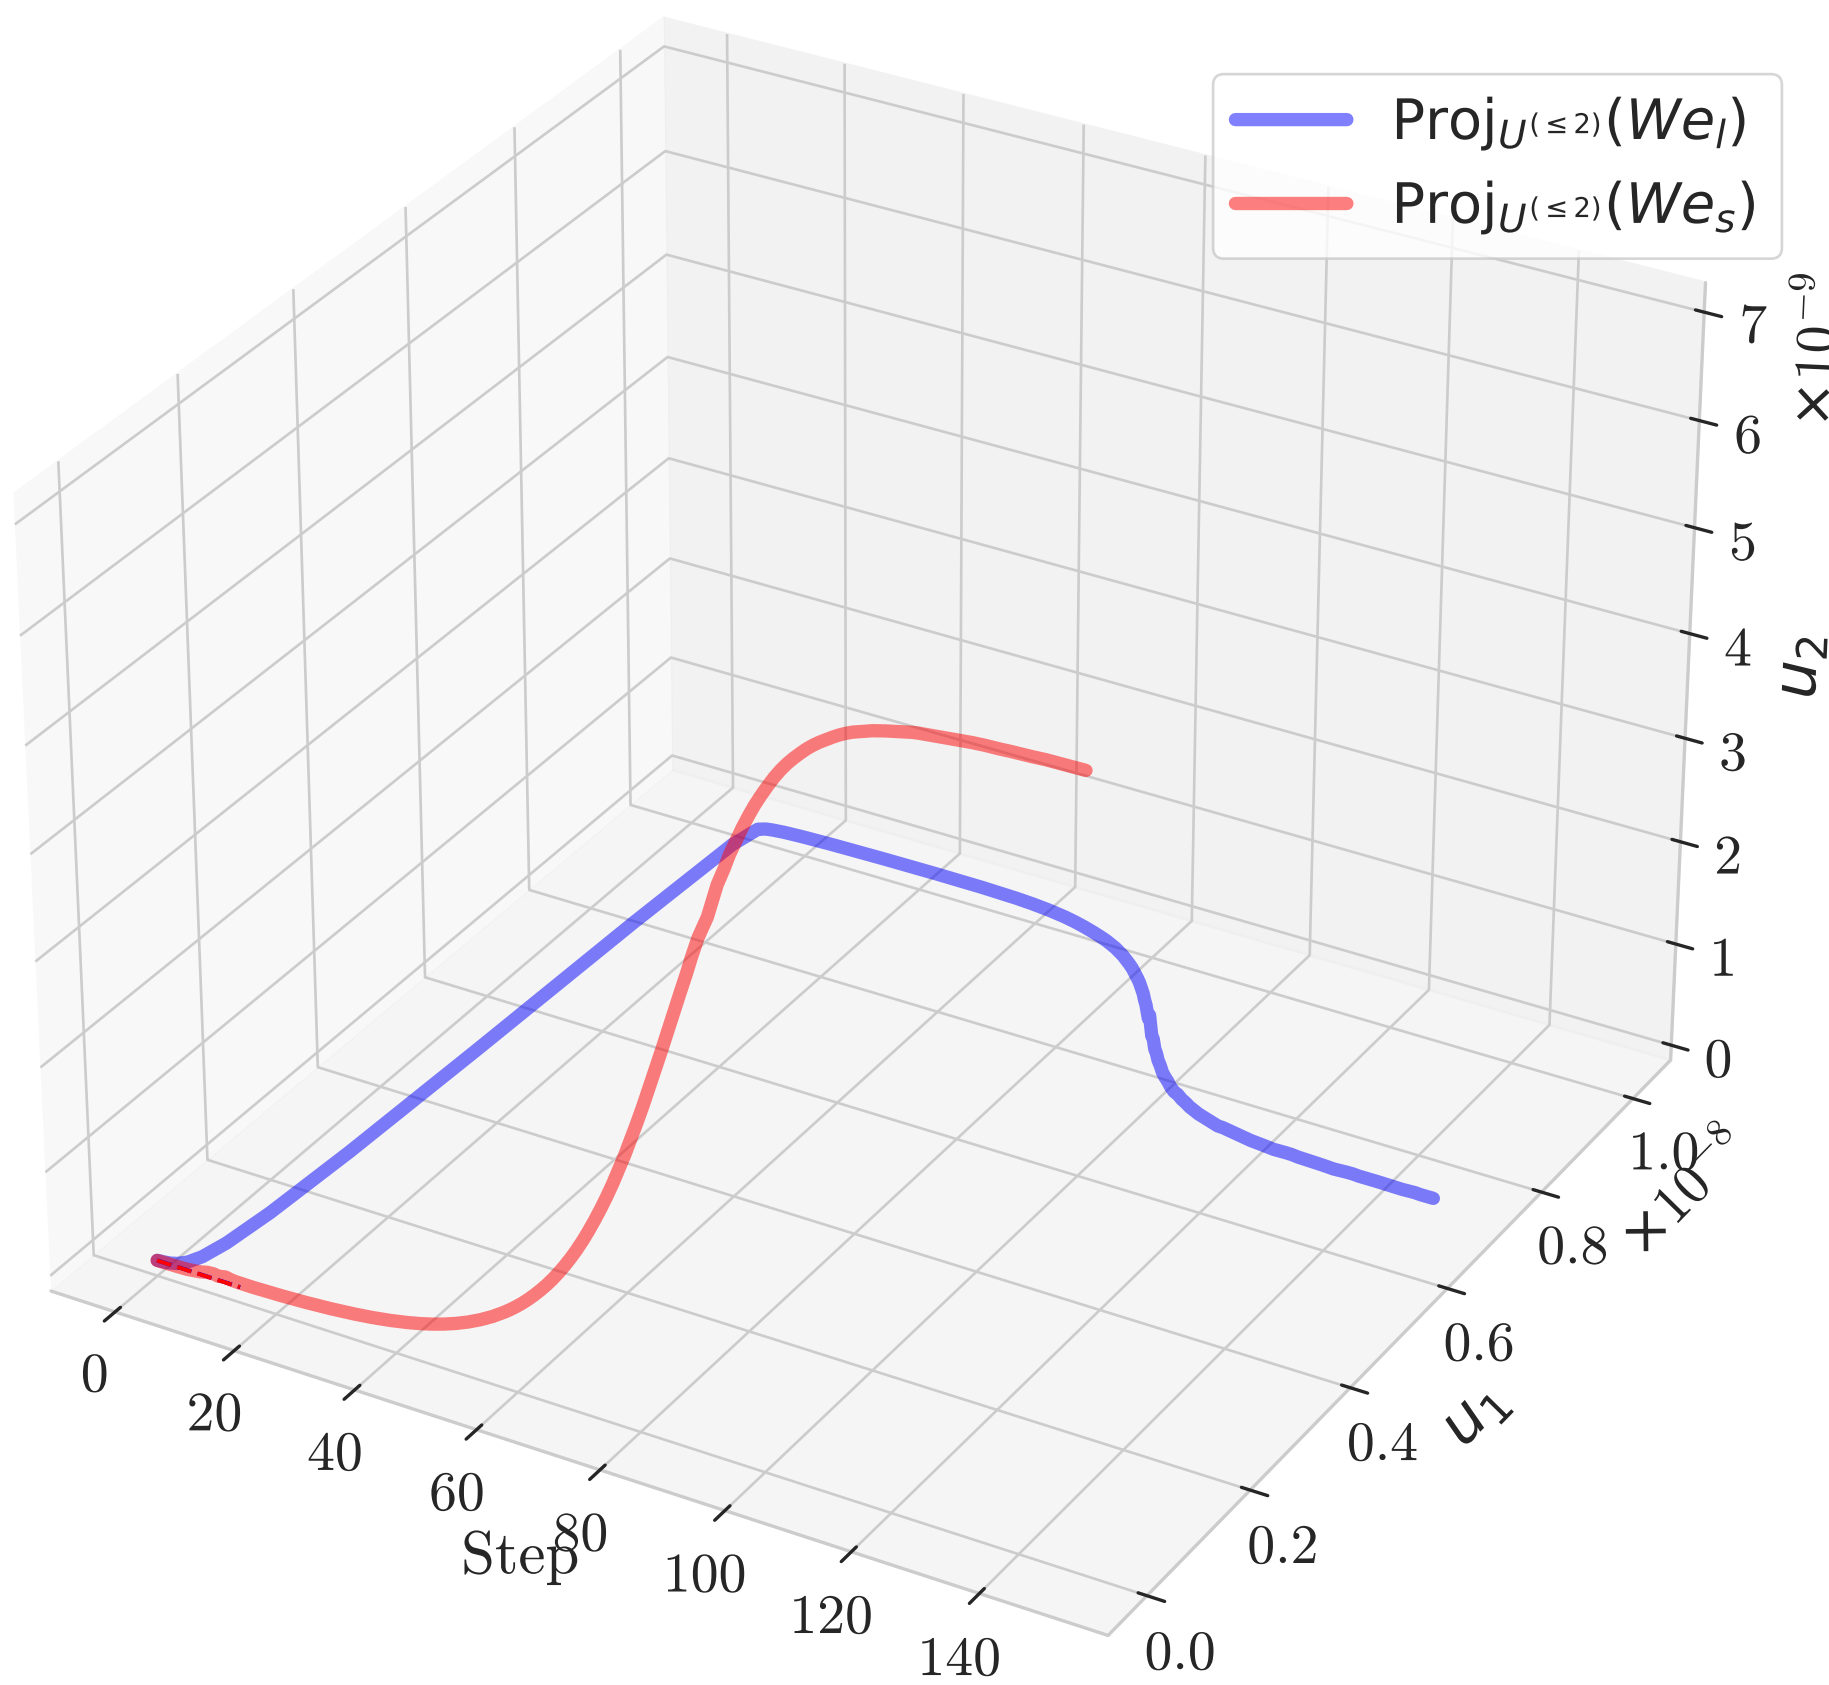

Supplement: supplementary_material [file dim_3d.pdf › iclr2026/iclr/feature_preference/theoretical/linear/figure/dim_3d.pdf]

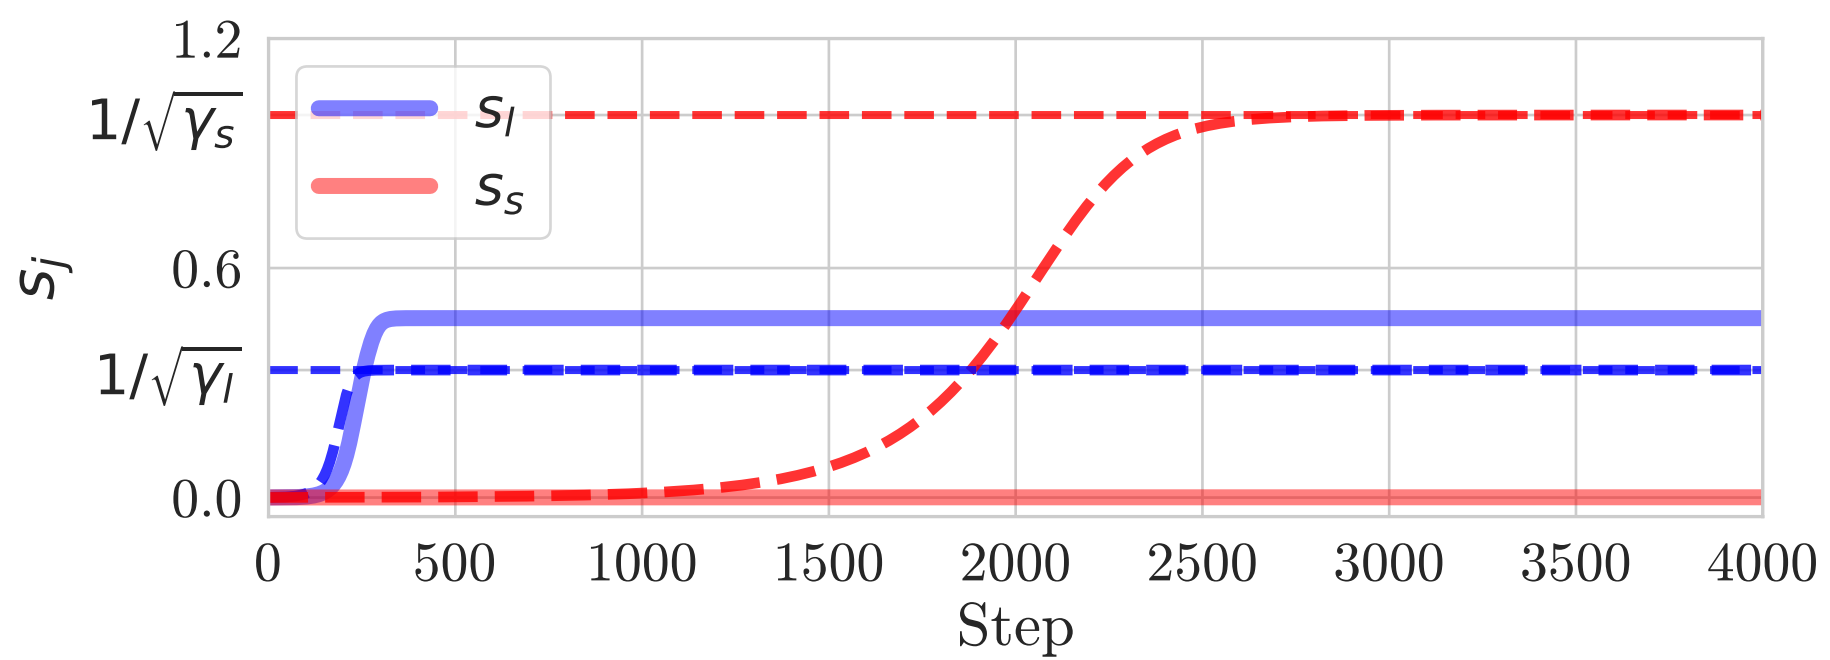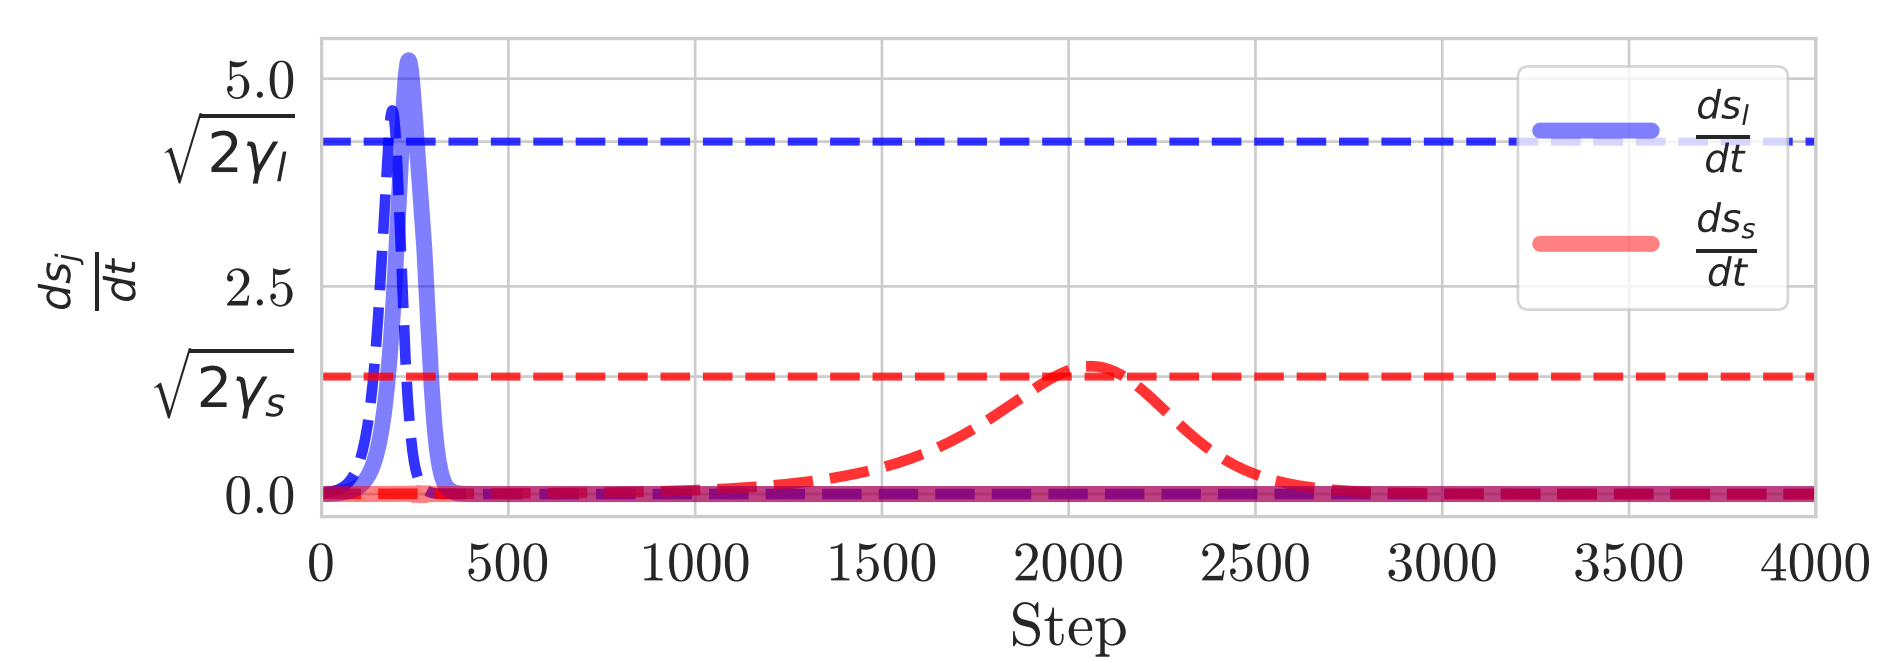

Supplement: supplementary_material [file dim_s_ds_dt.pdf › iclr2026/iclr/feature_preference/theoretical/linear/figure/dim_s_ds_dt.pdf]

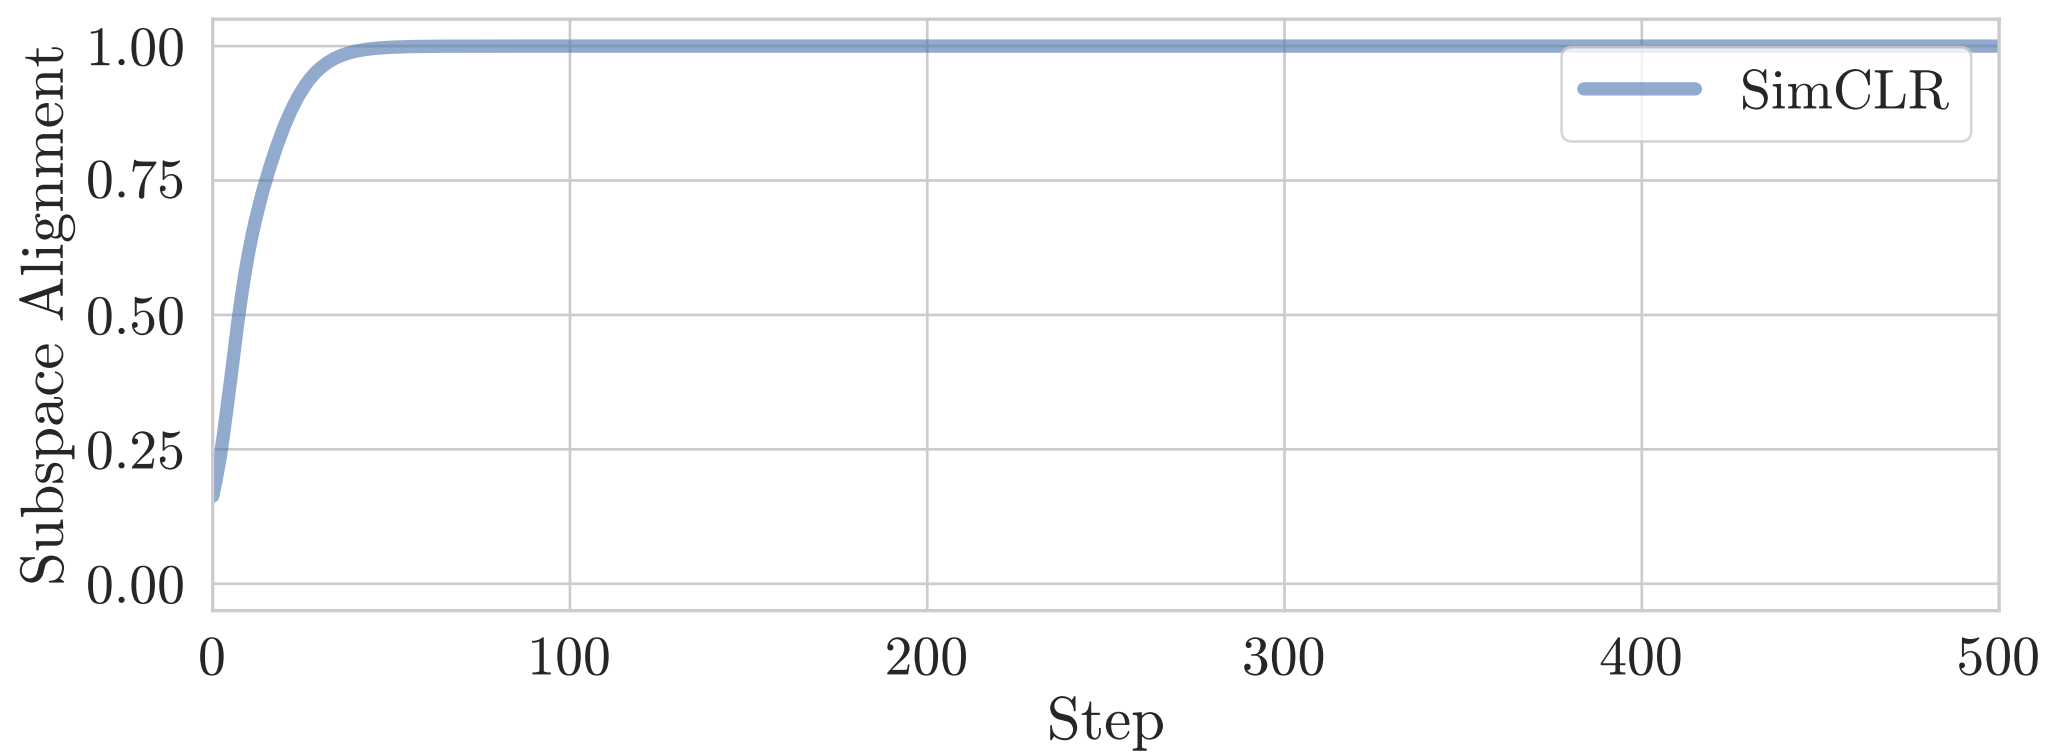

Supplement: supplementary_material [file dim_alignment.pdf › iclr2026/iclr/feature_preference/theoretical/linear/figure/simclr/dim_alignment.pdf]

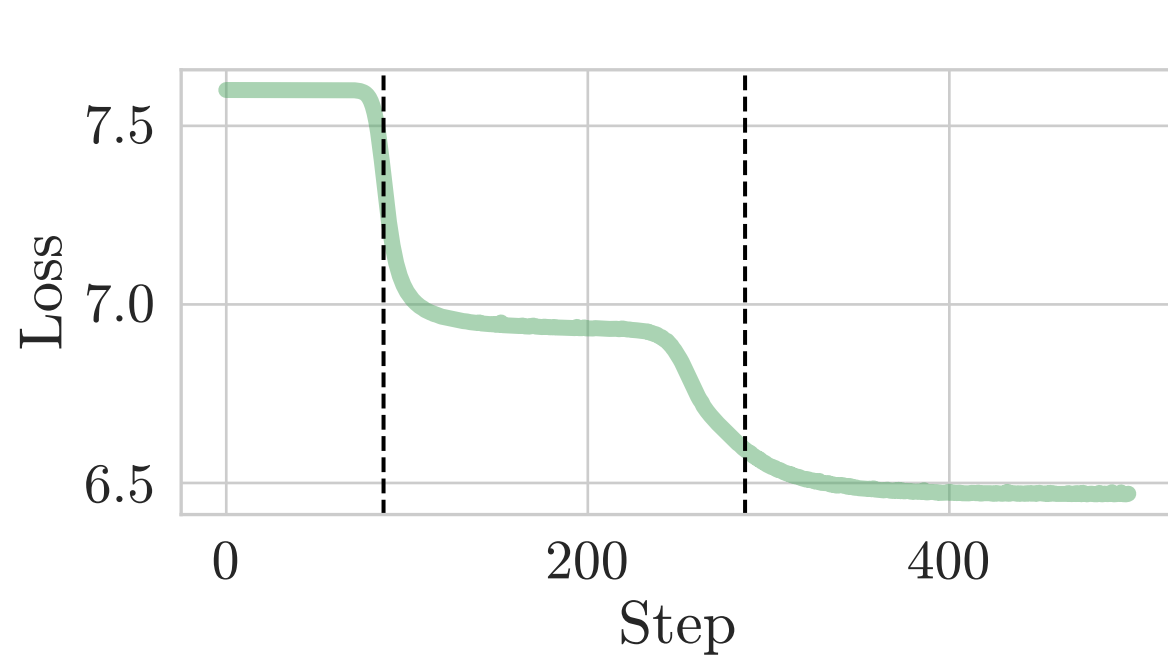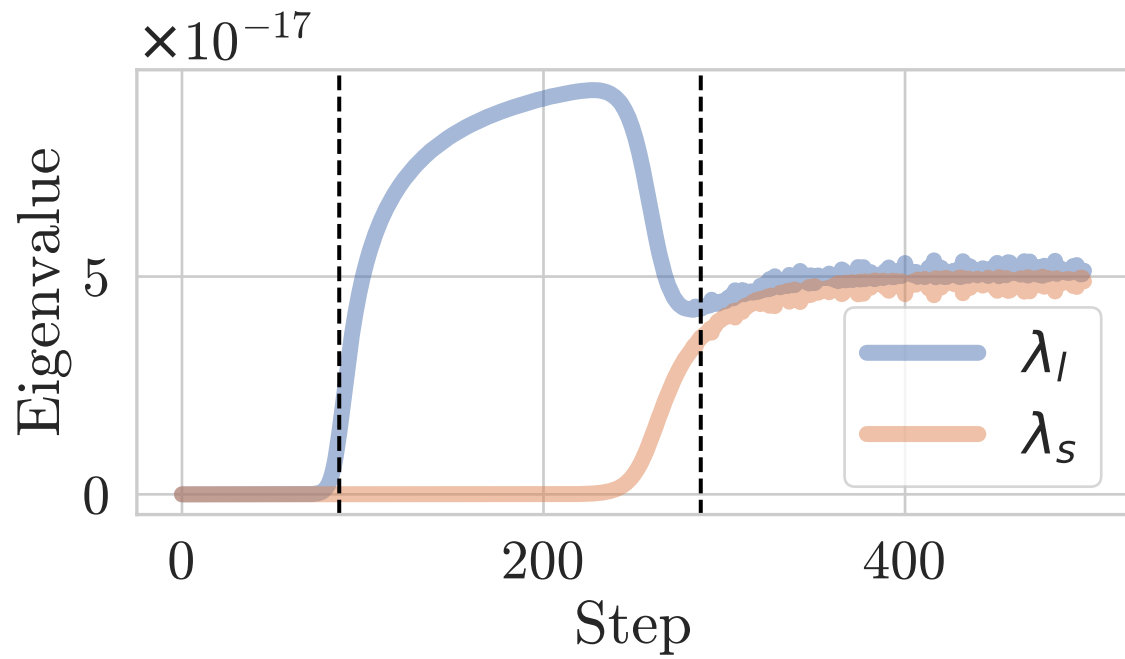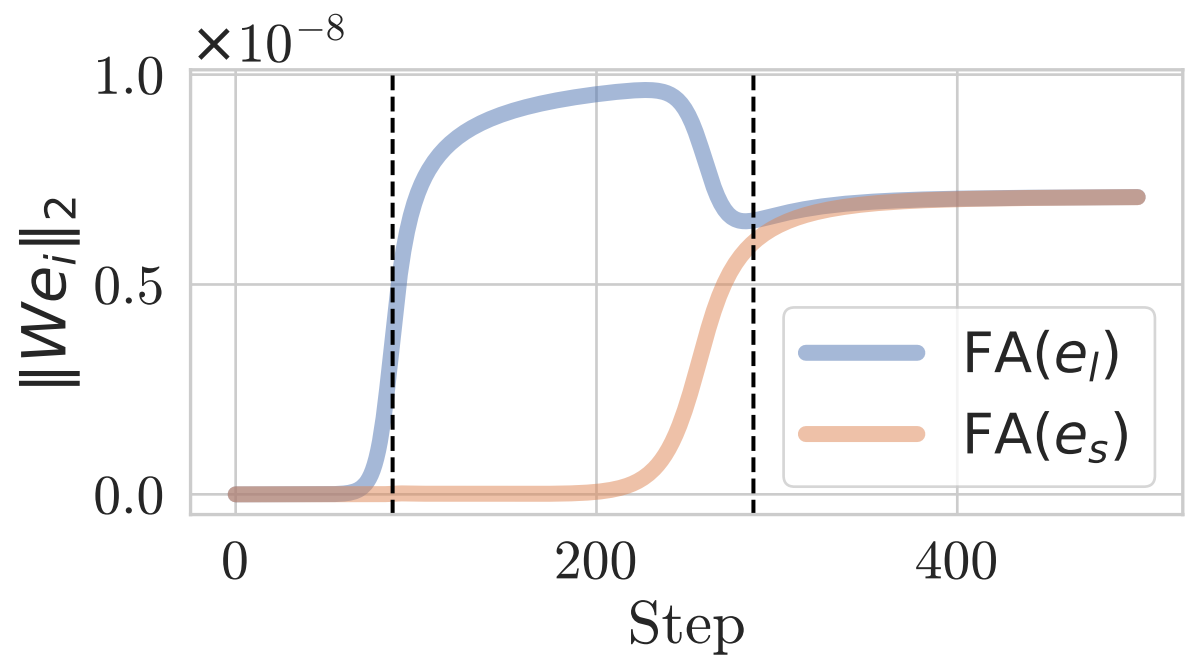

Supplement: supplementary_material [file dim_loss_eig_align_SimCLR.pdf › iclr2026/iclr/feature_preference/theoretical/linear/figure/simclr/dim_loss_eig_align_SimCLR.pdf]

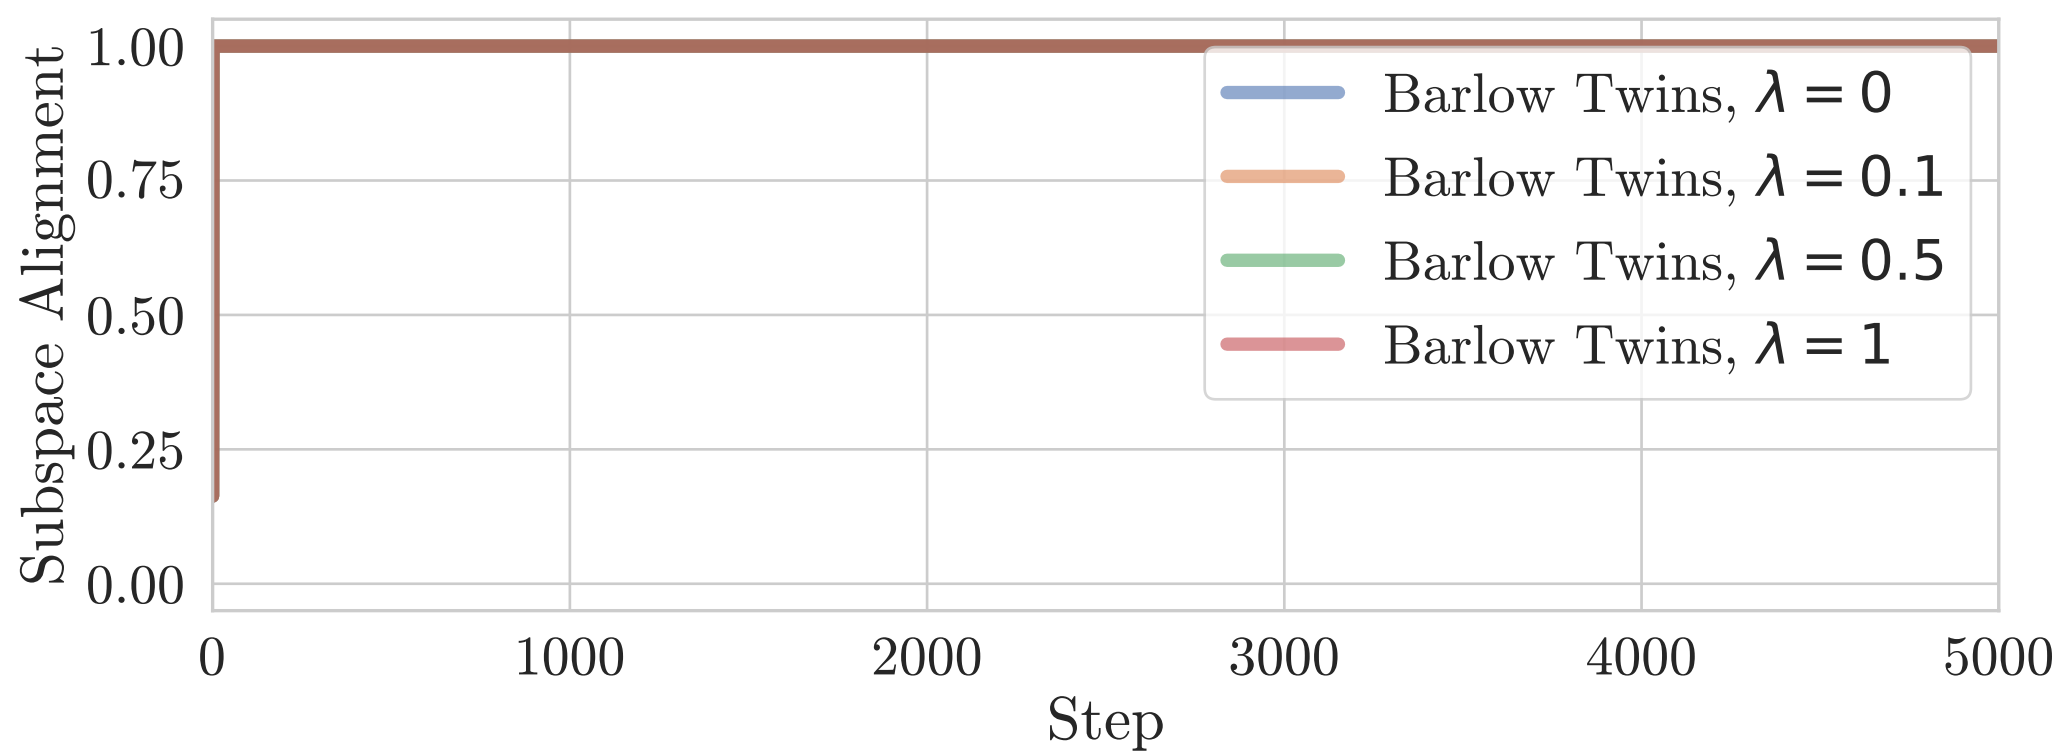

Supplement: supplementary_material [file dim_alignment.pdf › iclr2026/iclr/feature_preference/theoretical/linear/figure/vicreg/dim_alignment.pdf]

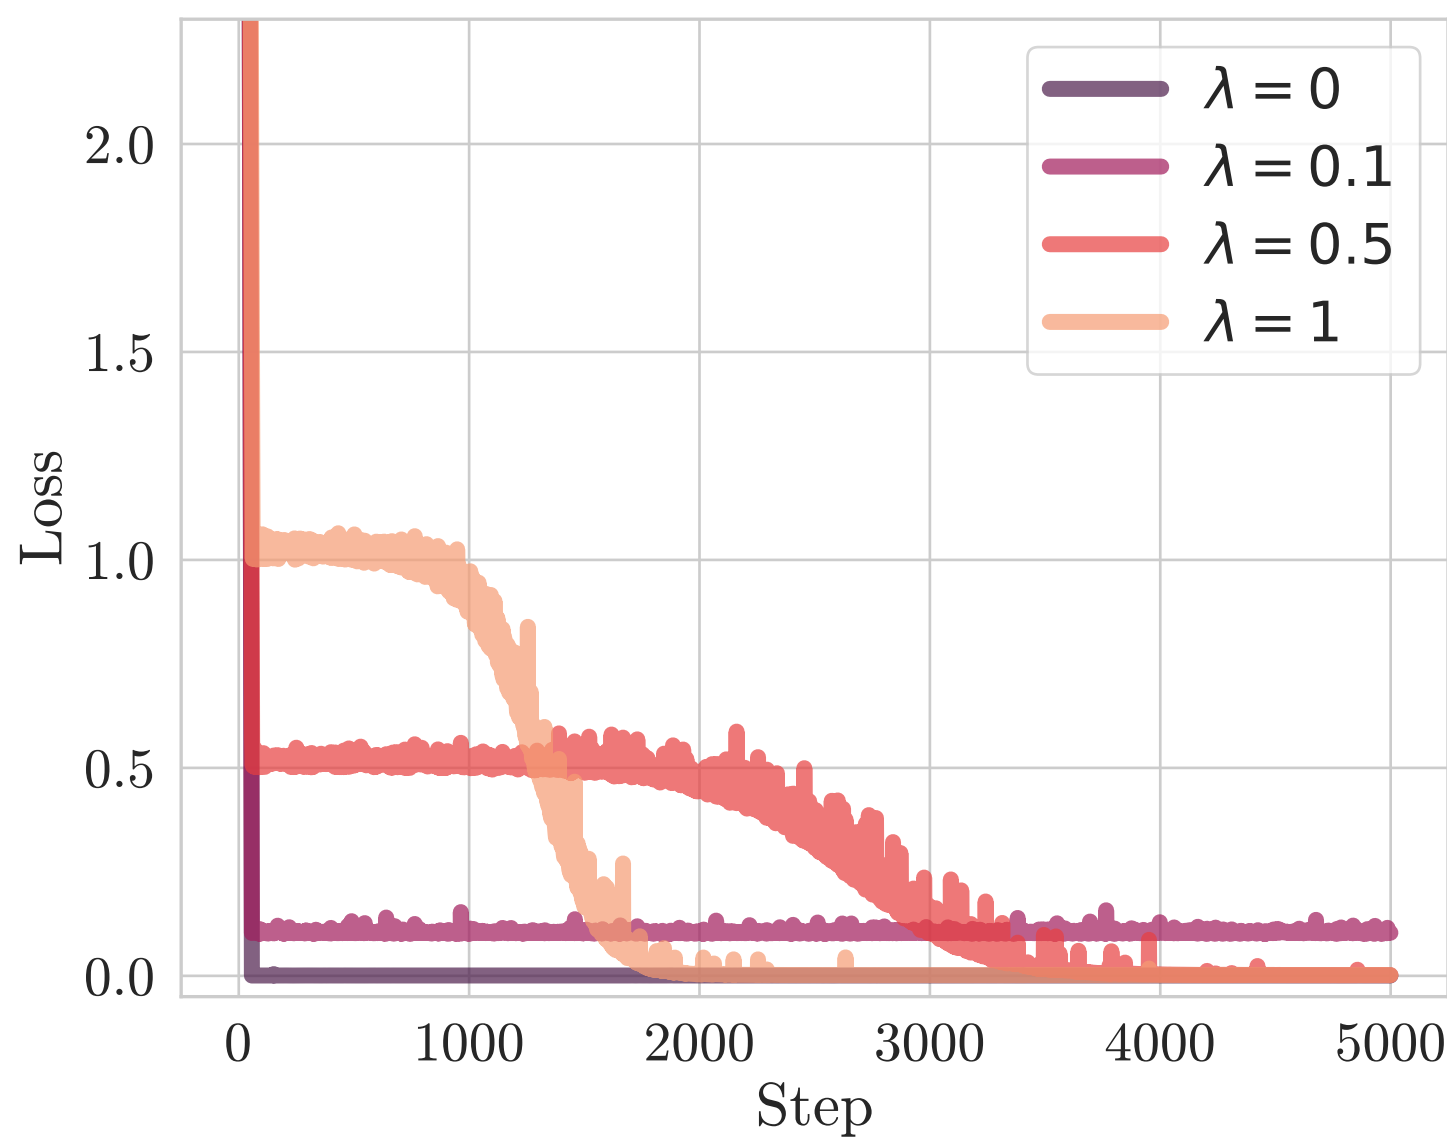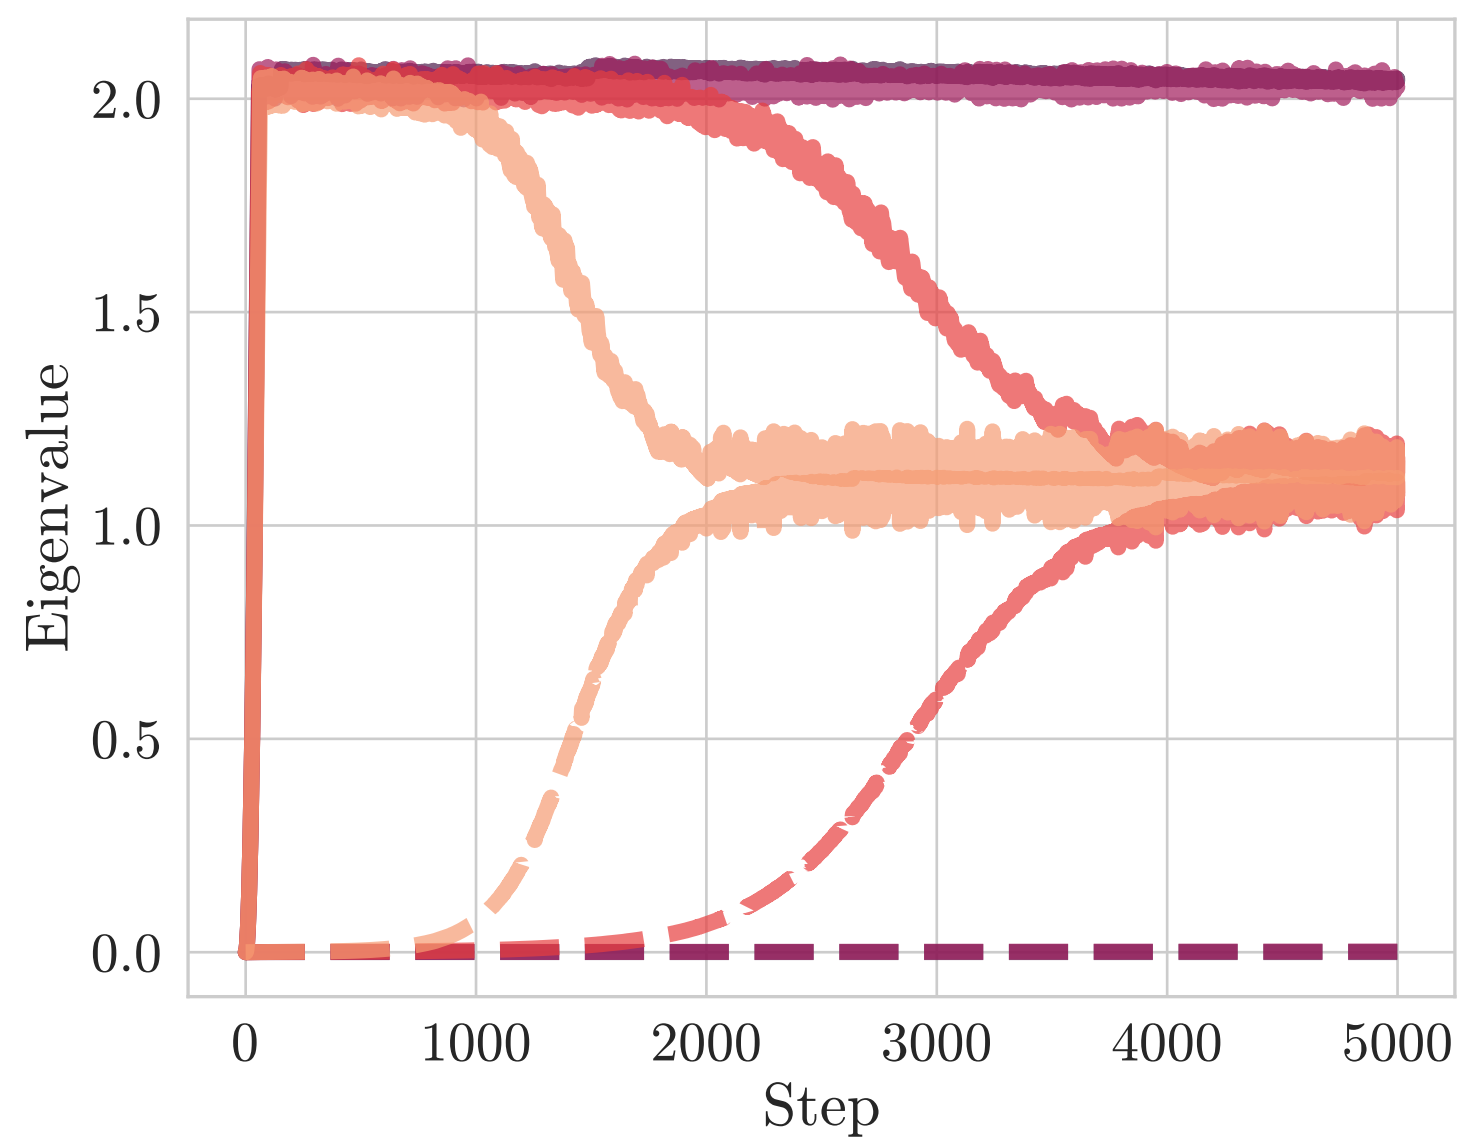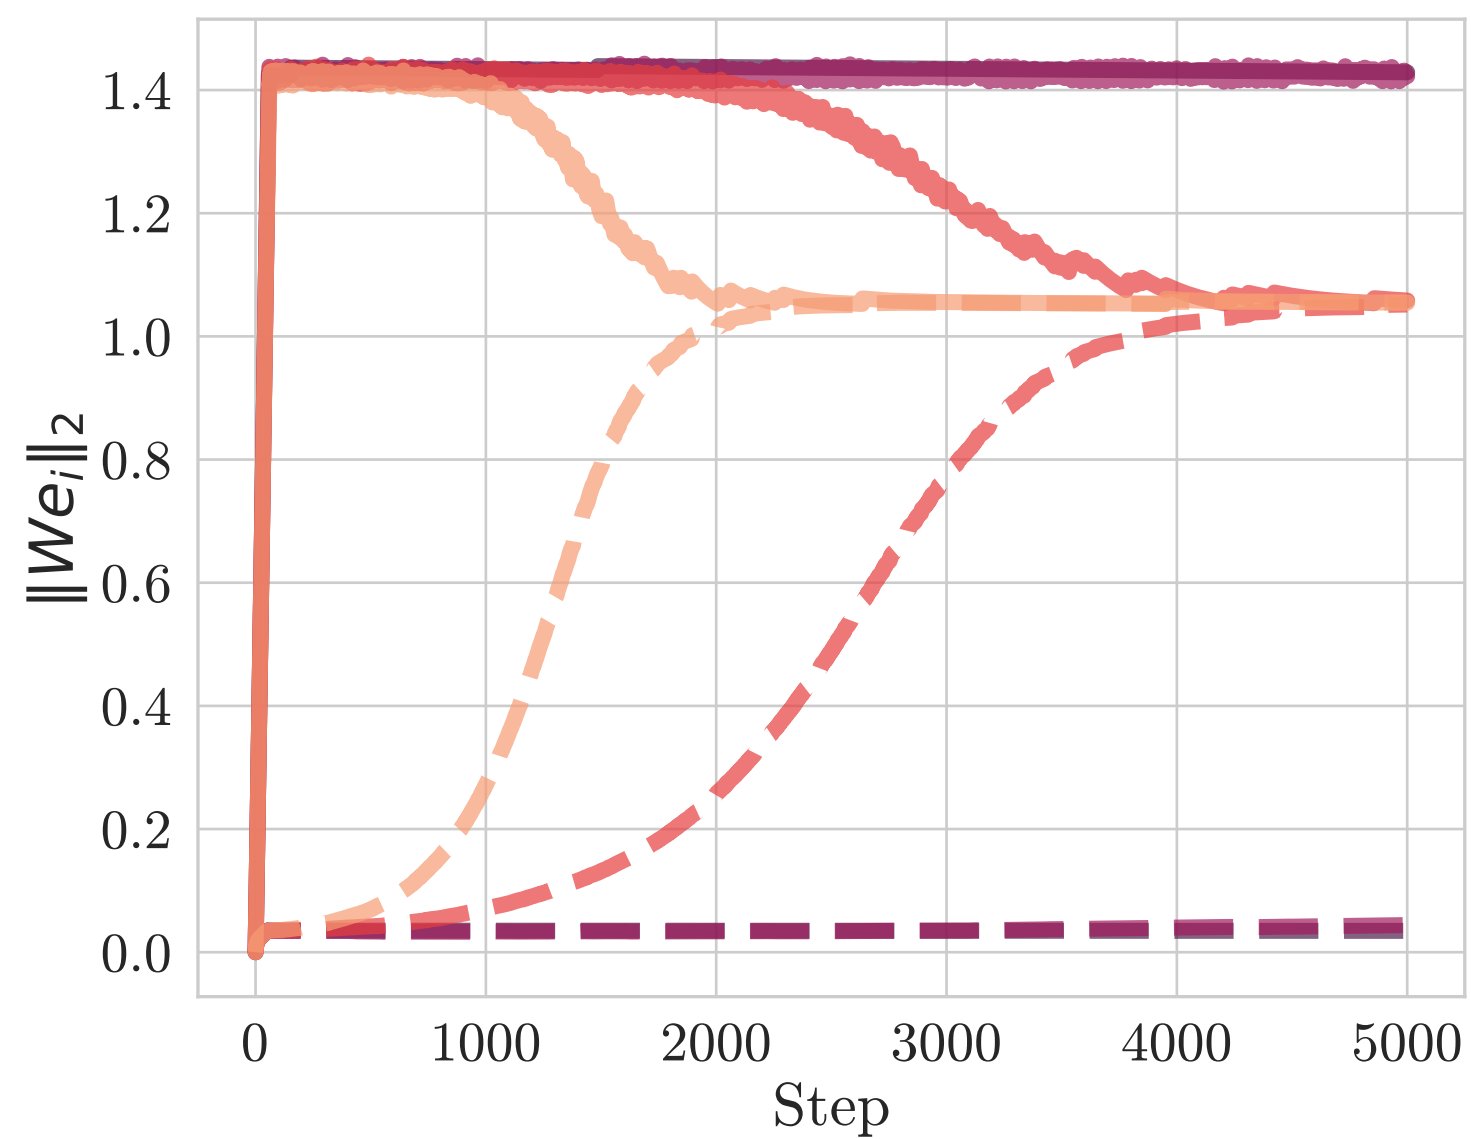

Supplement: supplementary_material [file loss_lambda_all.pdf › iclr2026/iclr/feature_preference/theoretical/linear/figure/vicreg/loss_lambda_all.pdf]

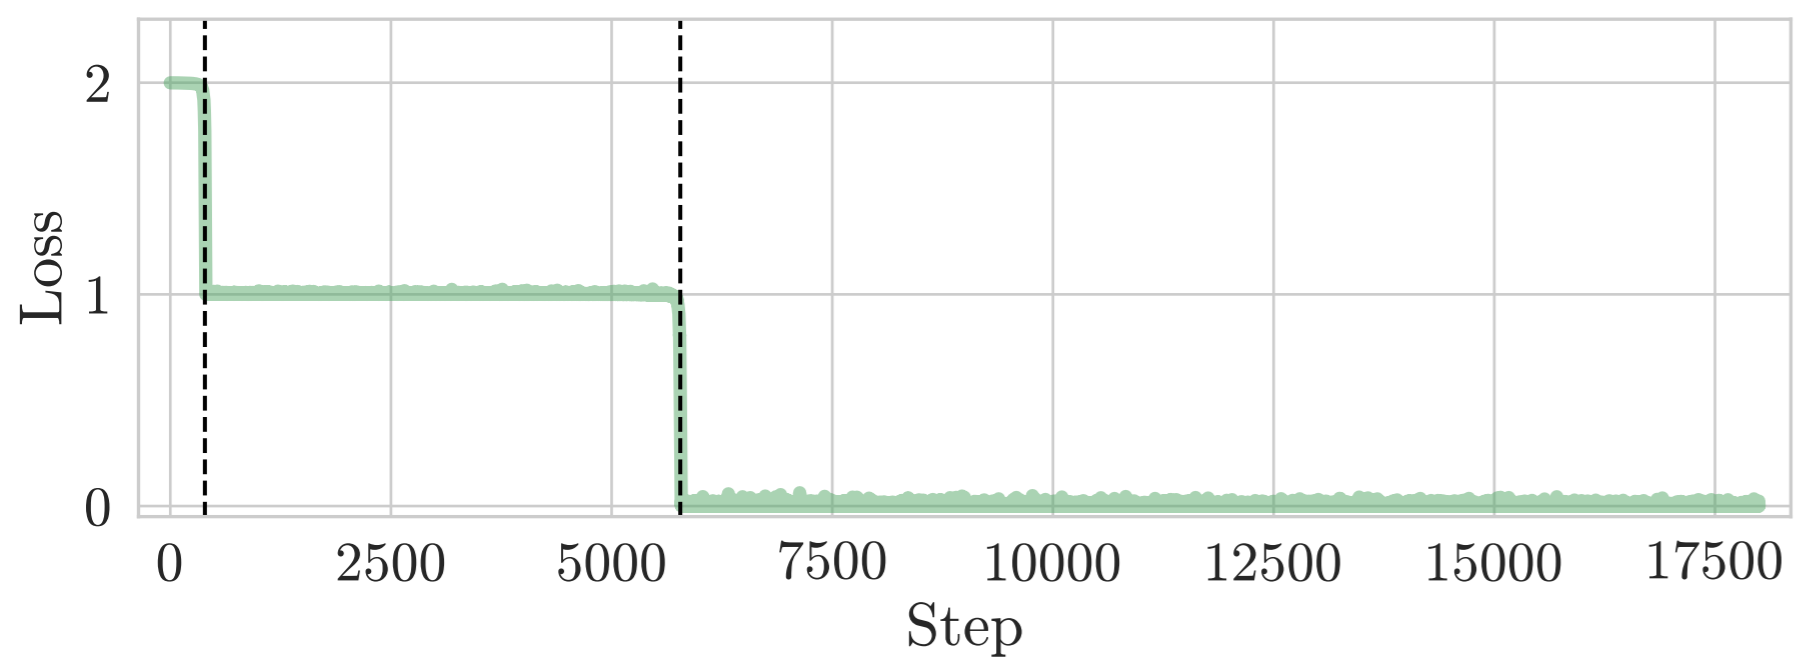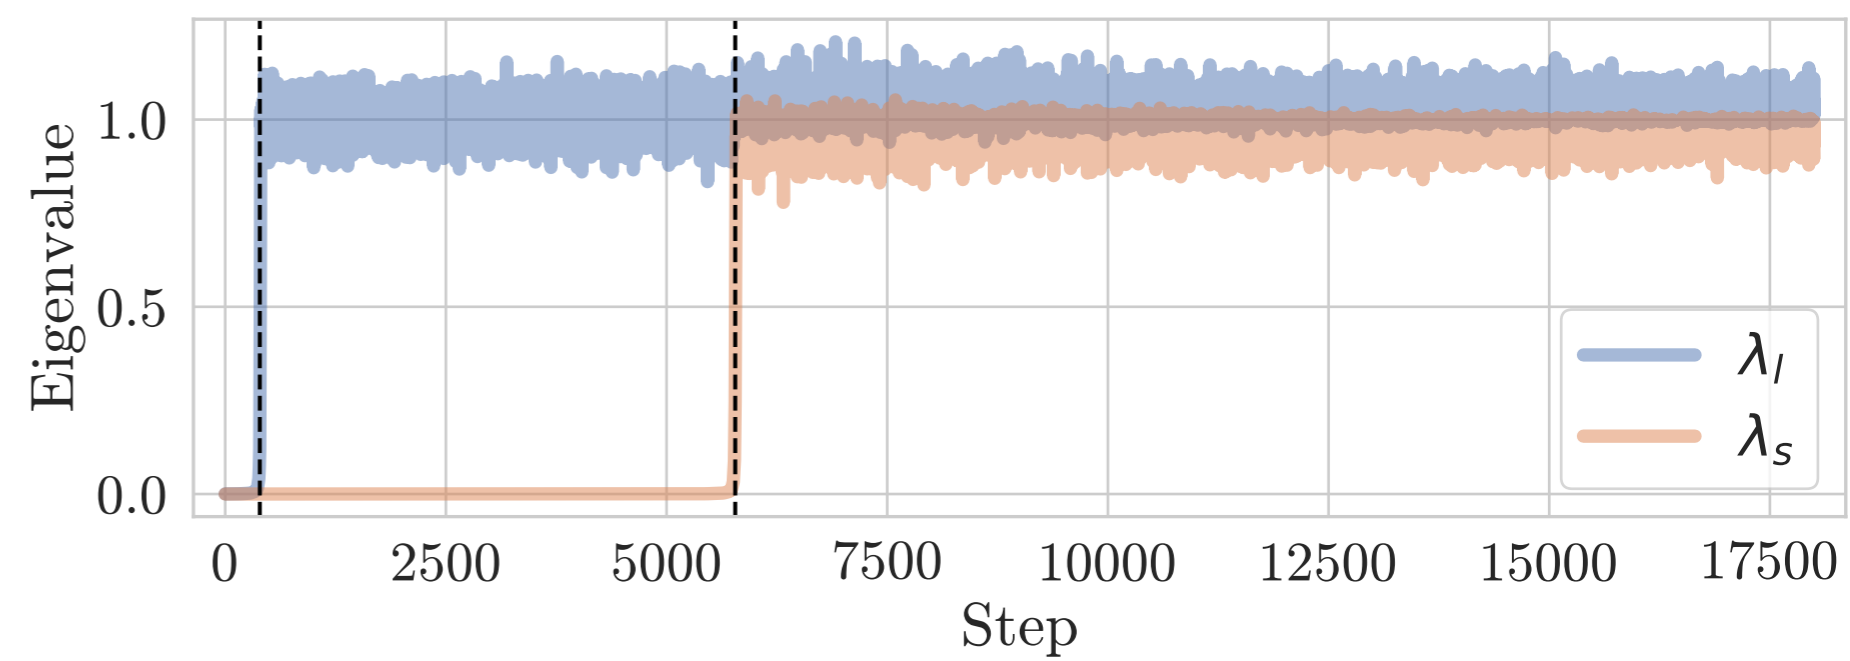

Supplement: supplementary_material [file dim_loss_eig.pdf › iclr2026/iclr/feature_preference/theoretical/mlp/figure/barlowtwins/dim_loss_eig.pdf]

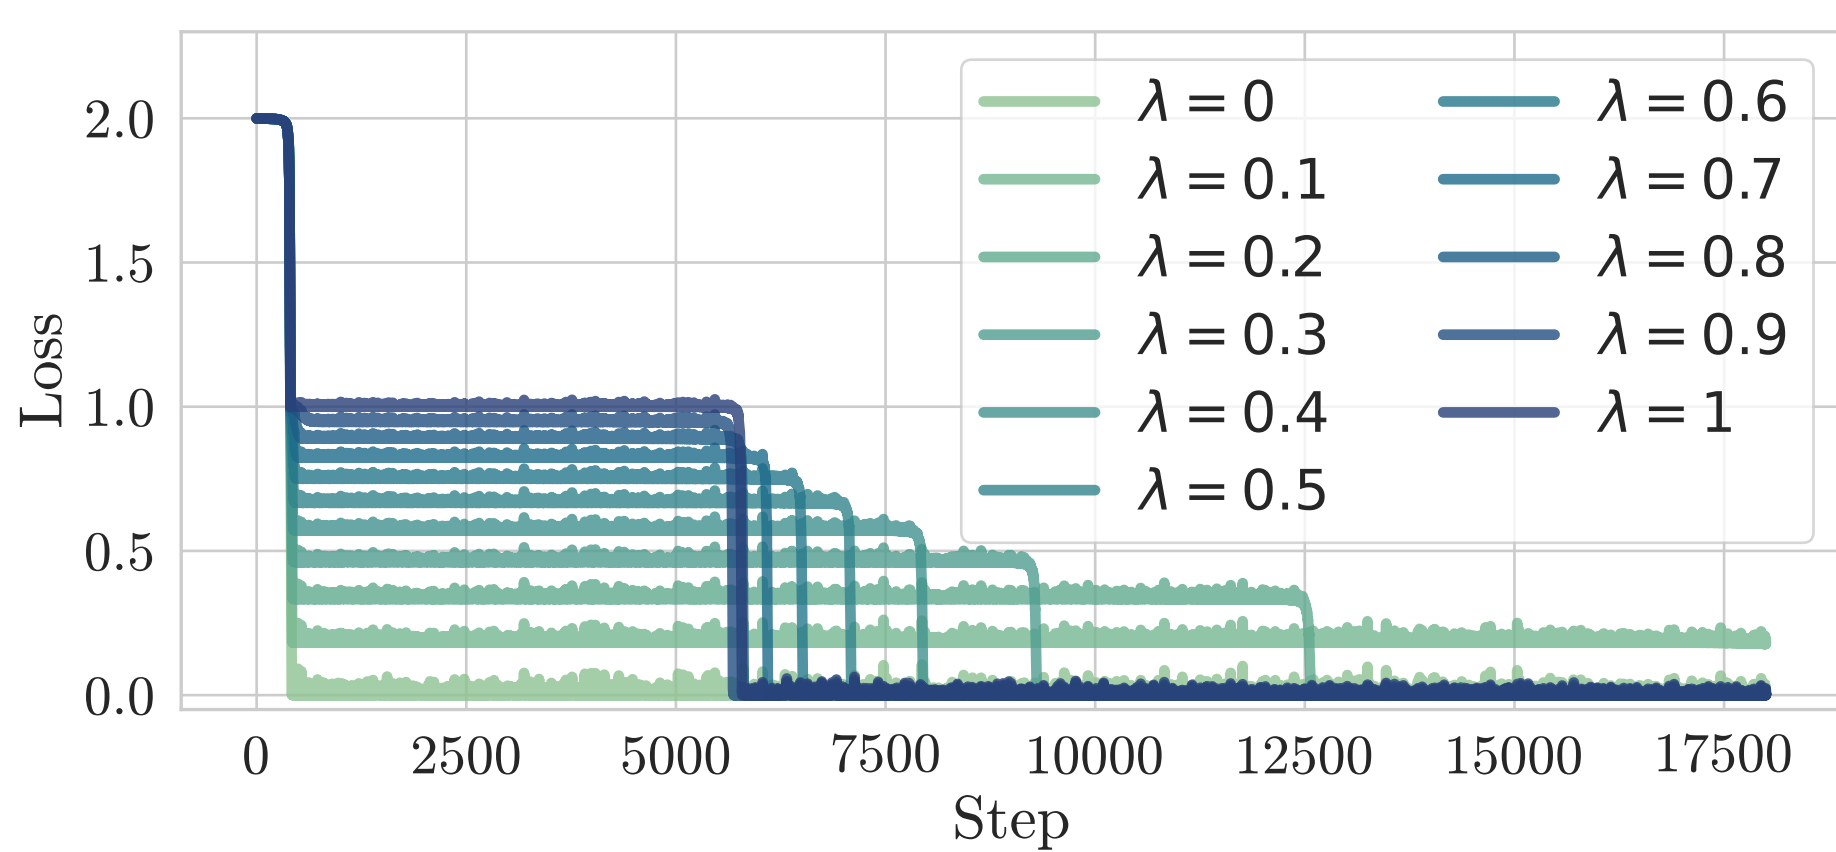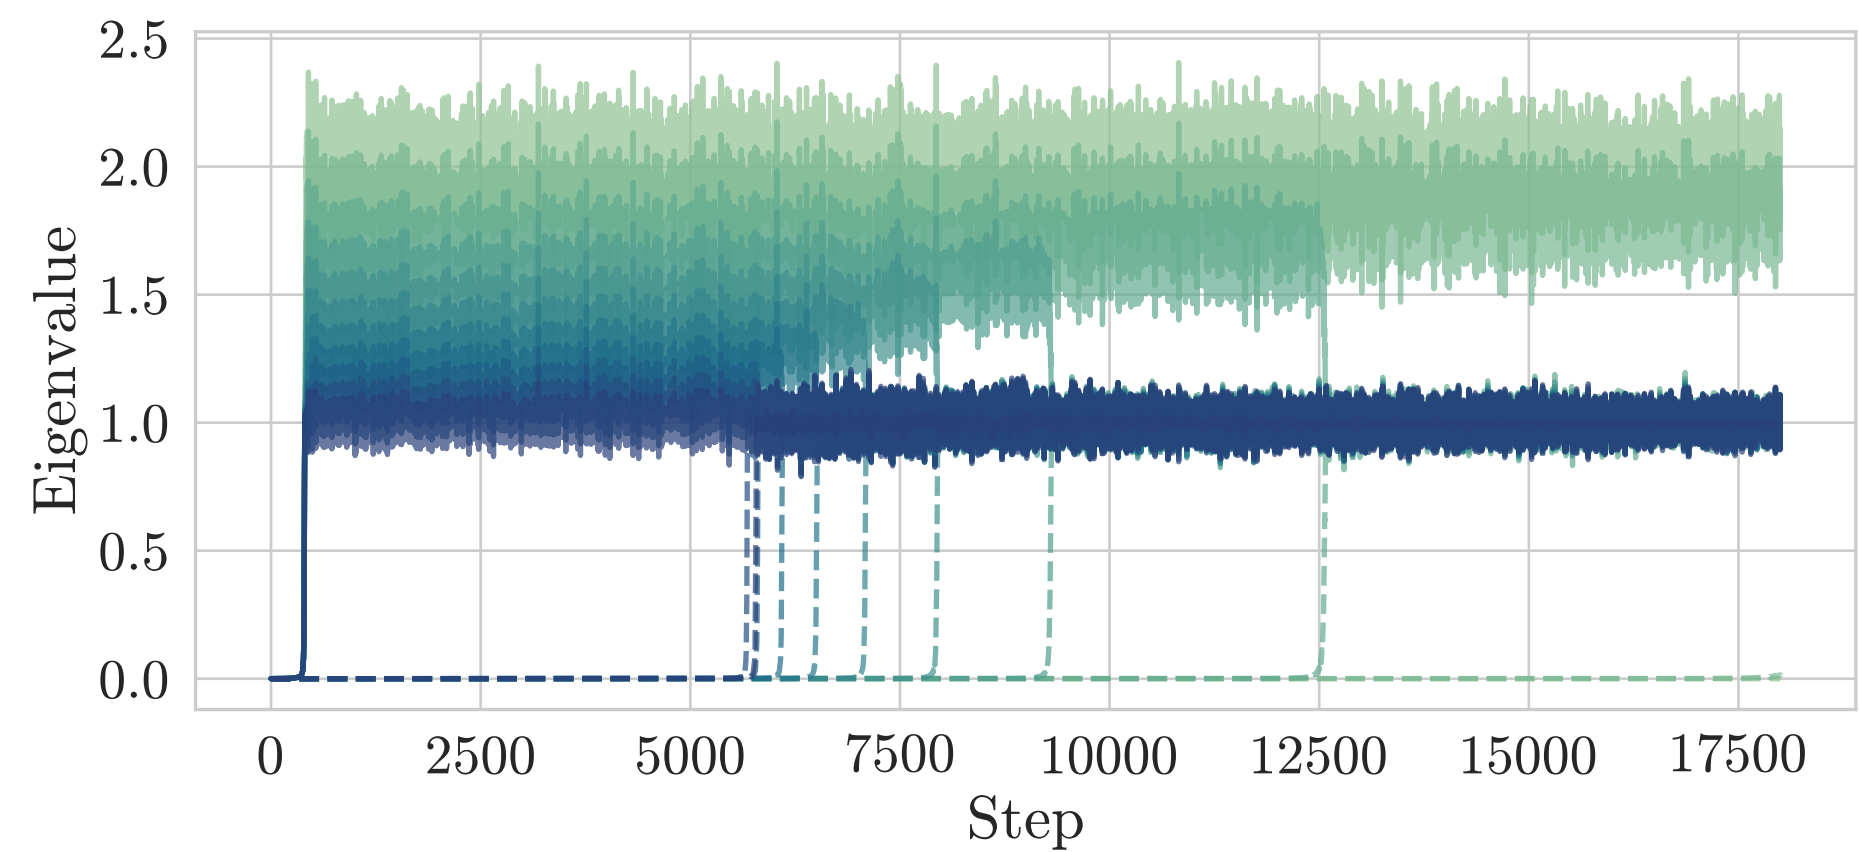

Supplement: supplementary_material [file loss_lambda_all.pdf › iclr2026/iclr/feature_preference/theoretical/mlp/figure/barlowtwins/loss_lambda_all.pdf]

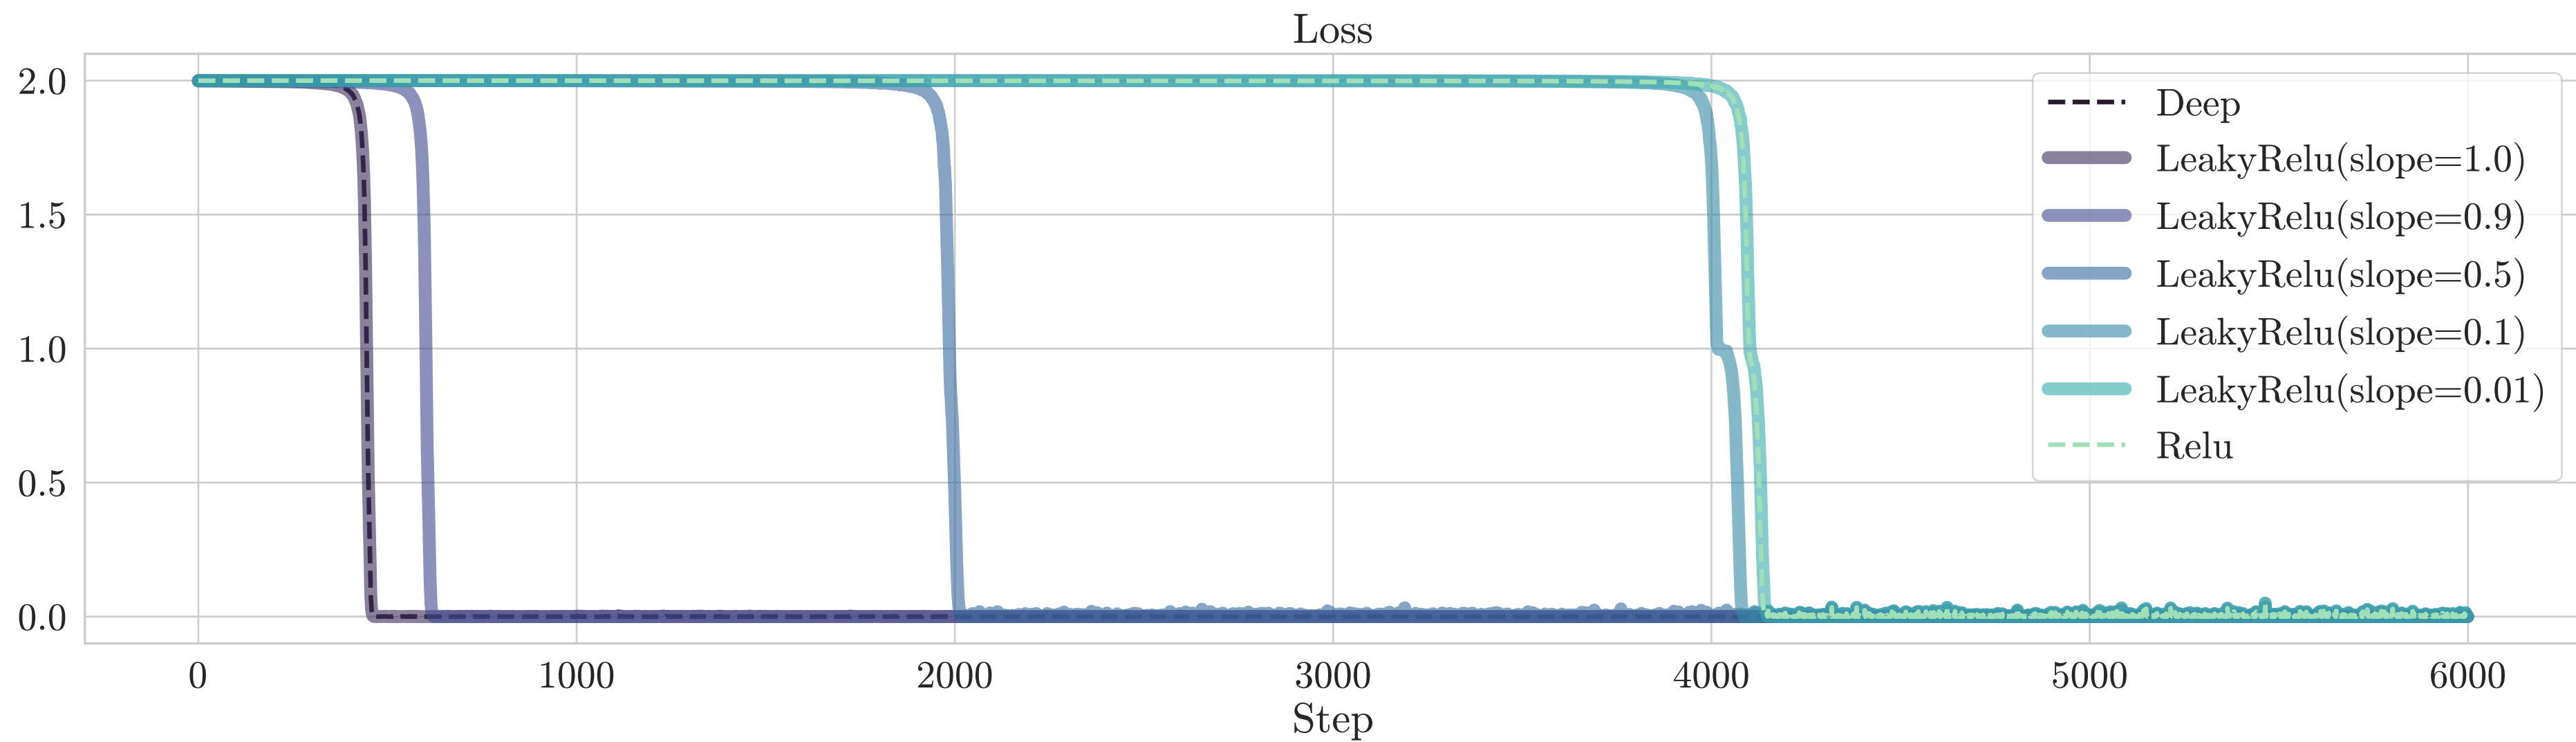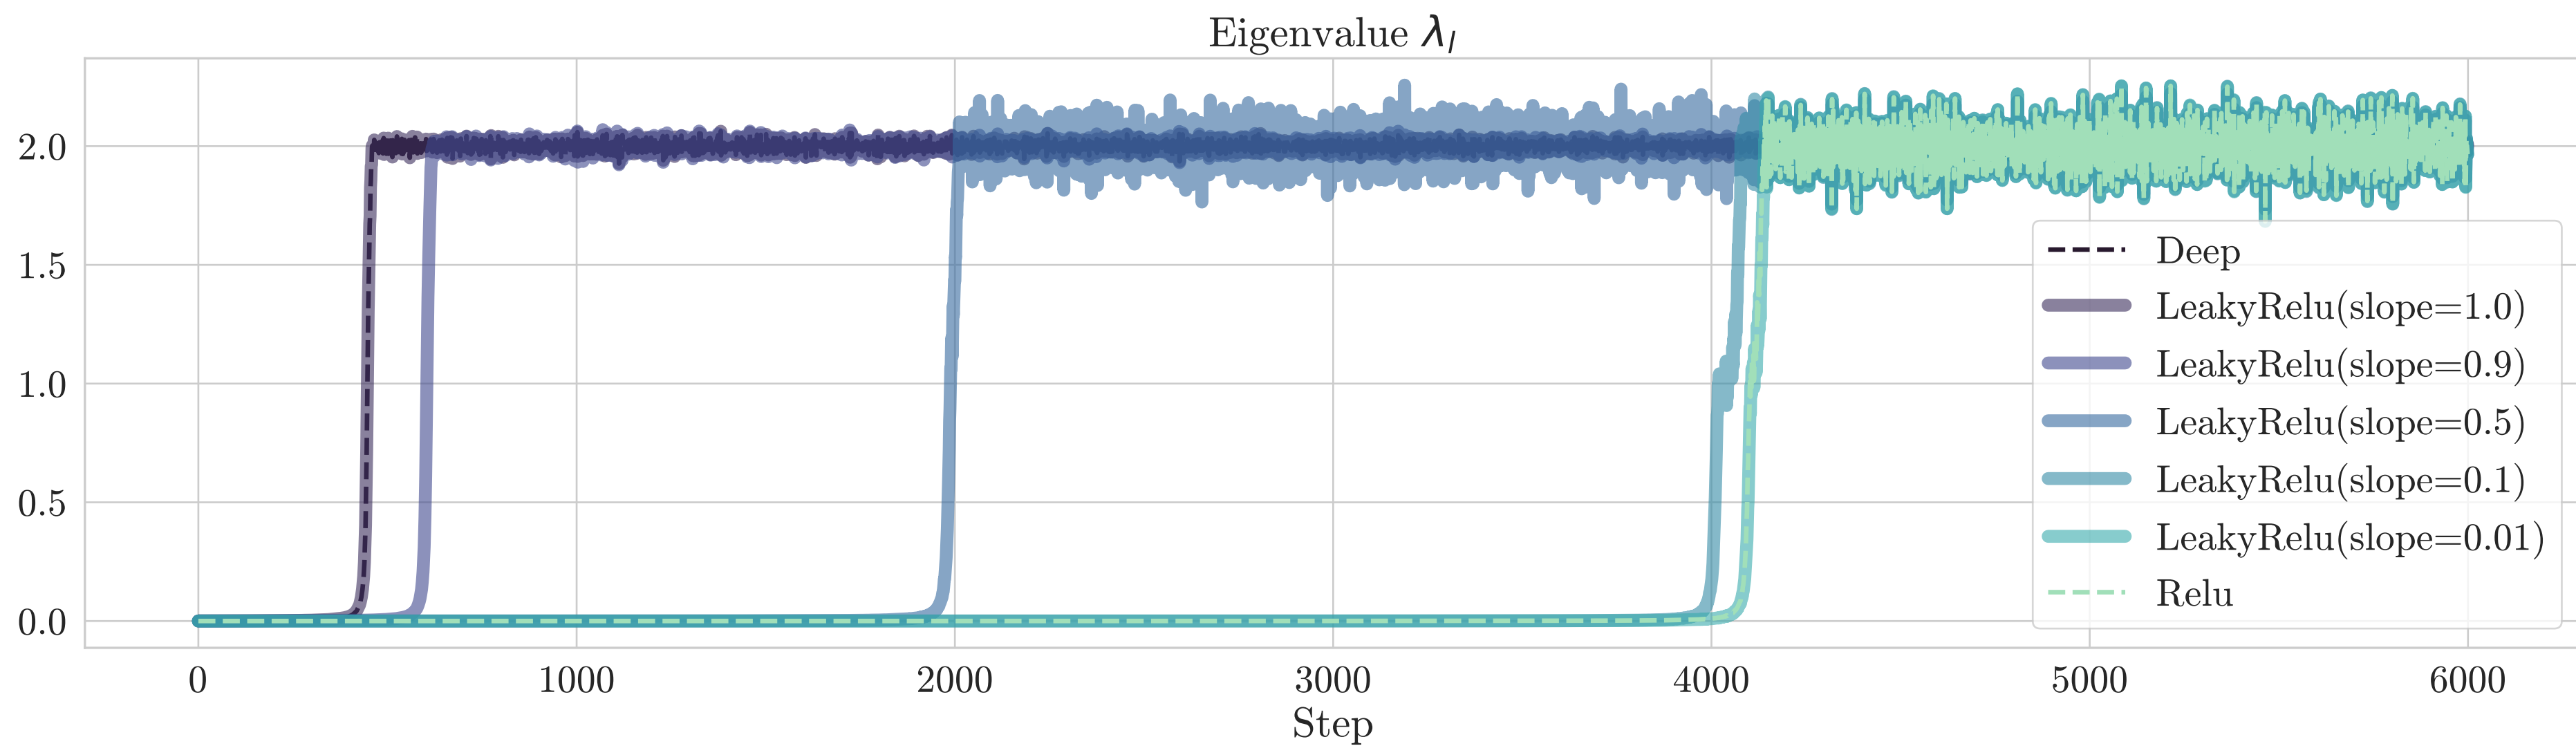

Supplement: supplementary_material [file non_linearity.pdf › iclr2026/iclr/feature_preference/theoretical/mlp/figure/barlowtwins/non_linearity.pdf]

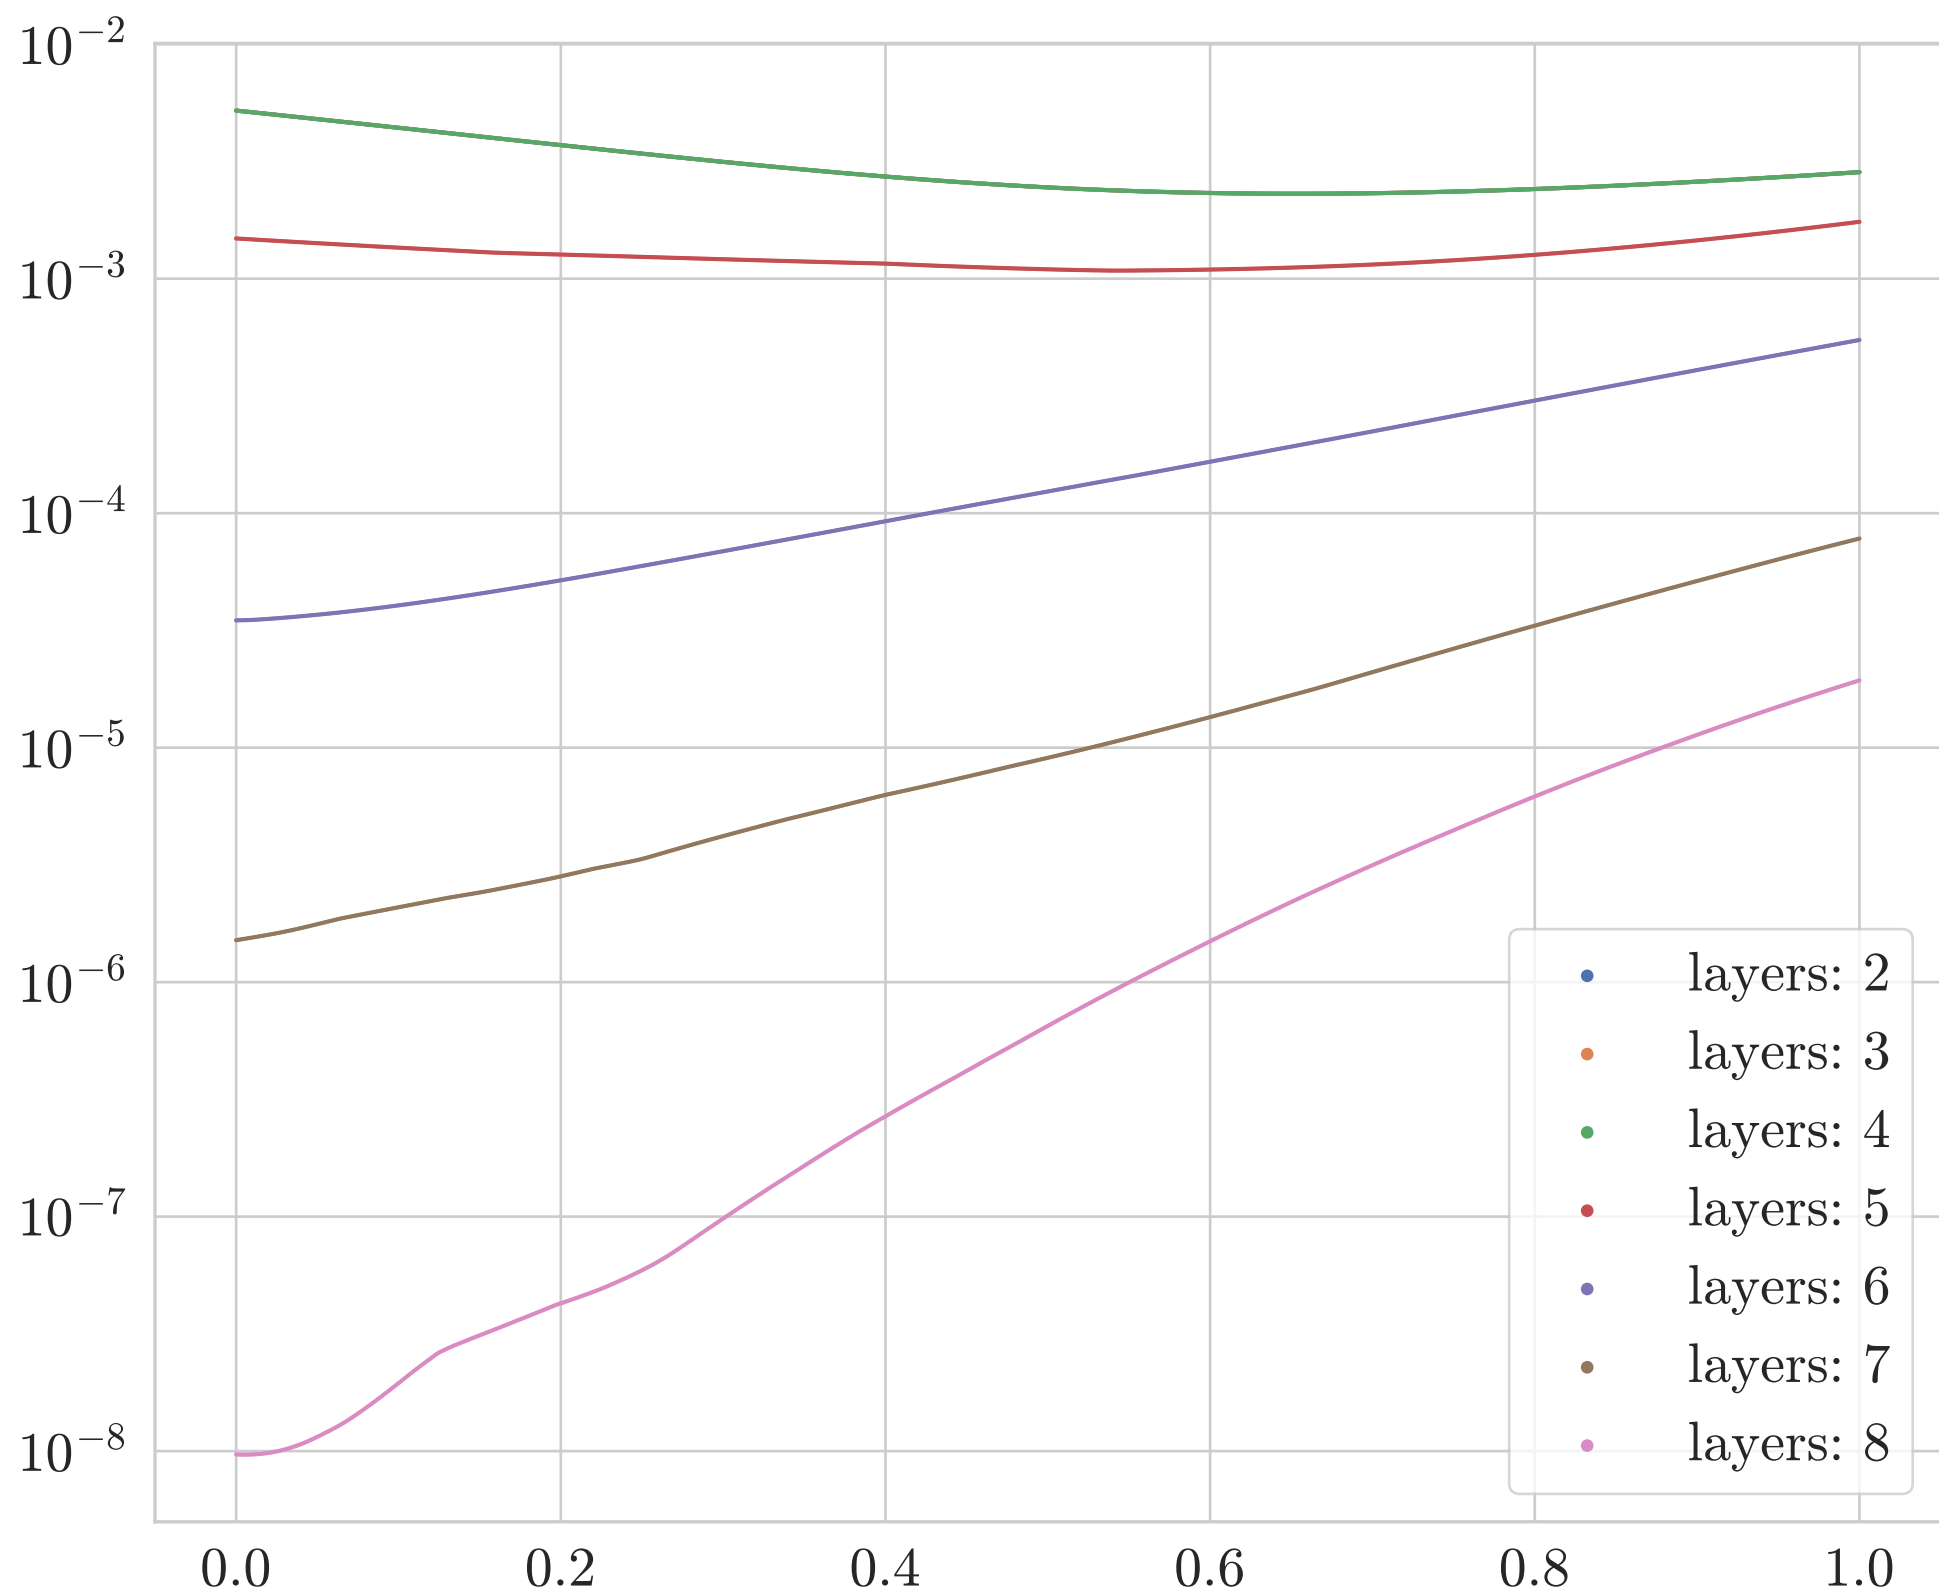

Supplement: supplementary_material [file leaky_relu_initial_eigenvalue.pdf › iclr2026/iclr/feature_preference/theoretical/mlp/figure/leaky_relu_initial_eigenvalue.pdf]

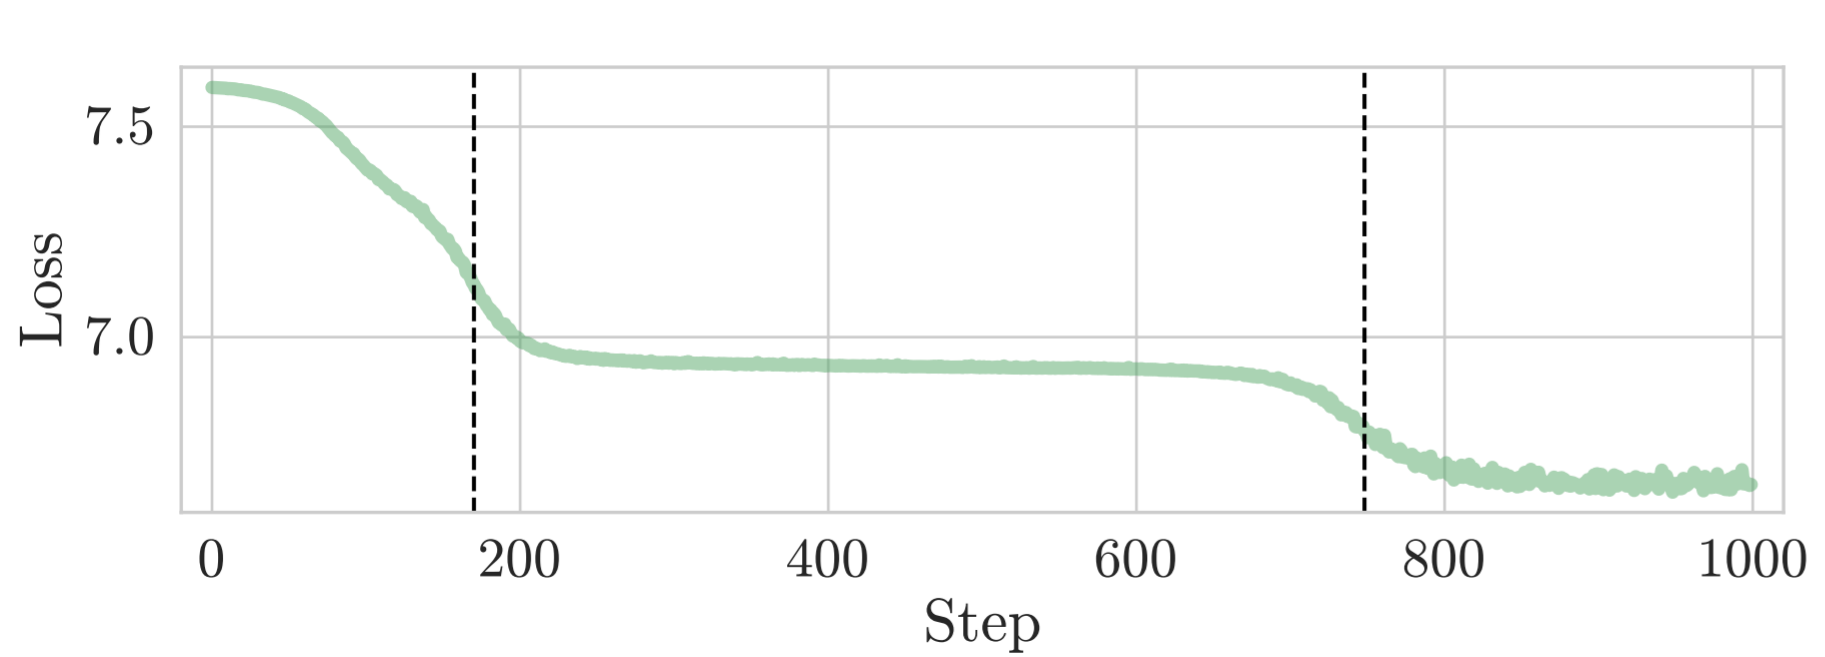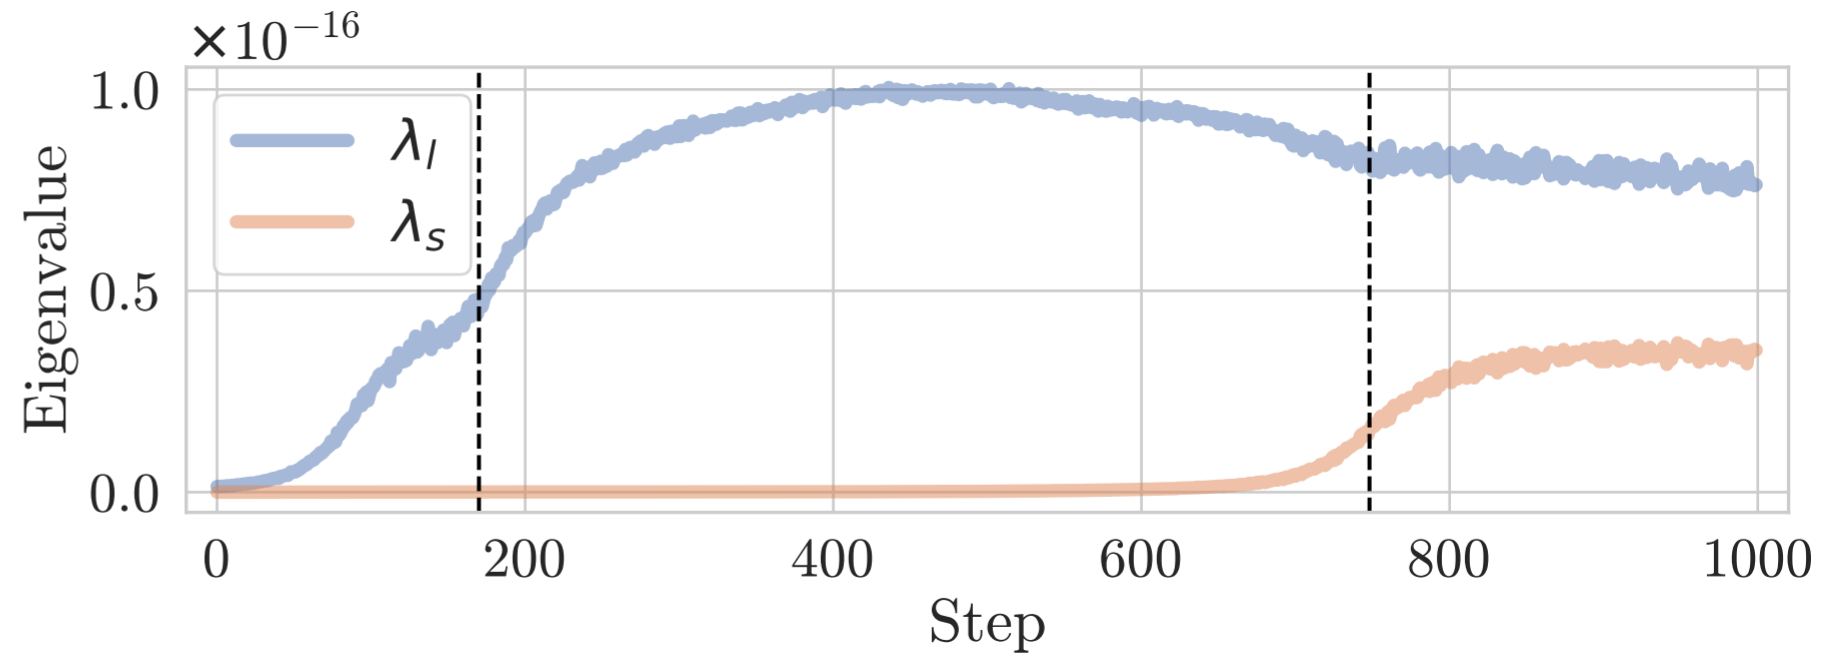

Supplement: supplementary_material [file dim_loss_eig.pdf › iclr2026/iclr/feature_preference/theoretical/mlp/figure/simclr/dim_loss_eig.pdf]

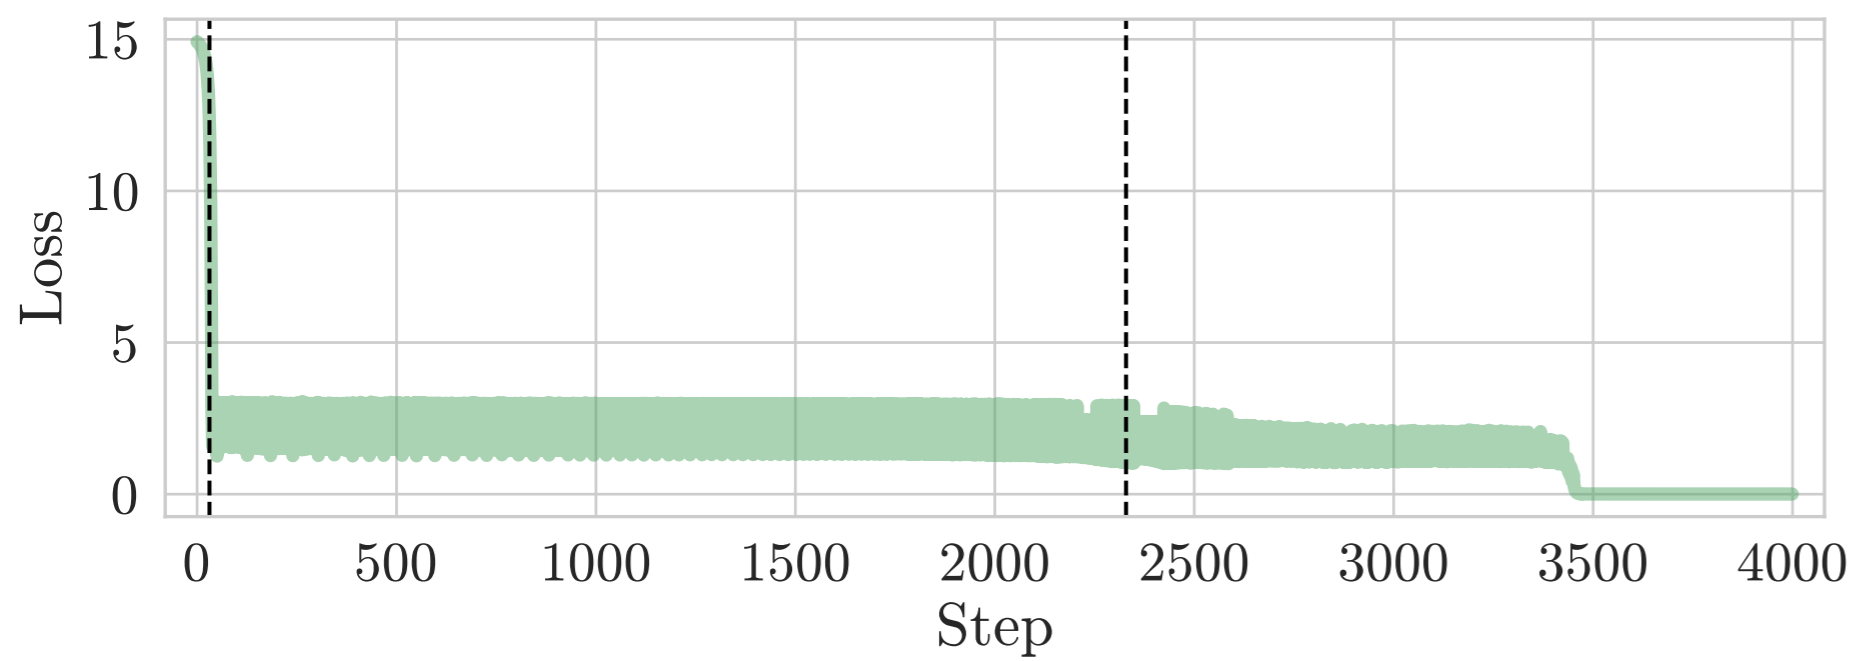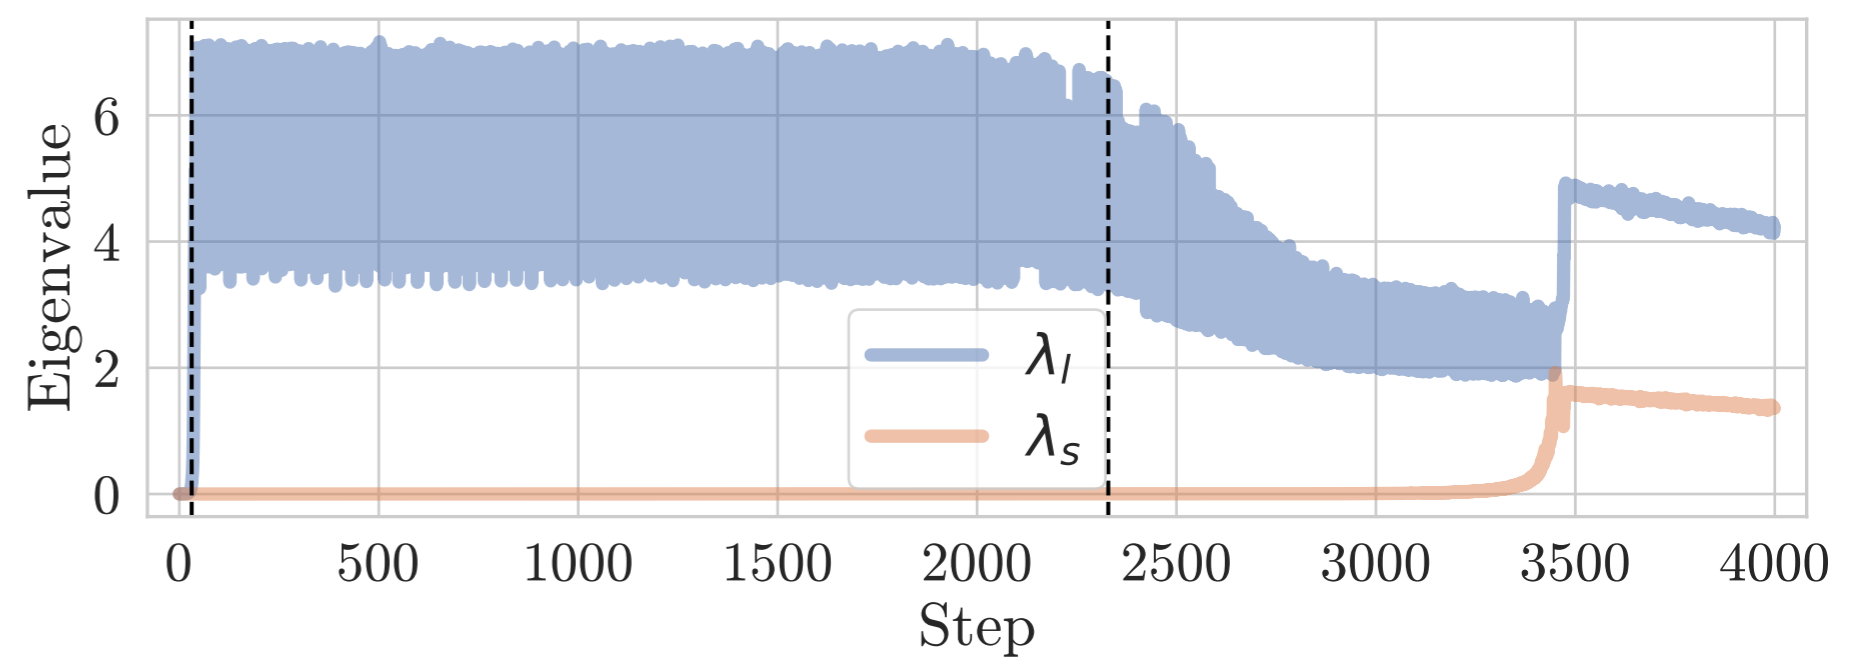

Supplement: supplementary_material [file dim_loss_eig.pdf › iclr2026/iclr/feature_preference/theoretical/mlp/figure/vicreg/dim_loss_eig.pdf]

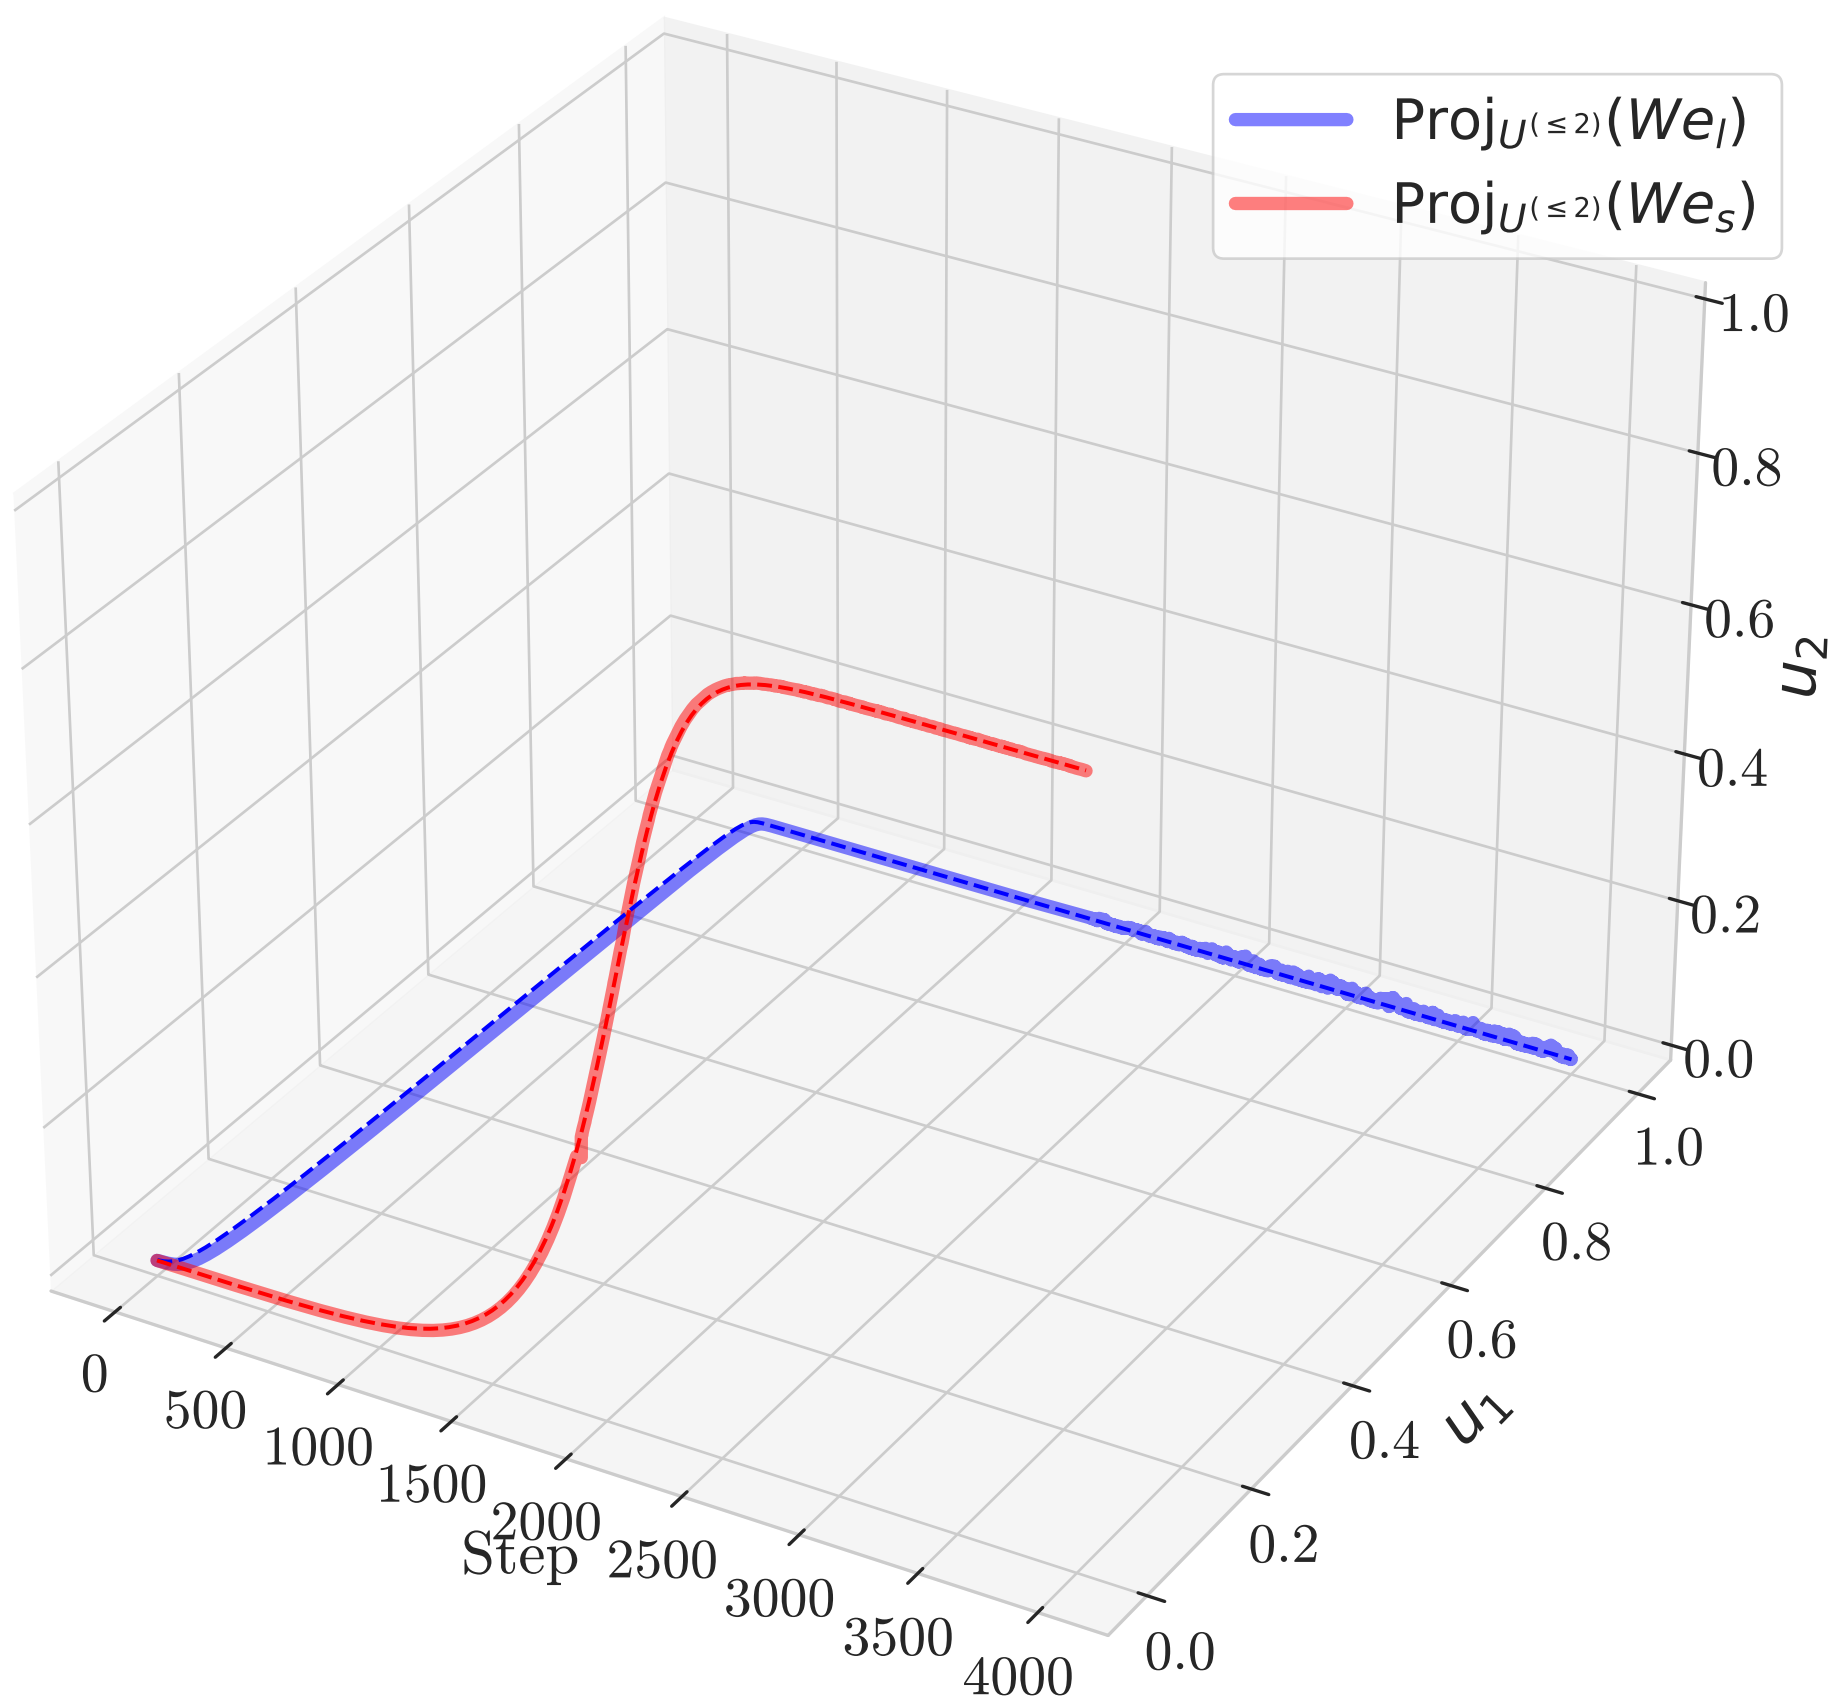

Supplement: supplementary_material [file dim_3d.pdf › iclr2026/iclr/feature_preference/theoretical/old/figure/dim_3d.pdf]

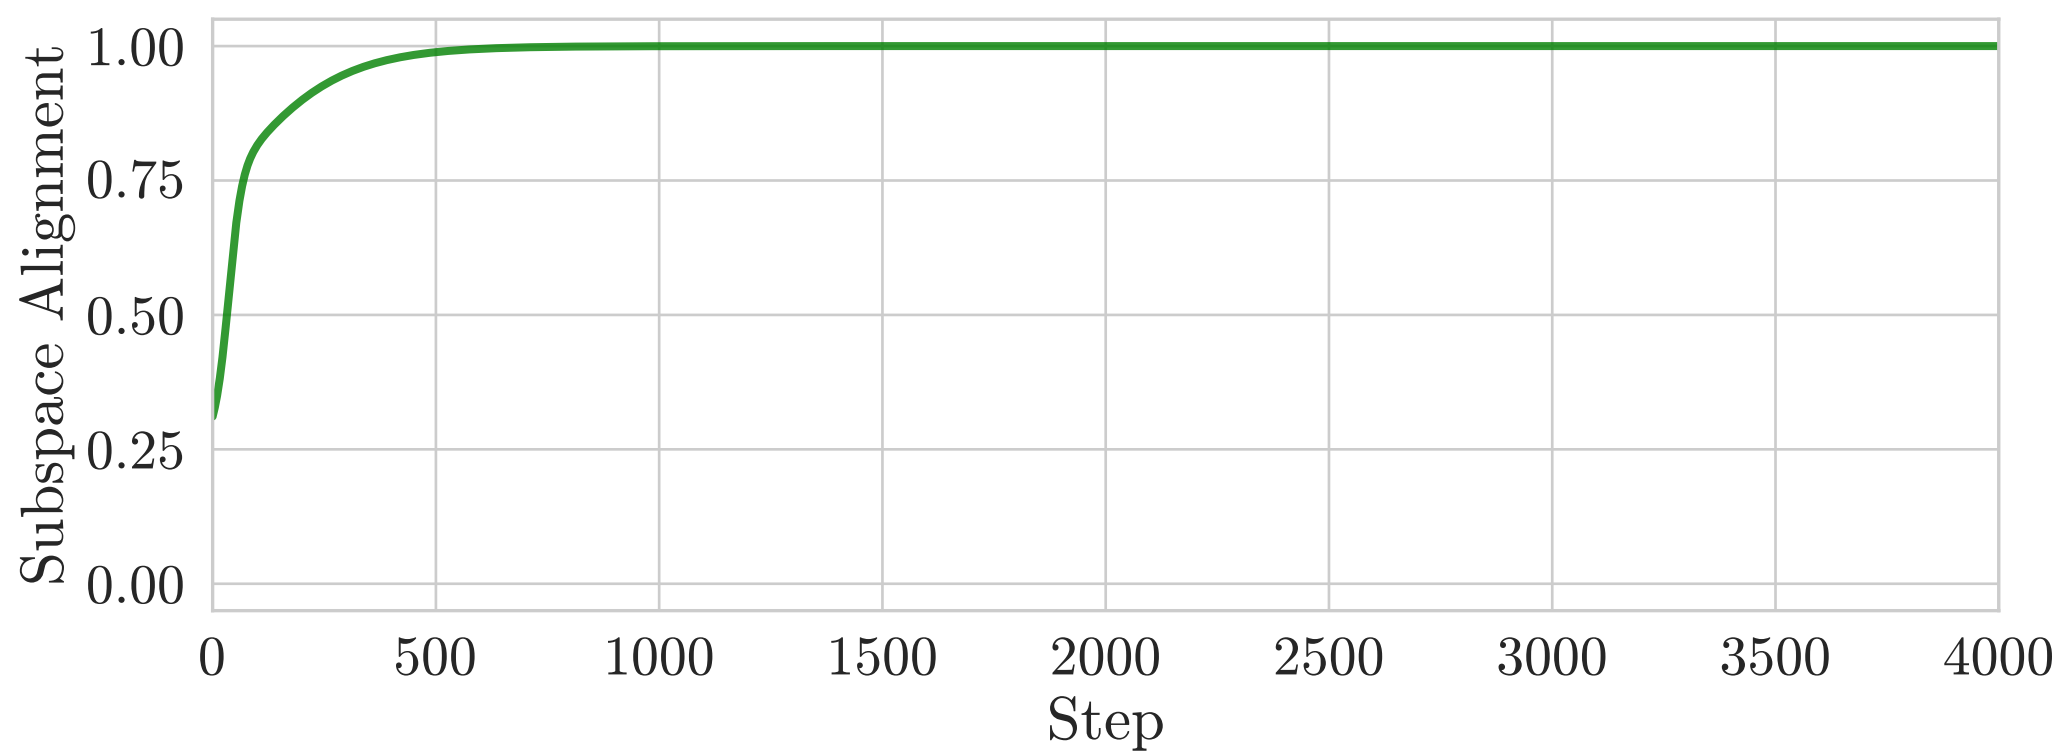

Supplement: supplementary_material [file dim_alignment.pdf › iclr2026/iclr/feature_preference/theoretical/old/figure/dim_alignment.pdf]

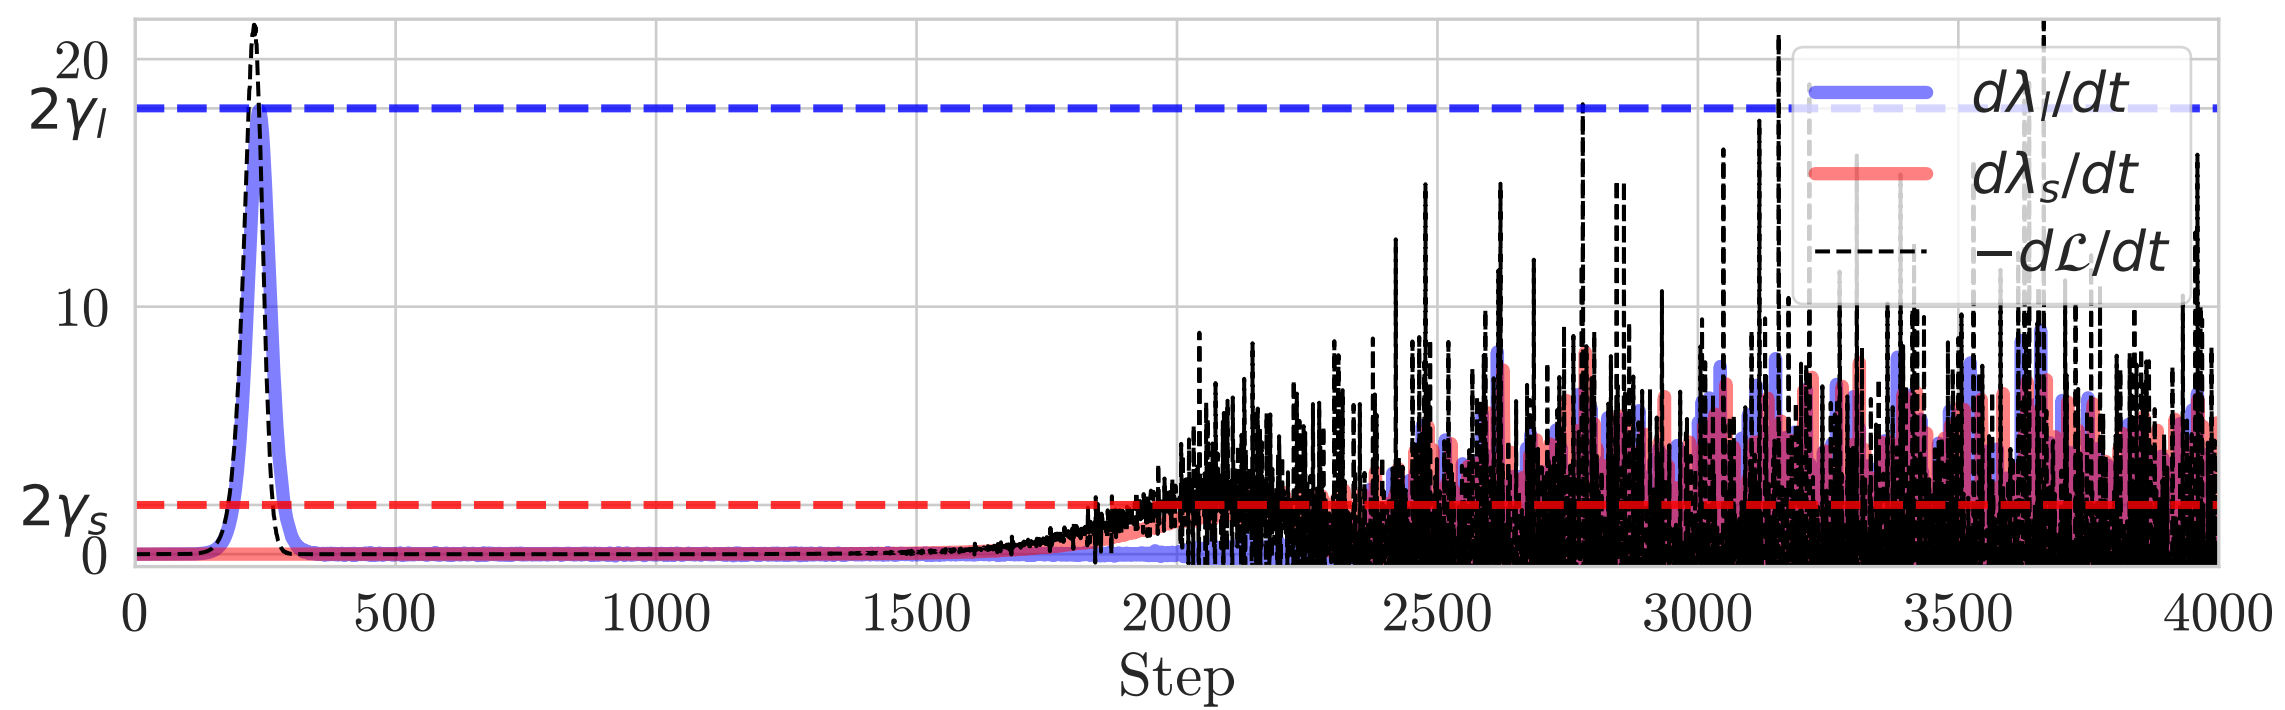

Supplement: supplementary_material [file dim_dcdt_dldt.pdf › iclr2026/iclr/feature_preference/theoretical/old/figure/dim_dcdt_dldt.pdf]

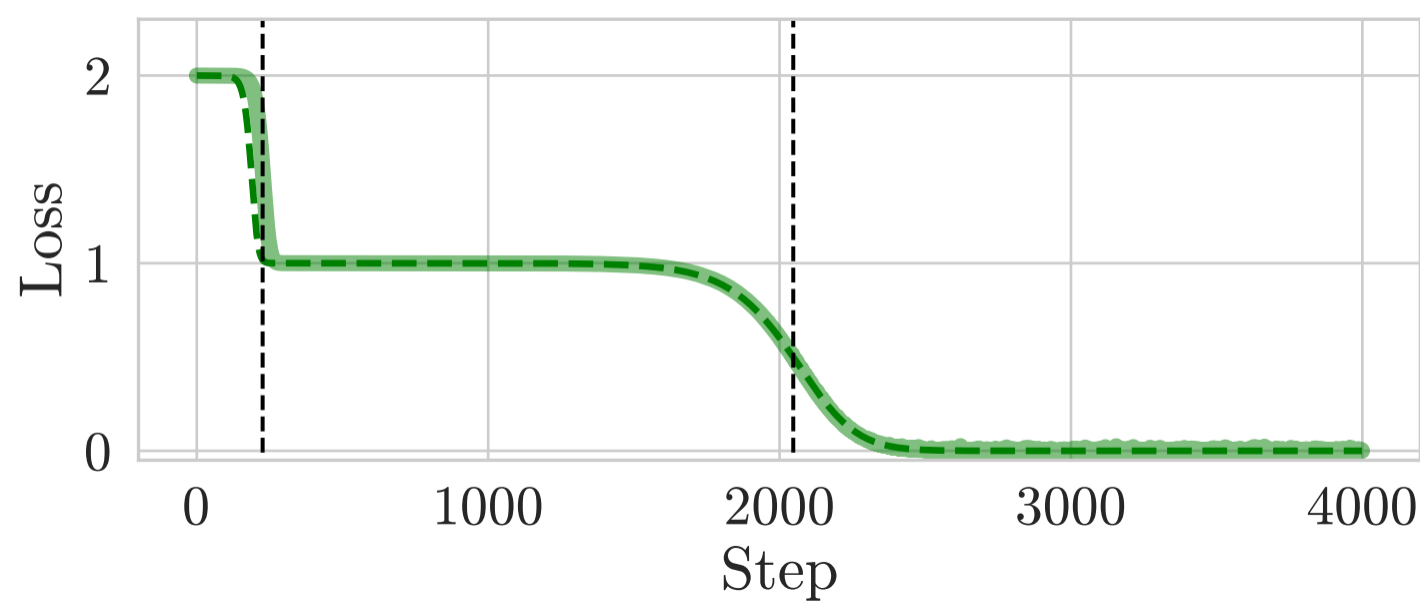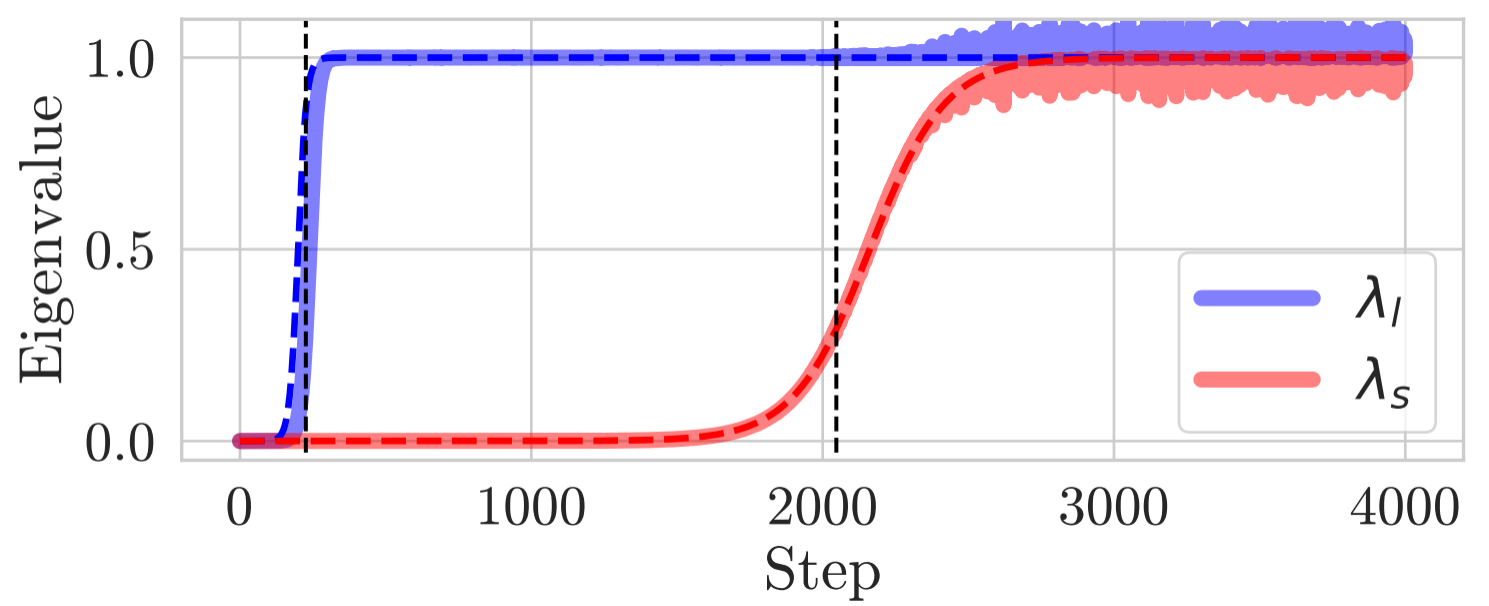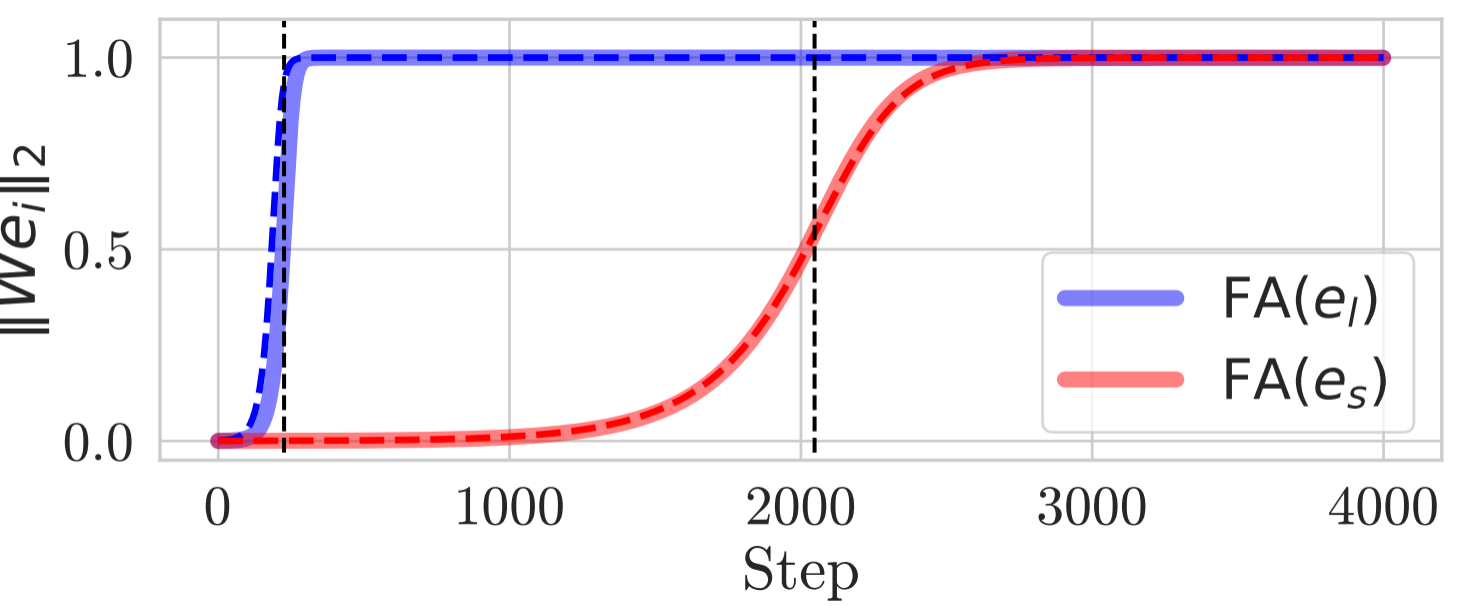

Supplement: supplementary_material [file dim_loss_eig_align.pdf › iclr2026/iclr/feature_preference/theoretical/old/figure/dim_loss_eig_align.pdf]

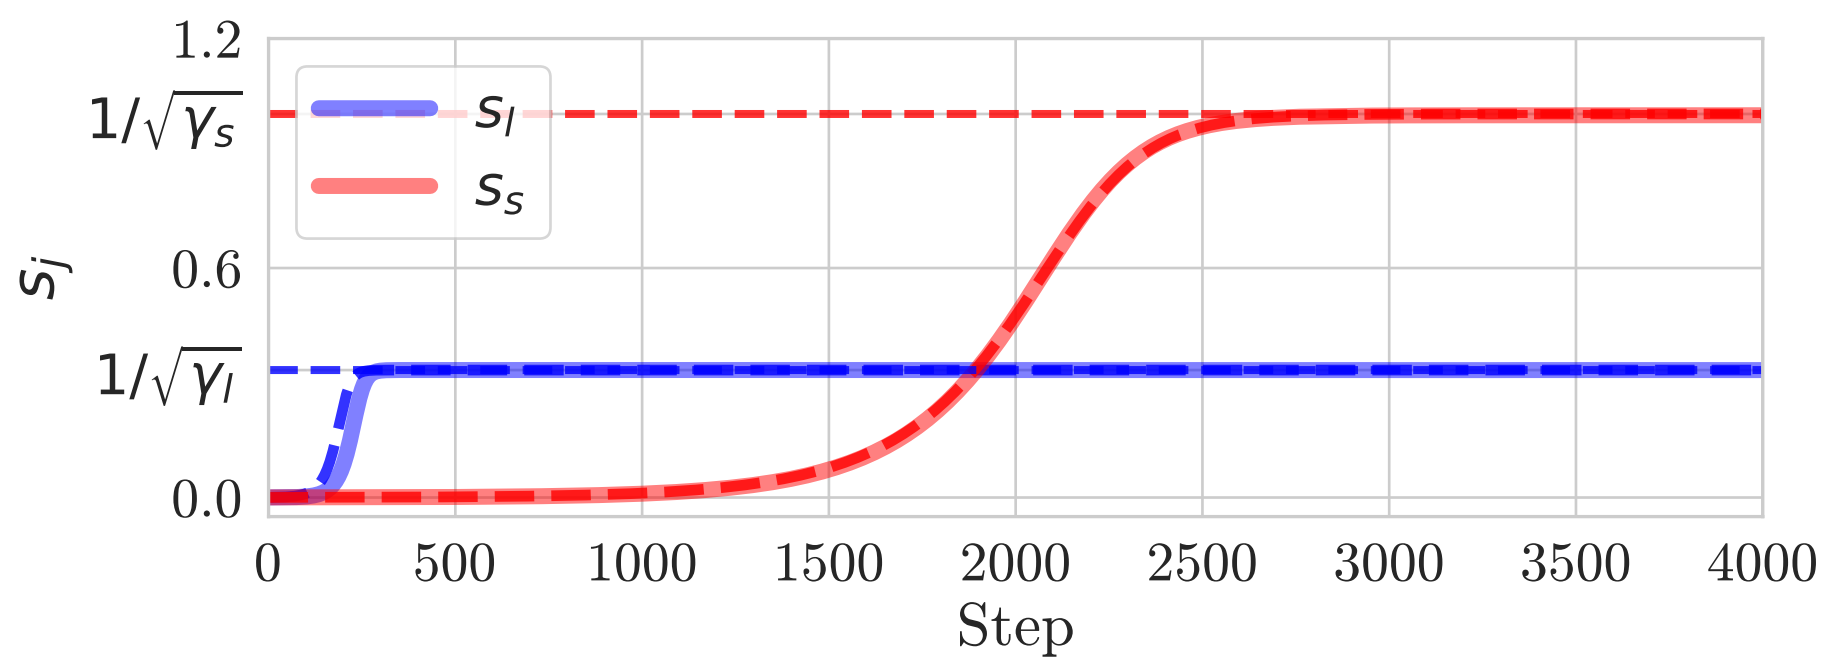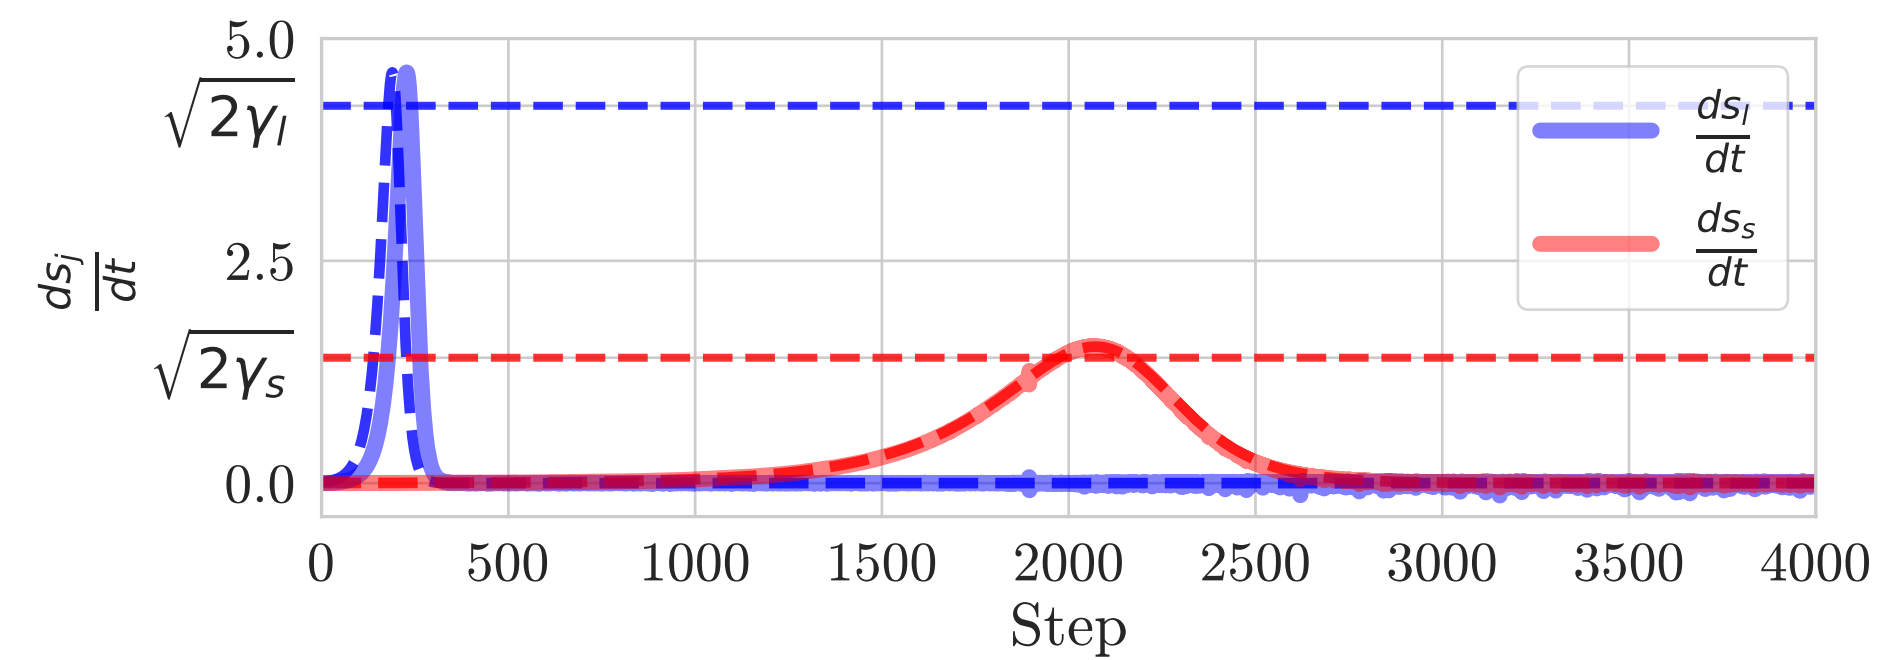

Supplement: supplementary_material [file dim_s_ds_dt.pdf › iclr2026/iclr/feature_preference/theoretical/old/figure/dim_s_ds_dt.pdf]

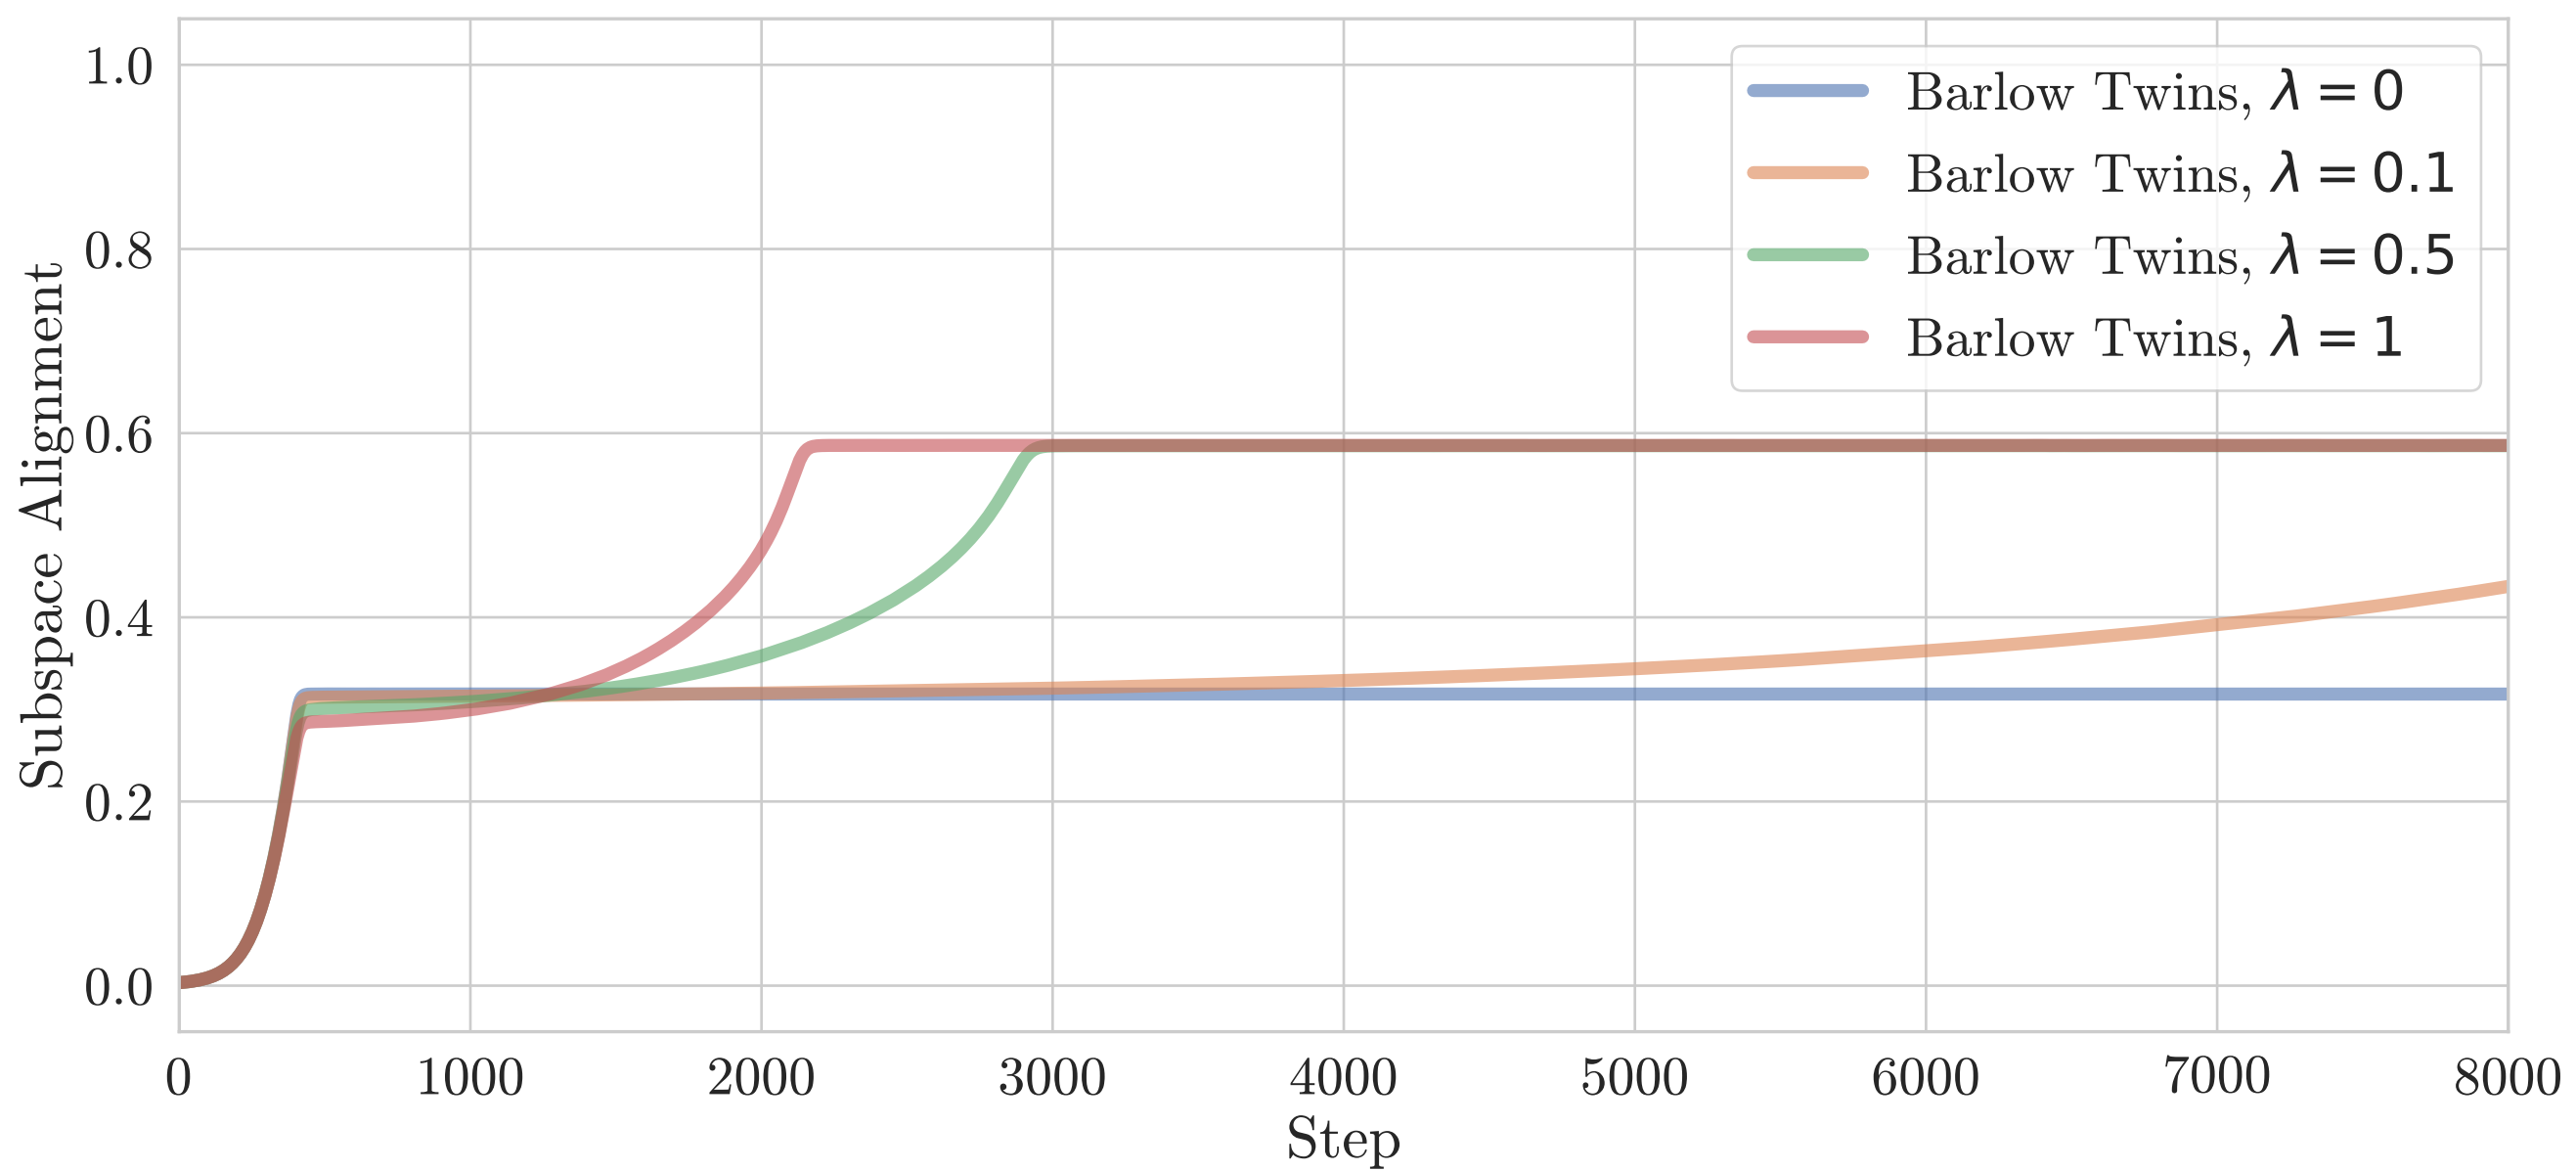

Supplement: supplementary_material [file amp_alignment.pdf › iclr2026/iclr/frequency_shortcut/theoretical/deep/figure/amp_alignment.pdf]

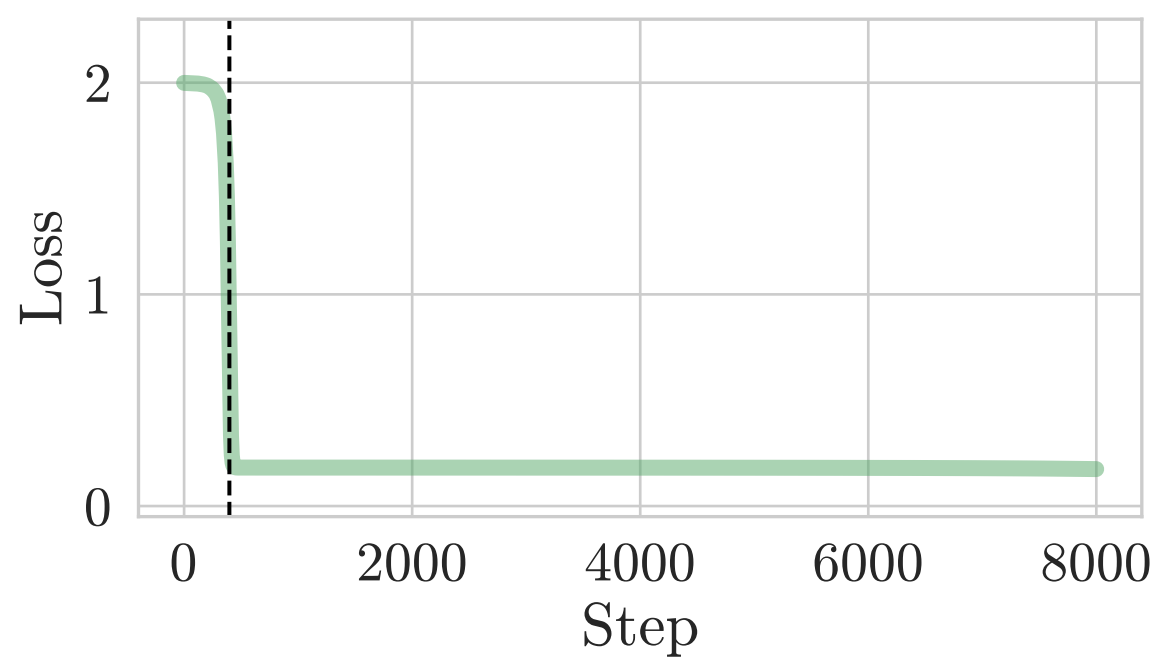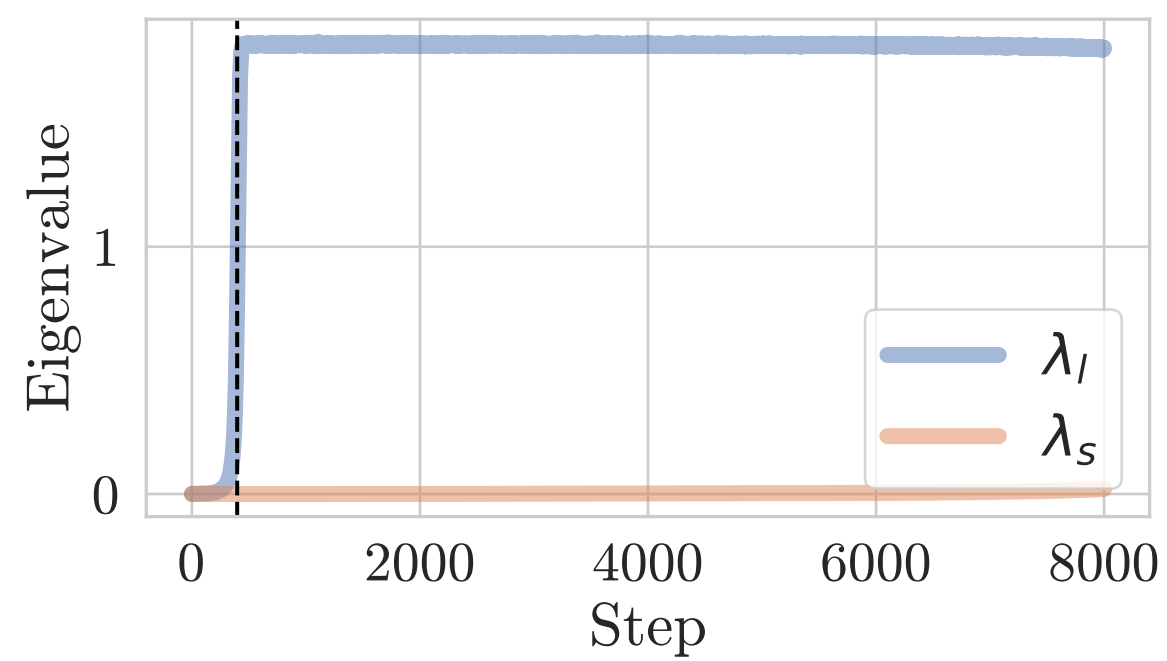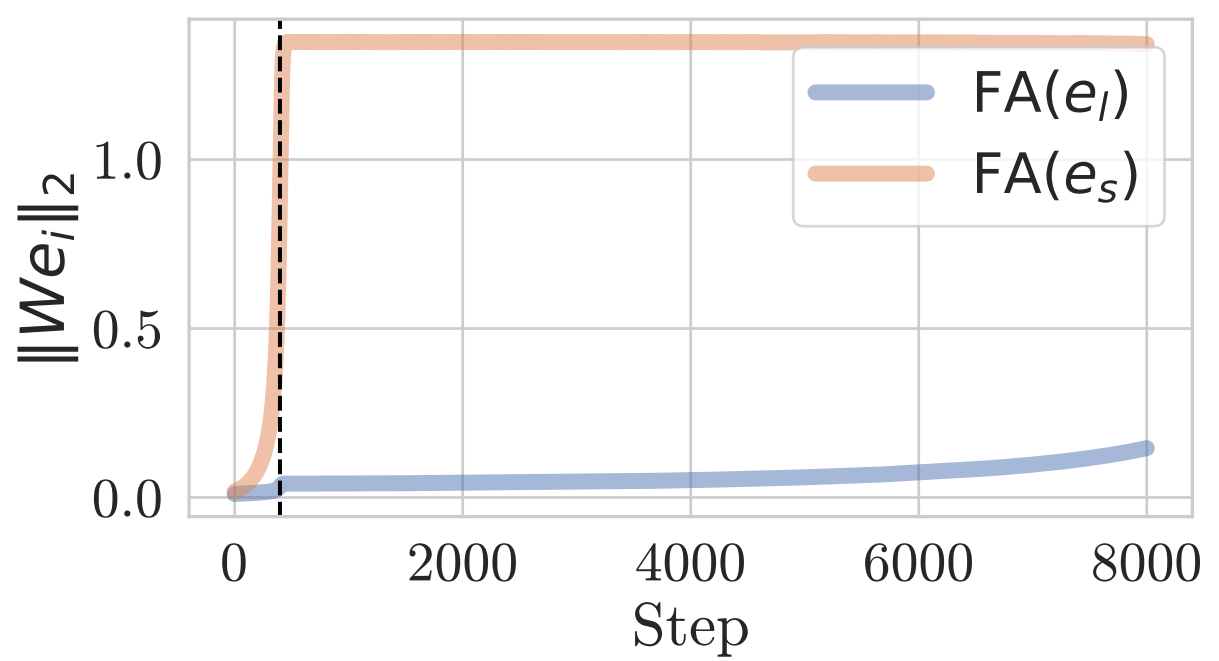

Supplement: supplementary_material [file amp_loss_eig_align_BarlowTwins_0.1.pdf › iclr2026/iclr/frequency_shortcut/theoretical/deep/figure/amp_loss_eig_align_BarlowTwins_0.1.pdf]

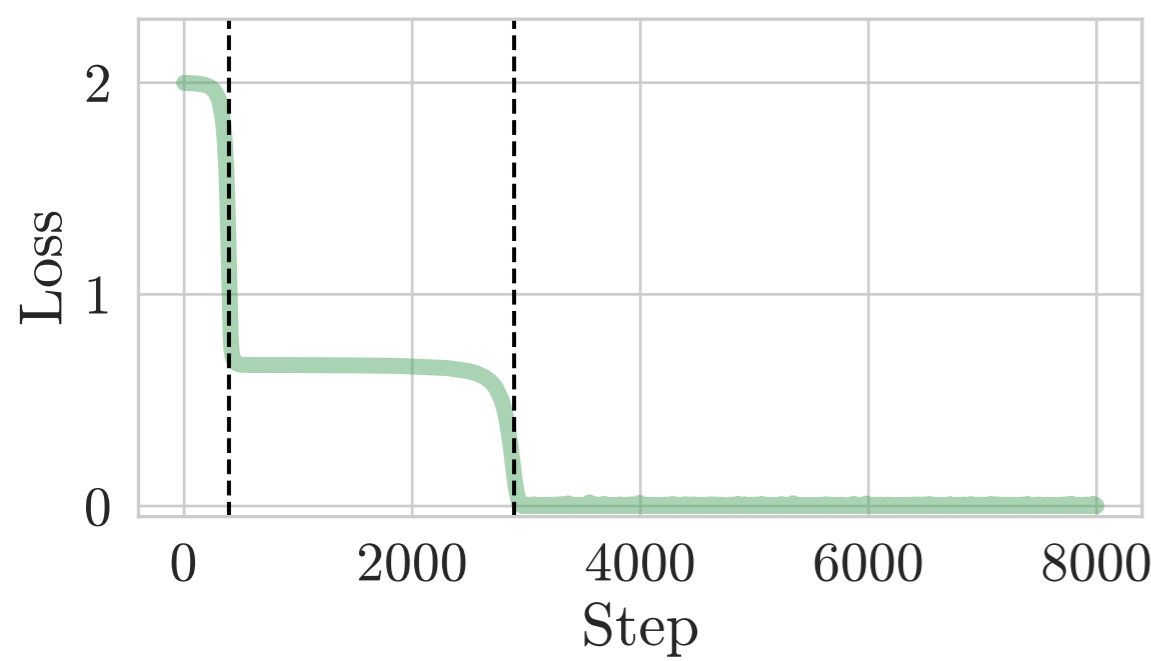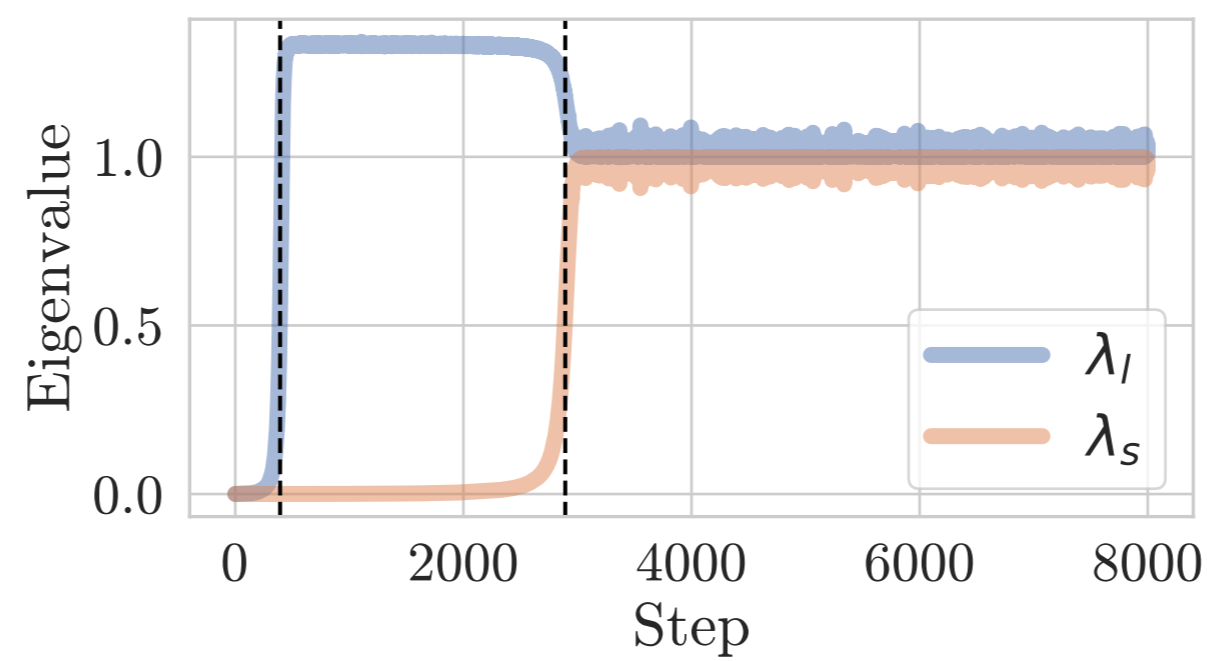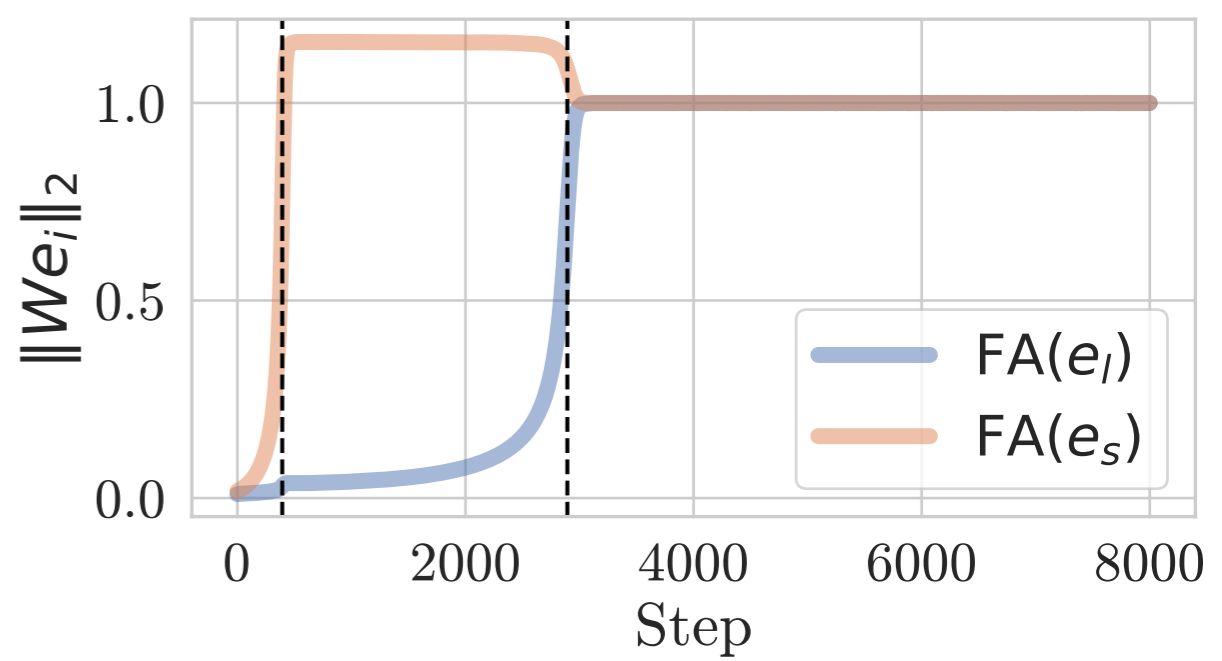

Supplement: supplementary_material [file amp_loss_eig_align_BarlowTwins_0.5.pdf › iclr2026/iclr/frequency_shortcut/theoretical/deep/figure/amp_loss_eig_align_BarlowTwins_0.5.pdf]

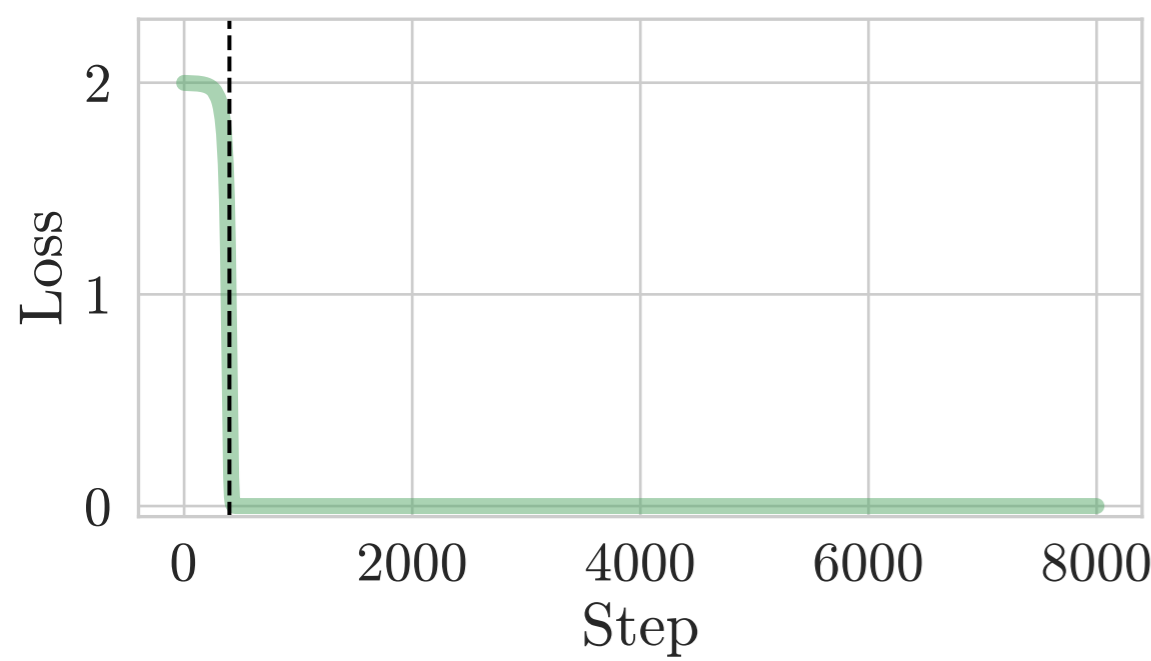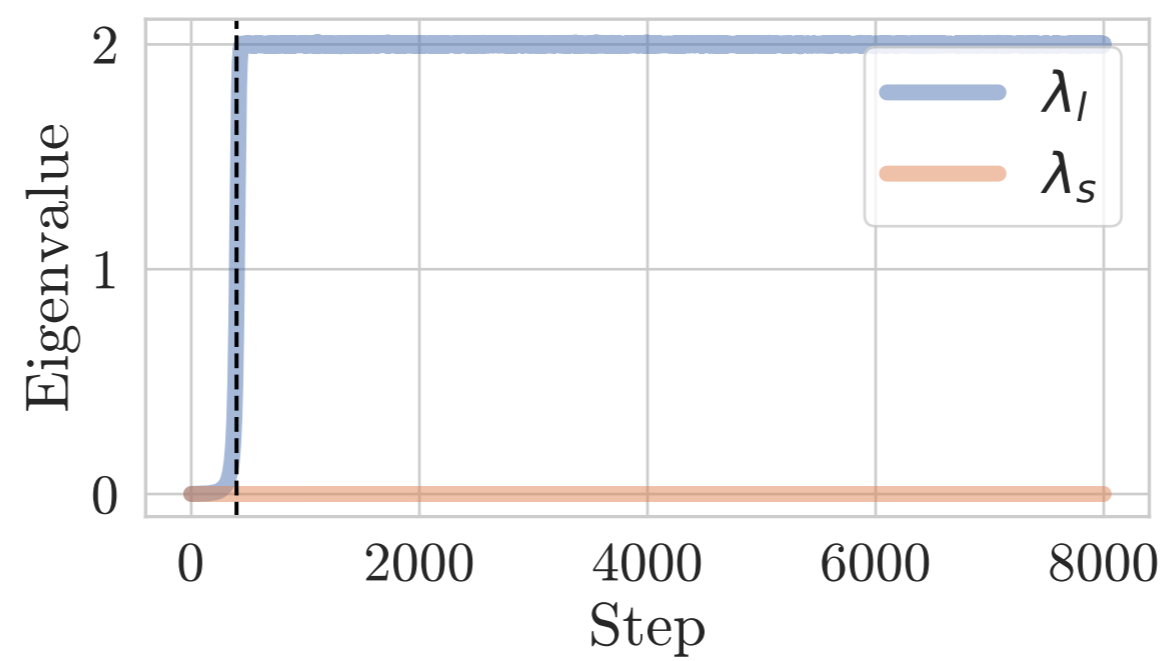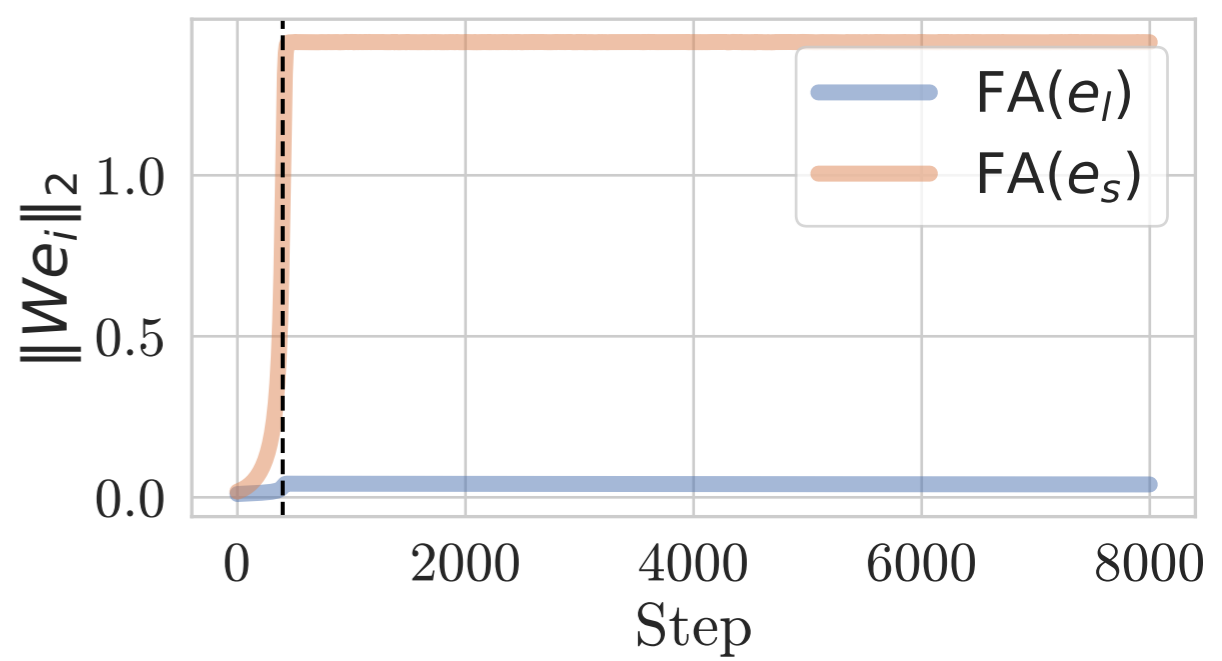

Supplement: supplementary_material [file amp_loss_eig_align_BarlowTwins_0.pdf › iclr2026/iclr/frequency_shortcut/theoretical/deep/figure/amp_loss_eig_align_BarlowTwins_0.pdf]

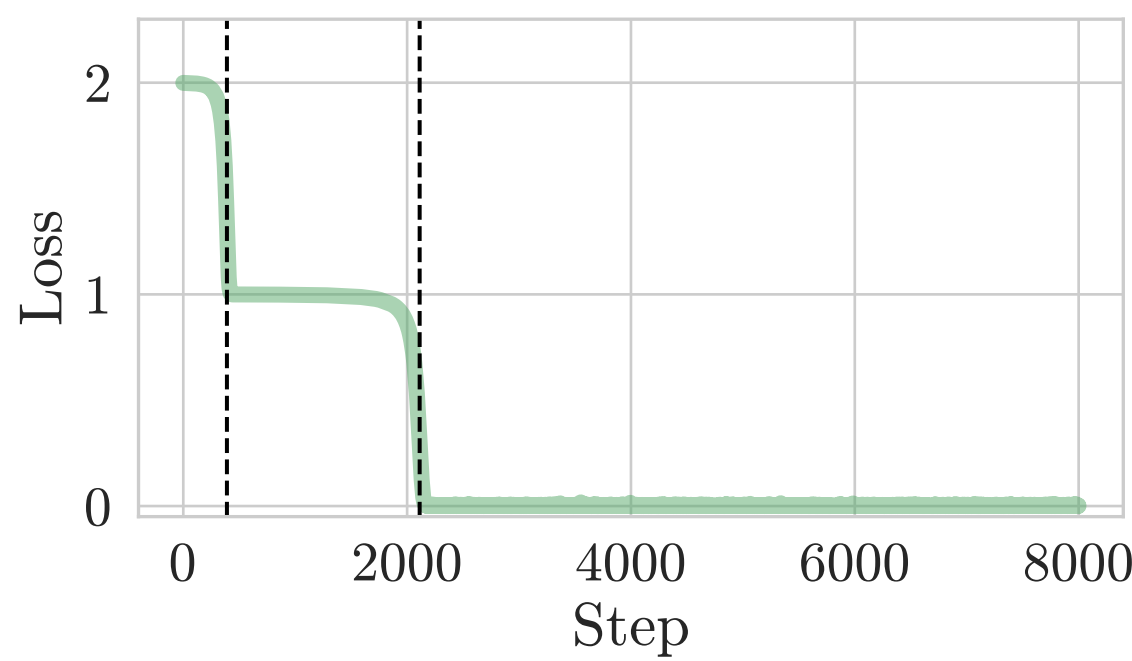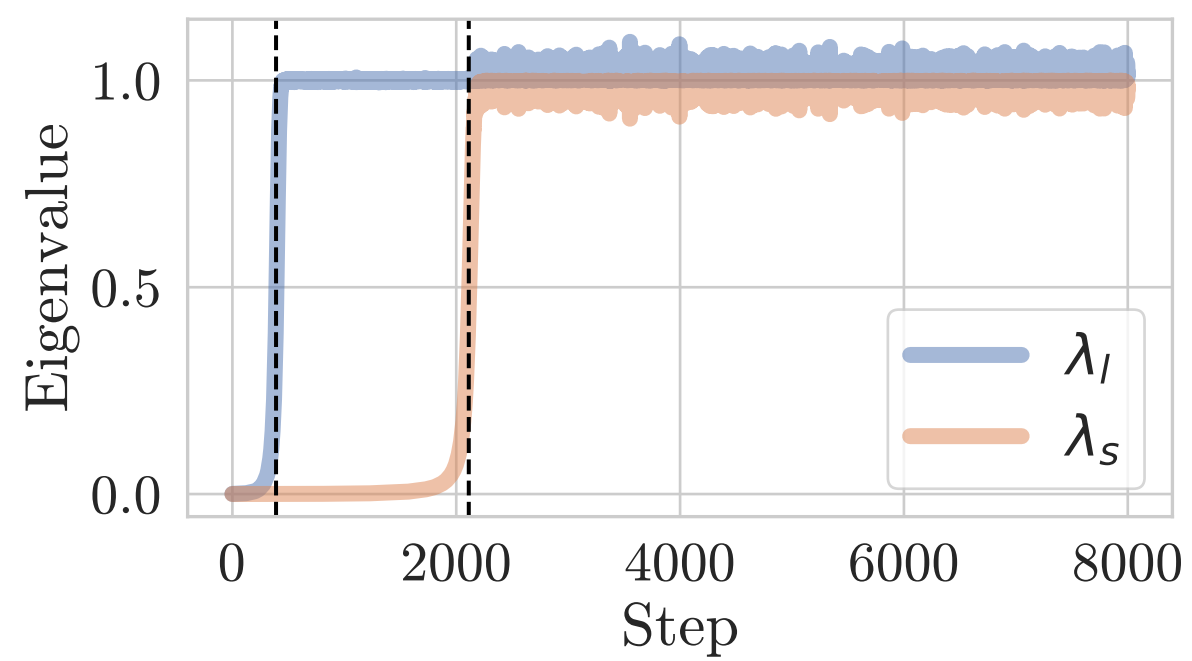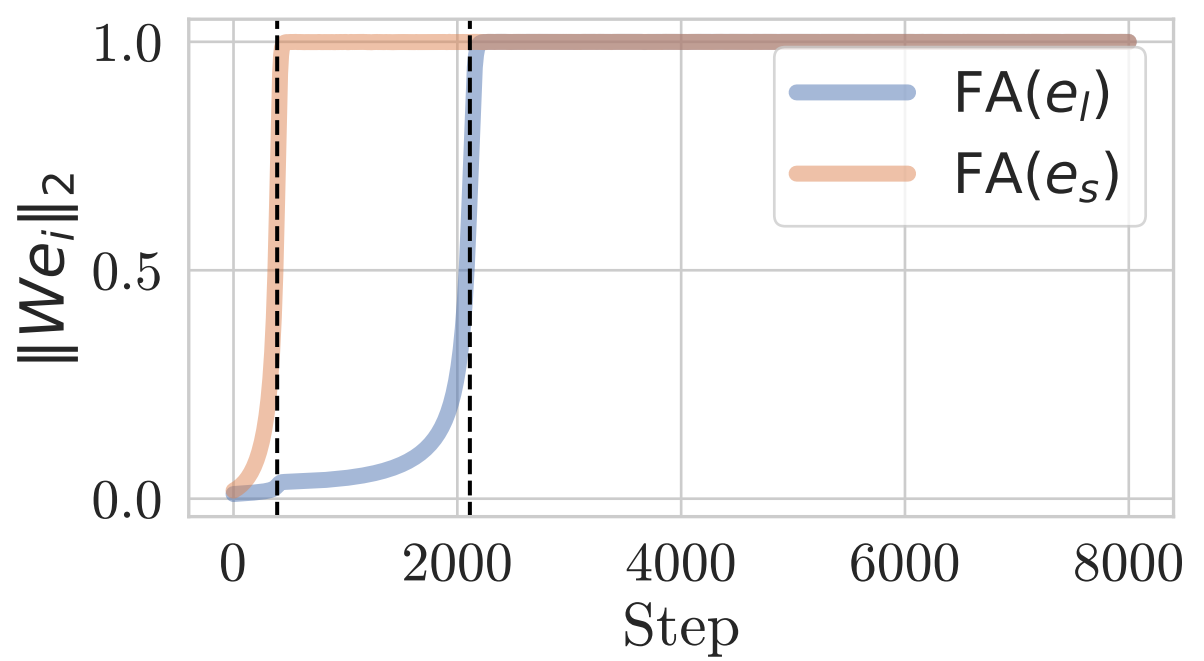

Supplement: supplementary_material [file amp_loss_eig_align_BarlowTwins_1.pdf › iclr2026/iclr/frequency_shortcut/theoretical/deep/figure/amp_loss_eig_align_BarlowTwins_1.pdf]

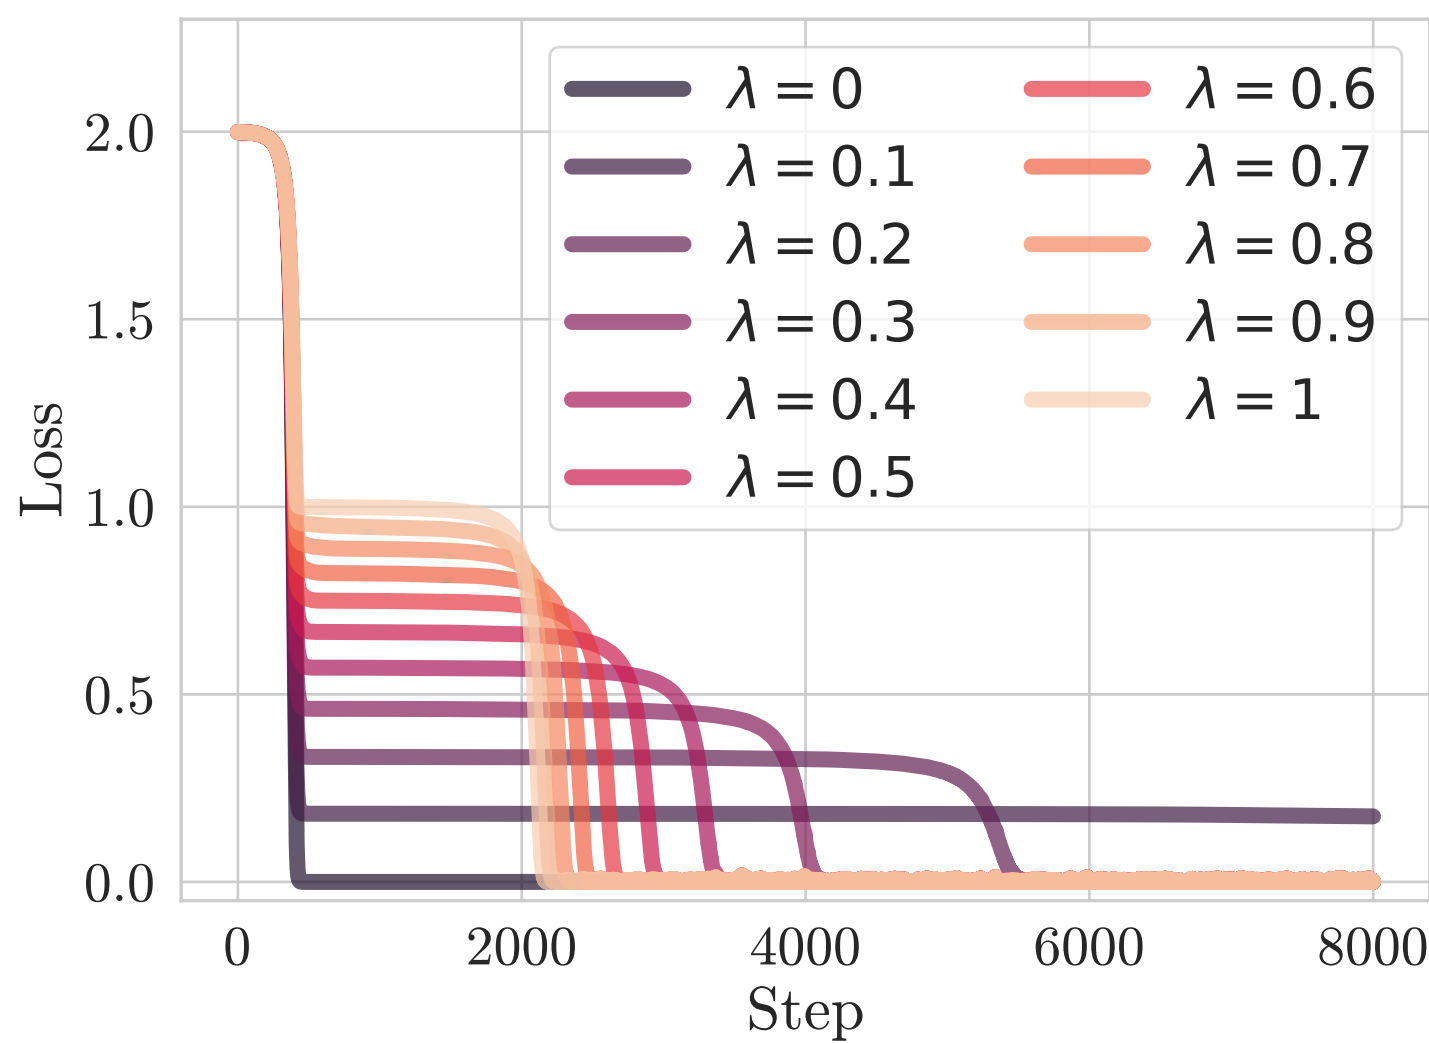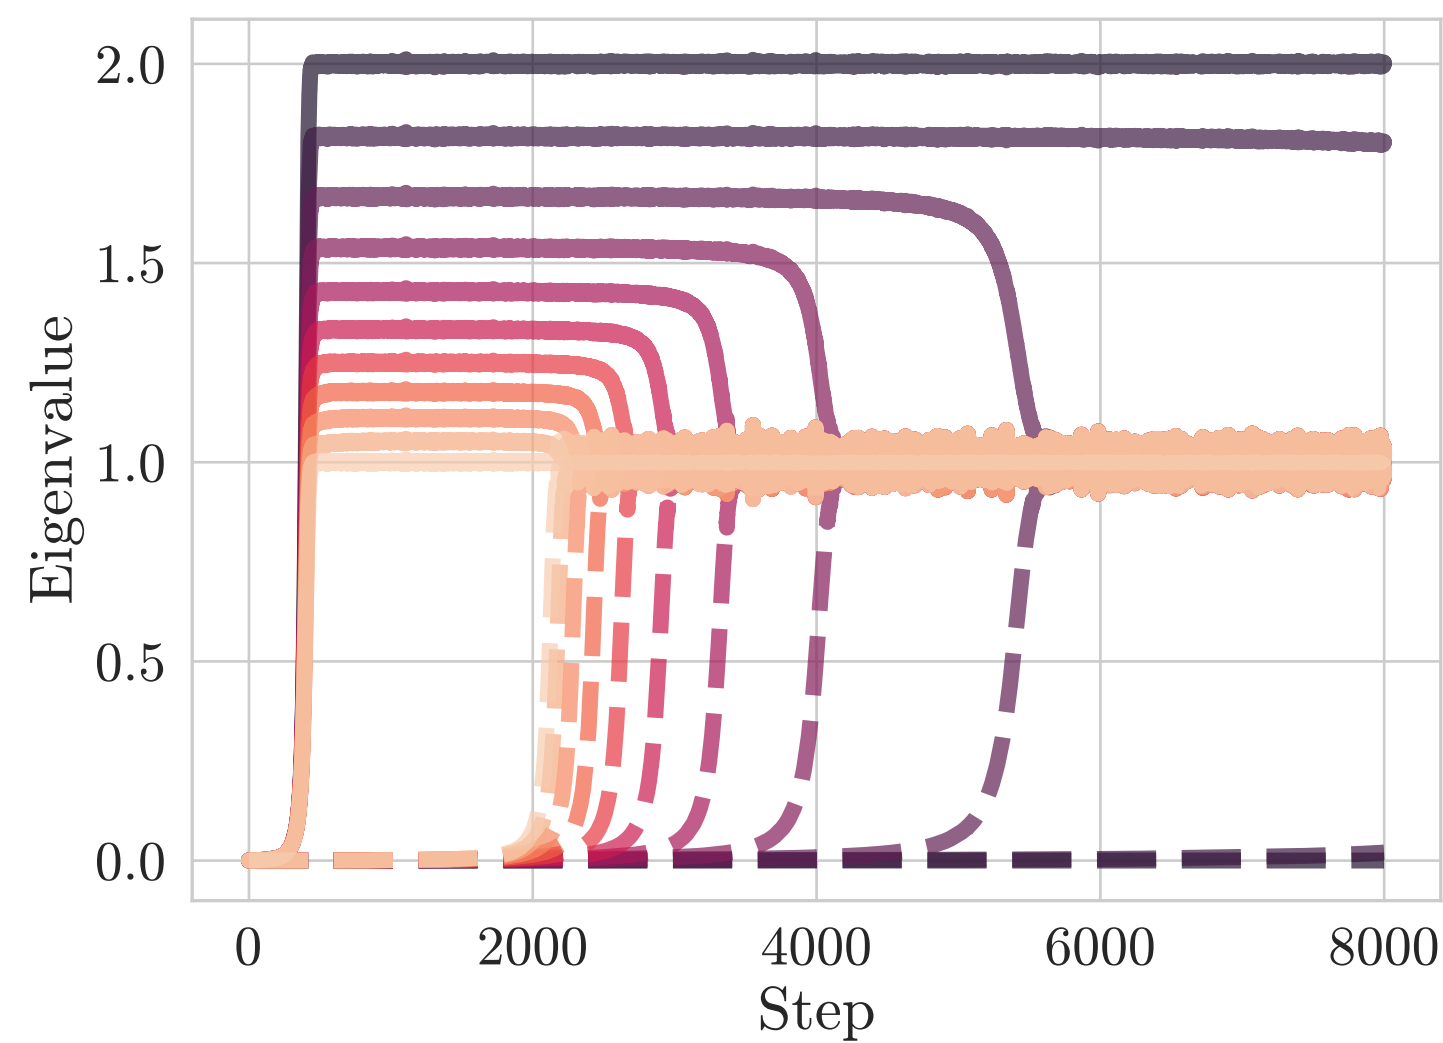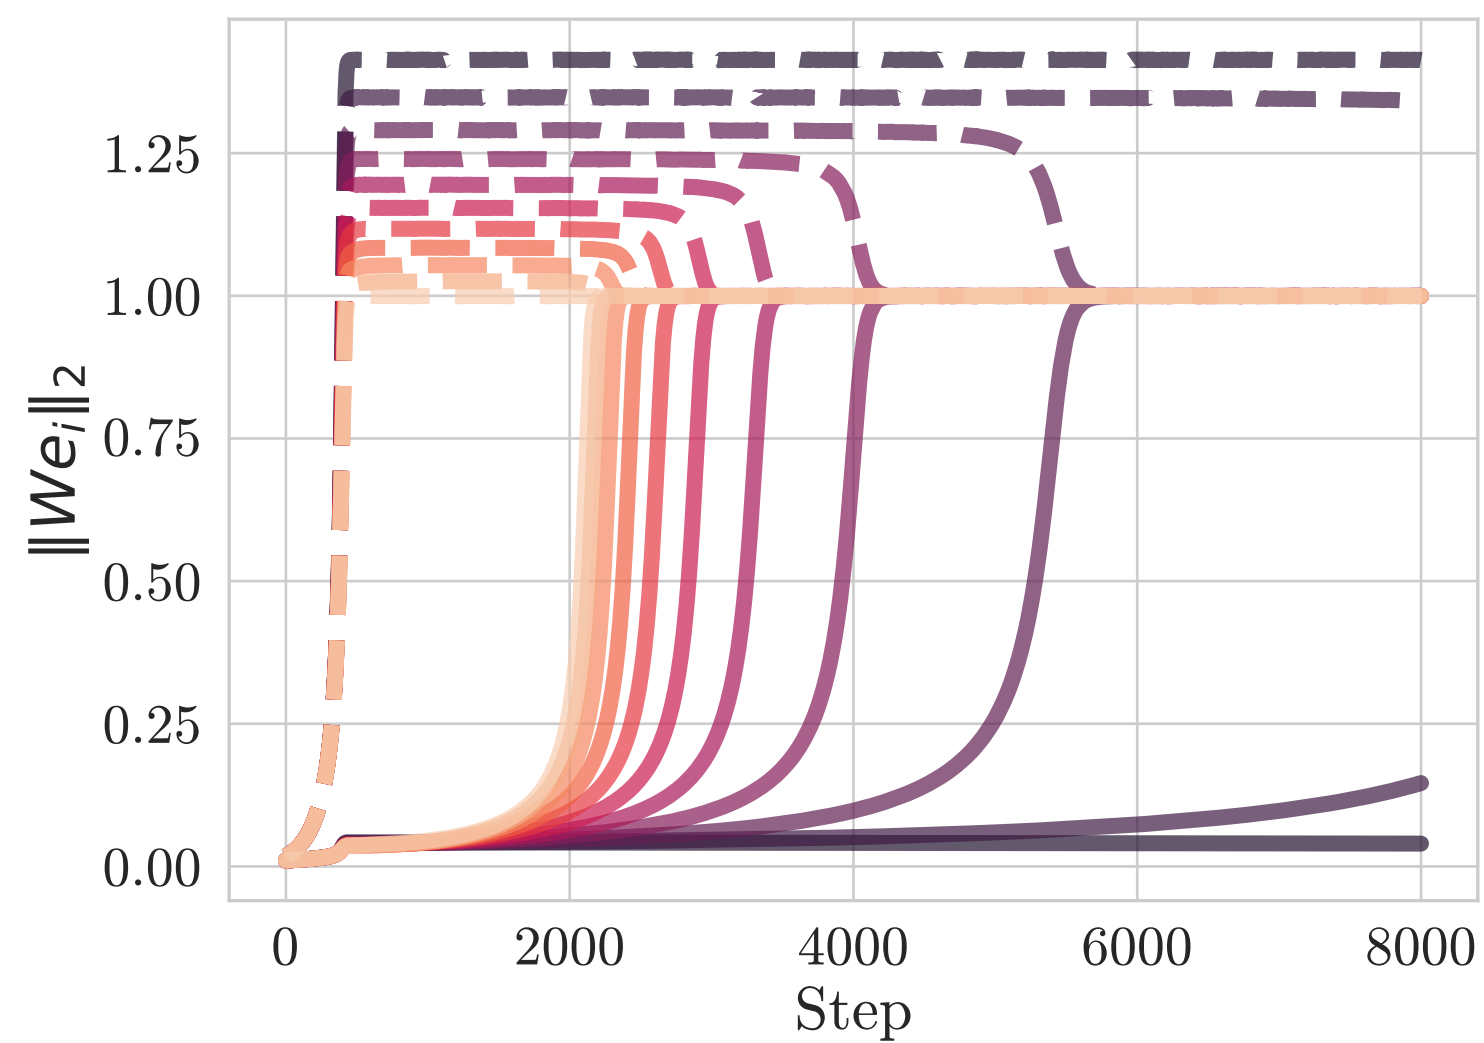

Supplement: supplementary_material [file loss_lambda_all.pdf › iclr2026/iclr/frequency_shortcut/theoretical/deep/figure/loss_lambda_all.pdf]

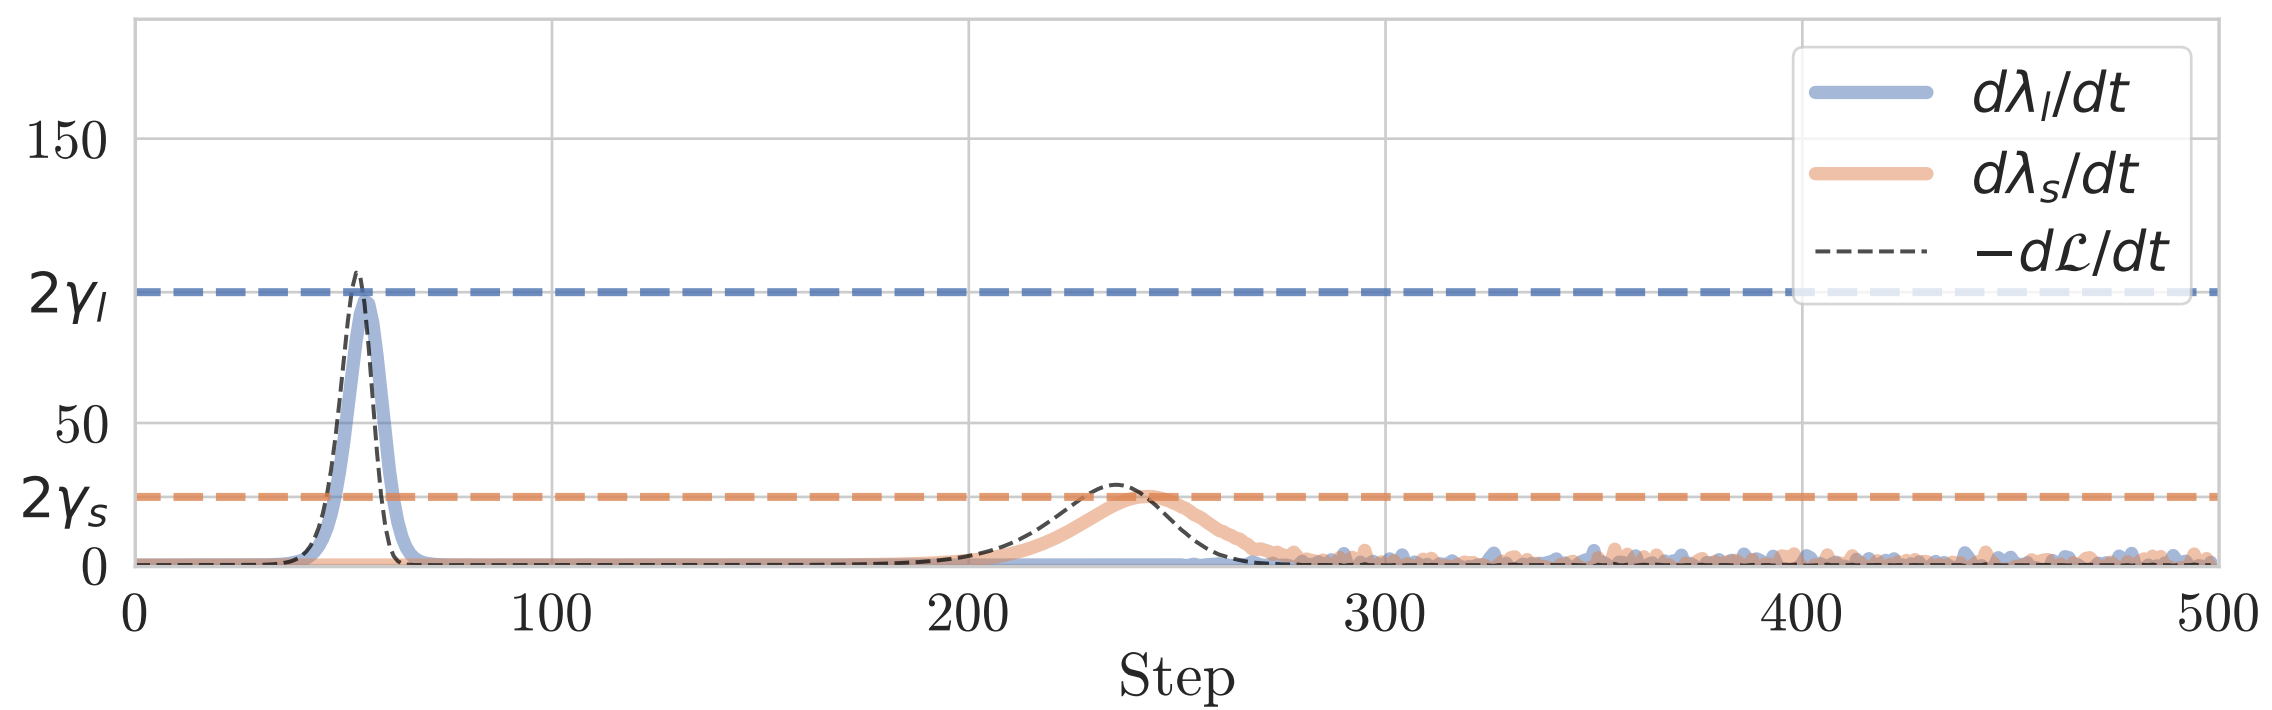

Supplement: supplementary_material [file dim_dcdt_dldt.pdf › iclr2026/iclr/frequency_shortcut/theoretical/linear/figure/dim_dcdt_dldt.pdf]

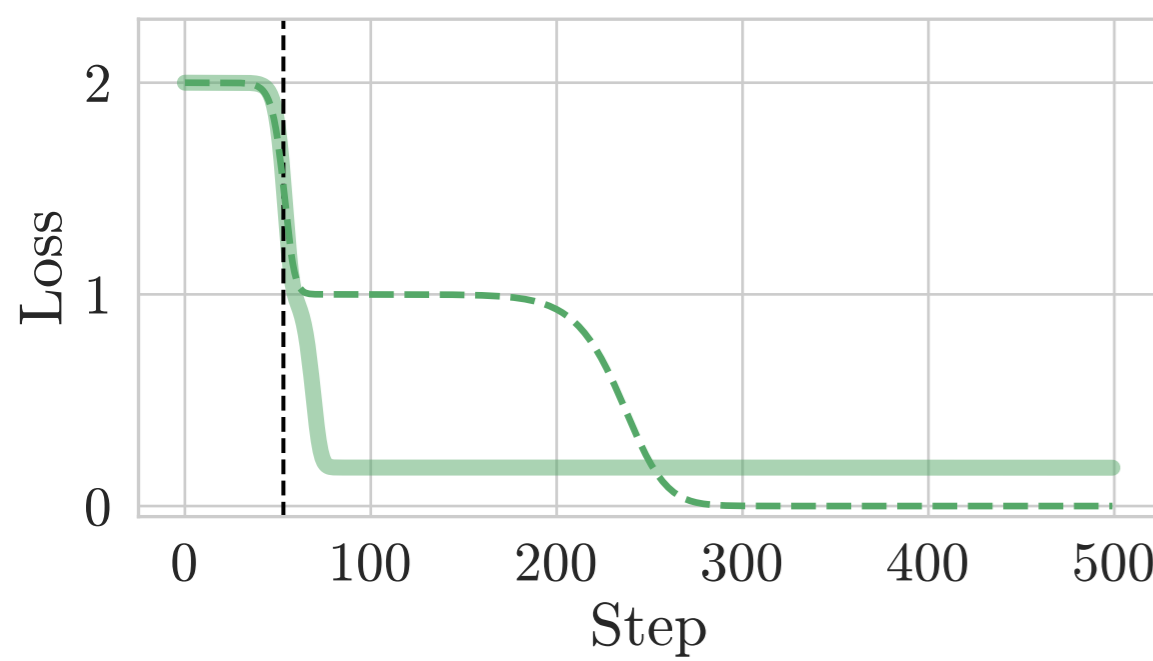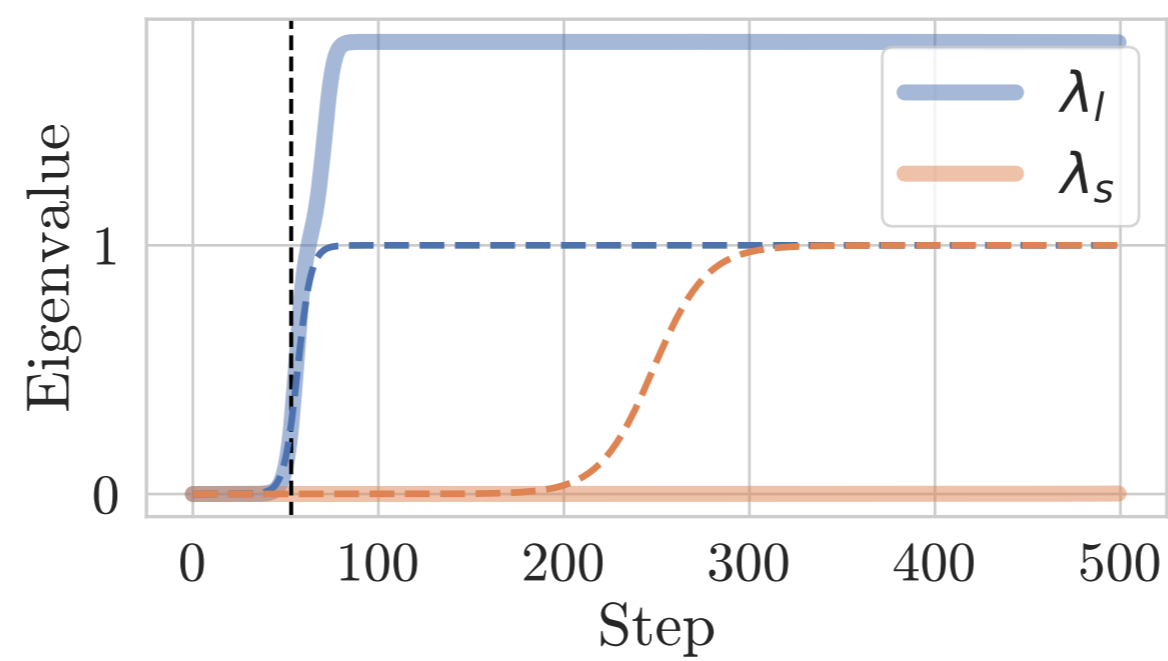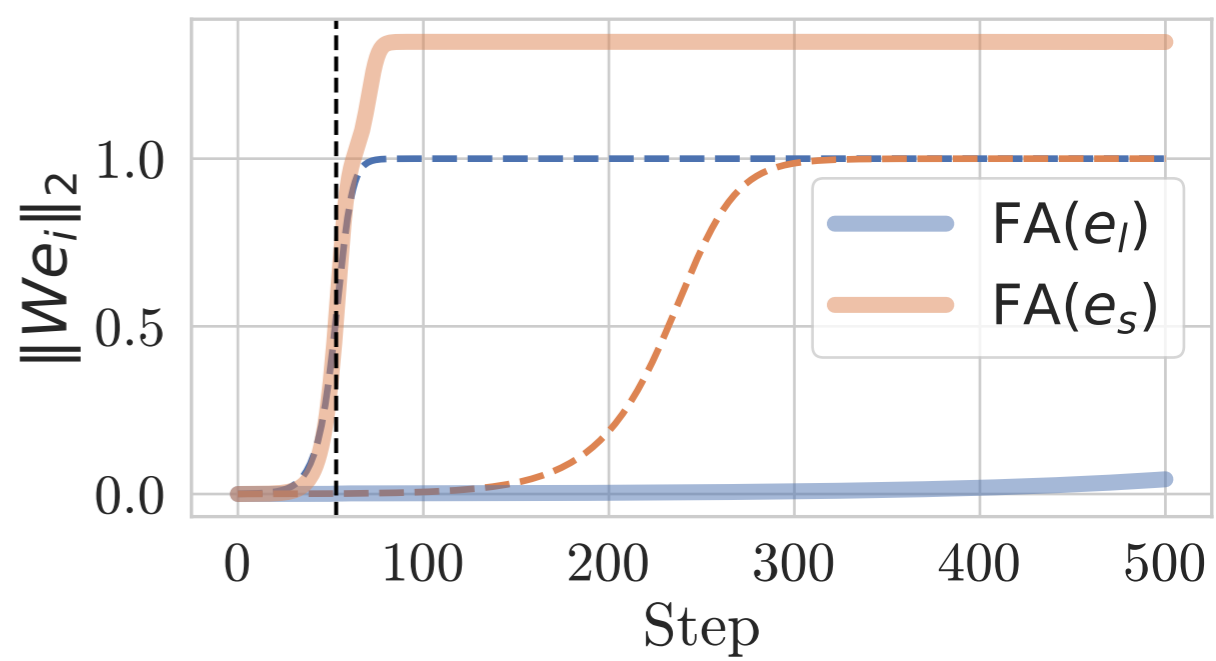

Supplement: supplementary_material [file dim_loss_eig_align_BarlowTwins_0.1.pdf › iclr2026/iclr/frequency_shortcut/theoretical/linear/figure/dim_loss_eig_align_BarlowTwins_0.1.pdf]

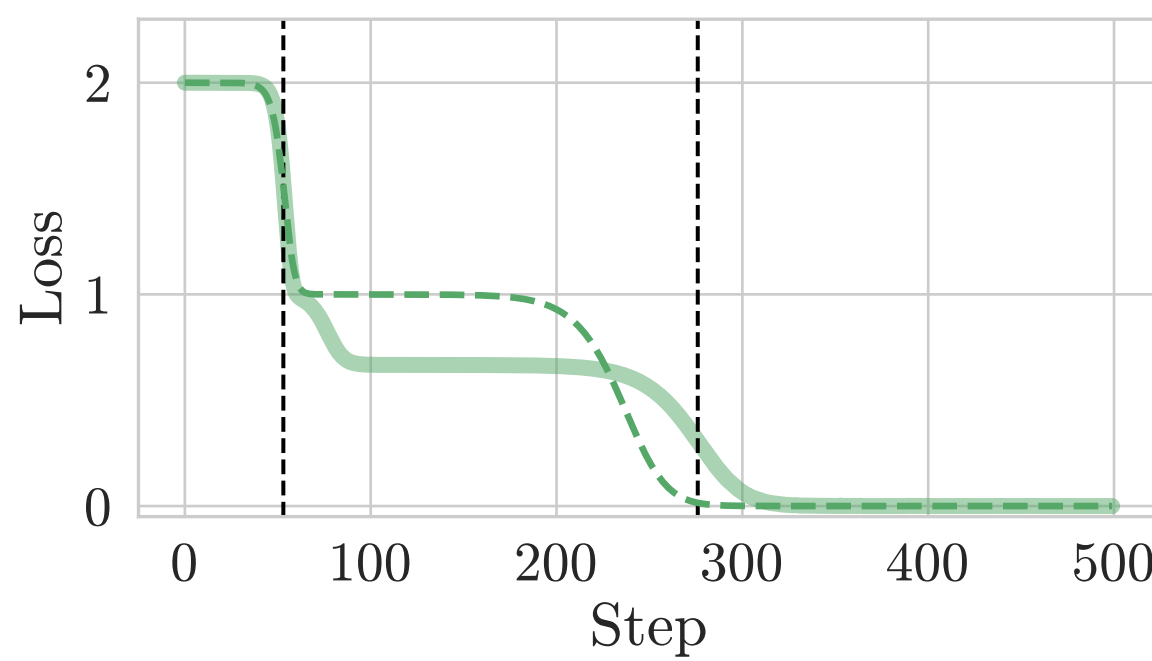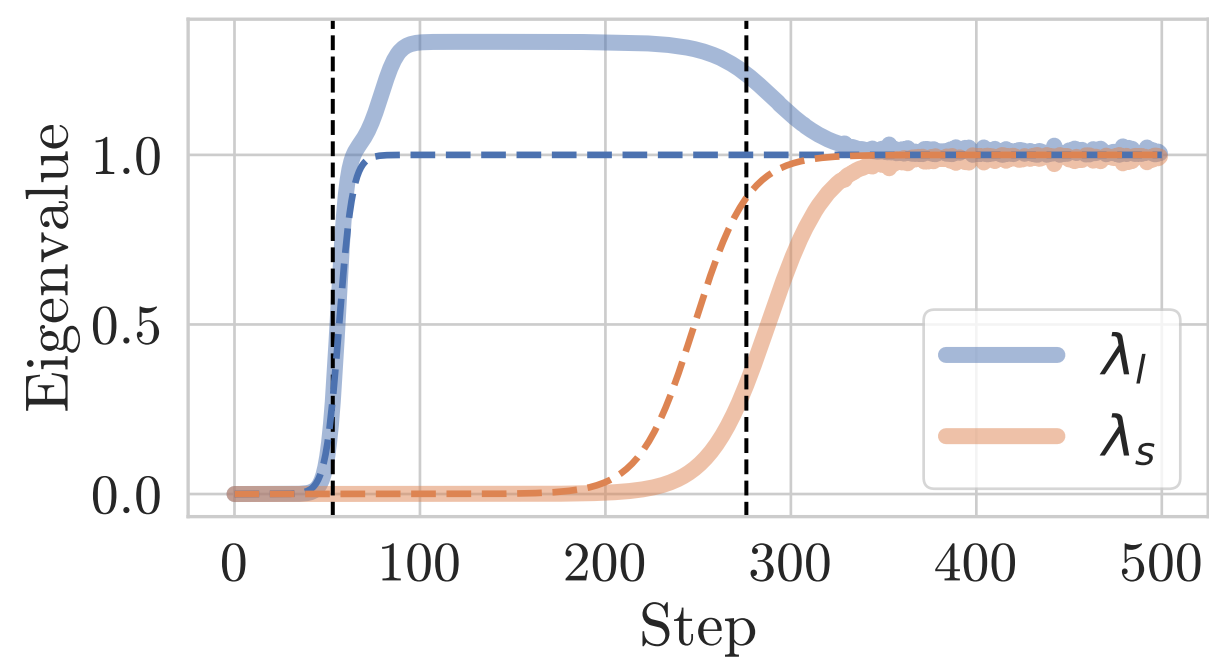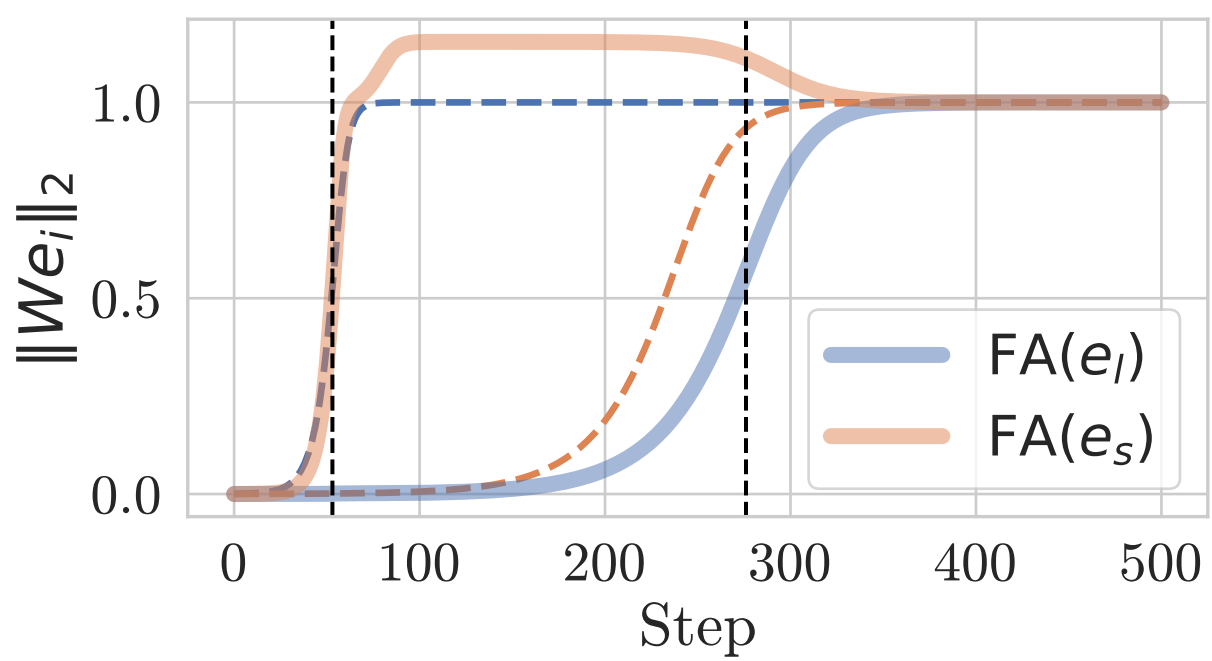

Supplement: supplementary_material [file dim_loss_eig_align_BarlowTwins_0.5.pdf › iclr2026/iclr/frequency_shortcut/theoretical/linear/figure/dim_loss_eig_align_BarlowTwins_0.5.pdf]

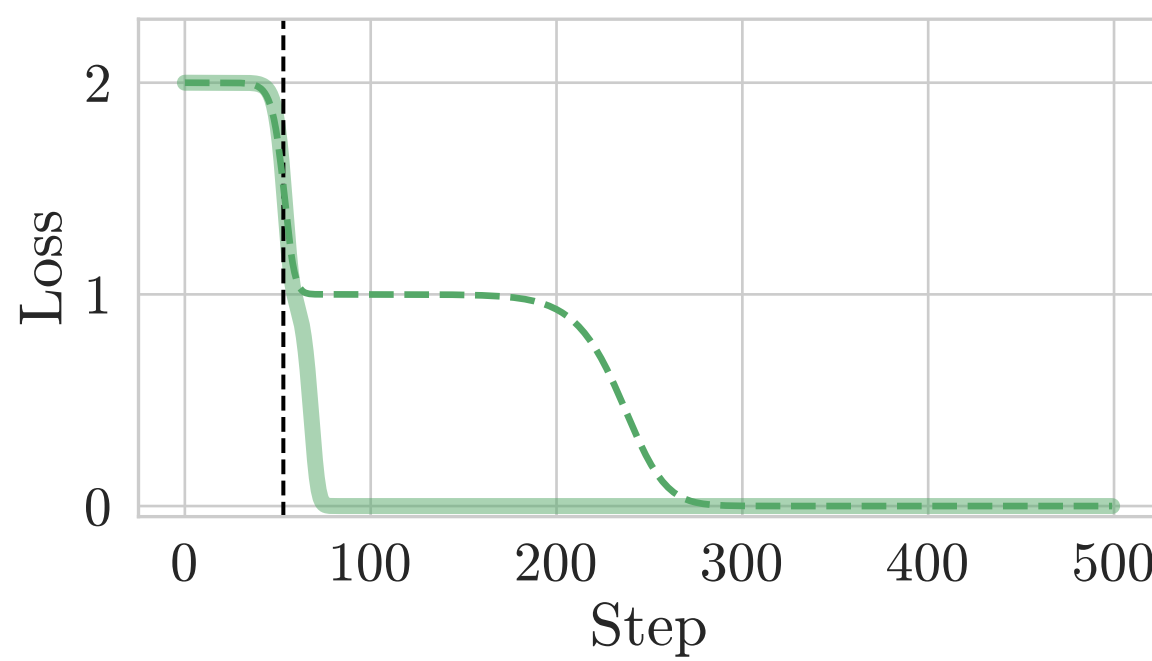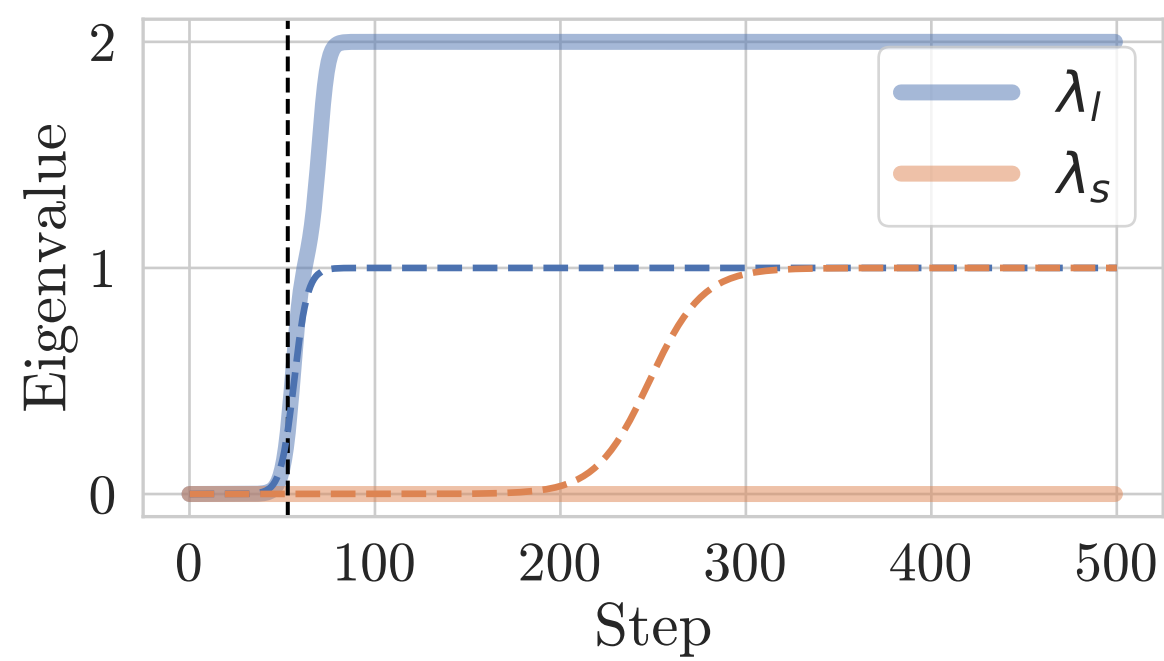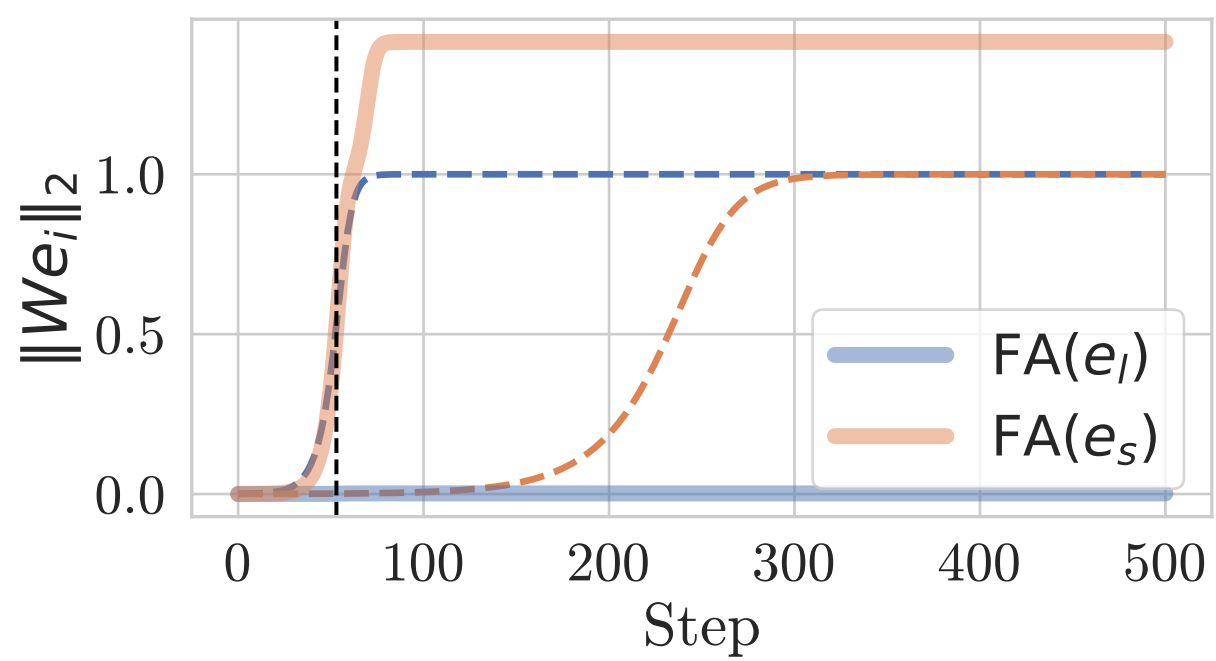

Supplement: supplementary_material [file dim_loss_eig_align_BarlowTwins_0.pdf › iclr2026/iclr/frequency_shortcut/theoretical/linear/figure/dim_loss_eig_align_BarlowTwins_0.pdf]

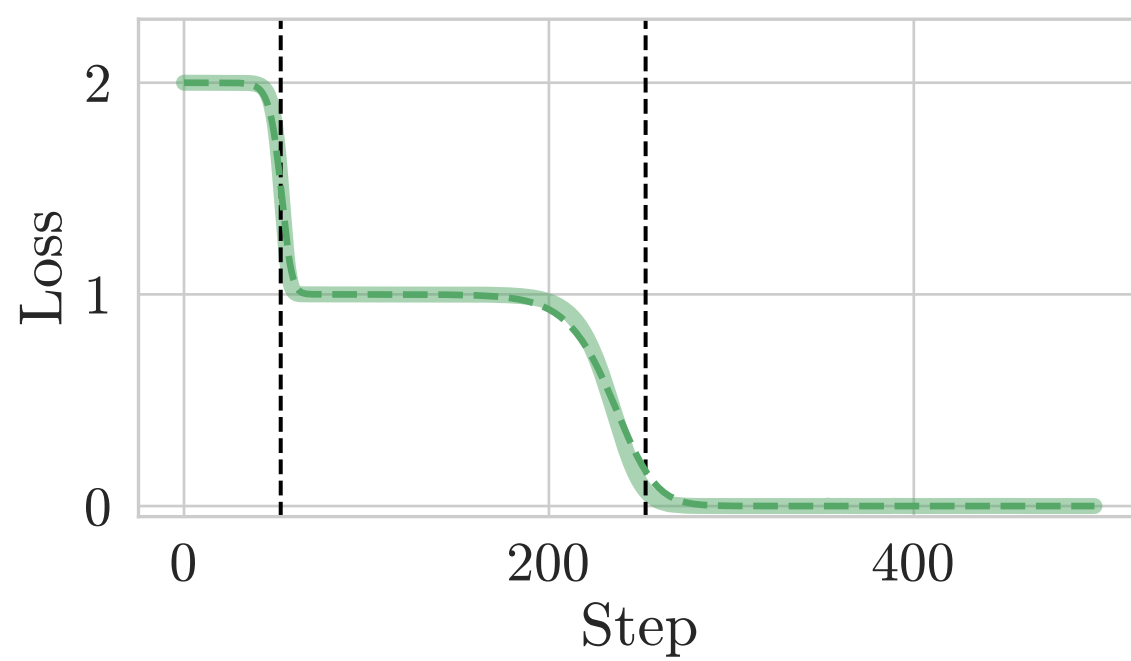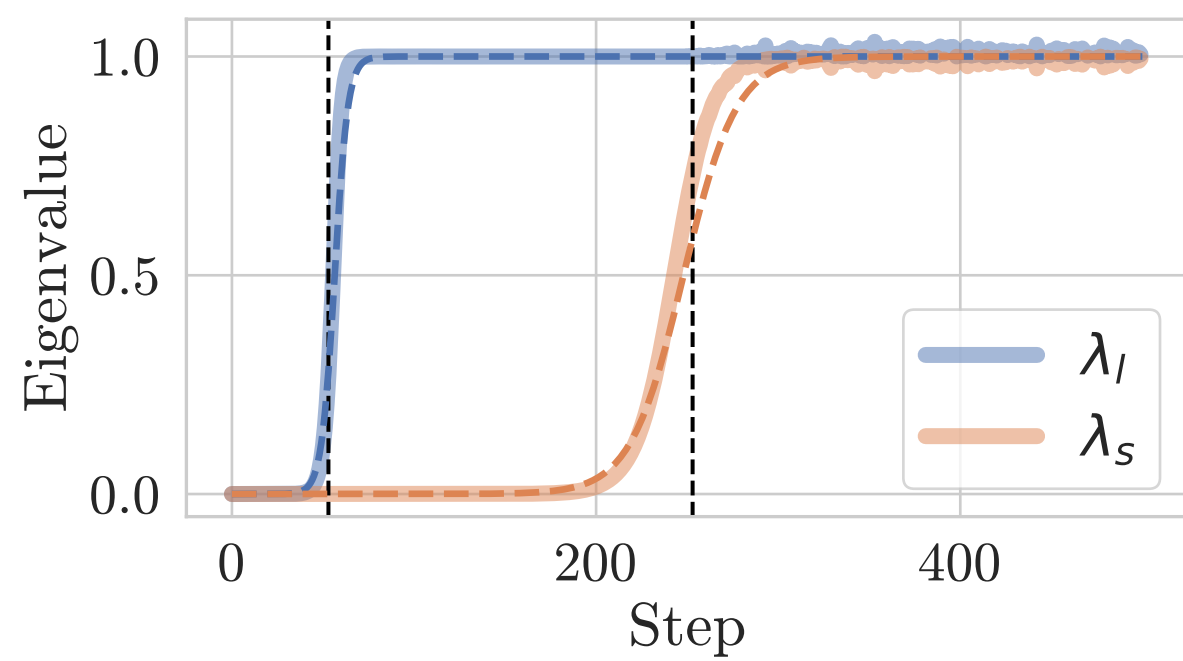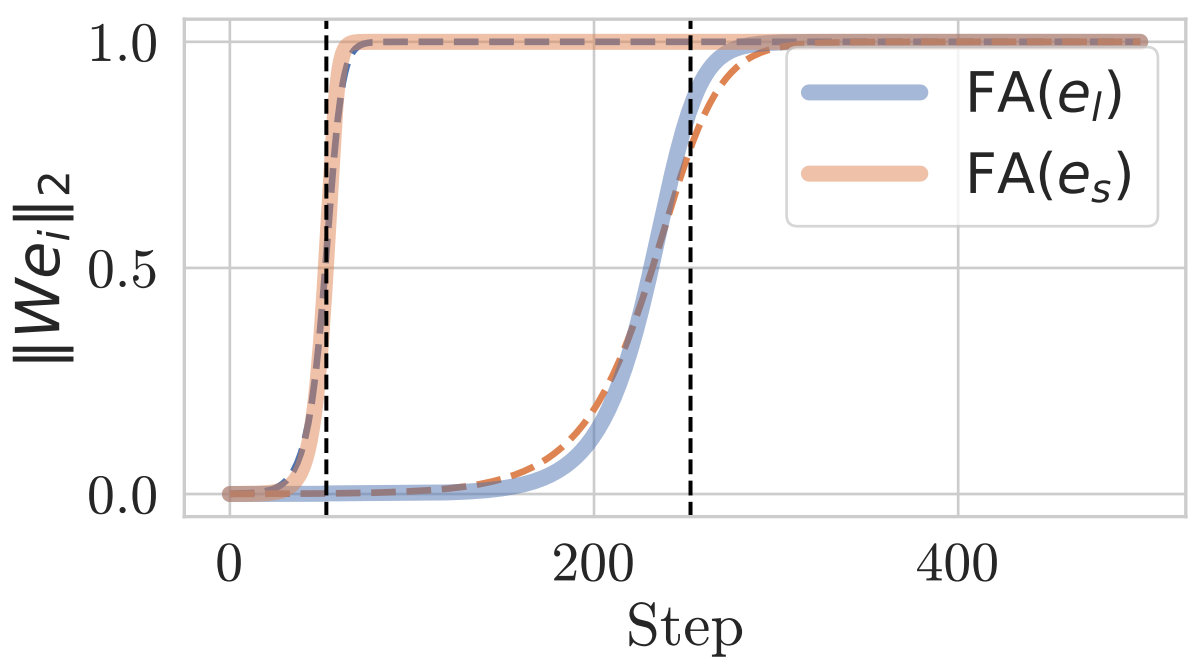

Supplement: supplementary_material [file dim_loss_eig_align_BarlowTwins_1.pdf › iclr2026/iclr/frequency_shortcut/theoretical/linear/figure/dim_loss_eig_align_BarlowTwins_1.pdf]

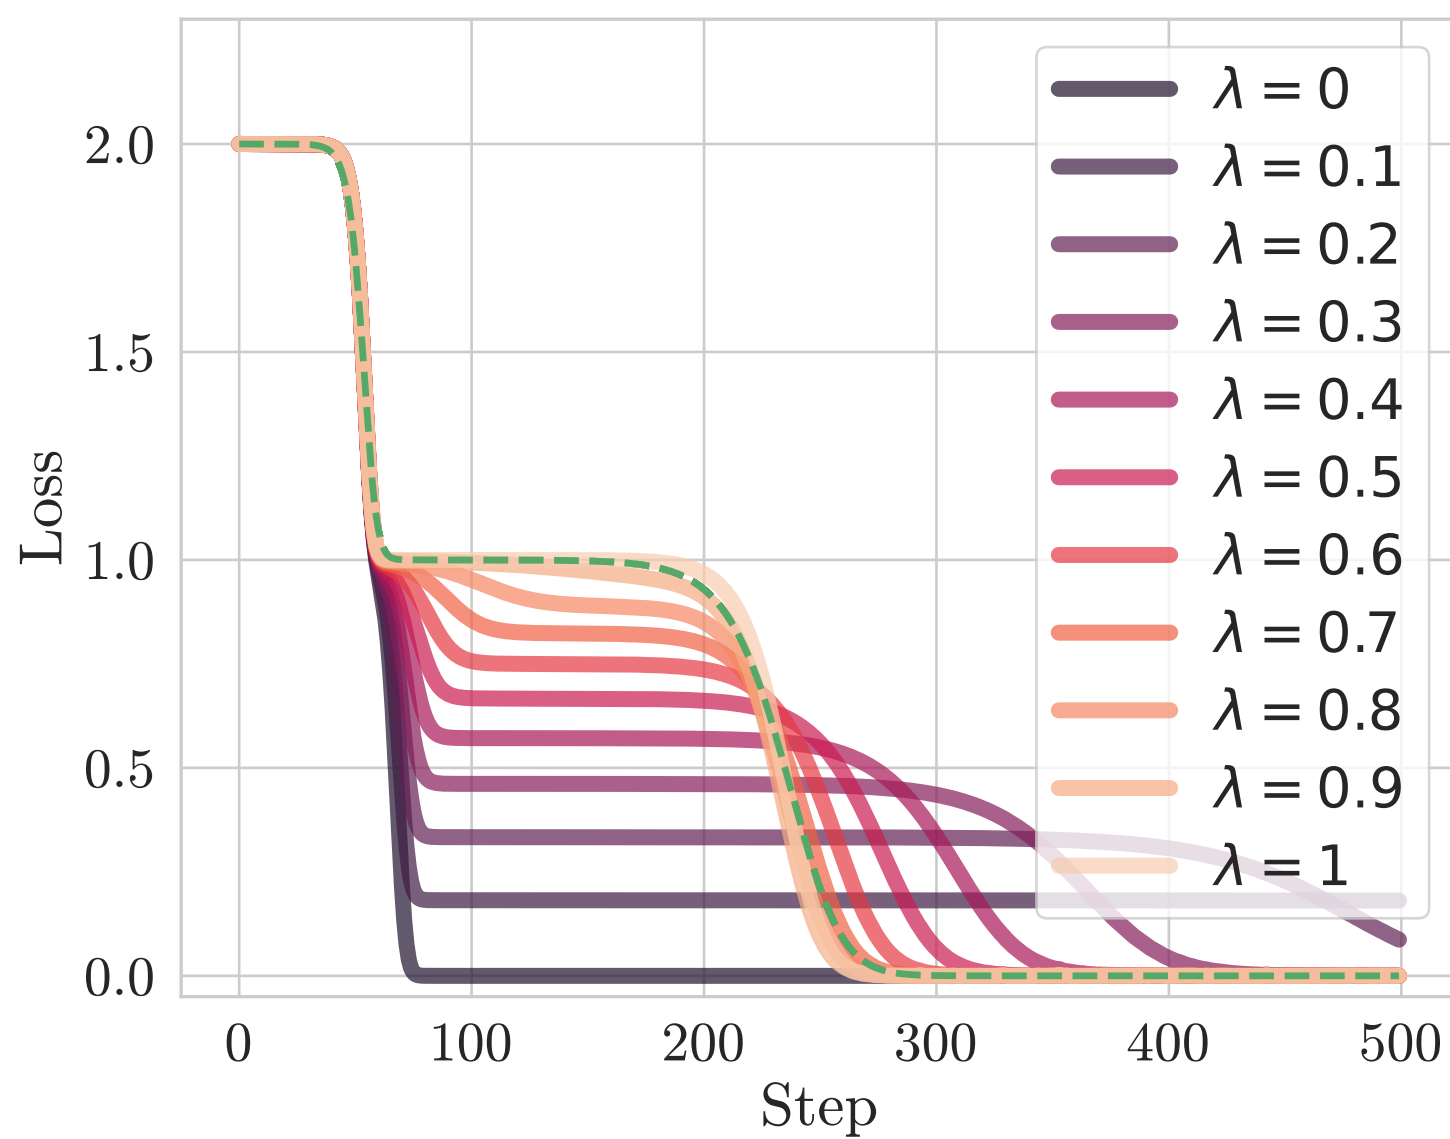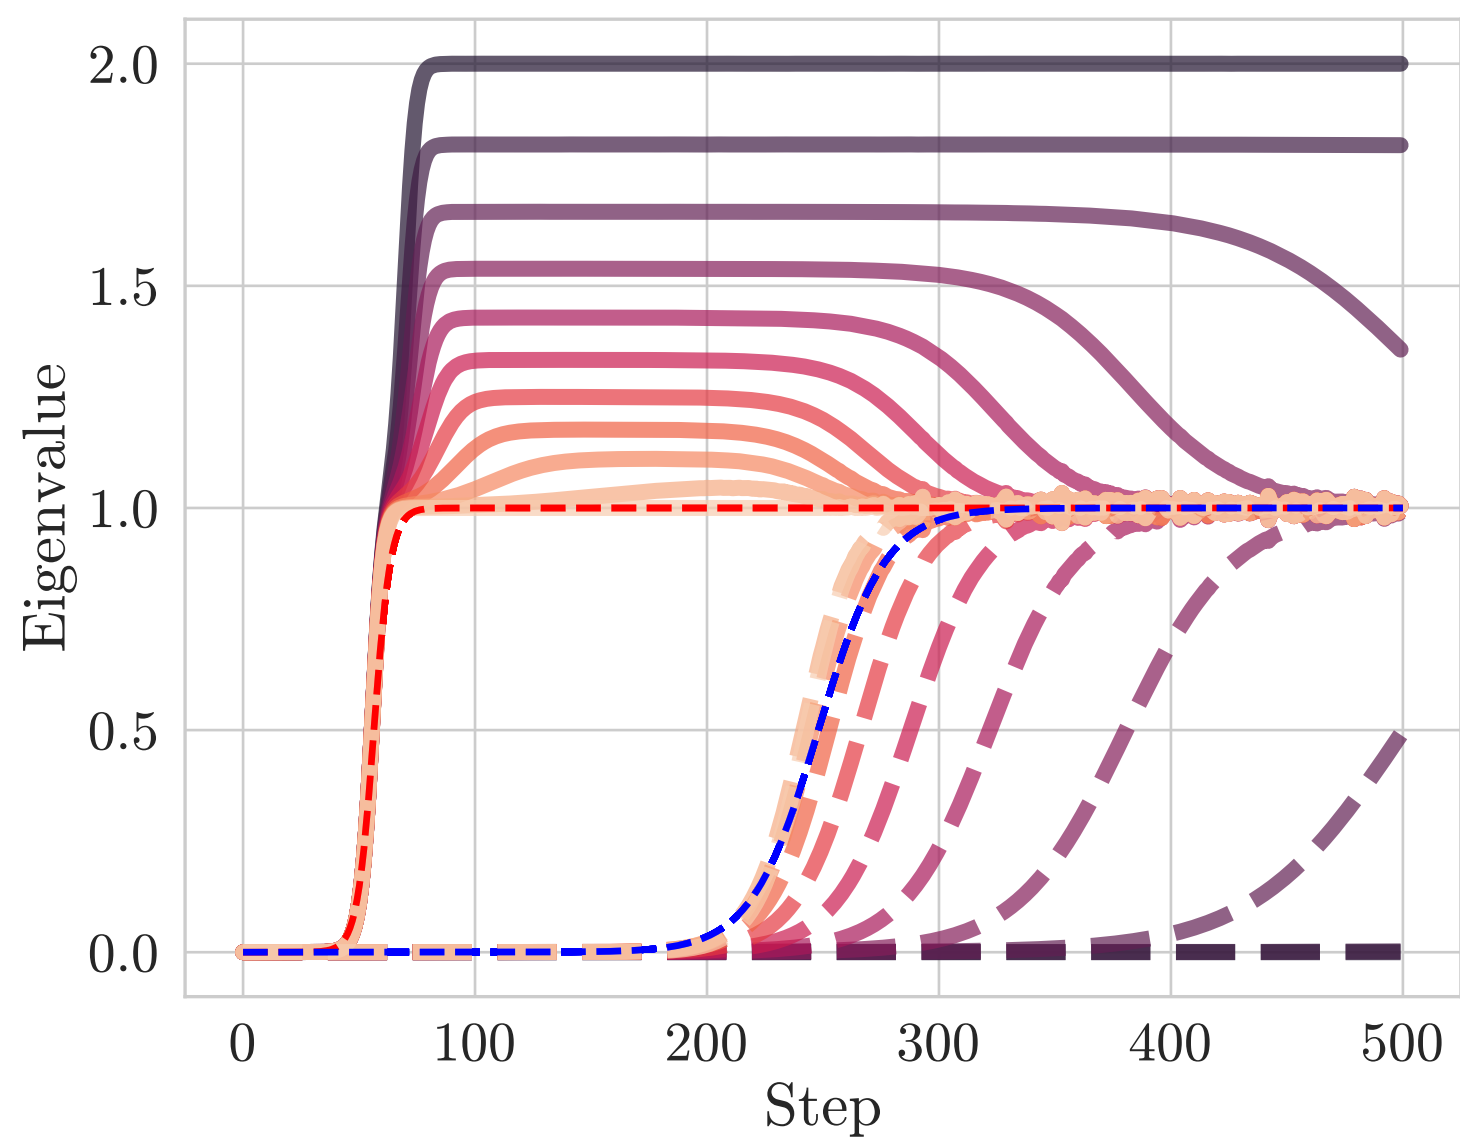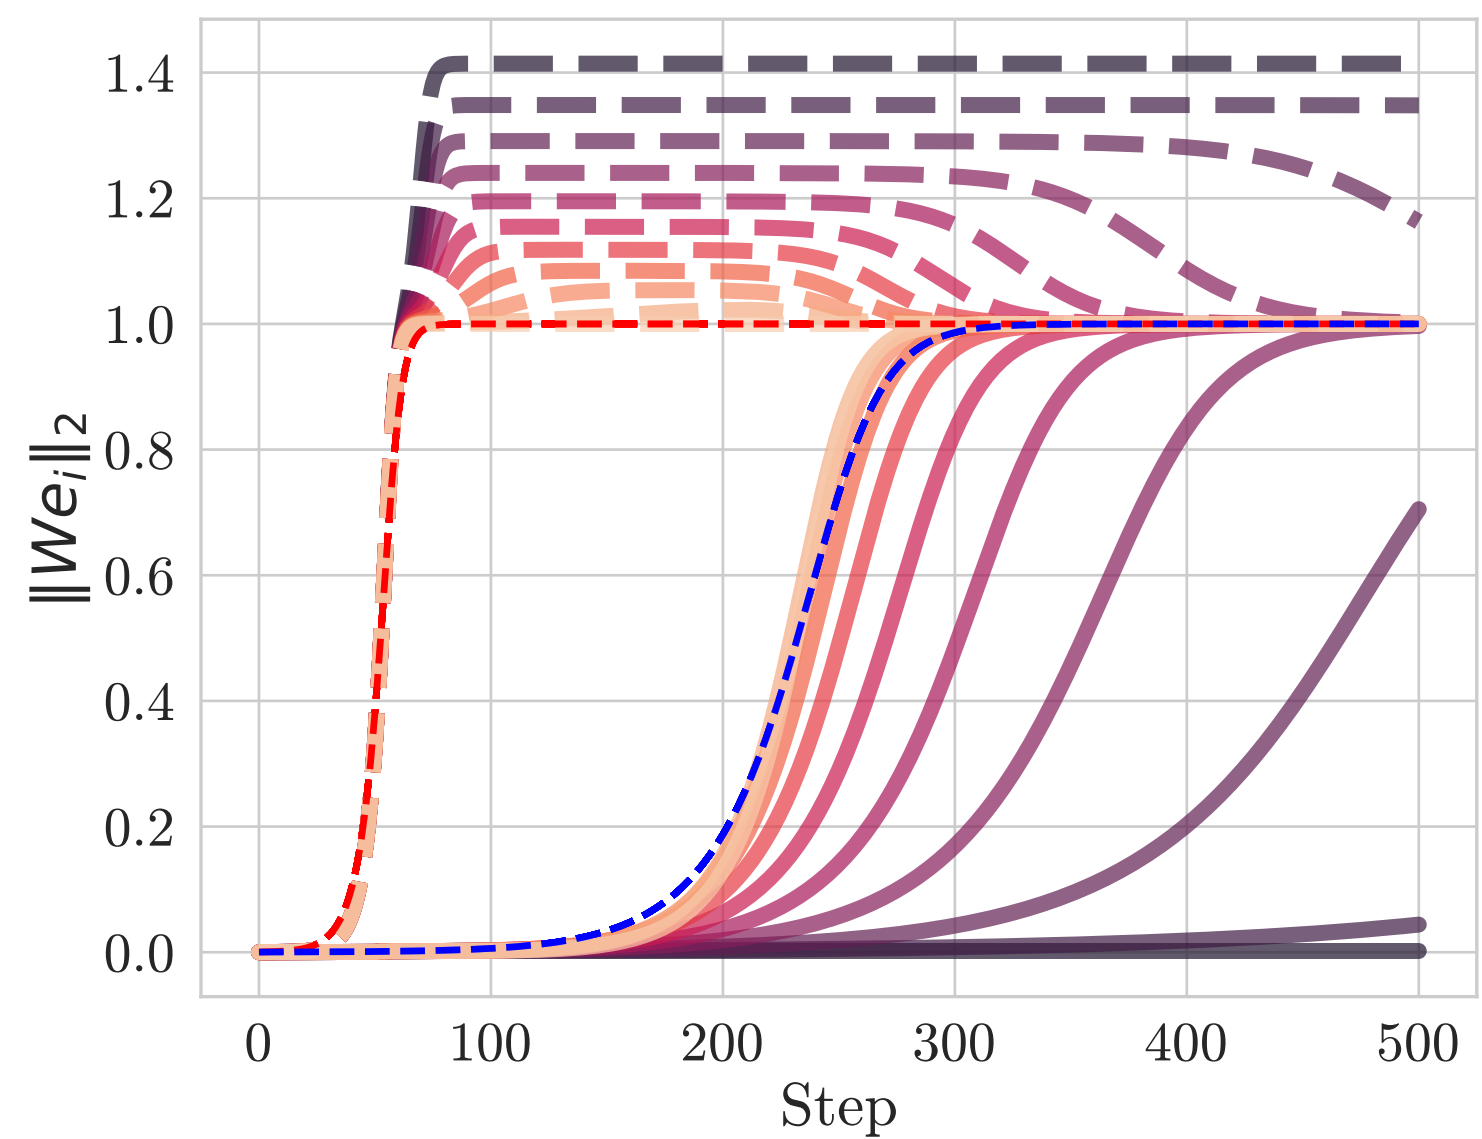

Supplement: supplementary_material [file loss_lambda_all.pdf › iclr2026/iclr/frequency_shortcut/theoretical/linear/figure/loss_lambda_all.pdf]

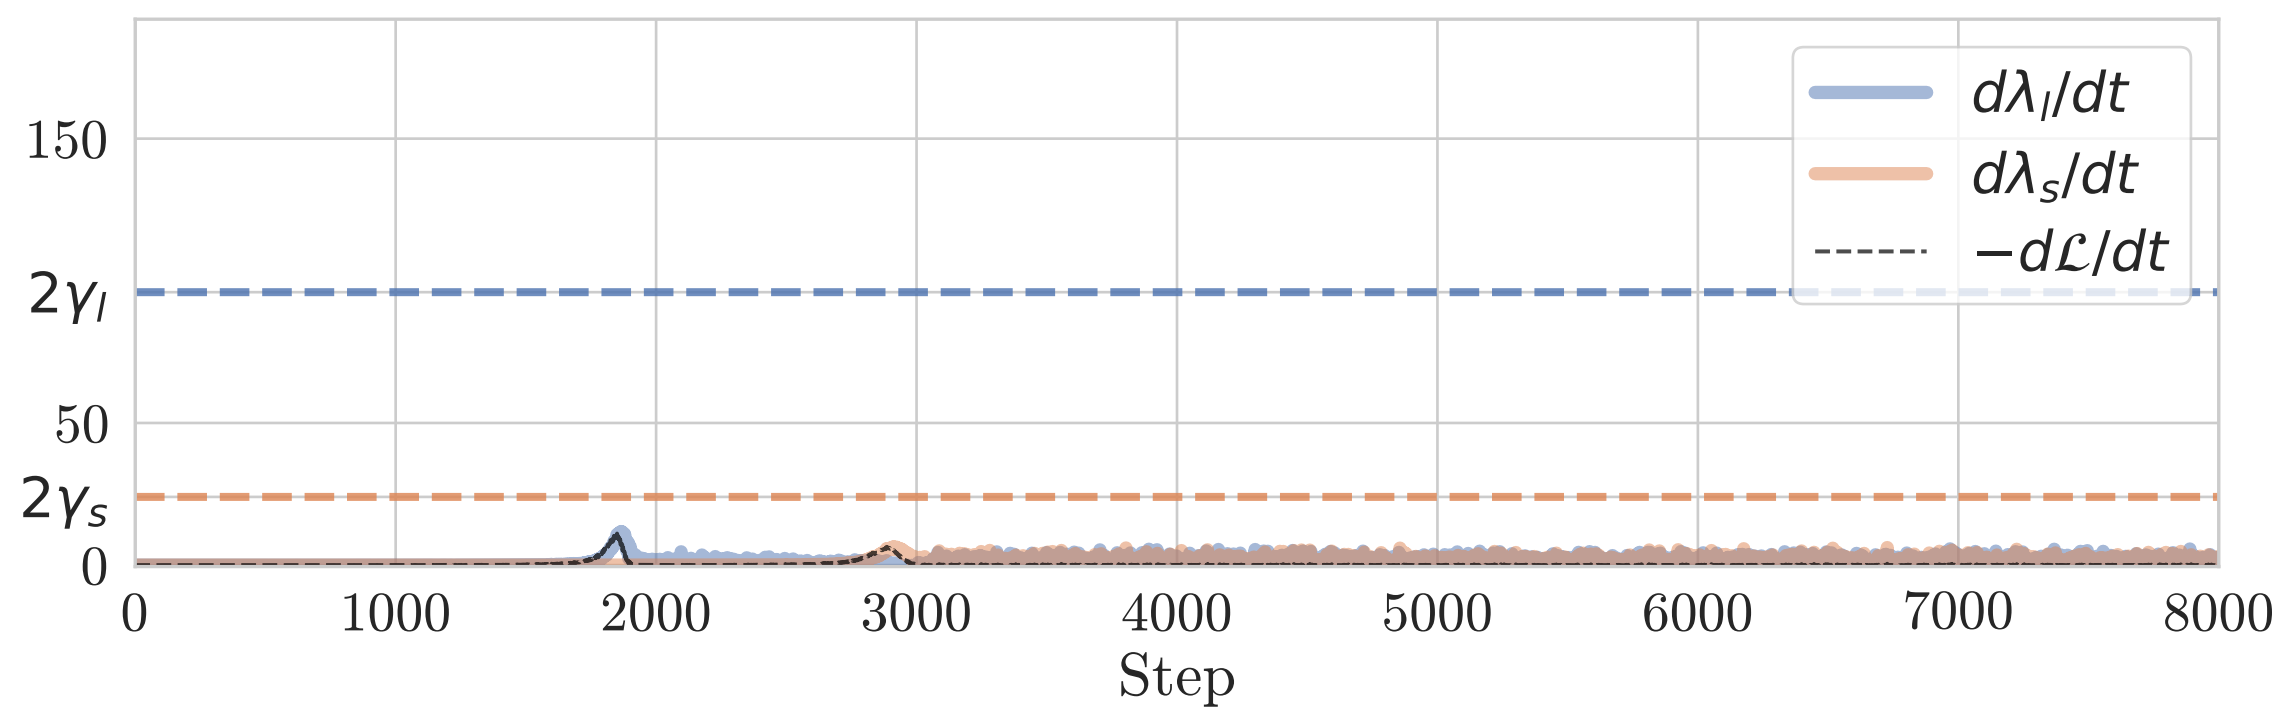

Supplement: supplementary_material [file freq_dcdt_dldt.pdf › iclr2026/iclr/frequency_shortcut/theoretical/mlp/figure/freq_dcdt_dldt.pdf]

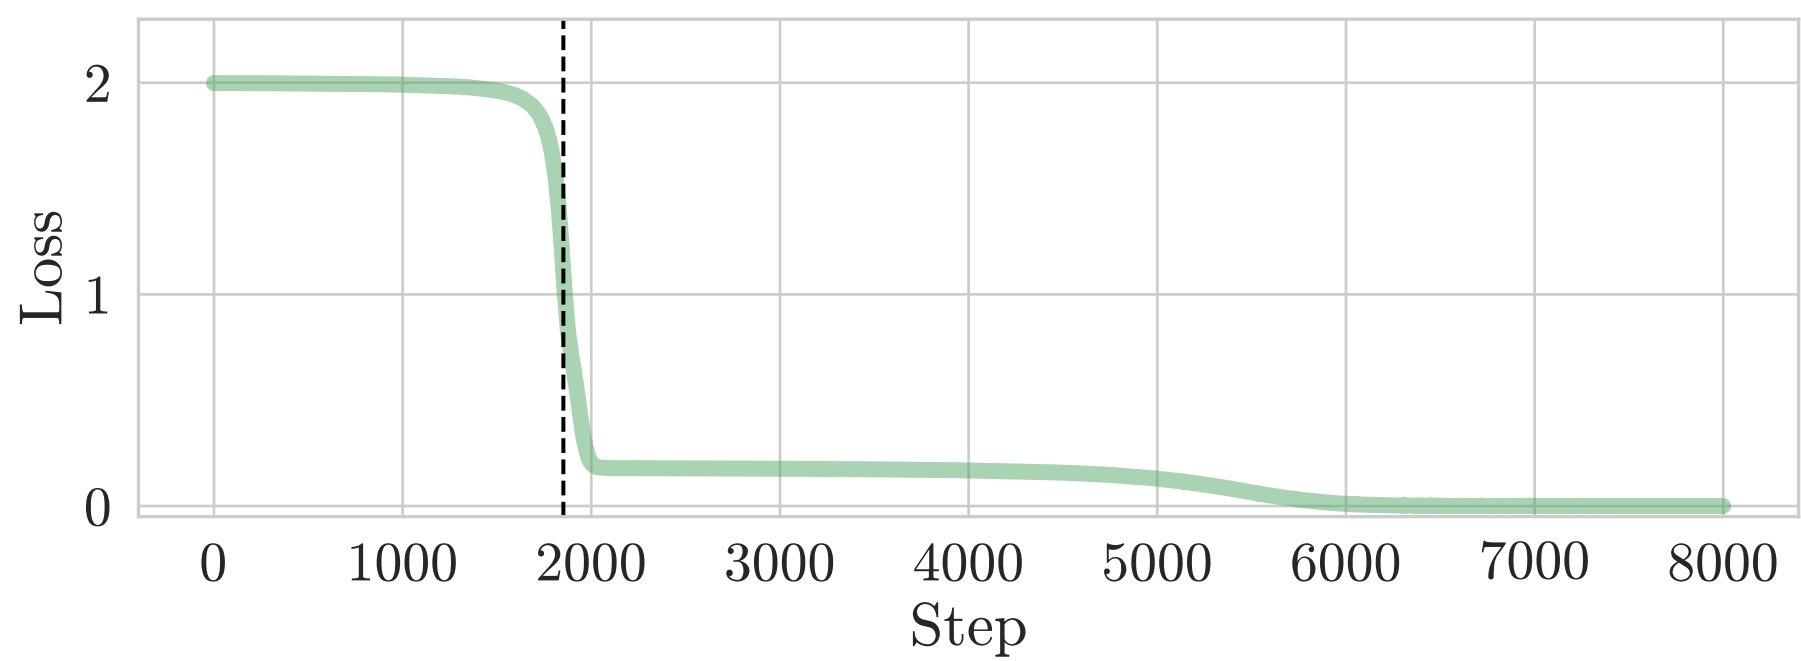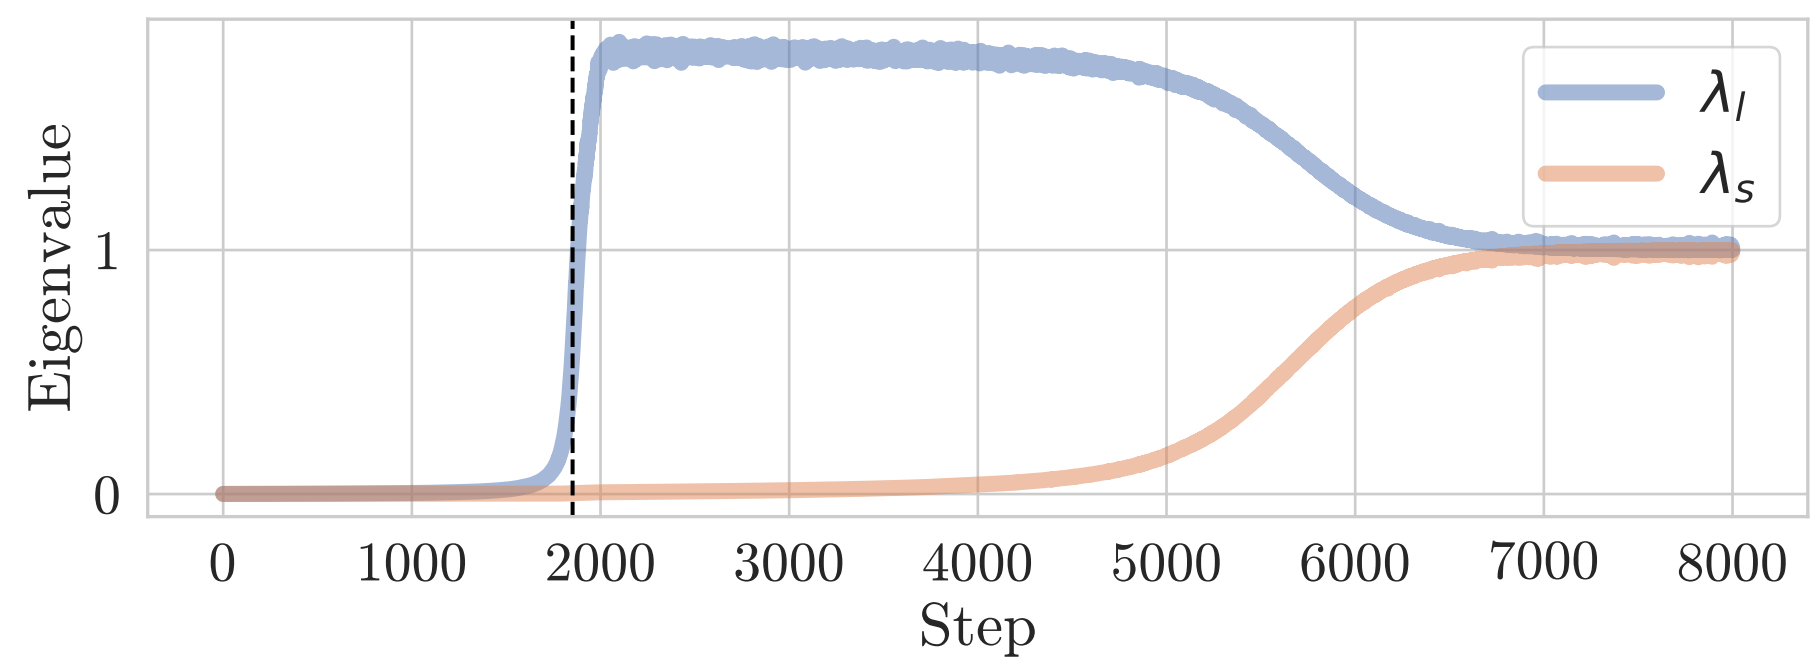

Supplement: supplementary_material [file freq_loss_eig_align_BarlowTwins_0.1.pdf › iclr2026/iclr/frequency_shortcut/theoretical/mlp/figure/freq_loss_eig_align_BarlowTwins_0.1.pdf]

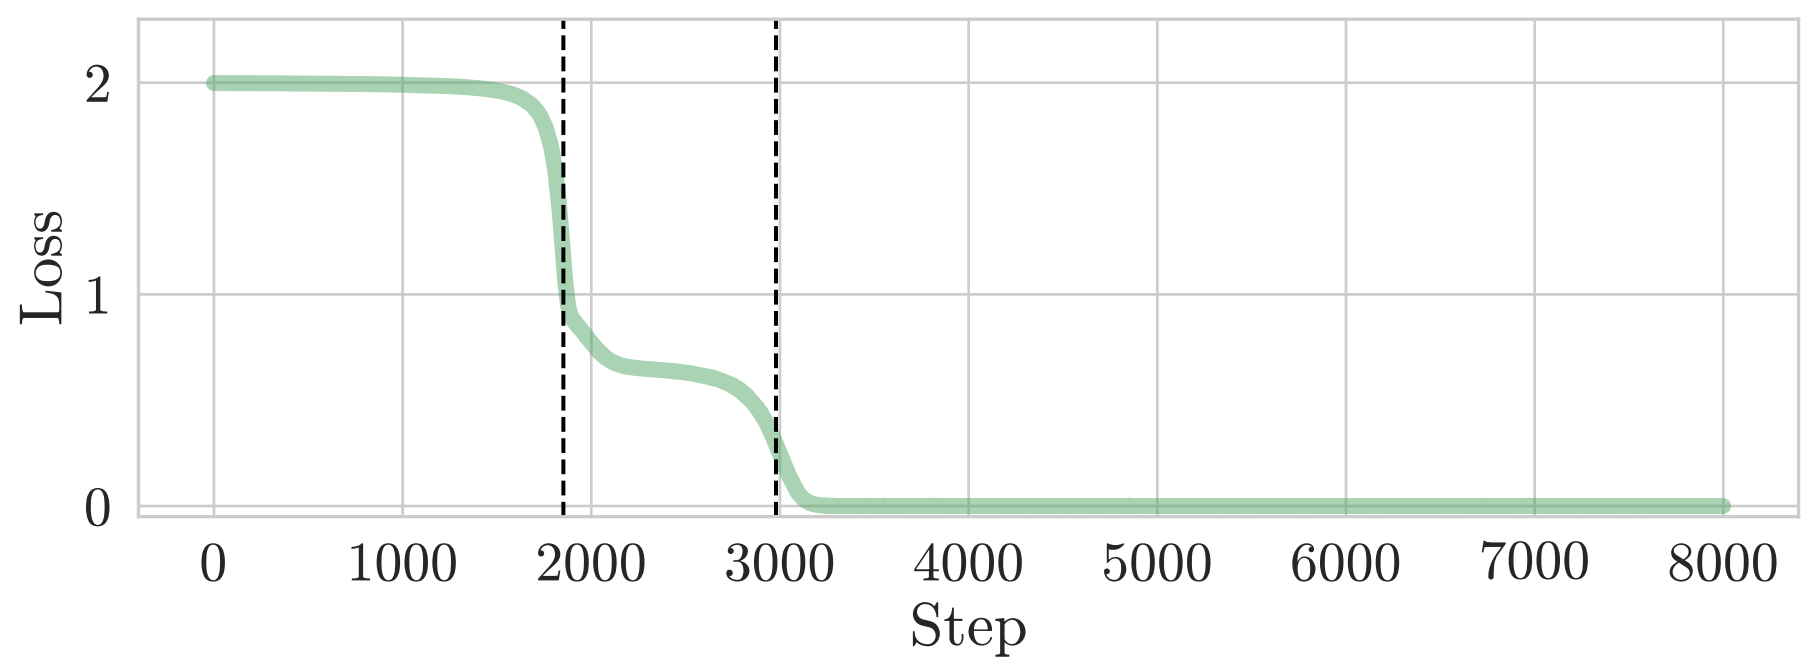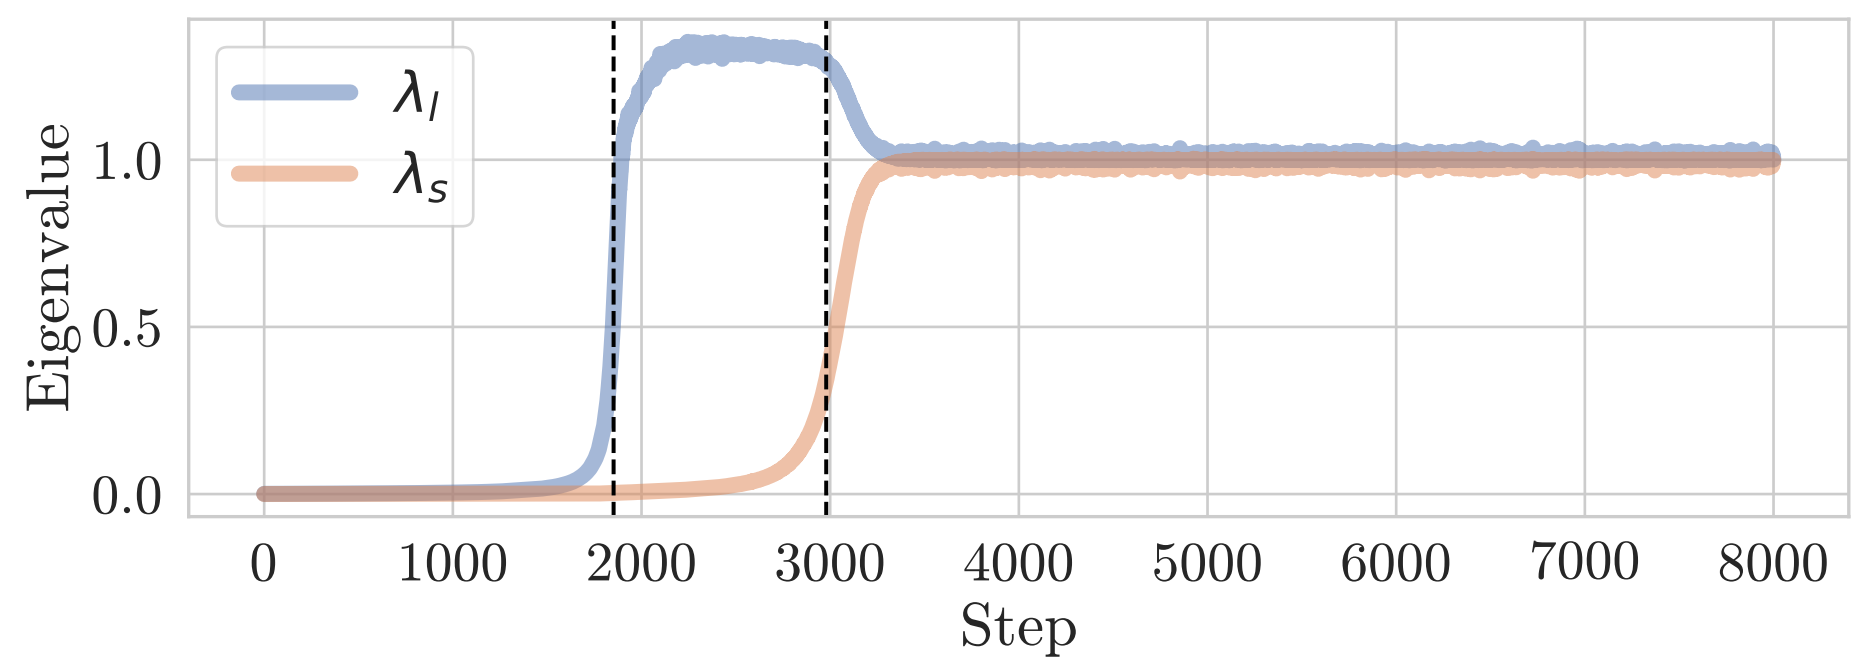

Supplement: supplementary_material [file freq_loss_eig_align_BarlowTwins_0.5.pdf › iclr2026/iclr/frequency_shortcut/theoretical/mlp/figure/freq_loss_eig_align_BarlowTwins_0.5.pdf]

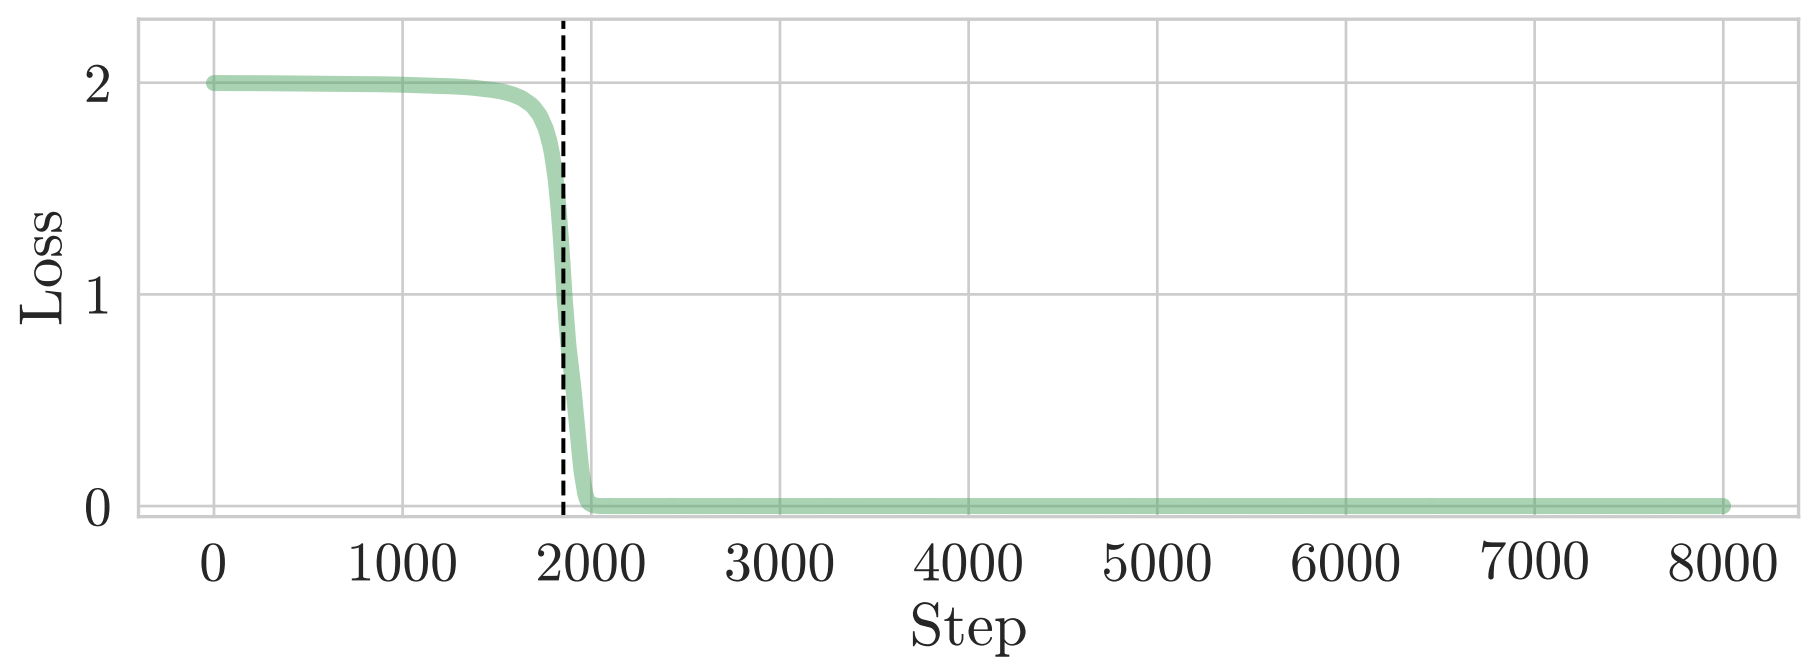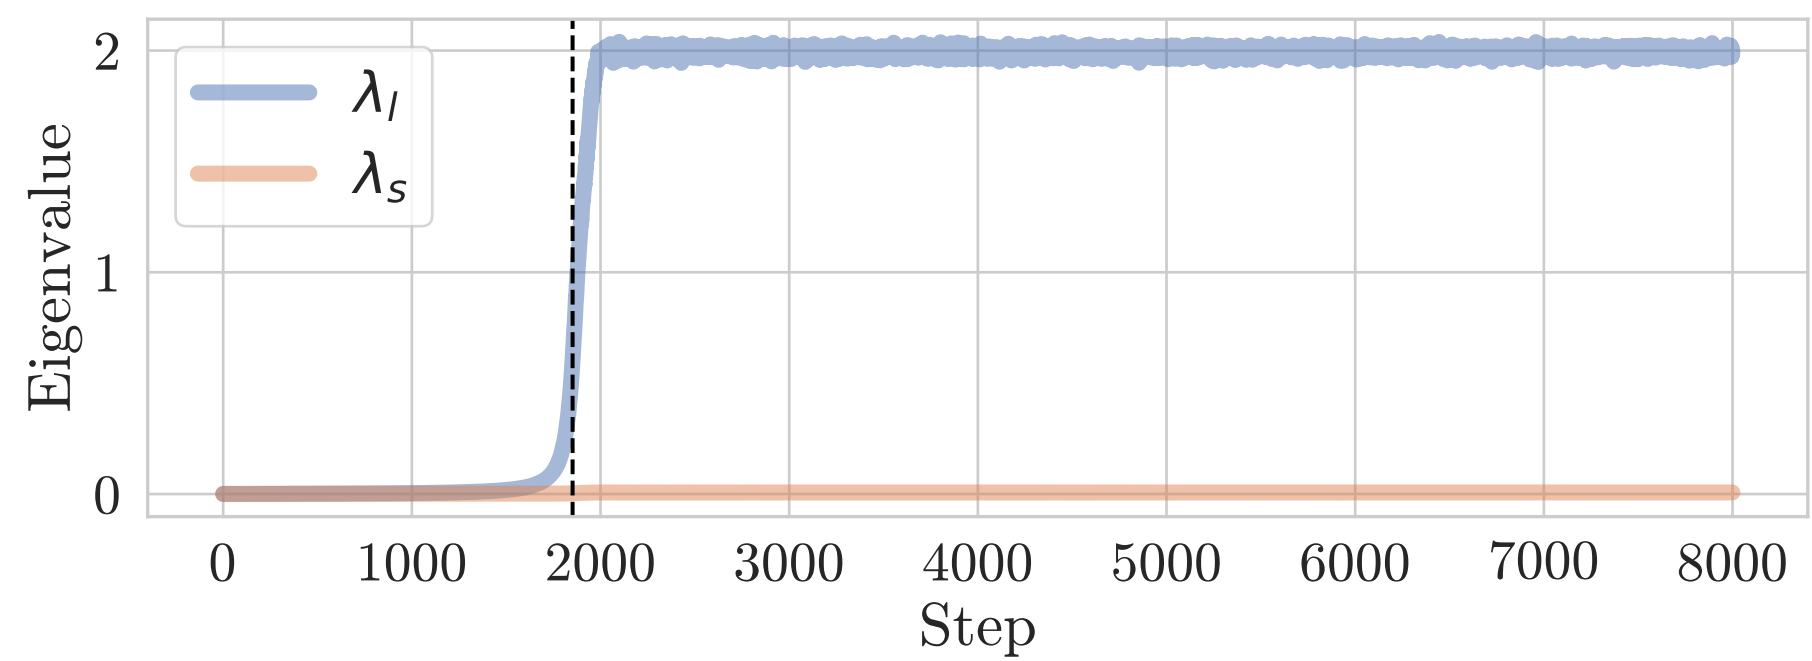

Supplement: supplementary_material [file freq_loss_eig_align_BarlowTwins_0.pdf › iclr2026/iclr/frequency_shortcut/theoretical/mlp/figure/freq_loss_eig_align_BarlowTwins_0.pdf]

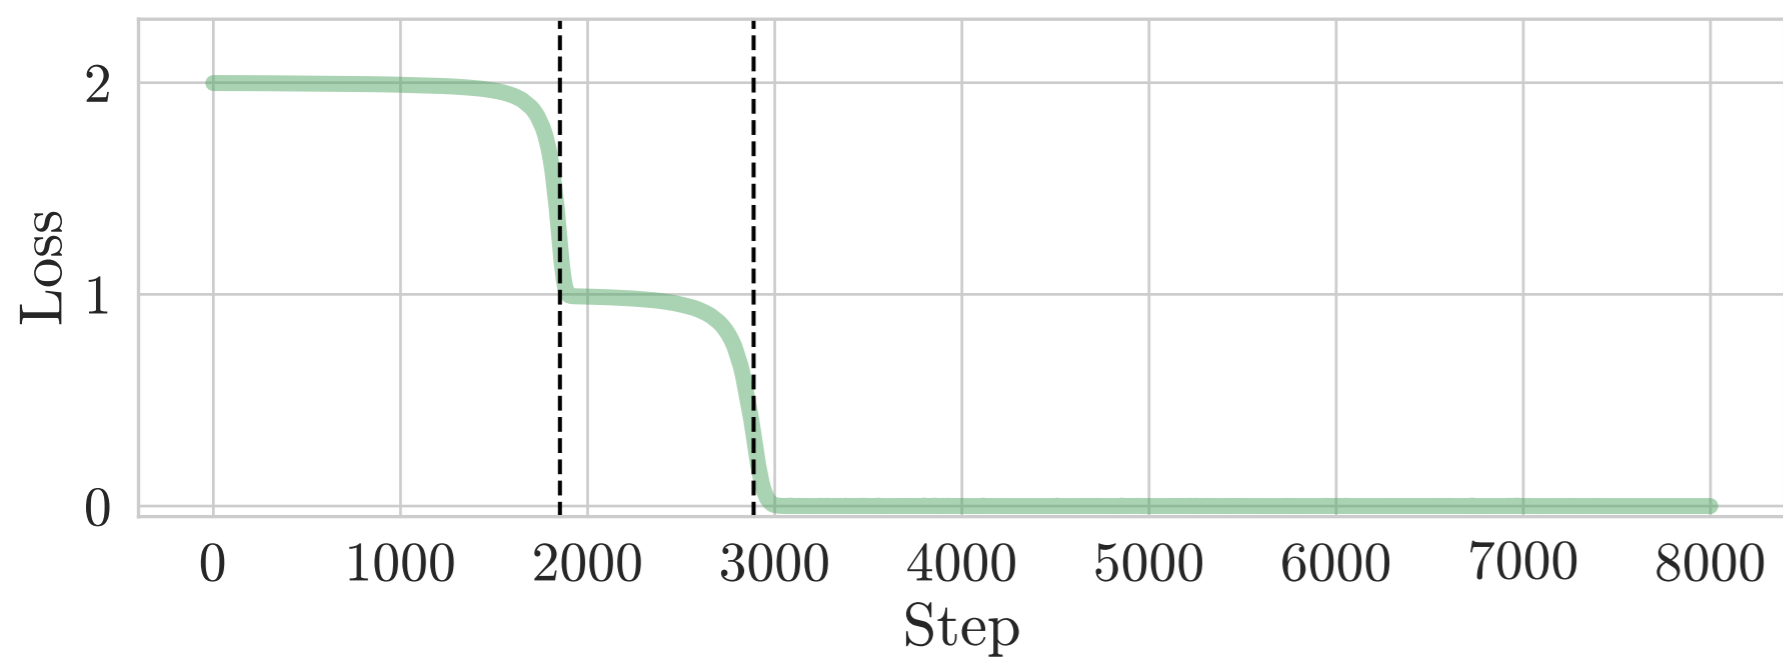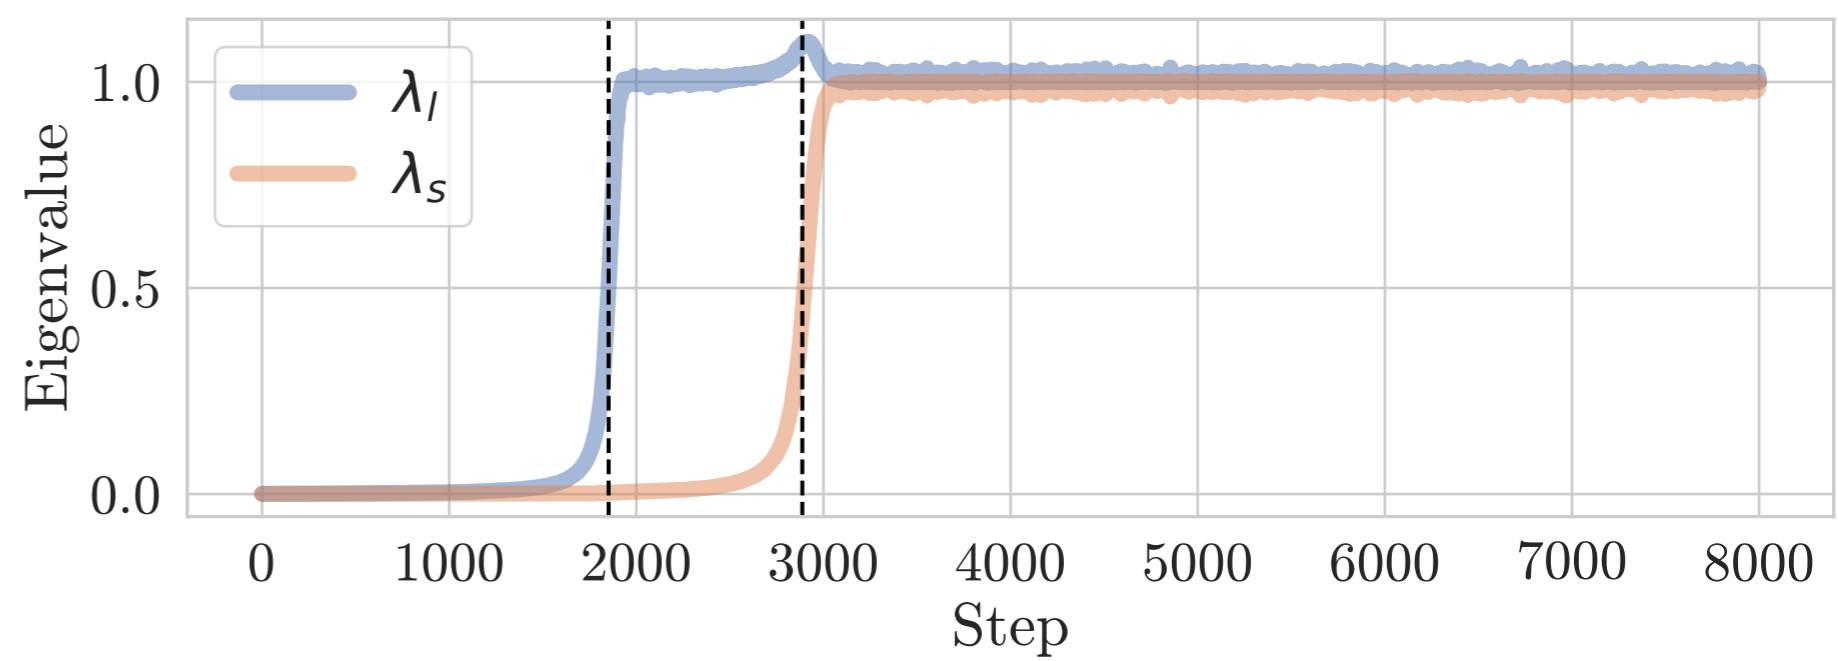

Supplement: supplementary_material [file freq_loss_eig_align_BarlowTwins_1.pdf › iclr2026/iclr/frequency_shortcut/theoretical/mlp/figure/freq_loss_eig_align_BarlowTwins_1.pdf]

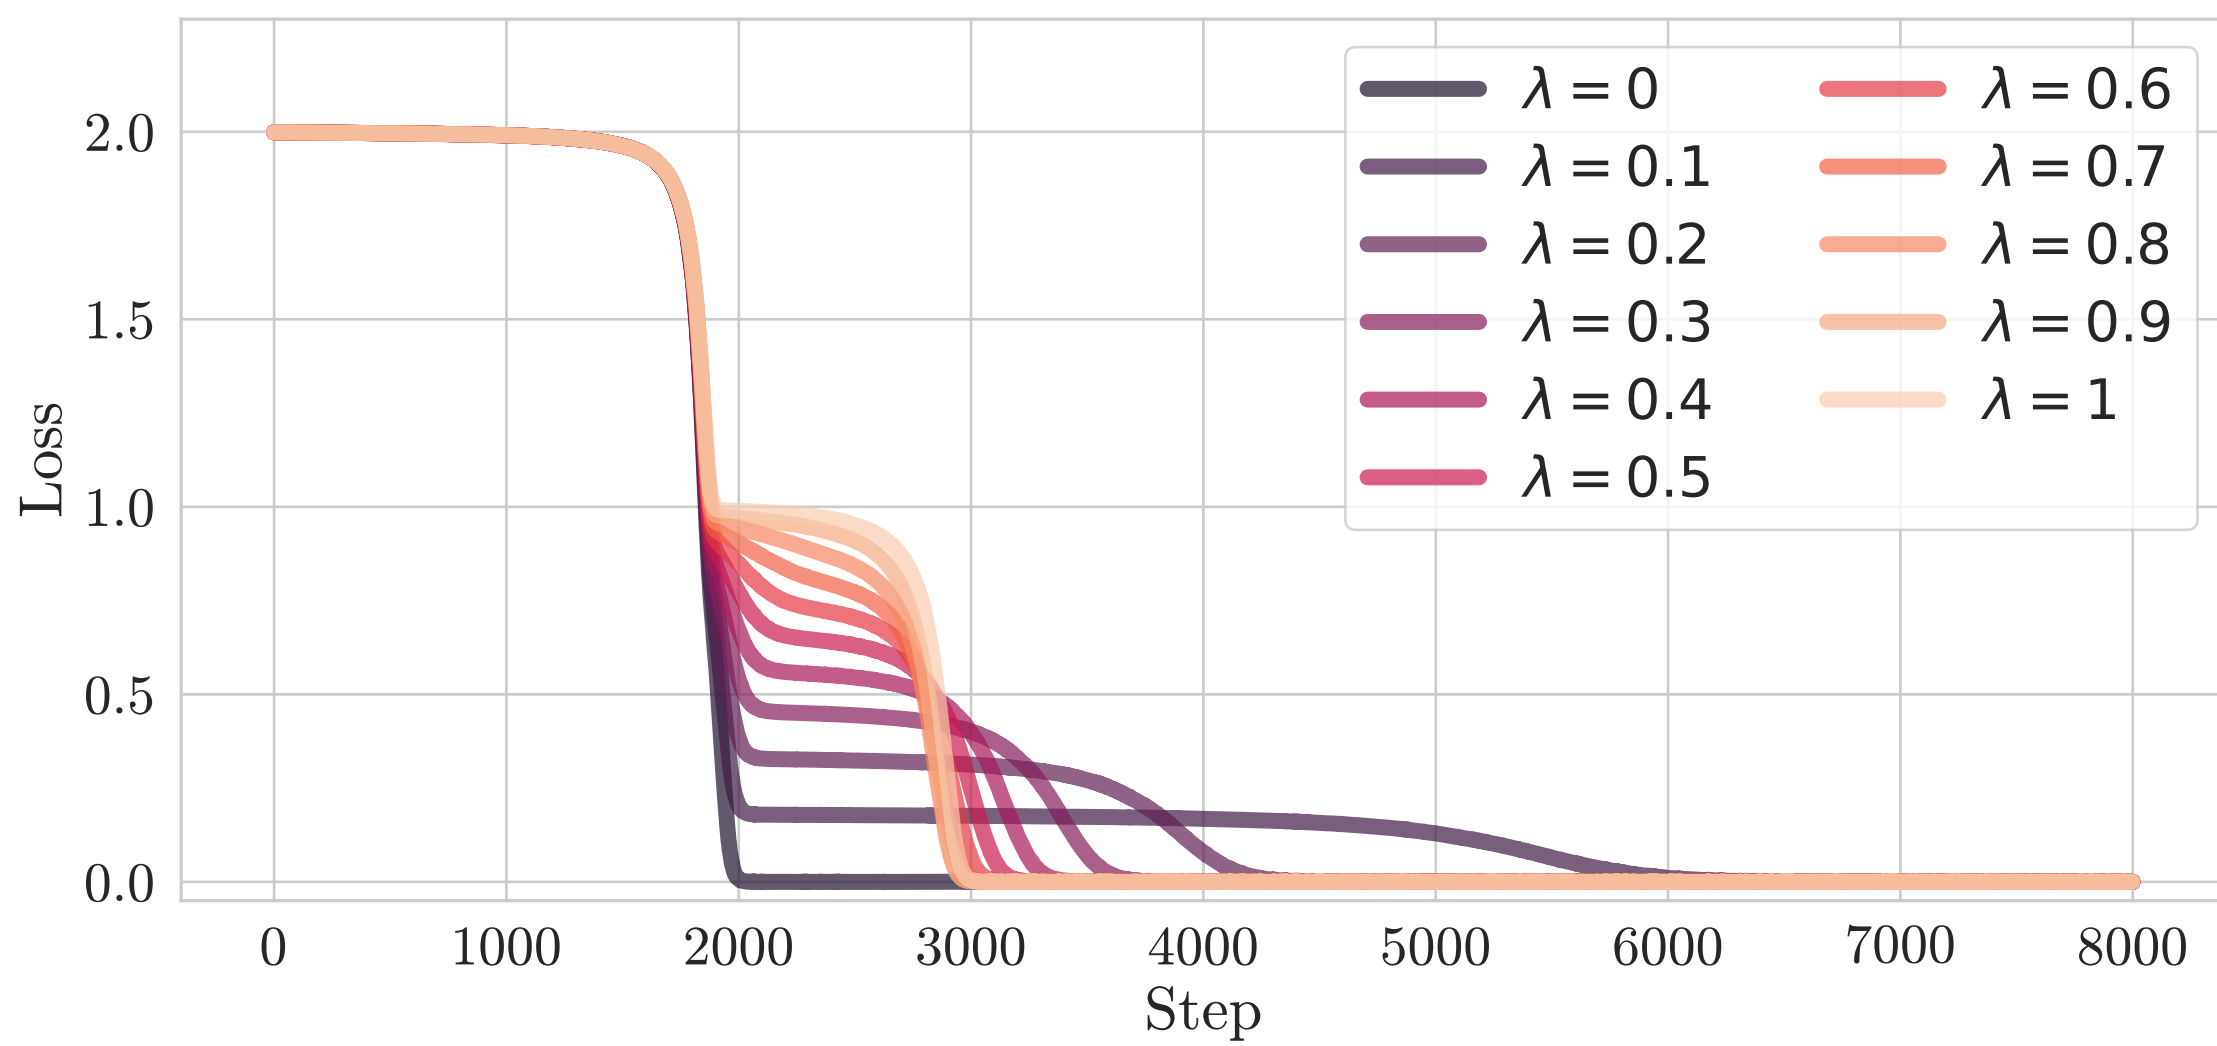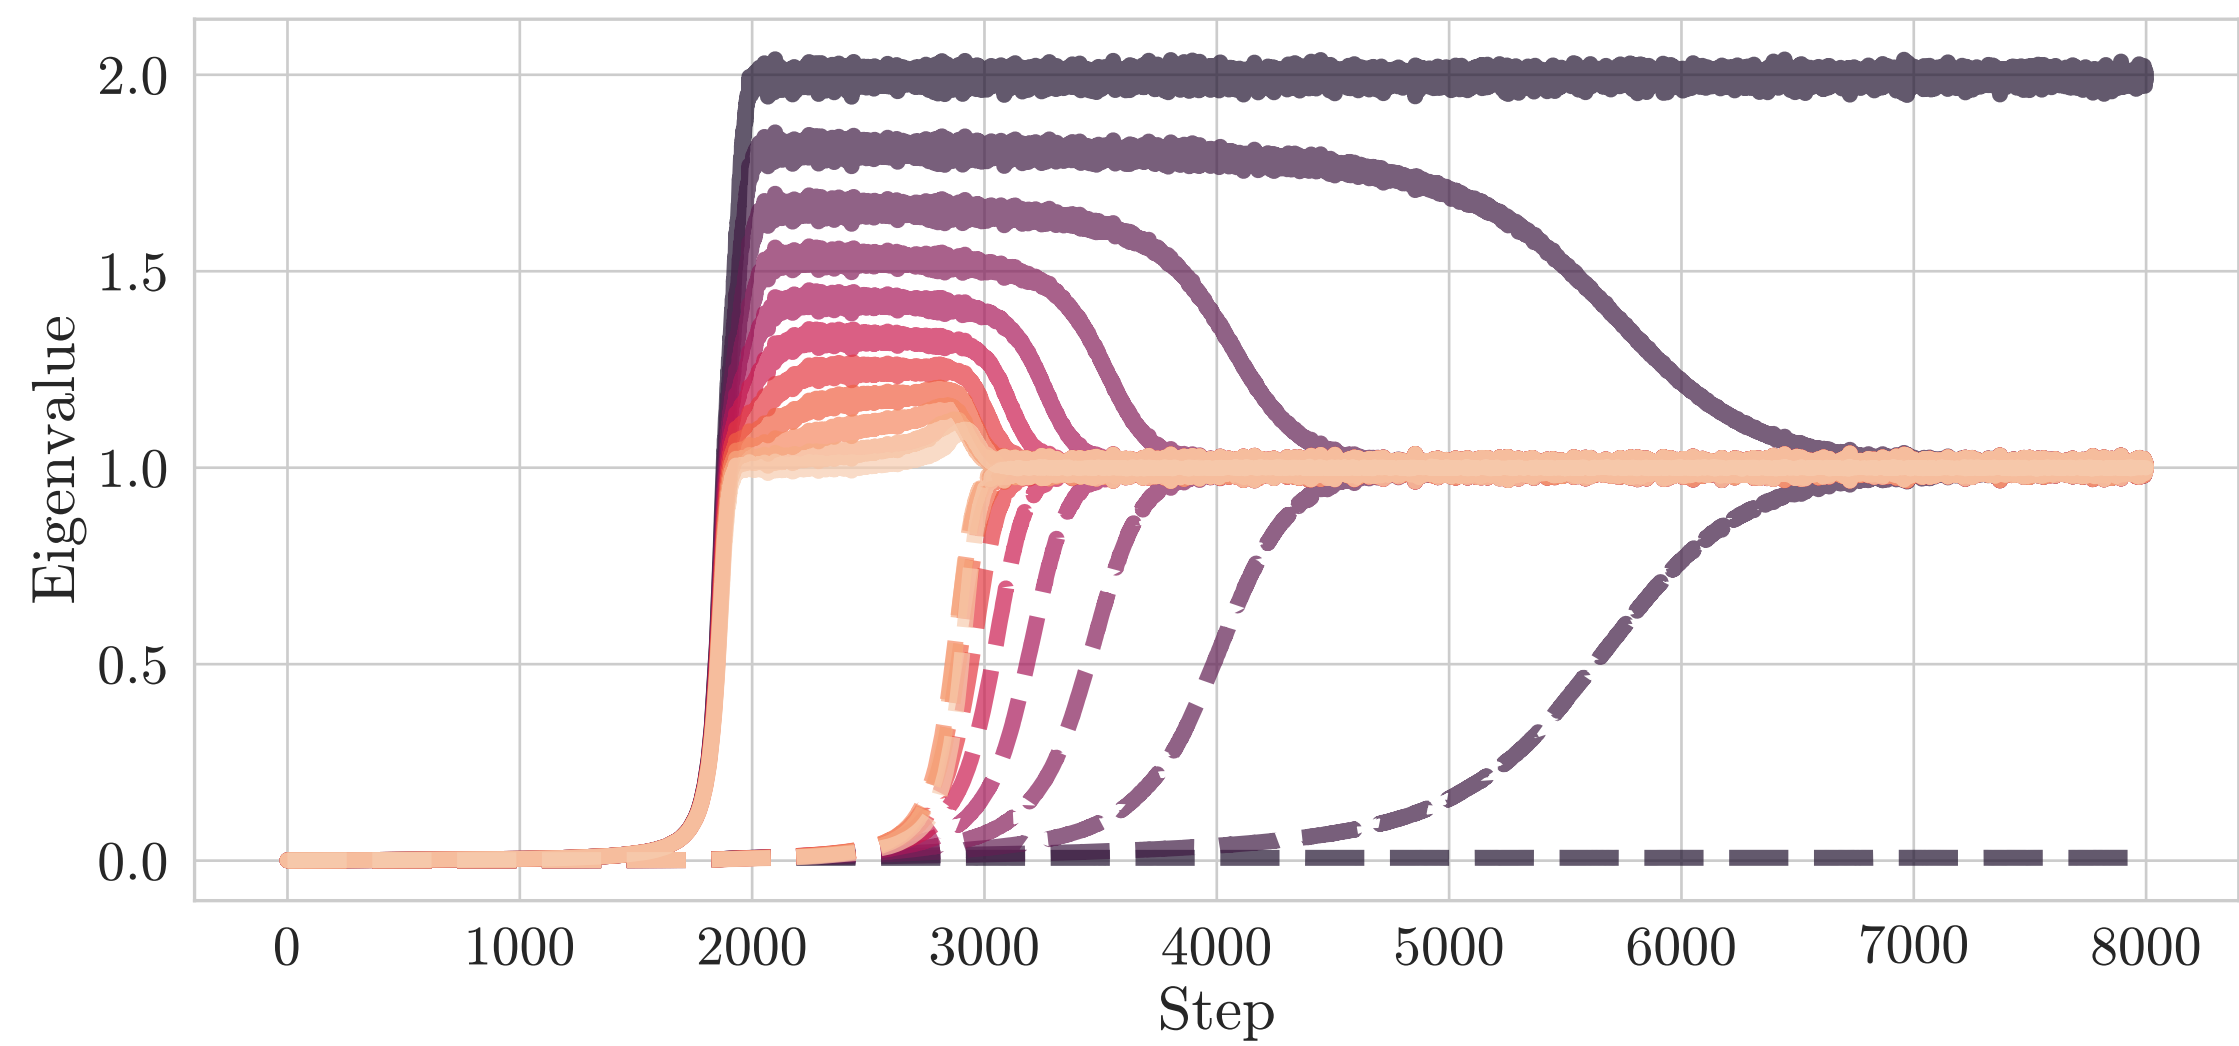

Supplement: supplementary_material [file loss_lambda_all.pdf › iclr2026/iclr/frequency_shortcut/theoretical/mlp/figure/loss_lambda_all.pdf]

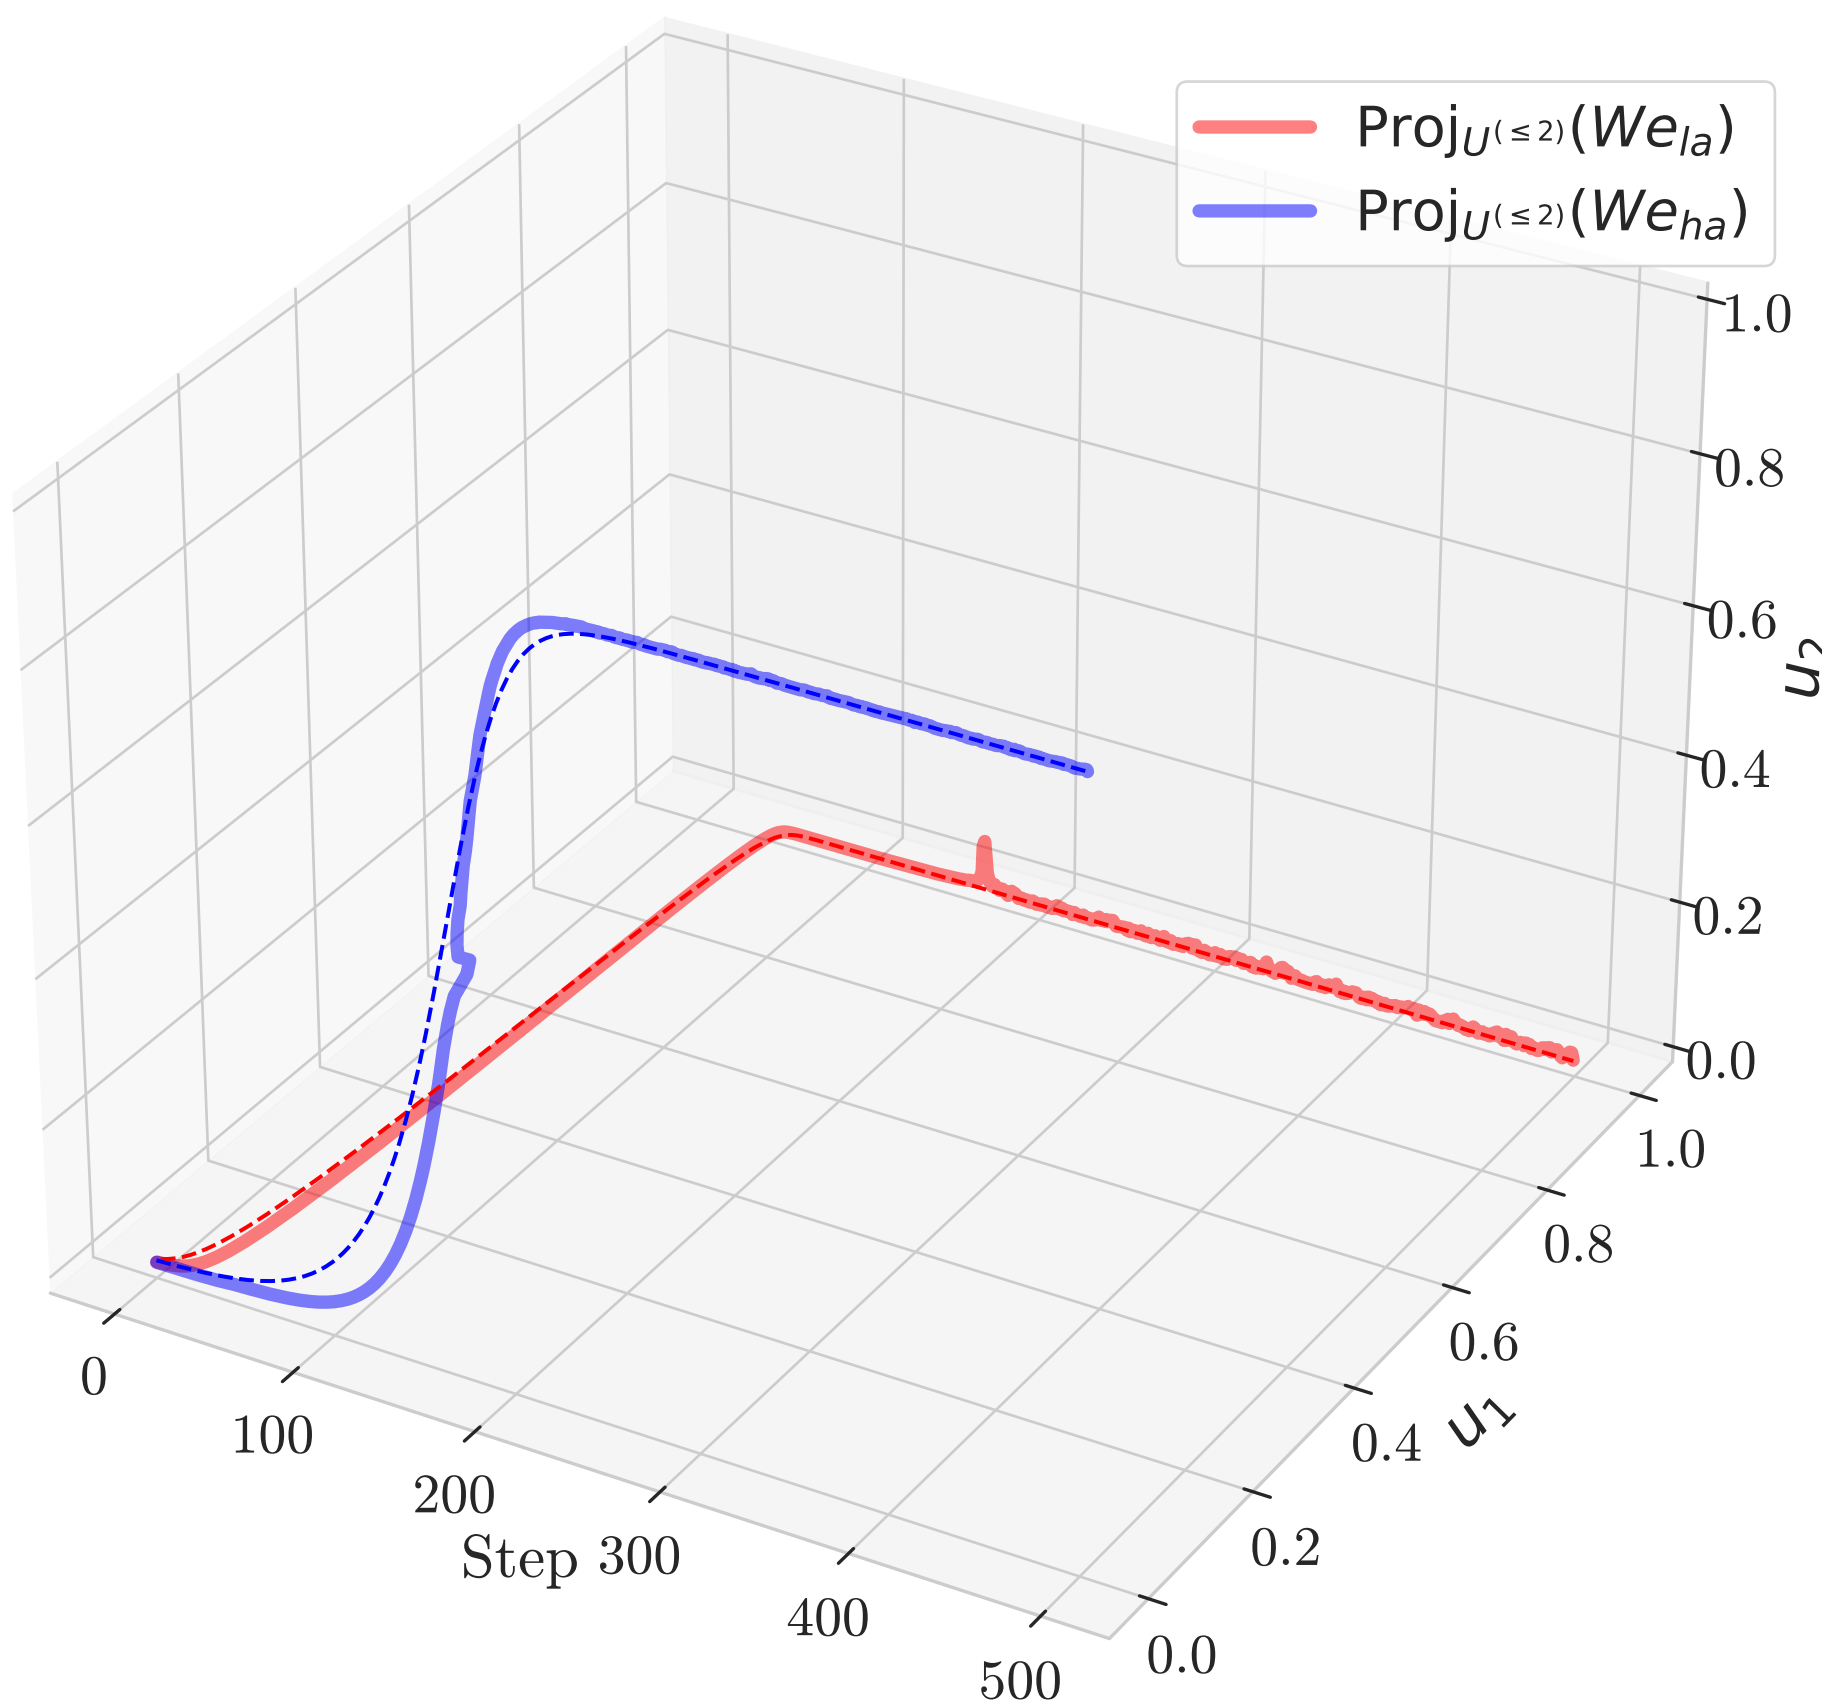

Supplement: supplementary_material [file freq_3d.pdf › iclr2026/iclr/frequency_shortcut/theoretical/old/figure/freq_3d.pdf]

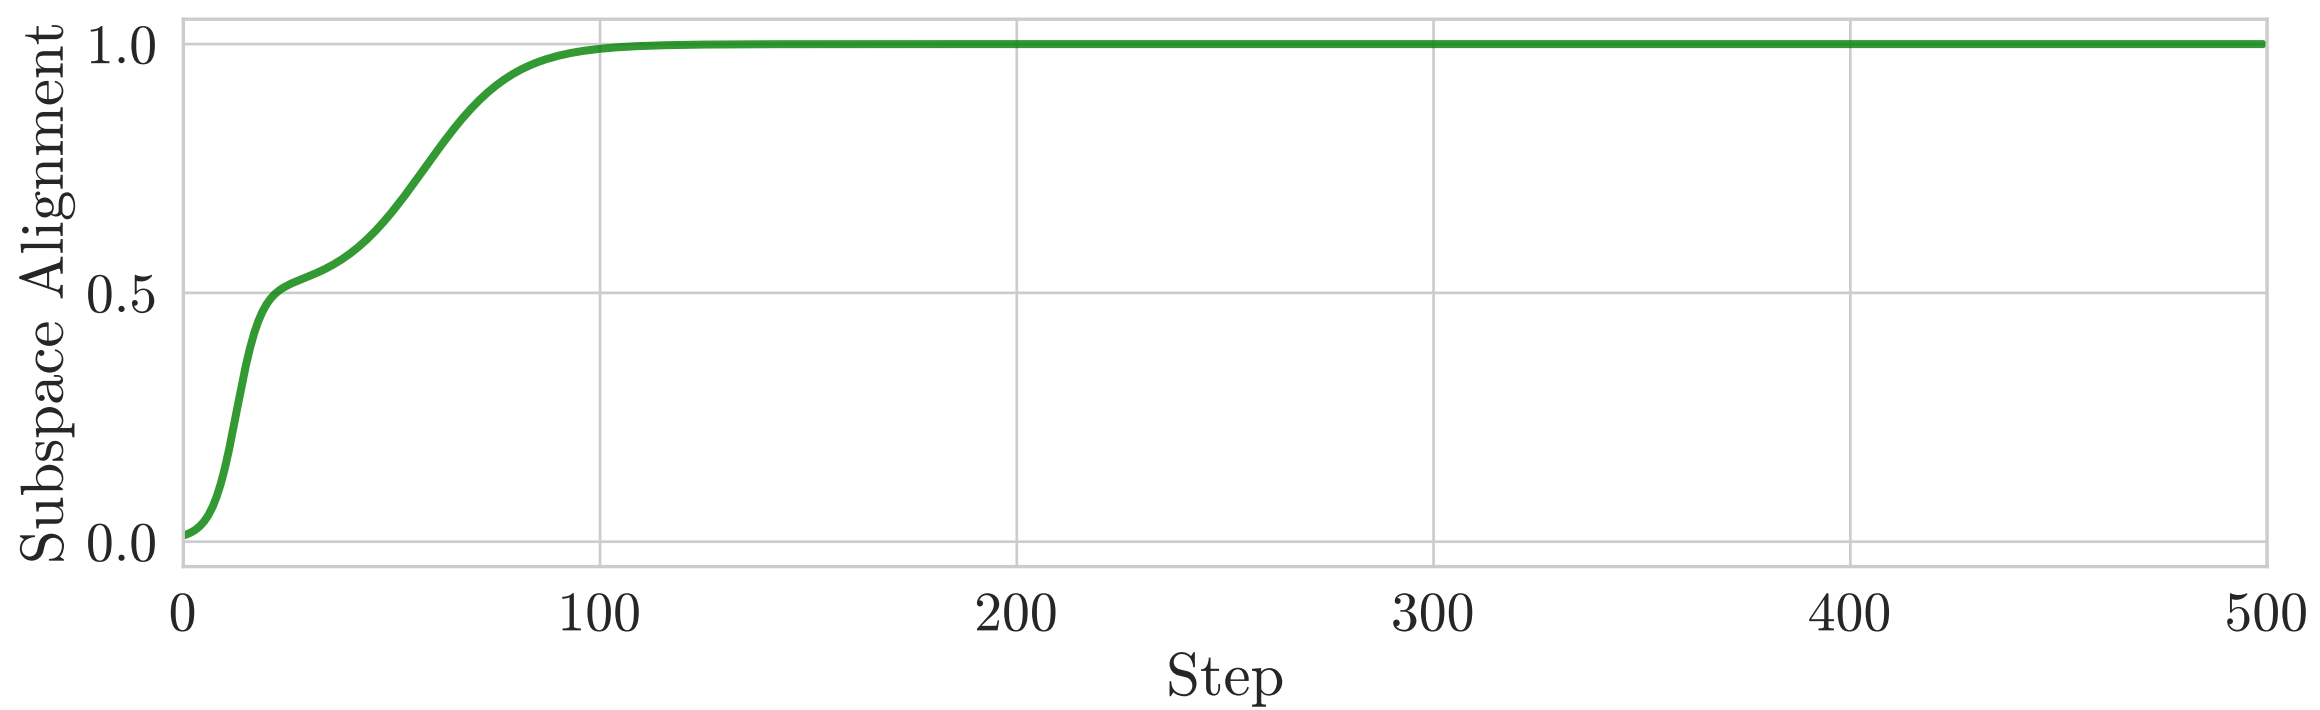

Supplement: supplementary_material [file freq_alignment.pdf › iclr2026/iclr/frequency_shortcut/theoretical/old/figure/freq_alignment.pdf]

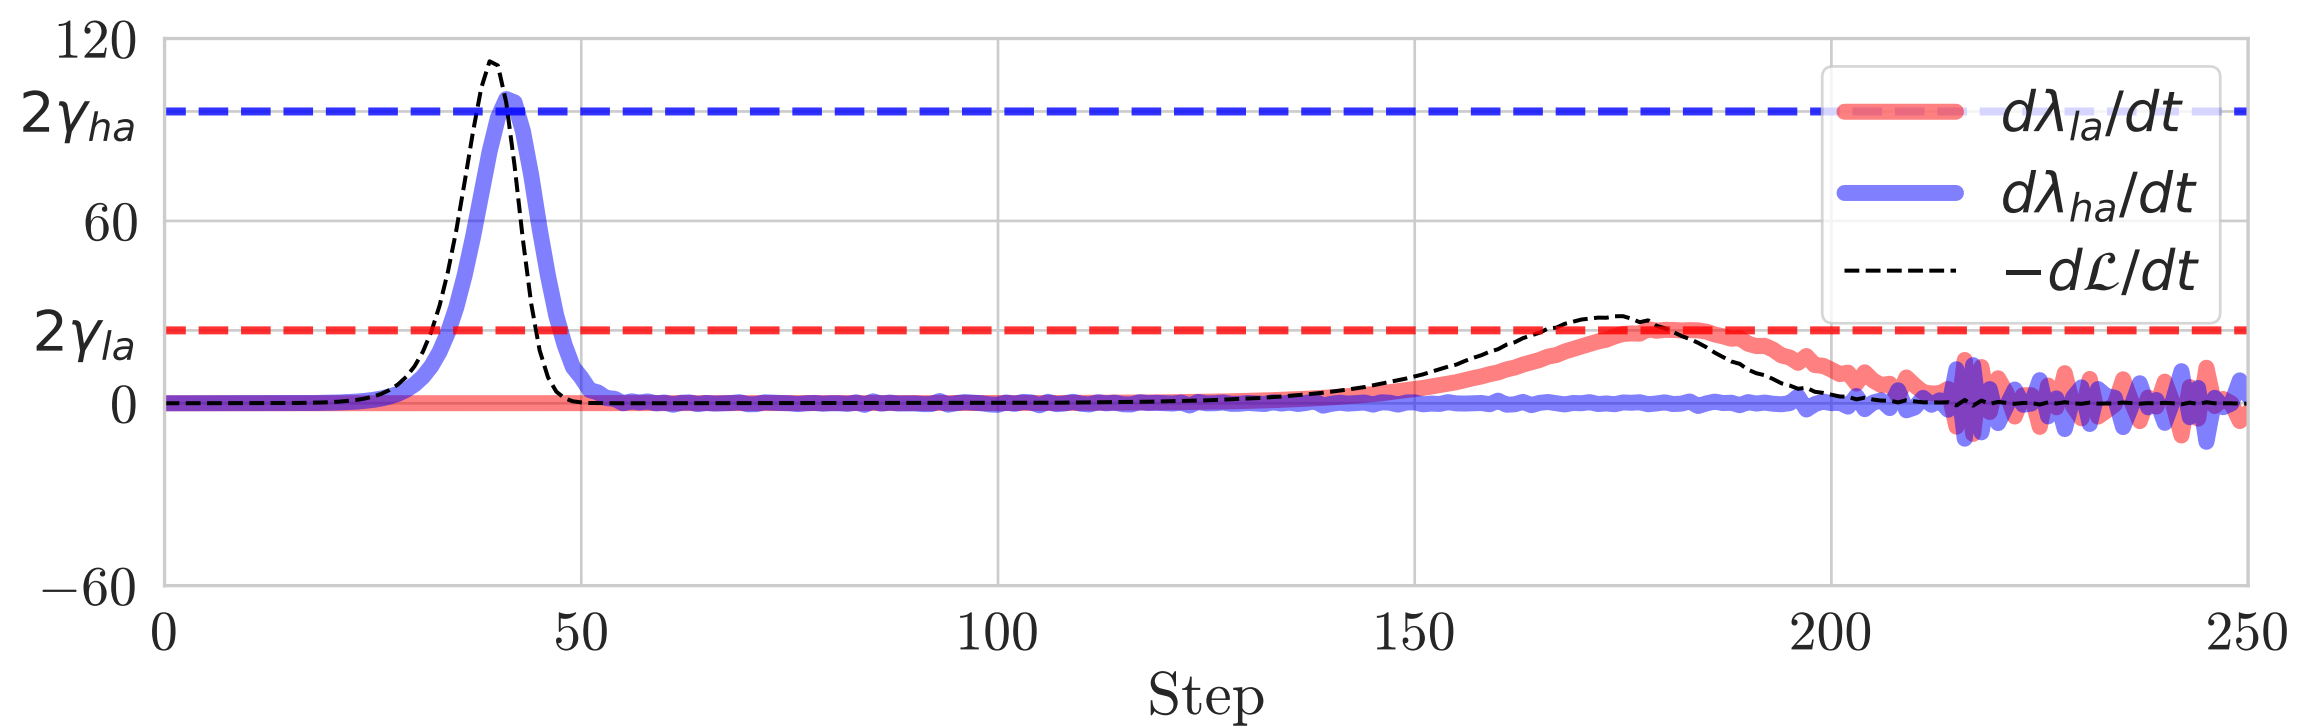

Supplement: supplementary_material [file freq_dcdt_dldt.pdf › iclr2026/iclr/frequency_shortcut/theoretical/old/figure/freq_dcdt_dldt.pdf]

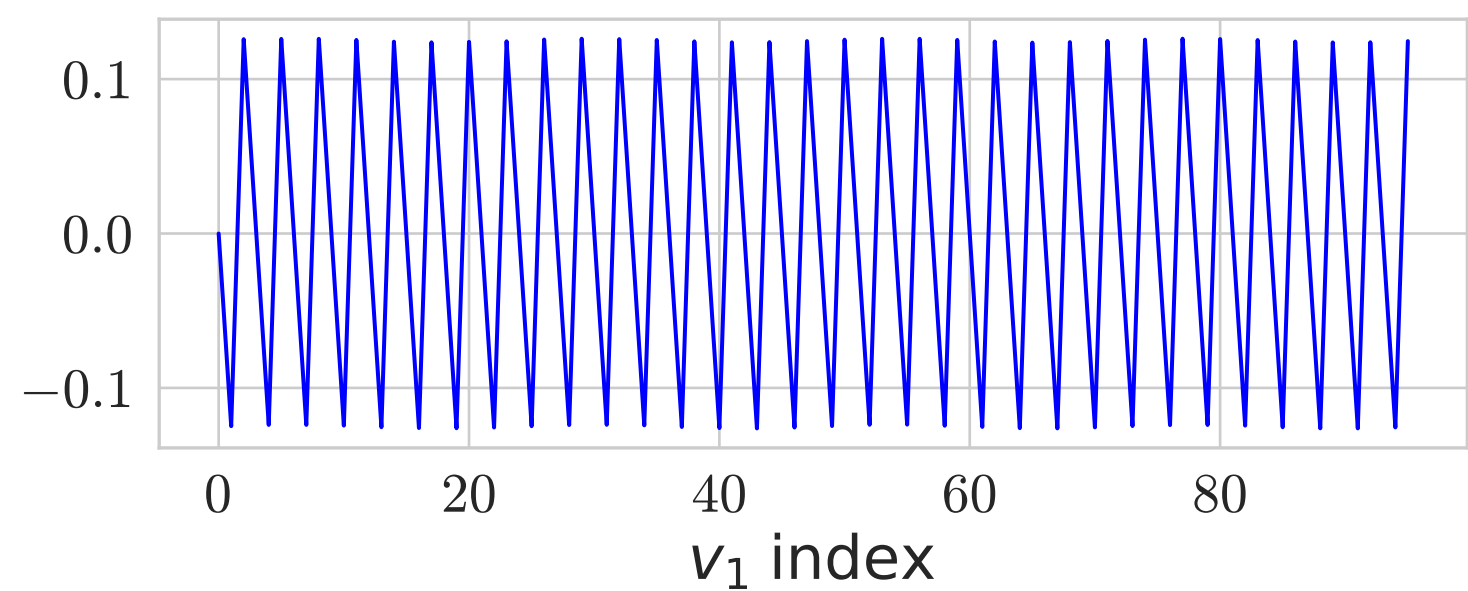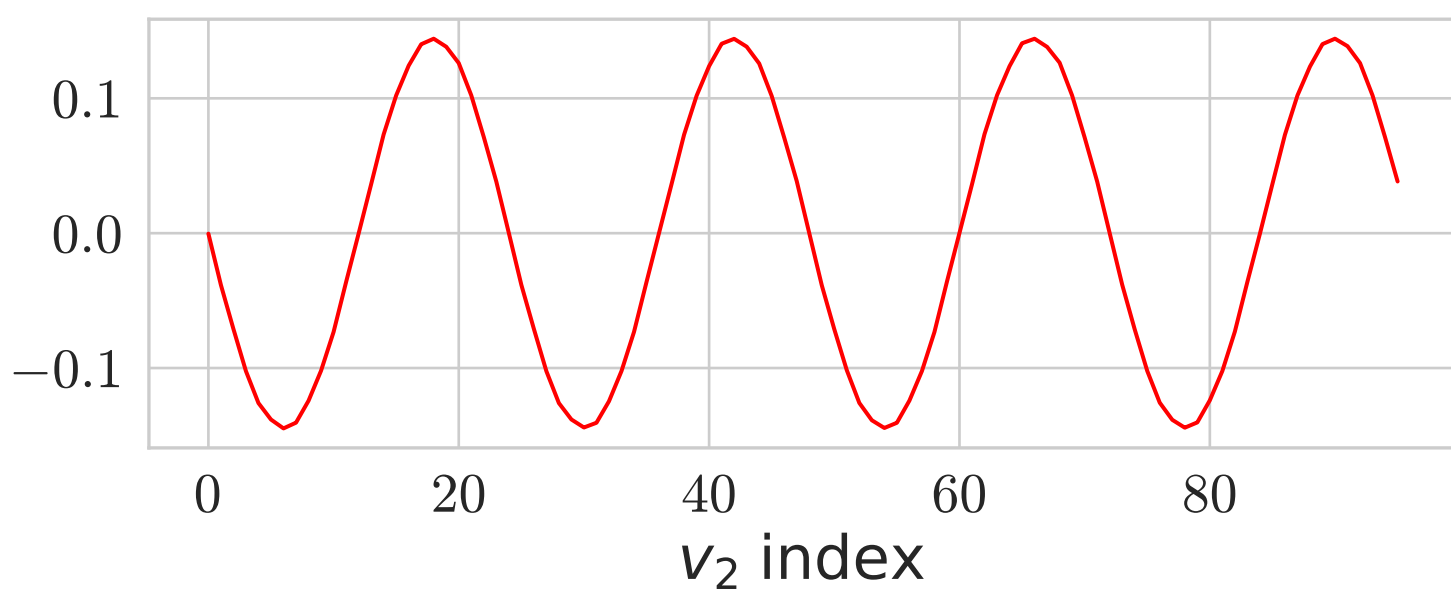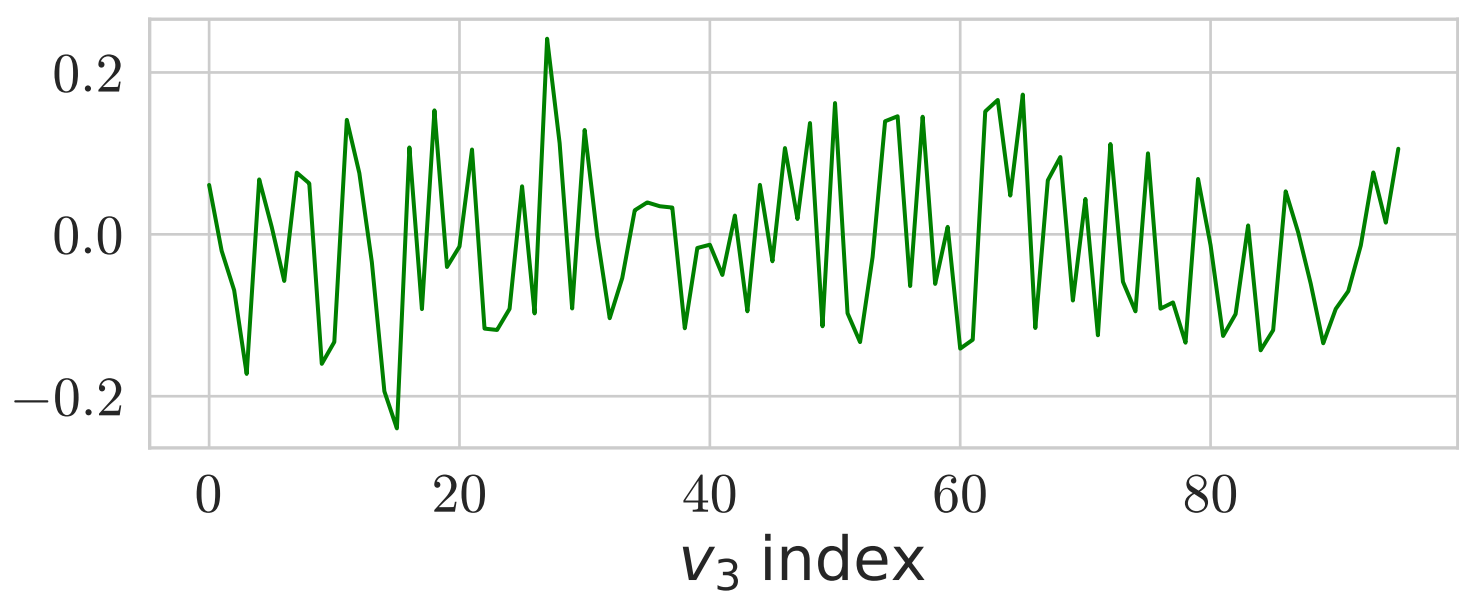

Supplement: supplementary_material [file freq_gamma_eigenvectors.pdf › iclr2026/iclr/frequency_shortcut/theoretical/old/figure/freq_gamma_eigenvectors.pdf]

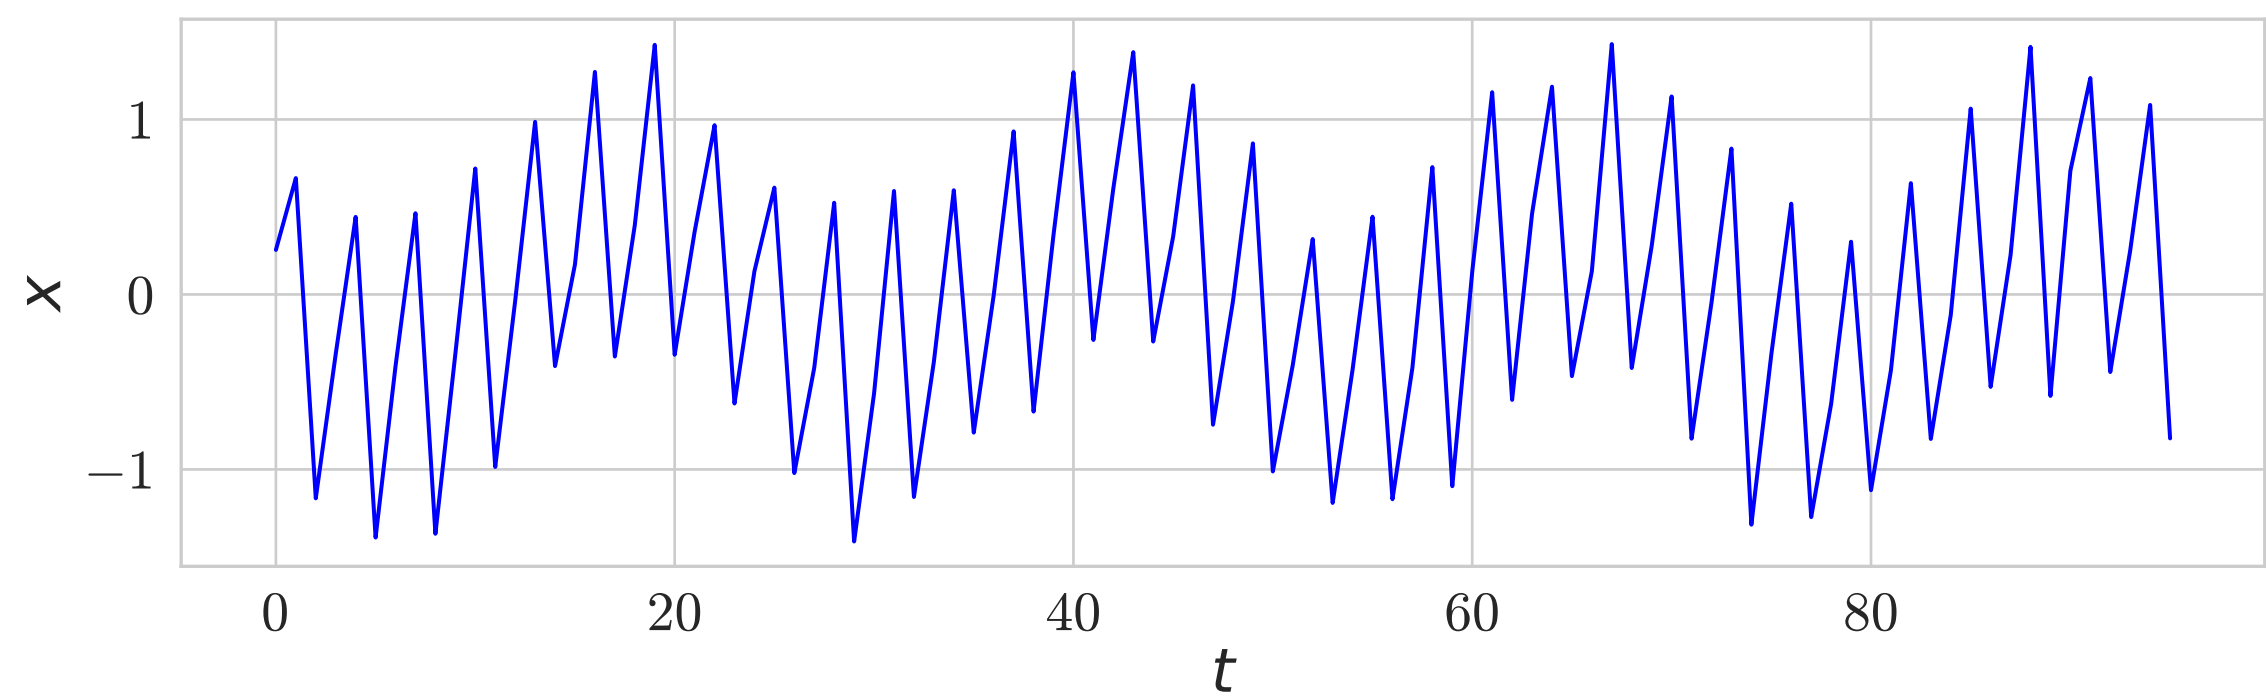

Supplement: supplementary_material [file freq_input.pdf › iclr2026/iclr/frequency_shortcut/theoretical/old/figure/freq_input.pdf]

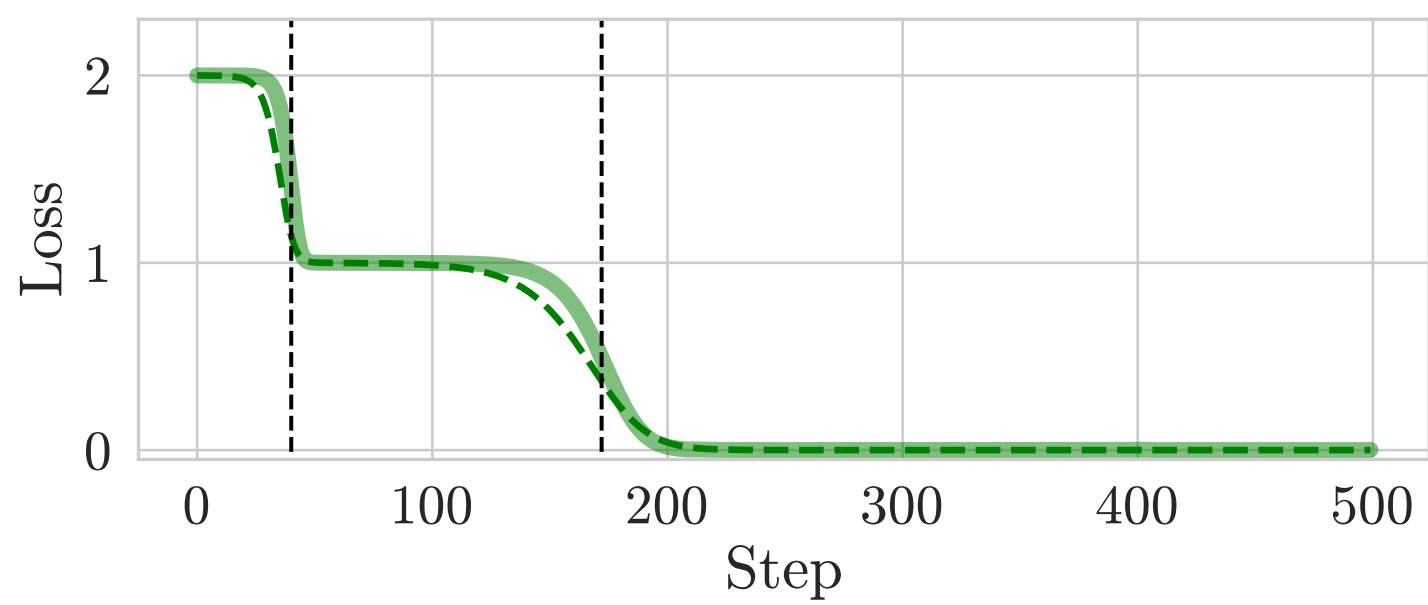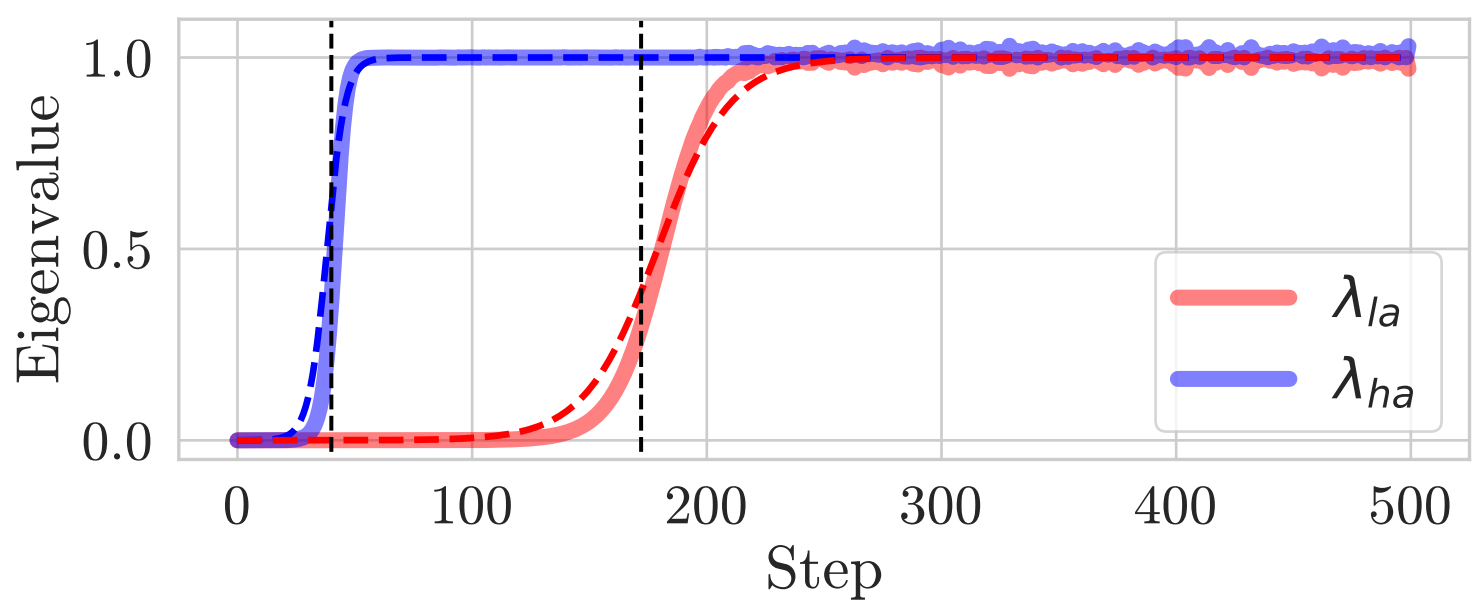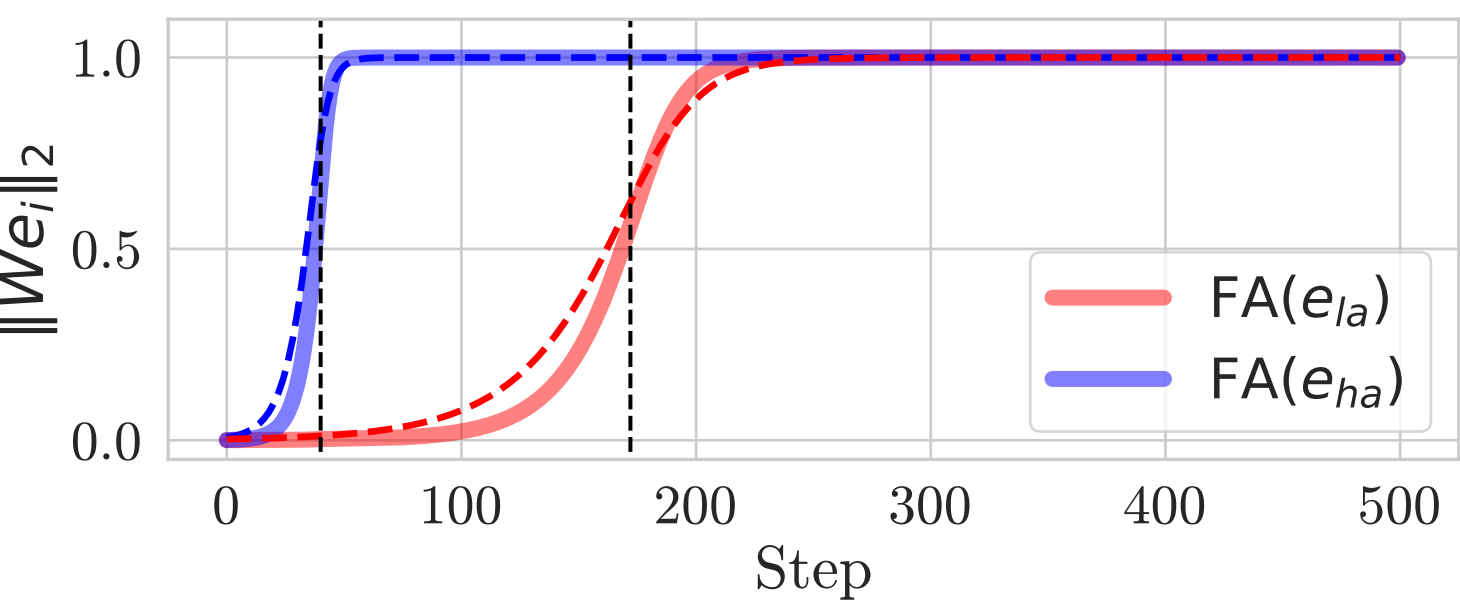

Supplement: supplementary_material [file freq_loss_eig_align.pdf › iclr2026/iclr/frequency_shortcut/theoretical/old/figure/freq_loss_eig_align.pdf]

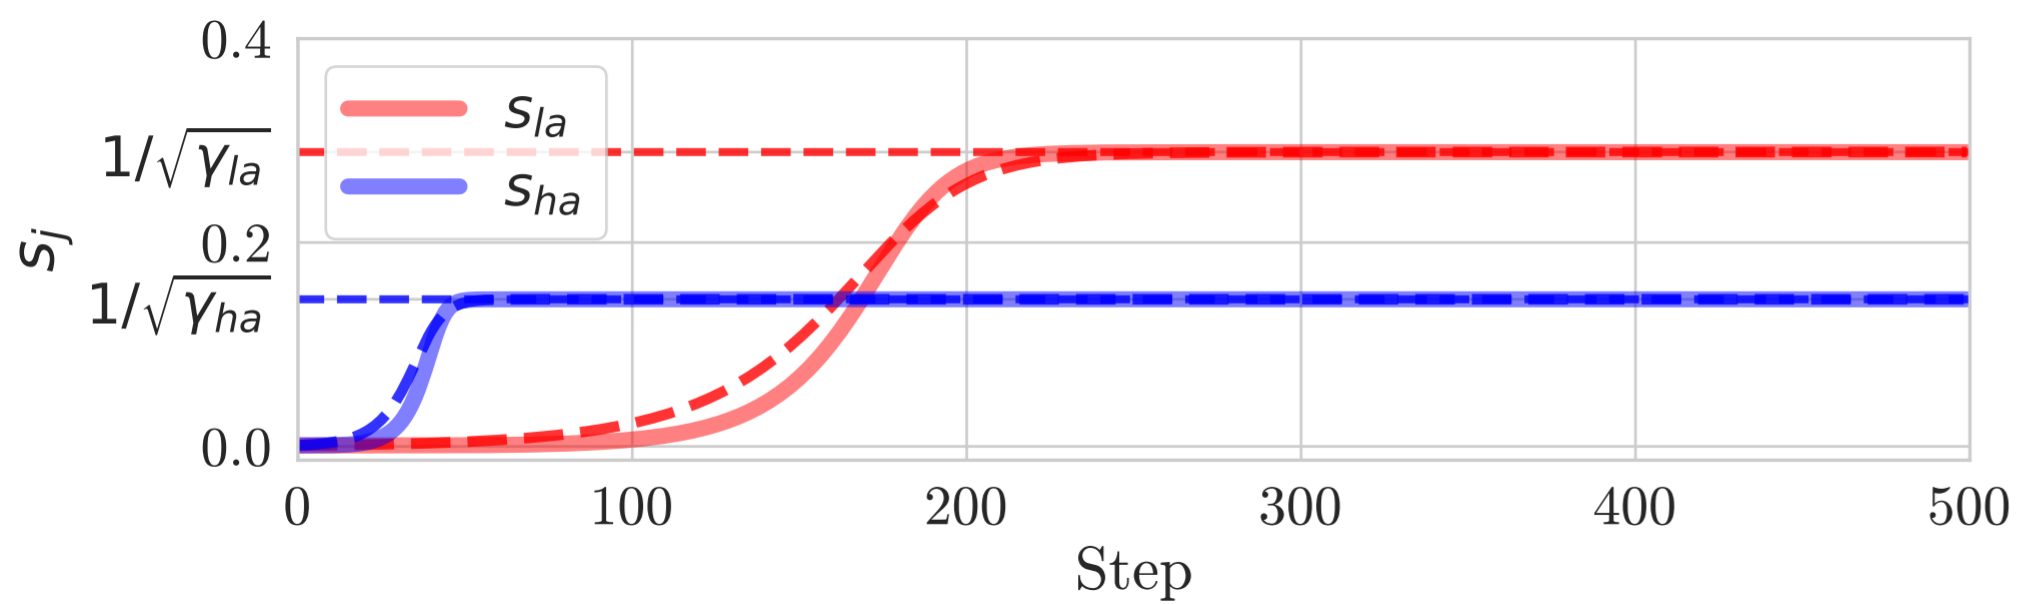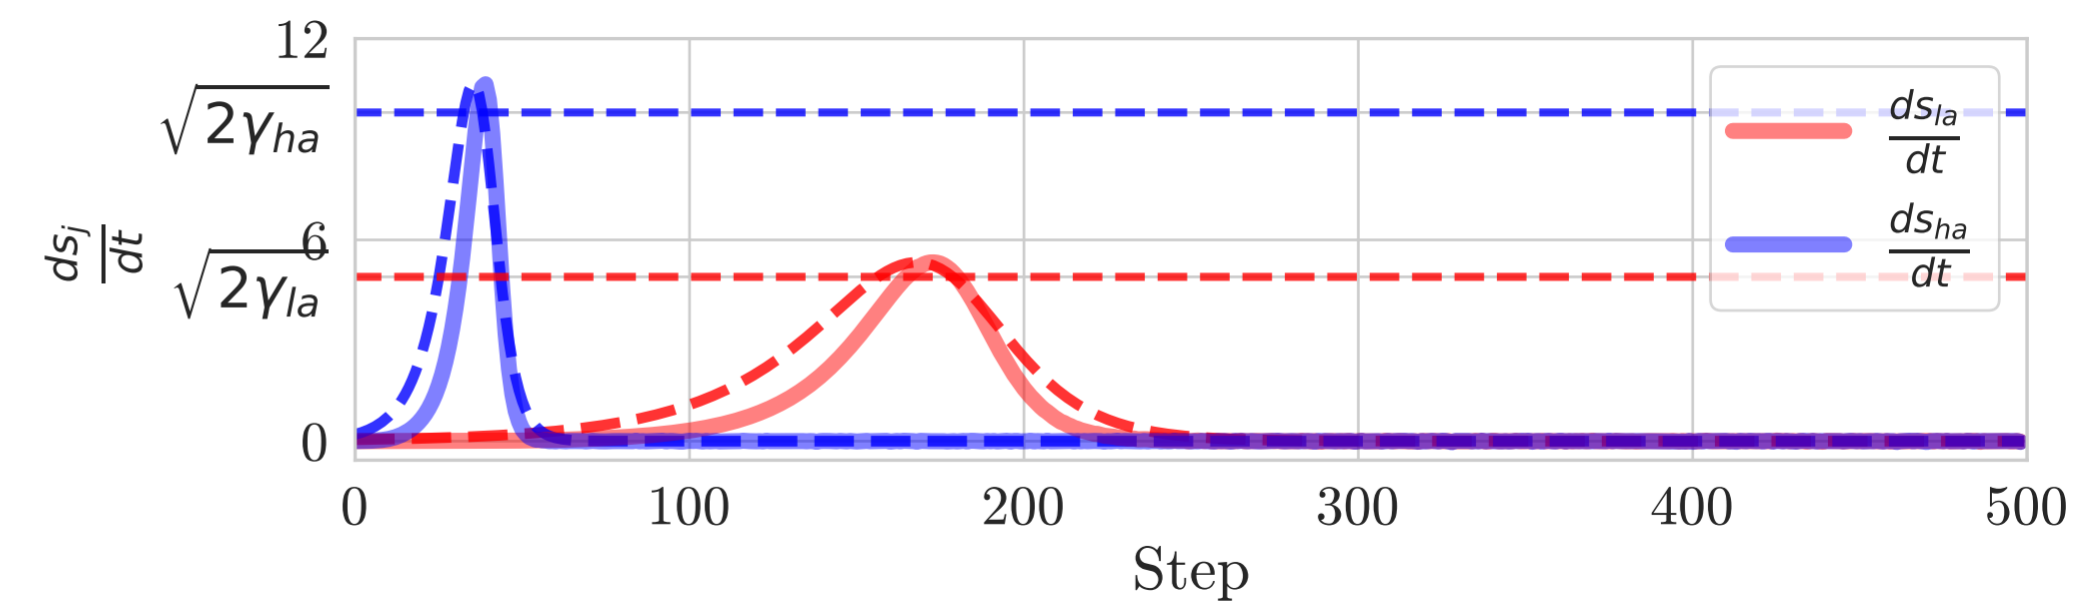

Supplement: supplementary_material [file freq_s_ds_dt.pdf › iclr2026/iclr/frequency_shortcut/theoretical/old/figure/freq_s_ds_dt.pdf]

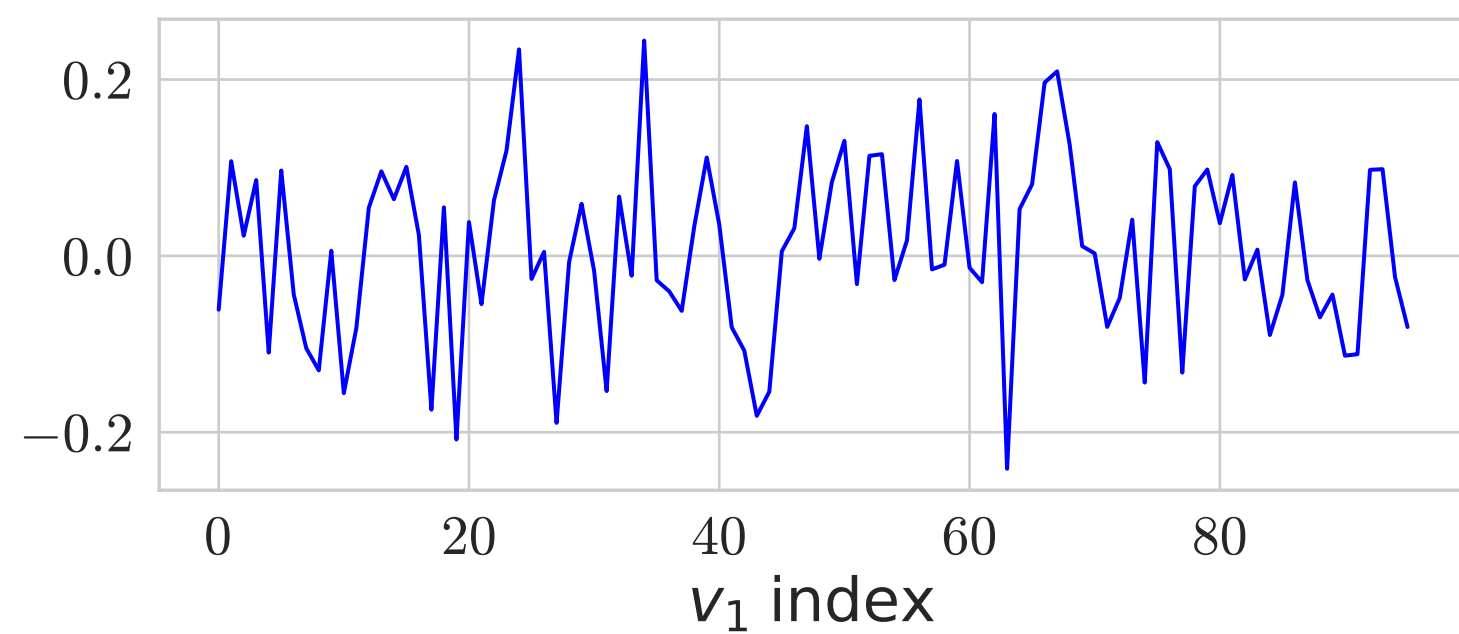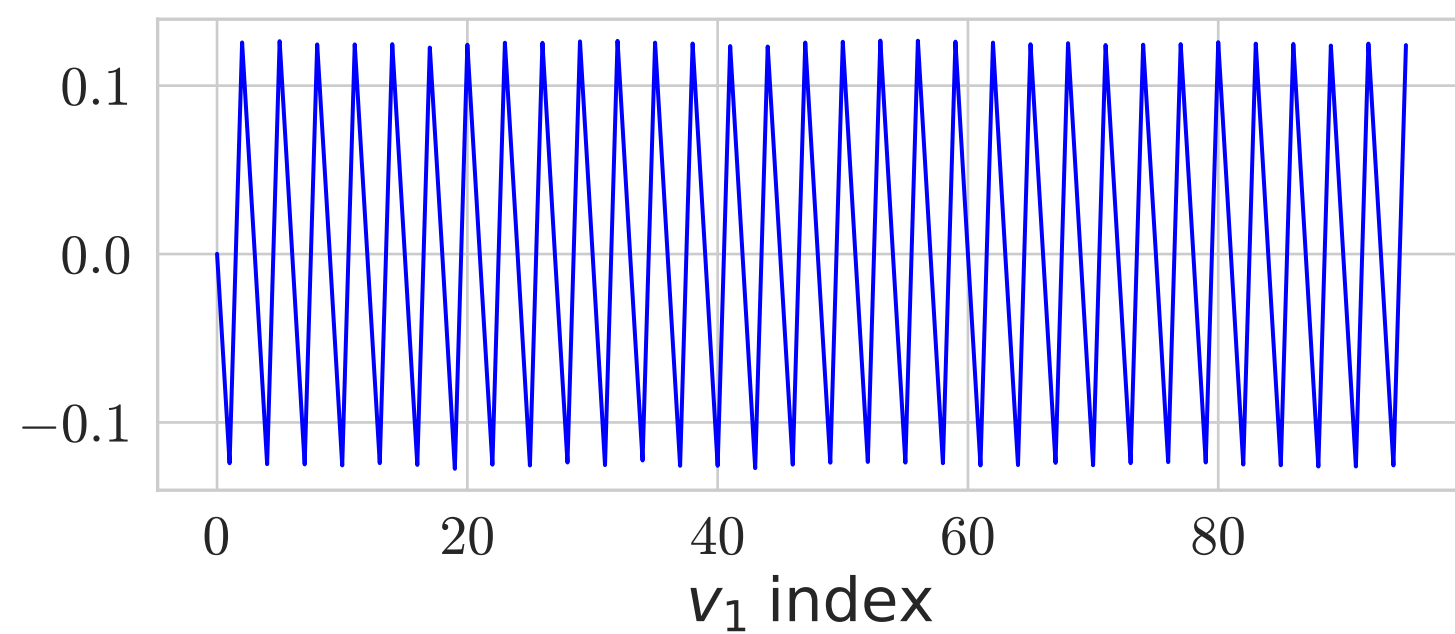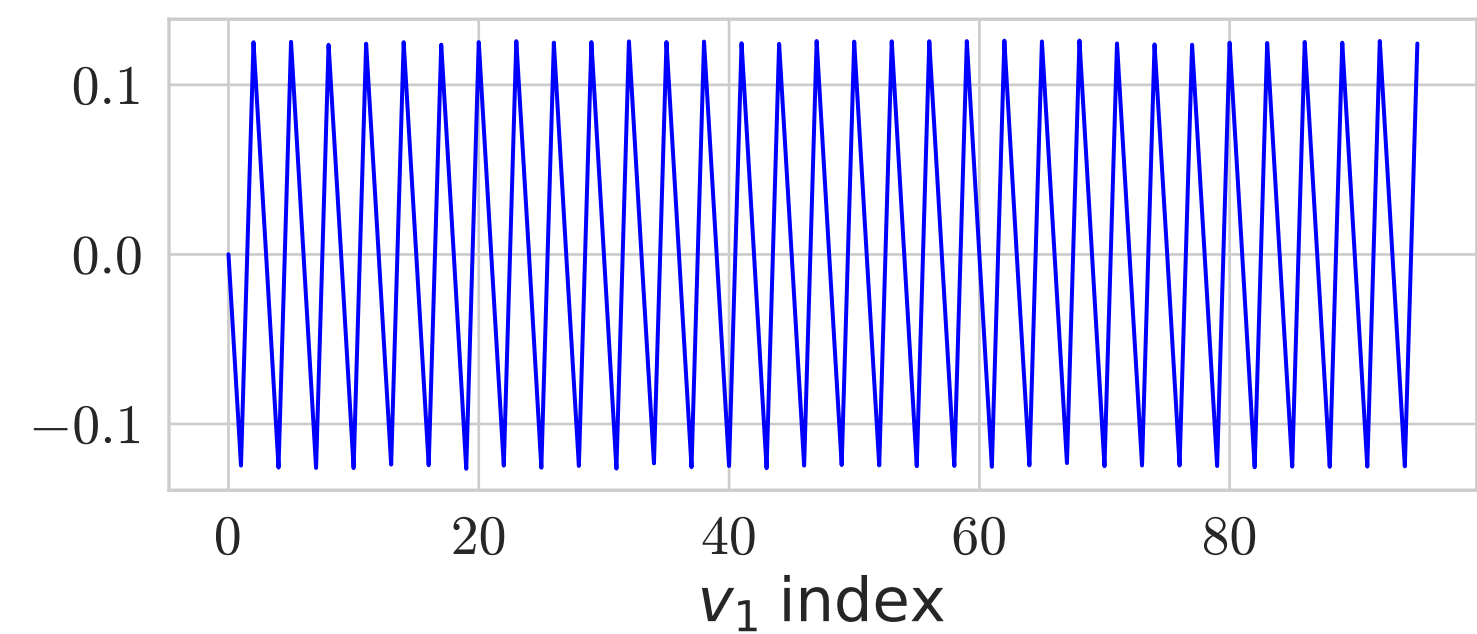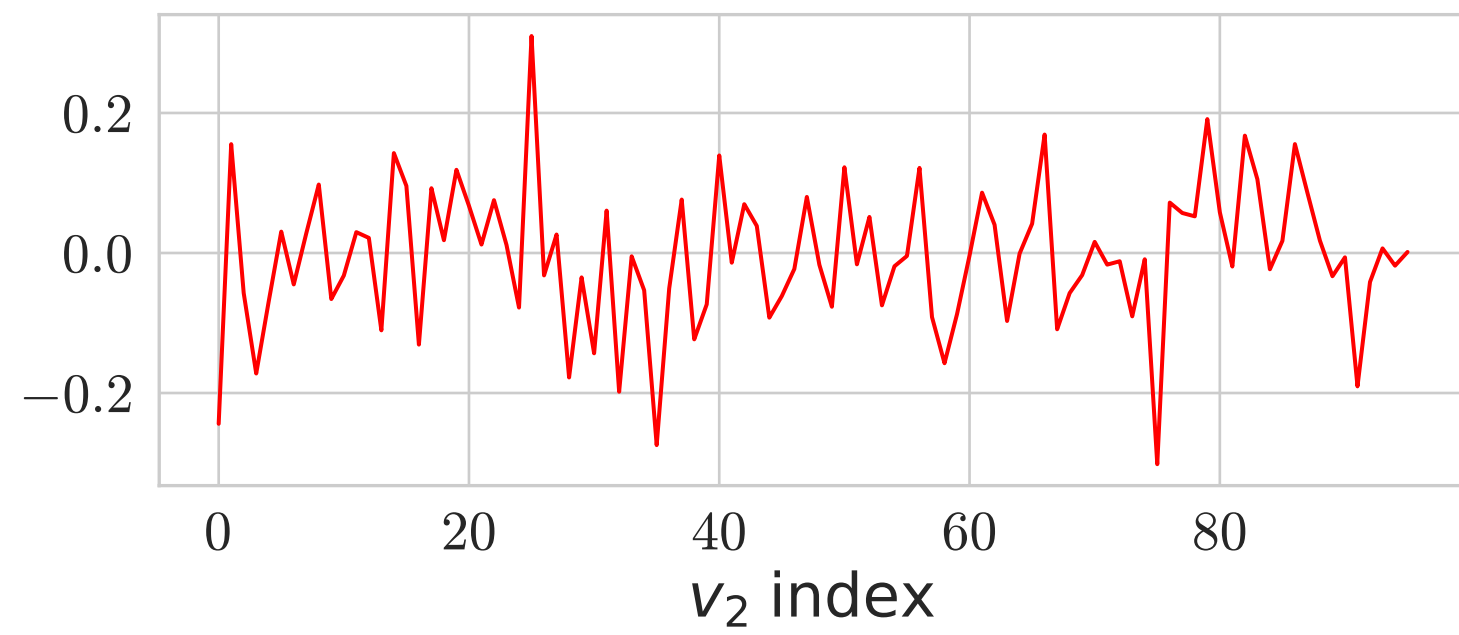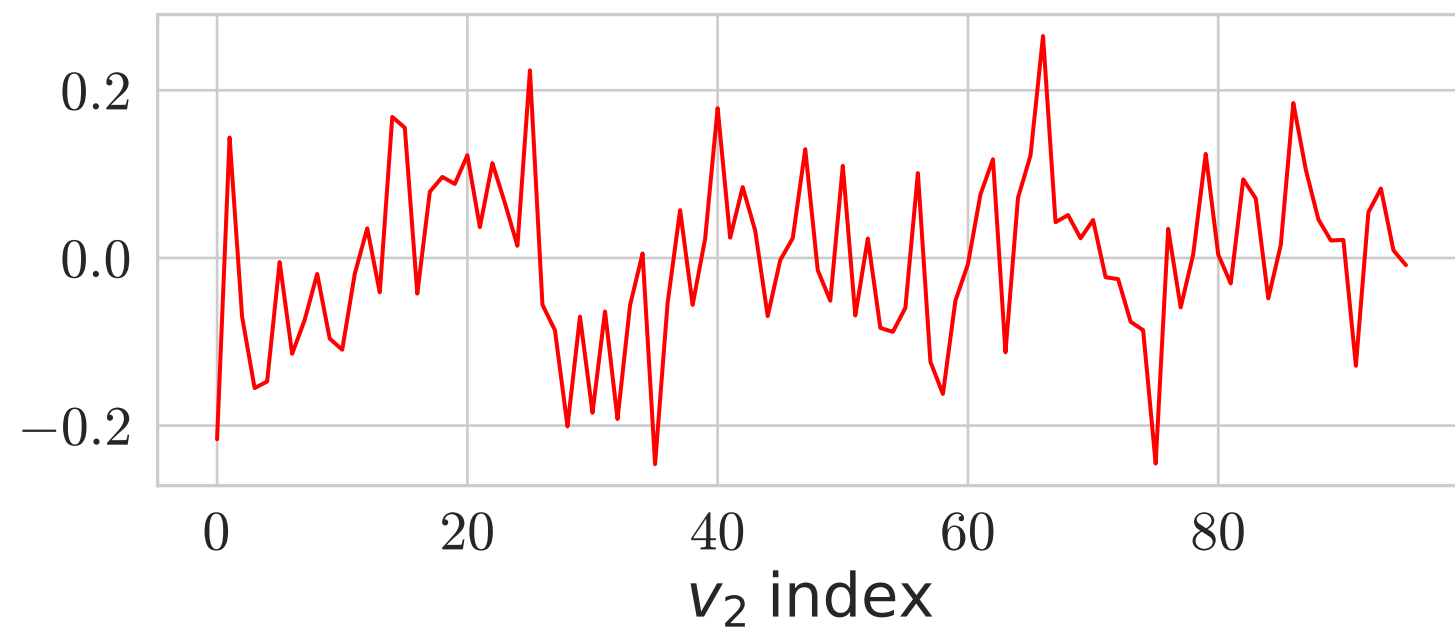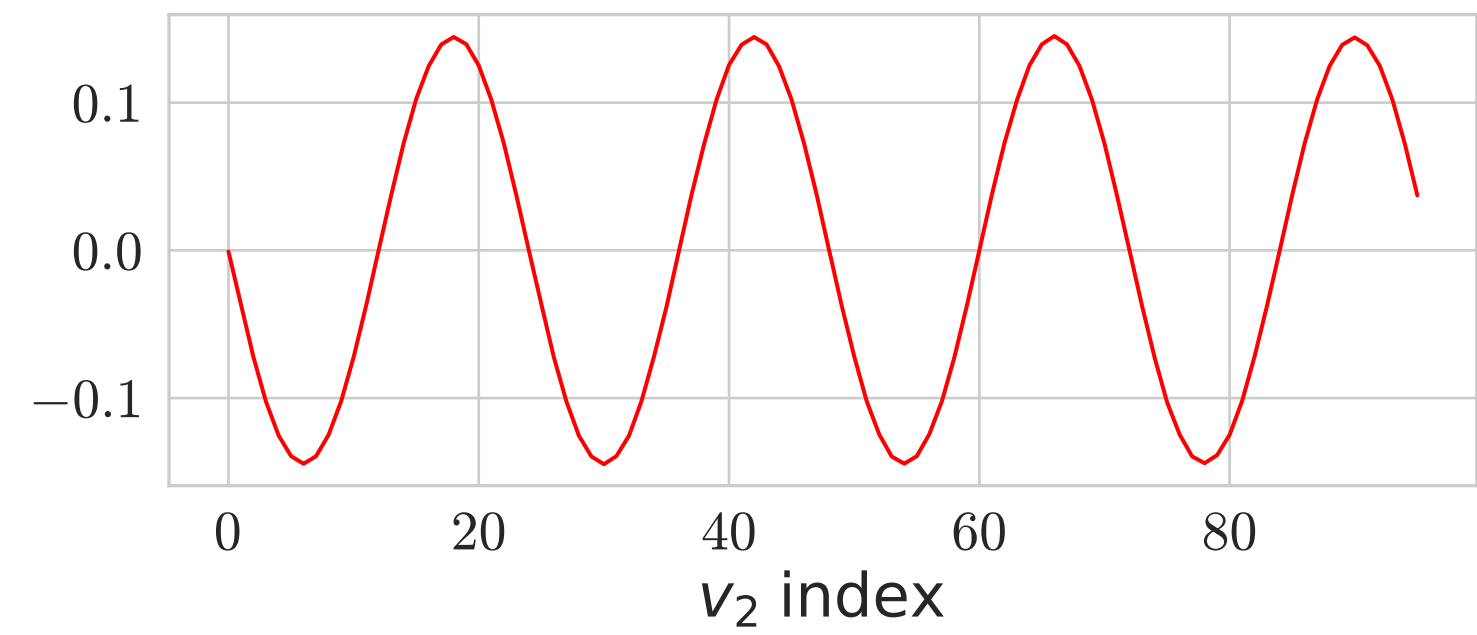

Supplement: supplementary_material [file freq_v.pdf › iclr2026/iclr/frequency_shortcut/theoretical/old/figure/freq_v.pdf]
